# Supplementary material
Source: publisher site journal article supplement (https://www.spandidos-publications.com/1551/downloadSupplementary)
Supplement: Supplementary file 2 [file downloadSupplementary]

Table SI. Comprehensive transcriptome analysis of human myofibroblasts with or without the JQ1 treatment.

| Chromosome | Region | Name | EDGE test: NC vs JQ-1, tagwise dispersions  Fold- change | EDGE  test: NC vs  JQ-1, tagwise dispersions - FDR p-value correction | NC -NC_Rep.1  Expression values | NC -NC_Rep.1  Total exon reads | NC -NC_Rep.1  RPKM | NC -NC_Rep.2  Expression values | NC -NC_Rep.2  Total exon reads | NC NC_Rep.2  RPKM | NC NC_Rep.3  Expression values | NC NC_Rep.3  Total exon reads | NC -NC_Rep.3  - RPKM | JQ-1 - JQ-  1_Rep.1 –  Expression values | JQ-1 - JQ-  1_Rep.1 - Total exon reads | JQ-1 - JQ-  1_Rep.1 -  RPKM | JQ-1 - JQ-  1_Rep.2 – Expression values | JQ-1 - JQ-  1_Rep.2 - Total exon reads | JQ-1 - JQ-  1_Rep.2 -  RPKM | JQ-1 - JQ-  1_Rep.3 – Expression values | JQ-1 - JQ-  1_Rep.3 - Total exon reads | JQ-1 - JQ-  1_Rep.3 -  RPKM |
| --- | --- | --- | --- | --- | --- | --- | --- | --- | --- | --- | --- | --- | --- | --- | --- | --- | --- | --- | --- | --- | --- | --- |
| 1 | 149754245..149783928 | HIST2H2BF | 179.2795 | 1.37E-58 | 0 | 9 | 0.284787 | 1 | 9 | 0.287225 | 0 | 9 | 0.245183 | 49 | 148 | 6.085144 | 75 | 207 | 6.487635 | 86 | 225 | 6.272819 |
| 2 | 100889753..100939195 | LONRF2 | 174.533 | 2.75E-17 | 0 | 0 | 0 | 0 | 0 | 0 | 0 | 0 | 0 | 15 | 15 | 0.097426 | 25 | 25 | 0.123775 | 19 | 19 | 0.083678 |
| 17 | 47572655..47592379 | NGFR | 144.9065 | 2.57E-14 | 0 | 0 | 0 | 0 | 0 | 0 | 0 | 0 | 0 | 11 | 39 | 0.850444 | 18 | 56 | 0.930842 | 20 | 61 | 0.901949 |
| 7 | 94285637..94299007 | PEG10 | 86.0621 | 0 | 585 | 585 | 6.146176 | 667 | 667 | 7.067686 | 795 | 795 | 7.190955 | 38422 | 38422 | 524.5189 | 49494 | 49494 | 515.0396 | 58449 | 58449 | 541.0399 |
| 6 | 26188938..26189304 | HIST1H4D | 83.05041 | 7.43E-08 | 0 | 0 | 0 | 0 | 0 | 0 | 0 | 0 | 0 | 4 | 4 | 0.986332 | 9 | 9 | 1.691658 | 15 | 15 | 2.507988 |
| 1 | 6484848..6521430 | ESPN | 80.45782 | 6.82E-08 | 0 | 0 | 0 | 0 | 0 | 0 | 0 | 0 | 0 | 8 | 8 | 0.176191 | 11 | 12 | 0.201456 | 8 | 8 | 0.119469 |
| 6 | 26183958..26184454 | HIST1H2BE | 80.36353 | 7.06E-08 | 0 | 0 | 0 | 0 | 0 | 0 | 0 | 0 | 0 | 8 | 10 | 1.820844 | 6 | 6 | 0.832781 | 13 | 14 | 1.72851 |
| 16 | 84002237..84036381 | NECAB2 | 73.604 | 6.2E-106 | 2 | 2 | 0.055275 | 4 | 4 | 0.111496 | 1 | 1 | 0.023794 | 129 | 129 | 4.632531 | 174 | 174 | 4.763047 | 147 | 147 | 3.579456 |
| 6 | 43211418..43255997 | TTBK1 | 71.56968 | 4.64E-07 | 0 | 0 | 0 | 0 | 0 | 0 | 0 | 0 | 0 | 7 | 7 | 0.084429 | 7 | 7 | 0.064358 | 10 | 10 | 0.081783 |
| 1 | 11539223..11597641 | PTCHD2 | 65.74897 | 1.73E-06 | 0 | 0 | 0 | 0 | 0 | 0 | 0 | 0 | 0 | 8 | 8 | 0.117795 | 5 | 5 | 0.056119 | 9 | 9 | 0.089857 |
| 10 | 98124363..98273675 | TLL2 | 63.29196 | 3.74E-21 | 0 | 0 | 0 | 0 | 0 | 0 | 1 | 1 | 0.007356 | 14 | 14 | 0.155434 | 25 | 25 | 0.211575 | 35 | 35 | 0.263486 |
| 12 | 44902058..45315631 | NELL2 | 62.33742 | 2.78E-05 | 0 | 0 | 0 | 0 | 0 | 0 | 0 | 0 | 0 | 13 | 13 | 0.183133 | 4 | 4 | 0.042953 | 3 | 3 | 0.028656 |
| 7 | 74379083..74438803 | GATSL1 | 60.00373 | 6.69E-06 | 0 | 0 | 0 | 0 | 0 | 0 | 0 | 0 | 0 | 8 | 16 | 1.462561 | 9 | 18 | 1.254219 | 3 | 8 | 0.495855 |
| 6 | 26197068..26199521 | HIST1H3D | 59.52111 | 2.1E-118 | 6 | 6 | 0.483095 | 3 | 5 | 0.406026 | 3 | 4 | 0.277275 | 145 | 200 | 20.92392 | 210 | 296 | 23.60542 | 262 | 353 | 25.04141 |
| 19 | 55940107..55954230 | SHISA7 | 56.89252 | 2.23E-05 | 0 | 0 | 0 | 0 | 0 | 0 | 0 | 0 | 0 | 6 | 6 | 0.089261 | 6 | 6 | 0.068041 | 7 | 7 | 0.070612 |
| 6 | 26199748..26200942 | HIST1H2BF | 56.74197 | 2.31E-05 | 0 | 0 | 0 | 0 | 0 | 0 | 0 | 0 | 0 | 2 | 2 | 0.151458 | 9 | 9 | 0.51953 | 8 | 8 | 0.410792 |
| 19 | 2289774..2308156 | LINGO3 | 48.09907 | 3.51E-16 | 1 | 1 | 0.029865 | 0 | 0 | 0 | 0 | 0 | 0 | 12 | 12 | 0.465674 | 24 | 24 | 0.709935 | 20 | 20 | 0.526262 |
| 6 | 26216428..26216872 | HIST1H2BG | 47.98073 | 5.87E-79 | 5 | 5 | 0.782541 | 1 | 1 | 0.157848 | 1 | 1 | 0.134743 | 71 | 71 | 14.43868 | 98 | 98 | 15.19155 | 127 | 127 | 17.51233 |
| 16 | 56716336..56718108 | MT1X | 47.27015 | 5.9E-121 | 55 | 67 | 5.669857 | 49 | 61 | 5.206303 | 78 | 87 | 6.338506 | 1950 | 2142 | 235.5314 | 2495 | 2941 | 246.5082 | 2682 | 3166 | 236.054 |
| 1 | 149804221..149811339 | HIST2H4A | 41.24608 | 1.29E-42 | 0 | 26 | 0.963191 | 1 | 32 | 1.195616 | 3 | 60 | 1.913643 | 45 | 1823 | 87.7522 | 57 | 2116 | 77.6415 | 48 | 1634 | 53.33281 |
| 16 | 3493611..3536963 | NAA60_2 | 41.178 | 0.010322 | 0 | 0 | 0 | 0 | 0 | 0 | 0 | 0 | 0 | 12 | 63 | 2.08455 | 0 | 0 | 0 | 0 | 0 | 0 |
| 6 | 26115101..26124154 | HIST1H2BC | 39.34449 | 6.3E-142 | 21 | 23 | 1.920697 | 6 | 6 | 0.505341 | 12 | 12 | 0.862745 | 364 | 370 | 40.14809 | 437 | 440 | 36.39341 | 482 | 487 | 35.83135 |
| 6 | 26281283..26285762 | HIST1H4H | 38.39612 | 4.6E-121 | 10 | 10 | 0.67356 | 6 | 6 | 0.407596 | 15 | 15 | 0.869838 | 279 | 279 | 24.41816 | 351 | 351 | 23.41654 | 367 | 367 | 21.77939 |
| 12 | 110152033..110208312 | FAM222A | 38.1349 | 5.94E-28 | 2 | 4 | 0.074848 | 0 | 4 | 0.075489 | 1 | 2 | 0.03222 | 27 | 97 | 2.358439 | 28 | 122 | 2.261099 | 53 | 171 | 2.819162 |
| 21 | 34619079..34655517 | AP000295.9 | 36.38387 | 0.002094 | 0 | 0 | 0 | 0 | 0 | 0 | 0 | 0 | 0 | 6 | 9 | 0.814464 | 4 | 5 | 0.34491 | 2 | 2 | 0.122724 |
| 12 | 13153385..13193613 | RP11-377D9.3 | 36.32721 | 0.002065 | 0 | 0 | 0 | 0 | 0 | 0 | 0 | 0 | 0 | 5 | 5 | 0.188298 | 3 | 3 | 0.08612 | 4 | 4 | 0.102142 |
| X | 85403462..86087607 | DACH2 | 33.30364 | 0.003928 | 0 | 0 | 0 | 0 | 0 | 0 | 0 | 0 | 0 | 2 | 2 | 0.025753 | 3 | 3 | 0.029446 | 6 | 6 | 0.052387 |
| 16 | 56672578..56673999 | MT1A | 32.43418 | 1.2E-119 | 7 | 7 | 1.231119 | 4 | 4 | 0.709519 | 7 | 7 | 1.059913 | 123 | 123 | 28.10859 | 185 | 185 | 32.22646 | 188 | 189 | 29.28646 |
| X | 117957753..117960931 | ZCCHC12 | 31.93385 | 1.91E-09 | 1 | 1 | 0.031217 | 0 | 0 | 0 | 0 | 0 | 0 | 11 | 11 | 0.446193 | 13 | 13 | 0.401957 | 13 | 14 | 0.38506 |
| 7 | 95212811..95225803 | PDK4 | 31.30213 | 8.9E-125 | 6 | 6 | 0.092471 | 15 | 15 | 0.233157 | 9 | 9 | 0.119417 | 190 | 190 | 3.804876 | 312 | 312 | 4.762647 | 291 | 291 | 3.951399 |
| 19 | 5720688..5778745 | CATSPERD | 30.40874 | 0.00761 | 0 | 0 | 0 | 0 | 0 | 0 | 0 | 0 | 0 | 4 | 4 | 0.117375 | 0 | 0 | 0 | 6 | 6 | 0.119382 |
| X | 38420623..38548169 | TSPAN7 | 30.39651 | 0.007467 | 0 | 0 | 0 | 0 | 0 | 0 | 0 | 0 | 0 | 3 | 3 | 0.087436 | 2 | 2 | 0.044433 | 5 | 6 | 0.118574 |
| 16 | 333152..337215 | PDIA2 | 30.38605 | 0.007526 | 0 | 0 | 0 | 0 | 0 | 0 | 0 | 0 | 0 | 3 | 3 | 0.120769 | 1 | 1 | 0.030686 | 6 | 6 | 0.163778 |
| 6 | 124125286..125146803 | NKAIN2 | 30.36638 | 0.014171 | 0 | 0 | 0 | 0 | 0 | 0 | 0 | 0 | 0 | 2 | 2 | 0.044404 | 2 | 2 | 0.033848 | 6 | 6 | 0.090327 |
| 16 | 71481503..71523214 | AC010547.9 | 30.35643 | 0.014157 | 0 | 0 | 0 | 0 | 0 | 0 | 0 | 0 | 0 | 1 | 4 | 0.098445 | 4 | 11 | 0.206365 | 5 | 18 | 0.300386 |
| 4 | 3443614..3451211 | HGFAC | 30.32589 | 0.014289 | 0 | 0 | 0 | 0 | 0 | 0 | 0 | 0 | 0 | 0 | 0 | 0 | 5 | 5 | 0.121619 | 5 | 5 | 0.108184 |
| 15 | 45653322..45694525 | GATM | 30.20553 | 6.69E-09 | 1 | 1 | 0.010483 | 0 | 0 | 0 | 0 | 0 | 0 | 9 | 9 | 0.122586 | 14 | 14 | 0.145357 | 12 | 12 | 0.110829 |
| 6 | 26158349..26171577 | HIST1H2BD | 30.09709 | 1.79E-85 | 52 | 54 | 4.188076 | 41 | 41 | 3.207059 | 60 | 60 | 4.00629 | 1010 | 1015 | 102.2866 | 1301 | 1312 | 100.7845 | 1526 | 1545 | 105.5729 |
| 15 | 83328033..83378666 | AP3B2 | 28.36028 | 8E-101 | 7 | 12 | 0.111226 | 9 | 12 | 0.112178 | 1 | 5 | 0.039899 | 112 | 147 | 1.770416 | 133 | 173 | 1.588221 | 165 | 217 | 1.772102 |
| 22 | 39966758..40085742 | CACNA1I | 27.77975 | 1.77E-19 | 1 | 1 | 0.00642 | 0 | 0 | 0 | 2 | 2 | 0.011054 | 27 | 27 | 0.225218 | 18 | 18 | 0.114451 | 33 | 33 | 0.186648 |

| 17 | 39873994..39890896 | HAP1 | 27.49398 | 0.014171 | 0 | 2 | 0.022383 | 0 | 1 | 0.011288 | 0 | 0 | 0 | 4 | 6 | 0.087253 | 2 | 14 | 0.15519 | 3 | 17 | 0.167629 |
| --- | --- | --- | --- | --- | --- | --- | --- | --- | --- | --- | --- | --- | --- | --- | --- | --- | --- | --- | --- | --- | --- | --- |
| X | 48929385..48937546 | AF196779.12 | 27.49337 | 0.01457 | 0 | 0 | 0 | 0 | 0 | 0 | 0 | 0 | 0 | 2 | 2 | 0.153905 | 7 | 8 | 0.469266 | 0 | 0 | 0 |
| 7 | 98246609..98259180 | NPTX2 | 27.36914 | 1.22E-31 | 1 | 1 | 0.023092 | 2 | 2 | 0.04658 | 2 | 2 | 0.039762 | 25 | 25 | 0.750132 | 46 | 46 | 1.052114 | 52 | 52 | 1.057967 |
| 7 | 65552756..65617228 | AC068533.7 | 27.11718 | 0.000759 | 0 | 0 | 0 | 0 | 0 | 0 | 1 | 2 | 0.136585 | 5 | 8 | 0.824565 | 0 | 0 | 0 | 28 | 46 | 3.214871 |
| 6 | 26204858..26206266 | HIST1H4E | 25.69309 | 4.36E-52 | 4 | 4 | 0.197718 | 5 | 5 | 0.249263 | 0 | 0 | 0 | 46 | 46 | 2.954446 | 78 | 78 | 3.818737 | 77 | 77 | 3.353358 |
| 14 | 100150641..100193638 | CYP46A1 | 25.00392 | 2.52E-55 | 1 | 1 | 0.007446 | 8 | 8 | 0.060075 | 2 | 2 | 0.01282 | 62 | 62 | 0.599824 | 73 | 73 | 0.538346 | 102 | 102 | 0.669119 |
| 3 | 185677732..185698658 | RP11-443P15.2 | 24.855 | 1.07E-70 | 5 | 5 | 0.132659 | 6 | 6 | 0.160554 | 2 | 2 | 0.045684 | 67 | 67 | 2.309802 | 102 | 102 | 2.680446 | 108 | 108 | 2.524612 |
| 6 | 27775899..27776429 | HIST1H2AI | 24.82628 | 4.93E-29 | 0 | 0 | 0 | 3 | 4 | 0.529133 | 2 | 2 | 0.225841 | 33 | 48 | 8.180426 | 34 | 48 | 6.235666 | 44 | 58 | 6.702452 |
| 17 | 39775689..39781094 | KRT17 | 24.56192 | 0.02688 | 0 | 4 | 0.109809 | 0 | 0 | 0 | 0 | 0 | 0 | 4 | 7 | 0.249693 | 2 | 6 | 0.163142 | 2 | 5 | 0.120934 |
| 22 | 30681227..30695471 | RP1-130H16.18 | 22.95554 | 0.000755 | 1 | 5 | 0.169291 | 0 | 0 | 0 | 0 | 0 | 0 | 12 | 19 | 0.835889 | 0 | 0 | 0 | 14 | 28 | 0.835264 |
| 17 | 3558915..3561386 | RP11-235E17.6 | 21.67569 | 2.44E-07 | 0 | 15 | 1.1953 | 0 | 9 | 0.72332 | 1 | 6 | 0.41163 | 7 | 44 | 4.555861 | 10 | 60 | 4.73561 | 8 | 60 | 4.212501 |
| 3 | 49591922..49708978 | BSN | 21.47183 | 1.4E-152 | 10 | 10 | 0.042925 | 14 | 14 | 0.06061 | 14 | 14 | 0.051738 | 175 | 175 | 0.976074 | 246 | 246 | 1.045891 | 264 | 264 | 0.998434 |
| 20 | 627259..634014 | SRXN1 | 20.65542 | 2.01E-85 | 92 | 577 | 14.89467 | 83 | 588 | 15.30858 | 87 | 683 | 15.17911 | 1203 | 8283 | 277.8273 | 1591 | 11041 | 282.2946 | 1710 | 11182 | 254.3184 |
| 1 | 149856010..149858232 | HIST2H2BE | 20.51251 | 8.21E-86 | 69 | 76 | 2.381065 | 79 | 87 | 2.749028 | 87 | 92 | 2.481509 | 1064 | 1129 | 45.96039 | 1379 | 1488 | 46.17422 | 1568 | 1695 | 46.78757 |
| 9 | 37512544..37592466 | RP11-613M10.8 | 20.08612 | 0.003893 | 0 | 3 | 0.064948 | 0 | 9 | 0.196513 | 1 | 2 | 0.037277 | 18 | 44 | 1.237744 | 1 | 1 | 0.021443 | 1 | 2 | 0.038149 |
| 19 | 825097..832017 | AZU1 | 20.02826 | 9.66E-07 | 0 | 0 | 0 | 0 | 0 | 0 | 1 | 1 | 0.03346 | 10 | 11 | 0.5555 | 8 | 8 | 0.307956 | 5 | 5 | 0.171211 |
| 12 | 49250928..49259681 | RND1 | 19.99769 | 9.31E-07 | 0 | 0 | 0 | 0 | 0 | 0 | 1 | 1 | 0.029135 | 8 | 8 | 0.351782 | 10 | 10 | 0.33519 | 5 | 5 | 0.149082 |
| 16 | 83981887..83999937 | OSGIN1 | 19.89706 | 9.4E-110 | 173 | 173 | 3.482308 | 165 | 165 | 3.349711 | 189 | 190 | 3.292645 | 2286 | 2286 | 59.79011 | 3137 | 3137 | 62.5424 | 3302 | 3303 | 58.57776 |
| 11 | 61735453..61736755 | AP003733.1 | 19.76078 | 4.57E-10 | 0 | 0 | 0 | 0 | 0 | 0 | 2 | 2 | 0.092035 | 16 | 16 | 1.111232 | 8 | 8 | 0.423528 | 15 | 15 | 0.706394 |
| 4 | 75230860..75254468 | EREG | 19.1825 | 5.47E-10 | 1 | 1 | 0.012182 | 0 | 0 | 0 | 1 | 1 | 0.010488 | 11 | 11 | 0.174122 | 13 | 13 | 0.15686 | 14 | 14 | 0.150266 |
| 5 | 90598846..90610219 | LUCAT1 | 19.05222 | 3.67E-05 | 1 | 1 | 0.023983 | 0 | 0 | 0 | 0 | 0 | 0 | 4 | 7 | 0.218138 | 6 | 9 | 0.213787 | 12 | 13 | 0.274693 |
| 3 | 25215823..25639423 | RARB | 18.62477 | 7.32E-60 | 64 | 64 | 1.205668 | 43 | 43 | 0.816993 | 89 | 89 | 1.443471 | 824 | 824 | 20.17005 | 1030 | 1030 | 19.2187 | 1169 | 1169 | 19.40284 |
| 3 | 47603729..47622282 | CSPG5 | 18.5535 | 7.9E-13 | 1 | 1 | 0.015952 | 0 | 0 | 0 | 2 | 2 | 0.027467 | 18 | 18 | 0.373094 | 18 | 18 | 0.284397 | 16 | 16 | 0.224873 |
| 10 | 97071528..97321171 | SORBS1 | 18.34655 | 1E-68 | 4 | 4 | 0.02575 | 6 | 6 | 0.038955 | 8 | 8 | 0.044337 | 83 | 83 | 0.694257 | 96 | 96 | 0.612097 | 100 | 100 | 0.56717 |
| 1 | 155036224..155059283 | EFNA3_1 | 18.22979 | 6.16E-06 | 0 | 0 | 0 | 0 | 0 | 0 | 1 | 2 | 0.115088 | 4 | 8 | 0.694787 | 9 | 18 | 1.191629 | 8 | 16 | 0.94222 |
| 6 | 32939842..32940630 | XXbac-BPG181M1 | 17.68635 | 1.95E-18 | 1 | 1 | 0.120704 | 2 | 4 | 0.486949 | 2 | 4 | 0.415673 | 19 | 30 | 4.705163 | 37 | 54 | 6.455859 | 23 | 30 | 3.190404 |
| 8 | 144501352..144512576 | MAFA | 17.63041 | 0.000125 | 1 | 1 | 0.027814 | 0 | 0 | 0 | 0 | 0 | 0 | 12 | 12 | 0.433687 | 2 | 2 | 0.055097 | 6 | 6 | 0.147034 |
| 2 | 25264999..25378243 | EFR3B | 17.39109 | 1.1E-106 | 18 | 18 | 0.183601 | 11 | 11 | 0.113161 | 20 | 20 | 0.175632 | 170 | 170 | 2.253121 | 282 | 282 | 2.848995 | 263 | 263 | 2.363537 |
| 1 | 90459152..90459880 | GEMIN8P4 | 17.37224 | 0.000119 | 0 | 0 | 0 | 0 | 0 | 0 | 1 | 1 | 0.094278 | 4 | 4 | 0.569157 | 7 | 7 | 0.759236 | 9 | 9 | 0.868332 |
| 12 | 107712190..108053419 | BTBD11 | 17.15078 | 3.37E-25 | 1 | 1 | 0.008789 | 1 | 1 | 0.008865 | 5 | 5 | 0.037835 | 30 | 30 | 0.342615 | 33 | 33 | 0.28728 | 42 | 42 | 0.325241 |
| 2 | 99235569..99347589 | MGAT4A | 17.07707 | 1.51E-11 | 1 | 1 | 0.007232 | 1 | 1 | 0.007294 | 1 | 1 | 0.006226 | 11 | 11 | 0.10337 | 21 | 21 | 0.150428 | 16 | 16 | 0.101952 |
| 19 | 50815194..50836772 | KCNC3 | 16.7864 | 3.13E-14 | 1 | 1 | 0.011095 | 1 | 1 | 0.01119 | 2 | 2 | 0.019105 | 18 | 18 | 0.259507 | 23 | 23 | 0.252762 | 20 | 20 | 0.195514 |
| 6 | 26031817..26032288 | HIST1H3B | 16.5047 | 0.000227 | 0 | 0 | 0 | 0 | 0 | 0 | 1 | 1 | 0.127036 | 2 | 2 | 0.383457 | 10 | 10 | 1.461484 | 7 | 7 | 0.910031 |
| 11 | 65122238..65125084 | TIGD3 | 16.4953 | 7.35E-14 | 3 | 3 | 0.103846 | 1 | 1 | 0.034912 | 0 | 0 | 0 | 16 | 16 | 0.71965 | 26 | 26 | 0.891418 | 18 | 18 | 0.548965 |
| 7 | 130538479..130613408 | AC016831.7 | 15.69936 | 3.9E-13 | 2 | 2 | 0.086196 | 2 | 2 | 0.086934 | 0 | 0 | 0 | 20 | 20 | 1.12 | 17 | 17 | 0.725678 | 20 | 20 | 0.759432 |
| 5 | 127873706..128369335 | SLC27A6 | 15.67963 | 6.42E-07 | 0 | 0 | 0 | 2 | 2 | 0.040219 | 0 | 0 | 0 | 10 | 10 | 0.259078 | 9 | 9 | 0.177738 | 12 | 12 | 0.210806 |
| 2 | 84743579..85046713 | DNAH6 | 15.67769 | 7.92E-08 | 0 | 0 | 0 | 1 | 1 | 0.005198 | 1 | 1 | 0.004437 | 8 | 8 | 0.053572 | 13 | 13 | 0.066358 | 10 | 10 | 0.045406 |
| 6 | 26055968..26056699 | HIST1H1C | 14.95469 | 6.36E-60 | 278 | 278 | 26.45031 | 204 | 204 | 19.57576 | 259 | 259 | 21.21564 | 2418 | 2418 | 298.9334 | 3291 | 3291 | 310.1365 | 3534 | 3534 | 296.2482 |
| 1 | 149813505..149814478 | HIST2H2AA3 | 14.90566 | 8.8E-120 | 20 | 60 | 4.290317 | 26 | 59 | 4.254931 | 27 | 53 | 3.262754 | 238 | 548 | 50.91559 | 327 | 748 | 52.97595 | 343 | 781 | 49.20308 |
| 2 | 149632819..149883273 | KIF5C | 14.00475 | 2.7E-23 | 3 | 3 | 0.022659 | 5 | 5 | 0.038088 | 1 | 1 | 0.006503 | 30 | 31 | 0.304238 | 41 | 42 | 0.314201 | 38 | 38 | 0.252875 |
| 10 | 131633547..131762105 | EBF3 | 13.97649 | 0.001322 | 0 | 0 | 0 | 0 | 0 | 0 | 1 | 1 | 0.01297 | 4 | 4 | 0.078301 | 8 | 8 | 0.119372 | 4 | 4 | 0.053093 |
| 8 | 28351729..28431775 | FZD3 | 13.40346 | 3.05E-18 | 1 | 1 | 0.005058 | 3 | 3 | 0.015303 | 3 | 3 | 0.013063 | 24 | 24 | 0.157727 | 27 | 27 | 0.135259 | 31 | 31 | 0.138143 |
| 19 | 2096380..2099592 | IZUMO4 | 13.23408 | 1E-100 | 12 | 14 | 0.346006 | 14 | 14 | 0.348969 | 15 | 16 | 0.340445 | 117 | 122 | 3.917852 | 159 | 165 | 4.039049 | 179 | 187 | 4.071935 |
| 6 | 26156559..26157343 | HIST1H1E | 13.18356 | 1.74E-06 | 1 | 1 | 0.088721 | 0 | 0 | 0 | 1 | 1 | 0.076383 | 9 | 9 | 1.037533 | 6 | 6 | 0.527251 | 11 | 11 | 0.859851 |
| 17 | 45331212..45421658 | ITGB3_1 | 13.15652 | 1.27E-69 | 96 | 189 | 2.679243 | 110 | 197 | 2.816559 | 140 | 238 | 2.904676 | 1029 | 1805 | 33.24755 | 1310 | 2340 | 32.85528 | 1431 | 2596 | 32.42337 |
| 13 | 92050929..93519490 | GPC5 | 13.12306 | 2.27E-05 | 2 | 2 | 0.046139 | 0 | 0 | 0 | 0 | 0 | 0 | 3 | 3 | 0.089926 | 10 | 10 | 0.228493 | 13 | 13 | 0.264229 |
| 3 | 139654027..140296239 | CLSTN2 | 12.91373 | 3.26E-17 | 0 | 0 | 0 | 2 | 2 | 0.009625 | 5 | 5 | 0.02054 | 22 | 22 | 0.136401 | 25 | 27 | 0.127605 | 32 | 33 | 0.138733 |
| 13 | 72012098..72441330 | DACH1 | 12.30978 | 3.36E-32 | 8 | 8 | 0.103275 | 7 | 7 | 0.091139 | 1 | 1 | 0.011114 | 53 | 53 | 0.889024 | 53 | 53 | 0.677674 | 61 | 61 | 0.693807 |
| 11 | 45670427..45687172 | CHST1 | 12.27257 | 0.004281 | 1 | 1 | 0.020025 | 0 | 0 | 0 | 0 | 0 | 0 | 6 | 6 | 0.156117 | 3 | 3 | 0.059501 | 5 | 5 | 0.088215 |

| 16 | 1383602..1399439 | BAIAP3 | 12.25112 | 3.92E-97 | 15 | 15 | 0.170062 | 11 | 11 | 0.12578 | 18 | 18 | 0.175695 | 123 | 123 | 1.811982 | 149 | 151 | 1.695636 | 179 | 179 | 1.788022 |
| --- | --- | --- | --- | --- | --- | --- | --- | --- | --- | --- | --- | --- | --- | --- | --- | --- | --- | --- | --- | --- | --- | --- |
| 15 | 82722223..82731338 | GOLGA6L9 | 12.14446 | 7.38E-05 | 0 | 0 | 0 | 2 | 18 | 0.290258 | 0 | 43 | 0.5919 | 6 | 44 | 0.914101 | 4 | 50 | 0.791805 | 14 | 60 | 0.845208 |
| 4 | 139085251..139163503 | SLC7A11 | 12.11785 | 2.7E-156 | 60 | 148 | 1.068702 | 50 | 156 | 1.136114 | 69 | 236 | 1.467159 | 434 | 1506 | 14.13032 | 663 | 2079 | 14.86923 | 718 | 2109 | 13.41759 |
| 1 | 120143963..120151873 | HSD3BP5 | 12.01365 | 3.64E-05 | 1 | 1 | 0.061525 | 0 | 0 | 0 | 1 | 1 | 0.052969 | 0 | 2 | 0.159887 | 11 | 12 | 0.731259 | 13 | 14 | 0.758895 |
| 19 | 49468558..49470135 | FTL | 11.99184 | 5.9E-121 | 43980 | 46603 | 3696.719 | 45477 | 47688 | 3815.171 | 54024 | 56682 | 3870.955 | 365265 | 382543 | 39428.93 | 489885 | 513325 | 40330.54 | 580528 | 609841 | 42620.87 |
| 6 | 26124373..26139344 | HIST1H2AC | 11.94848 | 3.21E-78 | 215 | 215 | 8.977172 | 210 | 210 | 8.84347 | 270 | 270 | 9.705886 | 1916 | 1916 | 103.951 | 2268 | 2268 | 93.79574 | 2688 | 2688 | 98.88569 |
| 6 | 27834570..27835359 | HIST1H1B | 11.78468 | 1.93E-07 | 0 | 0 | 0 | 2 | 2 | 0.177829 | 1 | 1 | 0.0759 | 9 | 9 | 1.030967 | 12 | 12 | 1.047829 | 12 | 12 | 0.932083 |
| 14 | 75745477..75748933 | FOS | 11.70339 | 9.1E-106 | 28 | 28 | 0.602252 | 15 | 15 | 0.325397 | 20 | 20 | 0.370357 | 143 | 143 | 3.996579 | 217 | 217 | 4.622948 | 261 | 261 | 4.946112 |
| 19 | 18367908..18385319 | KIAA1683 | 11.66272 | 9E-140 | 38 | 38 | 0.570255 | 26 | 26 | 0.393515 | 32 | 32 | 0.413434 | 251 | 251 | 4.894309 | 312 | 312 | 4.637449 | 371 | 371 | 4.905266 |
| 7 | 87133175..87342611 | ABCB1 | 11.46123 | 5.1E-113 | 26 | 26 | 0.326153 | 20 | 20 | 0.253035 | 36 | 37 | 0.399595 | 199 | 201 | 3.276241 | 299 | 302 | 3.752266 | 285 | 288 | 3.183049 |
| X | 153067621..153096020 | PDZD4 | 11.45079 | 3.65E-07 | 1 | 1 | 0.015897 | 1 | 1 | 0.016033 | 1 | 1 | 0.013687 | 11 | 11 | 0.227221 | 12 | 12 | 0.188949 | 9 | 9 | 0.126058 |
| 2 | 233470767..233547491 | EFHD1 | 11.40021 | 0.007618 | 1 | 1 | 0.02282 | 0 | 0 | 0 | 0 | 0 | 0 | 4 | 4 | 0.118605 | 3 | 3 | 0.067807 | 6 | 6 | 0.120633 |
| 1 | 197170592..197447585 | CRB1 | 11.39882 | 3.9E-07 | 0 | 0 | 0 | 2 | 2 | 0.010752 | 1 | 1 | 0.004589 | 6 | 6 | 0.041556 | 9 | 9 | 0.047516 | 17 | 17 | 0.079837 |
| 10 | 46737612..46761205 | BMS1P1 | 11.39599 | 0.00764 | 0 | 12 | 0.19257 | 0 | 15 | 0.242773 | 1 | 16 | 0.221054 | 3 | 11 | 0.229368 | 3 | 32 | 0.508623 | 7 | 50 | 0.706937 |
| 19 | 9434850..9493293 | ZNF559-ZNF177 | 11.39559 | 0.007631 | 0 | 1 | 0.016299 | 0 | 2 | 0.032877 | 1 | 3 | 0.042097 | 2 | 9 | 0.190607 | 6 | 16 | 0.258299 | 5 | 5 | 0.071802 |
| 4 | 53588785..53617807 | ERVMER34-1 | 11.36789 | 0.013935 | 0 | 0 | 0 | 0 | 0 | 0 | 1 | 1 | 0.014707 | 0 | 0 | 0 | 6 | 6 | 0.101519 | 7 | 7 | 0.105356 |
| 8 | 10463859..10569697 | RP1L1 | 11.08635 | 6.17E-16 | 3 | 3 | 0.023526 | 2 | 2 | 0.015819 | 3 | 3 | 0.020255 | 21 | 21 | 0.213987 | 28 | 28 | 0.217486 | 28 | 28 | 0.193462 |
| 4 | 74702214..74714781 | CXCL6 | 10.83025 | 1.83E-11 | 1 | 1 | 0.031904 | 5 | 5 | 0.160885 | 0 | 0 | 0 | 22 | 22 | 0.912007 | 19 | 19 | 0.600394 | 16 | 16 | 0.449745 |
| 6 | 132269316..132272513 | CTGF | 10.69609 | 1.69E-68 | 1249 | 1623 | 48.32651 | 1546 | 1841 | 55.287 | 1768 | 2056 | 52.70604 | 10790 | 12438 | 481.2265 | 14163 | 16561 | 488.4189 | 15458 | 18499 | 485.3089 |
| 12 | 1675159..1703331 | FBXL14 | 10.67205 | 6.48E-05 | 0 | 99 | 3.014853 | 1 | 79 | 2.426389 | 1 | 103 | 2.700465 | 6 | 157 | 6.212447 | 6 | 159 | 4.795866 | 9 | 201 | 5.392997 |
| 6 | 125230239..125284185 | RP11-510H23.1 | 10.63698 | 5.65E-13 | 2 | 3 | 0.046359 | 4 | 4 | 0.062341 | 1 | 2 | 0.026608 | 20 | 21 | 0.421659 | 23 | 24 | 0.367333 | 22 | 23 | 0.313141 |
| 12 | 57345219..57353158 | RDH16 | 10.56019 | 0.013607 | 0 | 0 | 0 | 0 | 0 | 0 | 1 | 1 | 0.01733 | 4 | 4 | 0.10462 | 5 | 5 | 0.099685 | 3 | 3 | 0.053204 |
| 6 | 27833034..27833606 | HIST1H2AL | 10.49932 | 0.025108 | 0 | 0 | 0 | 0 | 0 | 0 | 1 | 1 | 0.104644 | 0 | 0 | 0 | 3 | 3 | 0.361163 | 9 | 9 | 0.963803 |
| 6 | 27100832..27103070 | HIST1H2AG | 10.42454 | 8.8E-113 | 24 | 24 | 0.746542 | 25 | 25 | 0.784306 | 29 | 29 | 0.776625 | 154 | 154 | 6.224376 | 253 | 253 | 7.794756 | 276 | 280 | 7.673689 |
| 3 | 129120164..129147494 | EFCAB12 | 10.39173 | 1.34E-11 | 2 | 2 | 0.017883 | 1 | 1 | 0.009018 | 3 | 3 | 0.023094 | 12 | 12 | 0.139421 | 20 | 20 | 0.177127 | 23 | 23 | 0.181195 |
| 5 | 14581884..14615116 | FAM105A | 10.3633 | 4.33E-33 | 9 | 9 | 0.153857 | 7 | 7 | 0.120691 | 4 | 4 | 0.058872 | 53 | 53 | 1.177292 | 56 | 56 | 0.948207 | 66 | 66 | 0.994084 |
| 6 | 26217165..26217711 | HIST1H2AE | 10.33684 | 1.91E-29 | 8 | 8 | 1.018591 | 4 | 4 | 0.513656 | 6 | 6 | 0.657705 | 36 | 36 | 5.955858 | 58 | 58 | 7.314368 | 64 | 64 | 7.179478 |
| 20 | 5892076..5906007 | CHGB | 10.29713 | 3.21E-12 | 2 | 2 | 0.030715 | 5 | 5 | 0.077445 | 0 | 0 | 0 | 19 | 19 | 0.379145 | 18 | 18 | 0.273799 | 26 | 26 | 0.3518 |
| 9 | 113006091..113018920 | TXN | 10.19608 | 2.51E-93 | 1273 | 1273 | 77.63533 | 1434 | 1434 | 88.20283 | 1756 | 1759 | 92.35644 | 10130 | 10134 | 803.0526 | 13010 | 13014 | 786.1055 | 14501 | 14509 | 779.5996 |
| 6 | 27806323..27823487 | HIST1H2BN | 10.17021 | 1.78E-15 | 1 | 1 | 0.01633 | 3 | 3 | 0.049409 | 5 | 5 | 0.070294 | 20 | 20 | 0.424366 | 33 | 33 | 0.533742 | 26 | 27 | 0.388459 |
| 2 | 239146908..239149303 | HES6 | 10.11887 | 6.79E-55 | 14 | 50 | 1.709528 | 12 | 43 | 1.482781 | 8 | 55 | 1.618971 | 86 | 263 | 11.68406 | 100 | 338 | 11.44621 | 102 | 312 | 9.398614 |
| 19 | 51014857..51017947 | ASPDH | 9.966912 | 9.69E-14 | 1 | 1 | 0.042133 | 1 | 1 | 0.042494 | 6 | 6 | 0.217644 | 23 | 23 | 1.259169 | 18 | 18 | 0.751166 | 28 | 28 | 1.039406 |
| 5 | 114460459..114516243 | TRIM36 | 9.83528 | 1.48E-06 | 0 | 0 | 0 | 0 | 0 | 0 | 4 | 4 | 0.039235 | 5 | 5 | 0.074019 | 8 | 8 | 0.090276 | 23 | 23 | 0.230873 |
| 1 | 42846466..42888249 | RIMKLA | 9.715747 | 0.024439 | 1 | 1 | 0.007755 | 0 | 0 | 0 | 0 | 0 | 0 | 6 | 6 | 0.060458 | 2 | 2 | 0.015362 | 3 | 3 | 0.020497 |
| 12 | 10378657..10469850 | KLRD1 | 9.675063 | 0.000229 | 1 | 1 | 0.013778 | 0 | 0 | 0 | 1 | 1 | 0.011862 | 4 | 4 | 0.071609 | 11 | 11 | 0.150109 | 4 | 4 | 0.048556 |
| 6 | 27861203..27861669 | HIST1H2BO | 9.658556 | 1.21E-08 | 0 | 0 | 0 | 1 | 1 | 0.150412 | 4 | 4 | 0.513583 | 11 | 11 | 2.131596 | 15 | 15 | 2.215698 | 17 | 17 | 2.233738 |
| 20 | 30193086..30194318 | ID1 | 9.178375 | 5.4E-164 | 66 | 66 | 3.728018 | 51 | 51 | 2.905404 | 70 | 70 | 3.404101 | 396 | 396 | 29.0644 | 516 | 516 | 28.8684 | 510 | 510 | 25.38092 |
| 1 | 161016736..161039760 | ARHGAP30 | 9.172672 | 0.000394 | 0 | 0 | 0 | 1 | 1 | 0.013871 | 1 | 1 | 0.011841 | 5 | 5 | 0.089352 | 6 | 6 | 0.081732 | 7 | 7 | 0.084821 |
| 19 | 1248552..1259142 | MIDN | 9.167124 | 2.02E-55 | 1222 | 1222 | 18.93384 | 1141 | 1141 | 17.83017 | 1203 | 1203 | 16.04735 | 6977 | 6977 | 140.465 | 9832 | 9832 | 150.8858 | 10596 | 10596 | 144.648 |
| 16 | 28303840..28335170 | SBK1 | 9.134904 | 2.12E-13 | 2 | 2 | 0.027903 | 5 | 5 | 0.070355 | 2 | 2 | 0.024023 | 22 | 22 | 0.39882 | 17 | 17 | 0.234915 | 32 | 32 | 0.393347 |
| 14 | 93799565..94174222 | UNC79 | 9.022101 | 4.86E-11 | 2 | 2 | 0.011132 | 0 | 0 | 0 | 5 | 5 | 0.023959 | 18 | 18 | 0.130179 | 17 | 17 | 0.093718 | 20 | 20 | 0.098077 |
| 8 | 143692405..143696833 | ARC | 8.94465 | 0.000173 | 3 | 3 | 0.052352 | 0 | 0 | 0 | 0 | 0 | 0 | 6 | 6 | 0.13605 | 8 | 8 | 0.138275 | 11 | 11 | 0.169126 |
| 1 | 149825607..149832714 | HIST2H4B | 8.926198 | 1.68E-08 | 4 | 38 | 1.416027 | 4 | 50 | 1.879144 | 0 | 32 | 1.026616 | 10 | 368 | 17.81836 | 15 | 744 | 27.45995 | 39 | 1411 | 46.32527 |
| 22 | 38616385..38617120 | AL021977.1 | 8.834485 | 0.042588 | 1 | 2 | 0.19591 | 0 | 0 | 0 | 0 | 0 | 0 | 2 | 3 | 0.381839 | 5 | 5 | 0.485106 | 3 | 4 | 0.345216 |
| 5 | 17354019..17355008 | CTD-2139B15.2 | 8.832112 | 0.042514 | 1 | 24 | 1.927921 | 0 | 15 | 1.215267 | 0 | 23 | 1.590656 | 2 | 49 | 5.114535 | 4 | 77 | 6.126434 | 4 | 67 | 4.741939 |
| 15 | 76020011..76030964 | DNM1P35 | 8.831692 | 0.042815 | 1 | 1 | 0.021846 | 0 | 1 | 0.022033 | 0 | 0 | 0 | 3 | 3 | 0.085159 | 1 | 1 | 0.021638 | 6 | 7 | 0.134735 |
| 7 | 27180671..27183287 | HOXA5 | 8.820668 | 8.5E-129 | 53 | 284 | 11.58729 | 52 | 306 | 12.59179 | 59 | 331 | 11.62685 | 320 | 1624 | 86.09575 | 418 | 2277 | 92.01648 | 466 | 2787 | 100.1852 |
| 1 | 26856252..26901521 | RPS6KA1 | 8.803088 | 5.14E-54 | 12 | 12 | 0.142038 | 15 | 15 | 0.179068 | 13 | 13 | 0.132476 | 70 | 70 | 1.0766 | 103 | 103 | 1.207538 | 123 | 123 | 1.282722 |
| 16 | 3062457..3064506 | CLDN9 | 8.675683 | 0.003432 | 2 | 2 | 0.067947 | 0 | 0 | 0 | 0 | 0 | 0 | 6 | 6 | 0.264866 | 5 | 5 | 0.168249 | 6 | 6 | 0.179596 |

| 1 | 76540404..77100286 | ST6GALNAC3 | 8.520629 | 4.69E-09 | 0 | 0 | 0 | 1 | 1 | 0.009722 | 5 | 5 | 0.041495 | 11 | 11 | 0.137779 | 12 | 12 | 0.114572 | 22 | 22 | 0.186847 |
| --- | --- | --- | --- | --- | --- | --- | --- | --- | --- | --- | --- | --- | --- | --- | --- | --- | --- | --- | --- | --- | --- | --- |
| 12 | 104609557..104744061 | TXNRD1 | 8.436854 | 2.25E-67 | 7933 | 7933 | 82.6358 | 8689 | 8689 | 91.28573 | 11173 | 11173 | 100.2007 | 53378 | 53378 | 722.4788 | 68244 | 68244 | 704.0998 | 71247 | 71247 | 653.8836 |
| 17 | 42298769..42301078 | RP5-882C2.2 | 8.309745 | 6.63E-06 | 2 | 2 | 0.244802 | 1 | 2 | 0.246898 | 1 | 1 | 0.105379 | 12 | 13 | 2.06757 | 8 | 10 | 1.212338 | 10 | 11 | 1.186262 |
| 16 | 56642111..56643409 | MT2A | 8.290487 | 9.08E-67 | 4927 | 4928 | 264.2157 | 4518 | 4527 | 244.794 | 5093 | 5096 | 235.2273 | 26538 | 26565 | 1850.674 | 34845 | 34876 | 1852.054 | 39272 | 39298 | 1856.357 |
| X | 30671476..30748725 | GK | 8.274269 | 5.3E-187 | 154 | 205 | 3.165032 | 208 | 264 | 4.11084 | 263 | 355 | 4.718707 | 1169 | 1541 | 30.91427 | 1492 | 1980 | 30.27809 | 1602 | 2099 | 28.55222 |
| 11 | 107461817..107537505 | ELMOD1 | 8.255499 | 5.03E-05 | 4 | 4 | 0.047573 | 0 | 0 | 0 | 0 | 0 | 0 | 4 | 4 | 0.061814 | 11 | 11 | 0.129577 | 15 | 15 | 0.157178 |
| 4 | 100871163..101116256 | RP11-15B17.1 | 8.237528 | 0.000507 | 2 | 2 | 0.081267 | 1 | 1 | 0.040982 | 0 | 0 | 0 | 5 | 5 | 0.263991 | 8 | 8 | 0.32197 | 10 | 10 | 0.358005 |
| 1 | 149822643..149823191 | HIST2H2AA4 | 8.172402 | 0.001306 | 0 | 187 | 23.72282 | 0 | 139 | 17.78451 | 2 | 191 | 20.86068 | 4 | 2132 | 351.4342 | 5 | 2696 | 338.7534 | 7 | 3014 | 336.8768 |
| 16 | 89987800..90005169 | TUBB3_2 | 8.171731 | 2.96E-76 | 203 | 3060 | 106.187 | 210 | 2762 | 96.66645 | 241 | 3211 | 95.93131 | 1228 | 15761 | 710.6661 | 1631 | 21294 | 731.8903 | 1558 | 22465 | 686.8459 |
| 16 | 2546033..2570219 | RP11-20I23.1 | 8.166695 | 0.005947 | 0 | 0 | 0 | 1 | 5 | 0.180665 | 1 | 8 | 0.246752 | 4 | 28 | 1.30344 | 4 | 25 | 0.887115 | 8 | 53 | 1.672938 |
| 17 | 26083792..26127525 | NOS2 | 8.154005 | 0.006016 | 0 | 0 | 0 | 1 | 1 | 0.016821 | 1 | 1 | 0.014358 | 2 | 2 | 0.043341 | 5 | 5 | 0.082593 | 9 | 9 | 0.132246 |
| 21 | 38580804..38594037 | DSCR9 | 8.081334 | 0.013799 | 1 | 1 | 0.036637 | 0 | 0 | 0 | 1 | 1 | 0.031542 | 2 | 3 | 0.142813 | 1 | 1 | 0.036287 | 13 | 13 | 0.419625 |
| 3 | 134316643..134979309 | EPHB1 | 8.063727 | 5.4E-106 | 28 | 28 | 0.280347 | 23 | 23 | 0.232256 | 34 | 34 | 0.29308 | 150 | 150 | 1.951466 | 207 | 207 | 2.052801 | 214 | 214 | 1.887793 |
| 2 | 192813769..193060435 | TMEFF2 | 8.019778 | 2.41E-12 | 4 | 4 | 0.042006 | 2 | 3 | 0.031774 | 4 | 5 | 0.045206 | 17 | 19 | 0.259262 | 23 | 26 | 0.270436 | 29 | 31 | 0.286825 |
| 16 | 56659387..56661024 | MT1E | 7.961906 | 3.18E-66 | 487 | 490 | 32.43975 | 572 | 576 | 38.45973 | 650 | 658 | 37.504 | 3066 | 3091 | 265.8964 | 3977 | 4004 | 262.5515 | 4218 | 4252 | 248.0149 |
| 16 | 28889726..28915830 | ATP2A1 | 7.757487 | 2.18E-15 | 7 | 7 | 0.106284 | 1 | 1 | 0.015313 | 5 | 6 | 0.078431 | 23 | 24 | 0.473491 | 29 | 29 | 0.436119 | 34 | 34 | 0.454831 |
| 4 | 7967039..8160559 | ABLIM2 | 7.697567 | 7.23E-10 | 2 | 2 | 0.023031 | 7 | 7 | 0.081299 | 0 | 0 | 0 | 14 | 14 | 0.209481 | 17 | 17 | 0.193898 | 29 | 29 | 0.29423 |
| 9 | 34621376..34628104 | ARID3C | 7.675444 | 0.010201 | 0 | 0 | 0 | 1 | 1 | 0.049782 | 1 | 1 | 0.042495 | 5 | 5 | 0.32068 | 4 | 4 | 0.195555 | 6 | 6 | 0.26093 |
| 3 | 52255096..52273183 | TLR9_1 | 7.671632 | 0.010222 | 2 | 4 | 0.056819 | 0 | 2 | 0.028653 | 0 | 1 | 0.012229 | 5 | 22 | 0.40606 | 4 | 35 | 0.492427 | 6 | 48 | 0.60073 |
| 1 | 38509523..38512450 | POU3F1 | 7.649148 | 0.017612 | 2 | 2 | 0.047573 | 0 | 0 | 0 | 0 | 0 | 0 | 1 | 1 | 0.030907 | 7 | 7 | 0.164916 | 7 | 7 | 0.146699 |
| 1 | 186640923..186649559 | PTGS2 | 7.618365 | 1.98E-52 | 6 | 6 | 0.079309 | 22 | 22 | 0.293288 | 30 | 30 | 0.341398 | 104 | 104 | 1.786217 | 129 | 129 | 1.688875 | 134 | 134 | 1.560547 |
| 19 | 51020149..51071302 | LRRC4B | 7.547613 | 2.95E-17 | 5 | 5 | 0.111577 | 3 | 3 | 0.067519 | 8 | 8 | 0.153696 | 34 | 34 | 0.985858 | 34 | 34 | 0.751487 | 34 | 34 | 0.668475 |
| 10 | 70587298..70655188 | STOX1 | 7.538215 | 0.000409 | 2 | 2 | 0.039039 | 0 | 0 | 0 | 1 | 1 | 0.016805 | 7 | 7 | 0.177543 | 2 | 2 | 0.038667 | 12 | 12 | 0.206375 |
| 1 | 110693108..110744824 | SLC6A17 | 7.531658 | 4.89E-08 | 1 | 1 | 0.010483 | 4 | 4 | 0.042289 | 2 | 2 | 0.01805 | 11 | 12 | 0.163448 | 18 | 19 | 0.19727 | 17 | 17 | 0.157007 |
| 16 | 69743777..69744486 | CTD-2033A16.1 | 7.522663 | 3.52E-13 | 4 | 6 | 0.726742 | 4 | 5 | 0.610804 | 5 | 6 | 0.625678 | 24 | 37 | 5.823218 | 38 | 53 | 6.358346 | 21 | 33 | 3.521651 |
| 16 | 87336482..87367879 | RP11-178L8.4 | 7.504119 | 1.01E-06 | 0 | 14 | 1.023133 | 2 | 9 | 0.66336 | 4 | 9 | 0.566262 | 19 | 33 | 3.133648 | 8 | 25 | 1.809603 | 12 | 52 | 3.348195 |
| 19 | 5558178..5568045 | TINCR | 7.470477 | 3.57E-05 | 2 | 2 | 0.035488 | 1 | 1 | 0.017896 | 1 | 1 | 0.015277 | 6 | 6 | 0.138338 | 14 | 15 | 0.263626 | 7 | 7 | 0.109436 |
| 11 | 1768897..1780281 | RP11-295K3.1 | 7.381595 | 2.67E-33 | 10 | 23 | 1.410089 | 9 | 16 | 0.98933 | 15 | 24 | 1.266778 | 62 | 129 | 10.27639 | 66 | 158 | 9.594335 | 82 | 221 | 11.93752 |
| 4 | 1795034..1810599 | FGFR3 | 7.30896 | 2.25E-20 | 10 | 10 | 0.144076 | 2 | 2 | 0.029062 | 8 | 8 | 0.099232 | 37 | 37 | 0.692667 | 48 | 48 | 0.684969 | 38 | 38 | 0.482367 |
| 7 | 45613739..45762715 | ADCY1 | 7.196702 | 2.61E-28 | 9 | 9 | 0.046328 | 9 | 9 | 0.046724 | 15 | 15 | 0.066475 | 41 | 41 | 0.27423 | 82 | 82 | 0.418073 | 77 | 77 | 0.349215 |
| X | 48431482..48433275 | AC115618.1 | 7.189824 | 0.000647 | 0 | 3 | 0.116465 | 2 | 7 | 0.274079 | 1 | 3 | 0.100269 | 6 | 9 | 0.453993 | 6 | 7 | 0.269161 | 8 | 9 | 0.307837 |
| 9 | 17579080..17797127 | SH3GL2 | 7.166519 | 0.004261 | 0 | 0 | 0 | 0 | 0 | 0 | 2 | 2 | 0.041799 | 2 | 2 | 0.063085 | 6 | 6 | 0.144264 | 6 | 6 | 0.128328 |
| 2 | 135493034..135676280 | CCNT2-AS1 | 7.107811 | 1.2E-09 | 2 | 4 | 0.232541 | 4 | 11 | 0.644964 | 3 | 10 | 0.500508 | 19 | 27 | 2.039558 | 20 | 23 | 1.324363 | 16 | 23 | 1.17807 |
| 7 | 27135266..27139884 | HOTAIRM1 | 7.090248 | 4.6E-109 | 30 | 30 | 1.70562 | 42 | 42 | 2.408311 | 36 | 36 | 1.762113 | 167 | 167 | 12.337 | 215 | 215 | 12.10705 | 257 | 257 | 12.87352 |
| 2 | 54950636..55199157 | EML6 | 7.083038 | 5.26E-27 | 7 | 7 | 0.033804 | 7 | 7 | 0.034094 | 15 | 15 | 0.062364 | 52 | 52 | 0.326292 | 53 | 53 | 0.253505 | 67 | 67 | 0.285069 |
| 17 | 79858621..79860781 | NPB | 7.07343 | 4.28E-23 | 6 | 16 | 0.515659 | 7 | 11 | 0.35755 | 11 | 24 | 0.665923 | 35 | 64 | 2.680121 | 53 | 99 | 3.160214 | 55 | 110 | 3.123476 |
| 5 | 10441636..10472141 | ROPN1L | 7.062953 | 3.89E-08 | 5 | 5 | 0.191651 | 2 | 2 | 0.077317 | 1 | 1 | 0.033 | 13 | 13 | 0.647467 | 16 | 16 | 0.607437 | 20 | 20 | 0.675422 |
| 18 | 29704840..30050447 | GAREM | 7.047742 | 5.88E-96 | 27 | 29 | 0.266879 | 29 | 32 | 0.297008 | 37 | 43 | 0.340686 | 147 | 175 | 2.0926 | 202 | 231 | 2.105557 | 196 | 245 | 1.986485 |
| 6 | 16129356..16148479 | MYLIP | 7.042074 | 6.7E-92 | 35 | 35 | 0.803698 | 21 | 21 | 0.486347 | 33 | 33 | 0.652393 | 147 | 147 | 4.386055 | 184 | 184 | 4.184866 | 190 | 190 | 3.843983 |
| 16 | 69740899..69760854 | NQO1 | 6.986792 | 2.26E-78 | 1926 | 2024 | 43.32016 | 2050 | 2149 | 46.38935 | 2603 | 2752 | 50.71055 | 10158 | 10865 | 302.1631 | 13247 | 14241 | 301.8972 | 14621 | 15765 | 297.2875 |
| 11 | 65190245..65213011 | NEAT1 | 6.975079 | 4.1E-245 | 3831 | 3831 | 152.9022 | 3776 | 3776 | 151.9973 | 3516 | 3516 | 120.815 | 17714 | 17714 | 918.6507 | 22586 | 22586 | 892.8531 | 24647 | 24647 | 866.7002 |
| 6 | 27777842..27778314 | HIST1H3H | 6.961525 | 1.86E-15 | 4 | 4 | 0.588974 | 5 | 5 | 0.74252 | 8 | 8 | 1.014136 | 32 | 32 | 6.122348 | 24 | 24 | 3.500146 | 44 | 44 | 5.708103 |
| 19 | 33210659..33320483 | TDRD12 | 6.959206 | 2.86E-05 | 2 | 2 | 0.019876 | 1 | 1 | 0.010023 | 2 | 2 | 0.017112 | 4 | 4 | 0.051653 | 12 | 12 | 0.11812 | 15 | 15 | 0.13134 |
| 1 | 45976708..45988719 | PRDX1 | 6.942157 | 1.4E-218 | 1693 | 1696 | 77.60833 | 2007 | 2009 | 92.71815 | 2693 | 2697 | 106.2512 | 9704 | 9712 | 577.4617 | 12745 | 12759 | 578.2799 | 14110 | 14131 | 569.7161 |
| 6 | 19837617..19840915 | ID4 | 6.920121 | 1.53E-48 | 17 | 38 | 1.129076 | 14 | 25 | 0.749173 | 22 | 42 | 1.074383 | 85 | 169 | 6.524666 | 104 | 239 | 7.03358 | 117 | 250 | 6.544593 |
| 13 | 66876967..67804468 | PCDH9 | 6.918515 | 9.67E-95 | 24 | 24 | 0.242247 | 33 | 33 | 0.335942 | 34 | 34 | 0.295459 | 143 | 146 | 1.914842 | 184 | 190 | 1.899506 | 197 | 203 | 1.805291 |
| 17 | 79993012..79995608 | DCXR | 6.899536 | 4.33E-50 | 254 | 254 | 9.300801 | 260 | 260 | 9.602013 | 280 | 280 | 8.827038 | 1248 | 1248 | 59.37905 | 1603 | 1603 | 58.13787 | 1694 | 1694 | 54.65163 |
| 2 | 230222345..230579274 | DNER | 6.894944 | 9.79E-42 | 14 | 14 | 0.247788 | 10 | 10 | 0.178507 | 23 | 23 | 0.35047 | 76 | 76 | 1.747825 | 99 | 99 | 1.735508 | 95 | 95 | 1.481423 |
| 4 | 62066976..62944053 | LPHN3 | 6.839277 | 0.001135 | 0 | 0 | 0 | 1 | 1 | 0.005021 | 2 | 2 | 0.008571 | 5 | 9 | 0.058213 | 8 | 8 | 0.039444 | 6 | 6 | 0.026315 |

| 11 | 1753640..1771821 | IFITM10 | 6.837888 | 8.03E-59 | 32 | 34 | 0.494977 | 23 | 28 | 0.411118 | 25 | 26 | 0.325874 | 105 | 114 | 2.156467 | 151 | 157 | 2.263834 | 205 | 229 | 2.937275 |
| --- | --- | --- | --- | --- | --- | --- | --- | --- | --- | --- | --- | --- | --- | --- | --- | --- | --- | --- | --- | --- | --- | --- |
| 19 | 3539152..3544028 | C19orf71 | 6.816867 | 0.004265 | 2 | 21 | 2.169984 | 1 | 24 | 2.501214 | 0 | 32 | 2.846804 | 2 | 25 | 3.356675 | 9 | 48 | 4.912669 | 8 | 38 | 3.459585 |
| 9 | 115249127..115431677 | KIAA1958 | 6.783889 | 1.4E-64 | 28 | 32 | 0.169882 | 23 | 23 | 0.123148 | 25 | 27 | 0.123404 | 100 | 103 | 0.710503 | 163 | 165 | 0.8676 | 169 | 171 | 0.799826 |
| 7 | 93514709..93520303 | TFPI2 | 6.760404 | 2.7E-150 | 56 | 68 | 1.778422 | 50 | 67 | 1.767271 | 78 | 109 | 2.454273 | 258 | 349 | 11.85997 | 367 | 475 | 12.30435 | 411 | 525 | 12.0973 |
| 19 | 41430124..41456565 | CYP2B7P | 6.730375 | 5.38E-05 | 2 | 3 | 0.051412 | 1 | 1 | 0.017284 | 2 | 2 | 0.029508 | 5 | 5 | 0.111339 | 7 | 7 | 0.118818 | 18 | 18 | 0.271781 |
| 19 | 10203014..10213472 | ANGPTL6 | 6.621985 | 0.000401 | 3 | 4 | 0.127733 | 0 | 2 | 0.064413 | 1 | 2 | 0.054985 | 2 | 2 | 0.082986 | 15 | 20 | 0.632573 | 7 | 9 | 0.253214 |
| 17 | 79361930..79364056 | RP11-1055B8.4 | 6.534047 | 3.05E-20 | 9 | 9 | 0.401547 | 6 | 6 | 0.26999 | 9 | 9 | 0.345706 | 35 | 35 | 2.029057 | 48 | 48 | 2.121165 | 49 | 49 | 1.926165 |
| 5 | 660883..693510 | TPPP | 6.468654 | 0.002002 | 1 | 10 | 0.136134 | 1 | 8 | 0.10984 | 1 | 6 | 0.070322 | 2 | 26 | 0.459909 | 8 | 63 | 0.849466 | 8 | 51 | 0.611702 |
| 10 | 6319650..6377944 | RP11-563J2.2 | 6.465411 | 7.18E-06 | 2 | 2 | 0.045137 | 2 | 2 | 0.045523 | 2 | 2 | 0.03886 | 12 | 12 | 0.351896 | 10 | 10 | 0.223532 | 12 | 12 | 0.238608 |
| 21 | 43619799..43717354 | ABCG1 | 6.456937 | 2.79E-19 | 7 | 7 | 0.079609 | 7 | 7 | 0.08029 | 9 | 9 | 0.08812 | 36 | 36 | 0.531981 | 40 | 40 | 0.450569 | 49 | 49 | 0.490977 |
| 1 | 43391052..43424530 | SLC2A1 | 6.438363 | 1.26E-42 | 264 | 264 | 4.369435 | 286 | 286 | 4.774081 | 284 | 284 | 4.046784 | 1191 | 1191 | 25.61328 | 1519 | 1519 | 24.90108 | 1767 | 1767 | 25.76683 |
| X | 102317579..102319168 | BEX1 | 6.397564 | 0.000322 | 3 | 3 | 0.241827 | 0 | 0 | 0 | 1 | 1 | 0.069399 | 9 | 9 | 0.942666 | 10 | 10 | 0.798403 | 4 | 4 | 0.284084 |
| 1 | 162039564..162353321 | NOS1AP | 6.397196 | 1.17E-21 | 12 | 14 | 0.115404 | 3 | 5 | 0.041568 | 11 | 17 | 0.120645 | 34 | 39 | 0.417723 | 51 | 52 | 0.424555 | 55 | 70 | 0.508385 |
| 22 | 38203912..38213183 | GCAT | 6.349448 | 3E-134 | 138 | 138 | 4.572392 | 83 | 83 | 2.773606 | 157 | 157 | 4.478519 | 517 | 518 | 22.3011 | 703 | 704 | 23.10341 | 771 | 771 | 22.50722 |
| 11 | 823634..832883 | AP006621.8 | 6.238485 | 1.09E-10 | 4 | 4 | 0.351748 | 7 | 9 | 0.798209 | 2 | 2 | 0.151416 | 23 | 27 | 3.08509 | 21 | 24 | 2.090365 | 25 | 29 | 2.246845 |
| 19 | 1491165..1497926 | REEP6 | 6.222875 | 4.33E-48 | 25 | 25 | 0.857711 | 18 | 18 | 0.622839 | 27 | 27 | 0.797508 | 88 | 88 | 3.922978 | 117 | 117 | 3.975813 | 160 | 160 | 4.836422 |
| 4 | 74861359..74864496 | CXCL5 | 6.210056 | 8.22E-07 | 2 | 2 | 0.054883 | 4 | 4 | 0.110705 | 2 | 2 | 0.04725 | 12 | 12 | 0.427877 | 15 | 15 | 0.407695 | 16 | 16 | 0.386838 |
| X | 281725..282586 | LINC00685 | 6.175419 | 5.49E-35 | 22 | 22 | 3.579942 | 13 | 13 | 2.133531 | 12 | 12 | 1.681144 | 66 | 66 | 13.95498 | 81 | 81 | 13.05501 | 96 | 96 | 13.76346 |
| 17 | 45681226..45726786 | RP11-580I16.2 | 6.171017 | 0.013638 | 0 | 0 | 0 | 0 | 0 | 0 | 2 | 2 | 0.096555 | 2 | 2 | 0.145726 | 6 | 6 | 0.333247 | 4 | 4 | 0.197624 |
| 16 | 2285817..2288712 | DNASE1L2 | 6.153184 | 8.96E-10 | 6 | 8 | 0.253951 | 2 | 7 | 0.22411 | 4 | 5 | 0.136647 | 17 | 21 | 0.866187 | 25 | 26 | 0.817472 | 21 | 22 | 0.615299 |
| 4 | 89011416..89152474 | ABCG2 | 6.126358 | 8.02E-18 | 4 | 4 | 0.057464 | 7 | 7 | 0.101423 | 13 | 13 | 0.160786 | 25 | 25 | 0.466666 | 51 | 51 | 0.725678 | 48 | 48 | 0.607546 |
| 3 | 128580156..128590383 | RP11-723O4.2 | 6.103736 | 0.000865 | 2 | 3 | 0.143502 | 0 | 0 | 0 | 2 | 2 | 0.082364 | 5 | 6 | 0.372923 | 9 | 10 | 0.473778 | 8 | 8 | 0.337154 |
| 4 | 3246096..3273465 | MSANTD1 | 6.089359 | 0.000889 | 0 | 0 | 0 | 3 | 3 | 0.0279 | 1 | 1 | 0.007939 | 3 | 3 | 0.035944 | 8 | 8 | 0.073065 | 11 | 11 | 0.089366 |
| 8 | 23699428..23712320 | STC1 | 6.069052 | 6.75E-59 | 149 | 149 | 2.501151 | 141 | 141 | 2.387125 | 173 | 173 | 2.500173 | 589 | 589 | 12.84698 | 827 | 827 | 13.74986 | 927 | 927 | 13.70997 |
| 2 | 5832799..5841516 | SOX11 | 6.065274 | 2.99E-63 | 19 | 25 | 0.199719 | 33 | 40 | 0.322287 | 34 | 50 | 0.343891 | 115 | 167 | 1.73352 | 163 | 201 | 1.590433 | 156 | 204 | 1.435865 |
| 12 | 39943835..40013553 | ABCD2 | 6.047701 | 8.46E-09 | 3 | 3 | 0.033494 | 3 | 3 | 0.033781 | 5 | 5 | 0.048061 | 12 | 12 | 0.174086 | 21 | 21 | 0.232226 | 24 | 24 | 0.236084 |
| 11 | 102706532..102714534 | MMP3 | 5.99885 | 8.6E-154 | 108 | 118 | 4.012815 | 101 | 114 | 3.909978 | 162 | 176 | 5.152882 | 491 | 522 | 23.06586 | 611 | 673 | 22.66842 | 742 | 801 | 23.99953 |
| 2 | 192542794..192561385 | NABP1 | 5.985592 | 6.23E-42 | 785 | 785 | 3.960034 | 957 | 957 | 4.869042 | 1058 | 1058 | 4.594997 | 3722 | 3722 | 24.39707 | 4656 | 4658 | 23.27382 | 5540 | 5541 | 24.62751 |
| 7 | 130561495..130598069 | MIR29A | 5.912603 | 1.56E-07 | 1 | 27 | 0.284098 | 6 | 38 | 0.403265 | 3 | 31 | 0.280826 | 7 | 234 | 3.199283 | 24 | 331 | 3.449624 | 20 | 344 | 3.189087 |
| 19 | 1228286..1238026 | C19orf26 | 5.911139 | 1.3E-213 | 272 | 272 | 4.169877 | 218 | 218 | 3.370647 | 245 | 246 | 3.246832 | 951 | 951 | 18.94379 | 1282 | 1283 | 19.48139 | 1396 | 1398 | 18.88273 |
| 1 | 151104161..151119104 | SEMA6C | 5.873587 | 1.6E-170 | 100 | 100 | 1.206412 | 79 | 79 | 0.961225 | 114 | 114 | 1.184052 | 393 | 393 | 6.16056 | 513 | 513 | 6.129879 | 519 | 519 | 5.516531 |
| 12 | 48099868..48136077 | RP1-197B17.3 | 5.851798 | 0.000943 | 1 | 2 | 0.034615 | 1 | 2 | 0.034912 | 2 | 7 | 0.104306 | 10 | 11 | 0.24738 | 3 | 7 | 0.119999 | 8 | 13 | 0.198237 |
| 19 | 1446300..1473243 | APC2 | 5.838393 | 2.8E-15 | 5 | 36 | 0.198815 | 6 | 35 | 0.194948 | 10 | 37 | 0.175922 | 34 | 138 | 0.990282 | 33 | 172 | 0.940838 | 36 | 178 | 0.866105 |
| 9 | 114312002..114362135 | PTGR1 | 5.815153 | 2.27E-47 | 564 | 634 | 11.86342 | 589 | 672 | 12.68213 | 789 | 893 | 14.38608 | 2430 | 2733 | 66.44961 | 3285 | 3661 | 67.8515 | 3644 | 4055 | 66.85205 |
| 3 | 52467069..52479101 | SEMA3G | 5.776624 | 0.005972 | 0 | 0 | 0 | 1 | 1 | 0.014018 | 2 | 2 | 0.023932 | 5 | 5 | 0.090297 | 3 | 3 | 0.041298 | 8 | 8 | 0.097964 |
| 6 | 27791884..27792257 | HIST1H4J | 5.76897 | 6.23E-15 | 6 | 16 | 2.979515 | 4 | 14 | 2.629395 | 11 | 21 | 3.366783 | 30 | 75 | 18.14759 | 30 | 83 | 15.30885 | 42 | 104 | 17.06326 |
| 4 | 55944644..55991756 | KDR | 5.767926 | 0.019127 | 1 | 1 | 0.011127 | 2 | 2 | 0.022445 | 0 | 0 | 0 | 3 | 4 | 0.057834 | 7 | 8 | 0.08817 | 6 | 6 | 0.058823 |
| 19 | 18718240..18731849 | TMEM59L | 5.757442 | 6.33E-46 | 32 | 32 | 0.848696 | 21 | 21 | 0.561725 | 20 | 20 | 0.45667 | 94 | 94 | 3.239383 | 123 | 123 | 3.231071 | 134 | 134 | 3.131197 |
| X | 153706028..153707596 | LAGE3 | 5.730095 | 3.91E-29 | 149 | 149 | 8.281945 | 132 | 132 | 7.39984 | 156 | 156 | 7.465192 | 570 | 570 | 41.16736 | 715 | 715 | 39.36326 | 794 | 794 | 38.88389 |
| 14 | 60062694..60337684 | RTN1 | 5.696686 | 9.3E-05 | 3 | 3 | 0.033651 | 2 | 2 | 0.022626 | 1 | 1 | 0.009657 | 7 | 7 | 0.102025 | 10 | 10 | 0.1111 | 13 | 13 | 0.128476 |
| 7 | 27132612..27135615 | HOXA1 | 5.646475 | 4.3E-12 | 2 | 8 | 0.219444 | 6 | 7 | 0.193658 | 10 | 12 | 0.283391 | 21 | 24 | 0.855417 | 25 | 35 | 0.950914 | 40 | 43 | 1.039216 |
| 5 | 33424131..33440725 | CTD-2203K17.1 | 5.632635 | 0.000641 | 1 | 1 | 0.129695 | 4 | 4 | 0.523221 | 0 | 0 | 0 | 6 | 6 | 1.011128 | 6 | 6 | 0.770749 | 13 | 13 | 1.485489 |
| 12 | 6646960..6647536 | RP5-940J5.9 | 5.630613 | 1.86E-21 | 51 | 402 | 66.34539 | 33 | 223 | 37.11862 | 40 | 188 | 26.7124 | 129 | 535 | 114.7283 | 284 | 1150 | 187.9843 | 174 | 817 | 118.7982 |
| 19 | 39897453..39900052 | ZFP36 | 5.620626 | 3.73E-95 | 873 | 873 | 30.2493 | 972 | 972 | 33.96798 | 1072 | 1072 | 31.9791 | 3476 | 3476 | 156.4995 | 4480 | 4480 | 153.751 | 5763 | 5763 | 175.9352 |
| 11 | 6452279..6463847 | HPX | 5.600578 | 2.3E-07 | 0 | 0 | 0 | 5 | 5 | 0.096726 | 5 | 5 | 0.082568 | 13 | 13 | 0.324001 | 18 | 18 | 0.341966 | 17 | 17 | 0.287292 |
| 1 | 245132652..245134390 | RP11-156E8.1 | 5.588421 | 0.001685 | 1 | 14 | 0.560694 | 2 | 17 | 0.686671 | 1 | 6 | 0.20688 | 11 | 20 | 1.040782 | 3 | 8 | 0.317341 | 6 | 14 | 0.494002 |
| 10 | 28966271..28971868 | BAMBI | 5.570497 | 1.21E-35 | 23 | 23 | 0.692248 | 13 | 13 | 0.39462 | 25 | 25 | 0.647805 | 62 | 62 | 2.424697 | 105 | 105 | 3.130128 | 118 | 118 | 3.129096 |
| 8 | 70579282..70747299 | SLCO5A1 | 5.553727 | 0.007986 | 1 | 1 | 0.00697 | 3 | 3 | 0.02109 | 0 | 0 | 0 | 7 | 7 | 0.063398 | 2 | 2 | 0.013807 | 11 | 11 | 0.067552 |
| 22 | 22051833..22090123 | YPEL1 | 5.533679 | 2.64E-40 | 15 | 29 | 0.428546 | 27 | 52 | 0.775007 | 33 | 51 | 0.648844 | 93 | 159 | 3.053015 | 103 | 192 | 2.810217 | 150 | 239 | 3.111721 |

| 21 | 33951132..33984591 | AP000275.65 | 5.456914 | 0.005659 | 5 | 7 | 0.475169 | 2 | 9 | 0.616162 | 1 | 2 | 0.116883 | 2 | 5 | 0.441013 | 9 | 16 | 1.075744 | 30 | 46 | 2.751128 |
| --- | --- | --- | --- | --- | --- | --- | --- | --- | --- | --- | --- | --- | --- | --- | --- | --- | --- | --- | --- | --- | --- | --- |
| 8 | 30535583..30585443 | GSR | 5.456573 | 1.12E-56 | 762 | 762 | 16.42029 | 780 | 780 | 16.95207 | 921 | 921 | 17.0866 | 2929 | 2929 | 82.01196 | 4013 | 4013 | 85.65129 | 4223 | 4223 | 80.17703 |
| 6 | 27093676..27100541 | HIST1H2BJ | 5.445311 | 7.39E-14 | 7 | 7 | 0.443203 | 8 | 8 | 0.510854 | 7 | 7 | 0.381569 | 25 | 25 | 2.056726 | 39 | 39 | 2.445727 | 37 | 37 | 2.063998 |
| 9 | 35041092..35045988 | C9orf131 | 5.424681 | 0.031252 | 2 | 2 | 0.036321 | 0 | 0 | 0 | 1 | 1 | 0.015635 | 5 | 5 | 0.117987 | 5 | 5 | 0.089937 | 5 | 5 | 0.080003 |
| 3 | 126061478..126076285 | KLF15 | 5.423573 | 1.77E-44 | 40 | 40 | 0.978176 | 26 | 26 | 0.641258 | 30 | 30 | 0.63161 | 102 | 102 | 3.241077 | 143 | 143 | 3.463635 | 193 | 193 | 4.158317 |
| 11 | 102641234..102651359 | MMP10 | 5.42268 | 0.031347 | 0 | 1 | 0.039617 | 3 | 3 | 0.119868 | 0 | 3 | 0.102322 | 5 | 5 | 0.257383 | 5 | 6 | 0.235434 | 5 | 9 | 0.31414 |
| 1 | 45482071..45771881 | ZSWIM5 | 5.42176 | 5.31E-26 | 17 | 17 | 0.195829 | 11 | 11 | 0.127798 | 19 | 19 | 0.188431 | 68 | 68 | 1.017818 | 64 | 64 | 0.73021 | 80 | 80 | 0.811937 |
| 12 | 92539349..92583436 | RP11-796E2.4 | 5.416307 | 0.001042 | 0 | 0 | 0 | 4 | 5 | 0.04725 | 1 | 1 | 0.008067 | 5 | 5 | 0.060874 | 10 | 10 | 0.092805 | 9 | 9 | 0.074298 |
| 1 | 23884409..23886285 | ID3 | 5.344991 | 5.8E-134 | 133 | 133 | 5.154668 | 105 | 105 | 4.104315 | 128 | 128 | 4.270998 | 412 | 412 | 20.7481 | 561 | 561 | 21.5353 | 662 | 662 | 22.60529 |
| 7 | 43991509..44058750 | RP5-1165K10.2 | 5.33845 | 0.000274 | 3 | 12 | 0.402579 | 1 | 10 | 0.338355 | 2 | 7 | 0.20218 | 9 | 18 | 0.784647 | 13 | 23 | 0.764252 | 6 | 13 | 0.384252 |
| 3 | 52867137..52931578 | TMEM110-MUST | 5.335711 | 3.27E-05 | 2 | 13 | 0.144379 | 6 | 30 | 0.336035 | 0 | 26 | 0.248602 | 10 | 28 | 0.404064 | 8 | 23 | 0.253004 | 19 | 59 | 0.577318 |
| 11 | 66384097..66413940 | RBM14-RBM4 | 5.314785 | 0.000459 | 1 | 28 | 0.75673 | 3 | 21 | 0.572406 | 2 | 22 | 0.511889 | 6 | 68 | 2.387942 | 6 | 72 | 1.927322 | 16 | 105 | 2.500202 |
| 9 | 99918852..99983517 | ANKRD18CP | 5.297928 | 0.002605 | 1 | 1 | 0.023371 | 2 | 2 | 0.047143 | 1 | 1 | 0.020121 | 9 | 9 | 0.27331 | 3 | 3 | 0.069445 | 7 | 7 | 0.144139 |
| 2 | 172964167..172967628 | DLX2 | 5.280045 | 0.004325 | 1 | 1 | 0.02345 | 2 | 2 | 0.047301 | 1 | 1 | 0.020189 | 3 | 3 | 0.09141 | 11 | 11 | 0.255489 | 5 | 5 | 0.103303 |
| 10 | 35927177..35930362 | FZD8 | 5.274532 | 8.55E-50 | 29 | 29 | 0.633942 | 22 | 22 | 0.485039 | 38 | 38 | 0.715163 | 103 | 103 | 2.925638 | 131 | 131 | 2.836362 | 157 | 157 | 3.023807 |
| 1 | 71318036..71513491 | PTGER3 | 5.252419 | 2.17E-17 | 10 | 10 | 0.070478 | 6 | 6 | 0.042649 | 14 | 14 | 0.084948 | 35 | 35 | 0.320518 | 52 | 52 | 0.36299 | 45 | 45 | 0.279427 |
| 11 | 787104..790123 | CEND1 | 5.227607 | 1.8E-153 | 98 | 98 | 4.139068 | 95 | 95 | 4.046713 | 98 | 98 | 3.563468 | 321 | 321 | 17.61625 | 463 | 463 | 19.36852 | 485 | 485 | 18.04768 |
| 4 | 2073645..2243848 | POLN | 5.223731 | 2.11E-29 | 19 | 19 | 0.171387 | 20 | 23 | 0.209244 | 17 | 17 | 0.132021 | 58 | 60 | 0.703245 | 90 | 91 | 0.813025 | 97 | 97 | 0.770901 |
| 4 | 74606223..74609433 | IL8 | 5.22018 | 9.59E-09 | 1 | 1 | 0.030627 | 8 | 8 | 0.247115 | 5 | 5 | 0.13184 | 19 | 19 | 0.756123 | 21 | 21 | 0.637037 | 22 | 22 | 0.593653 |
| 3 | 142315229..142432506 | PLS1 | 5.21986 | 7.7E-11 | 2 | 2 | 0.026311 | 9 | 9 | 0.119415 | 8 | 8 | 0.090609 | 32 | 32 | 0.54701 | 25 | 25 | 0.325756 | 26 | 26 | 0.301363 |
| 7 | 99156291..99205433 | GS1-259H13.10 | 5.204273 | 0.001726 | 0 | 0 | 0 | 0 | 0 | 0 | 5 | 7 | 0.387201 | 6 | 9 | 0.75135 | 7 | 11 | 0.700002 | 10 | 19 | 1.075535 |
| 12 | 120427673..120532298 | CCDC64 | 5.200353 | 0.001711 | 1 | 1 | 0.014531 | 0 | 0 | 0 | 4 | 4 | 0.05004 | 5 | 5 | 0.094404 | 9 | 9 | 0.12953 | 9 | 9 | 0.115222 |
| X | 49044269..49056718 | SYP | 5.179917 | 4.58E-17 | 7 | 7 | 0.0937 | 13 | 13 | 0.175505 | 10 | 10 | 0.115243 | 42 | 44 | 0.765294 | 42 | 42 | 0.556841 | 46 | 46 | 0.542506 |
| 17 | 72838162..72857627 | GRIN2C | 5.178212 | 1.86E-07 | 5 | 5 | 0.040615 | 2 | 2 | 0.016385 | 5 | 5 | 0.034967 | 13 | 13 | 0.137211 | 20 | 20 | 0.16091 | 20 | 20 | 0.143135 |
| 8 | 23536206..23540440 | NKX3-1 | 5.173623 | 5.7E-99 | 47 | 47 | 1.000724 | 53 | 53 | 1.138138 | 55 | 55 | 1.008207 | 171 | 171 | 4.730911 | 223 | 223 | 4.702843 | 275 | 275 | 5.158844 |
| 2 | 27309615..27323640 | KHK | 5.116524 | 1.38E-12 | 15 | 17 | 0.386923 | 5 | 6 | 0.13773 | 6 | 13 | 0.254735 | 20 | 28 | 0.828068 | 46 | 52 | 1.172244 | 47 | 53 | 1.062808 |
| 5 | 150400124..150408554 | GPX3 | 5.107184 | 2.84E-44 | 891 | 891 | 23.83054 | 959 | 959 | 25.86885 | 1118 | 1118 | 25.74354 | 3268 | 3268 | 113.5717 | 4239 | 4239 | 112.2945 | 5123 | 5123 | 120.7212 |
| 2 | 10580094..10588630 | ODC1 | 5.074418 | 4.22E-38 | 530 | 530 | 12.43681 | 603 | 603 | 14.27095 | 746 | 746 | 15.07101 | 2058 | 2058 | 62.74956 | 2812 | 2812 | 65.35631 | 3035 | 3035 | 62.7473 |
| 4 | 84213614..84256306 | HPSE | 5.063878 | 0.015764 | 4 | 4 | 0.05901 | 0 | 0 | 0 | 0 | 0 | 0 | 11 | 11 | 0.210857 | 4 | 4 | 0.058447 | 3 | 3 | 0.038993 |
| 22 | 42486935..42535286 | NDUFA6-AS1 | 5.041993 | 9.23E-45 | 39 | 75 | 0.785129 | 32 | 60 | 0.63348 | 32 | 59 | 0.531743 | 134 | 264 | 3.591002 | 150 | 304 | 3.152043 | 146 | 350 | 3.228128 |
| 6 | 43474707..43478424 | LRRC73 | 5.024917 | 2.31E-09 | 7 | 16 | 0.525384 | 6 | 9 | 0.298058 | 4 | 6 | 0.16962 | 27 | 34 | 1.450666 | 20 | 37 | 1.203364 | 25 | 47 | 1.359745 |
| 9 | 139685831..139695047 | RP11-216L13.17 | 5.023627 | 0.00718 | 0 | 0 | 0 | 0 | 1 | 0.095568 | 4 | 4 | 0.326317 | 7 | 17 | 2.093104 | 3 | 7 | 0.656972 | 8 | 14 | 1.168802 |
| X | 23801290..23804343 | SAT1 | 5.003788 | 4.2E-51 | 772 | 772 | 21.52395 | 764 | 764 | 21.48327 | 929 | 929 | 22.29927 | 2750 | 2750 | 99.62526 | 3459 | 3459 | 95.51999 | 4032 | 4032 | 99.04404 |
| 6 | 26251879..26252303 | HIST1H2BH | 4.980263 | 0.002807 | 1 | 1 | 0.163873 | 0 | 0 | 0 | 4 | 4 | 0.564337 | 6 | 6 | 1.27759 | 7 | 7 | 1.136175 | 9 | 9 | 1.299433 |
| 4 | 42410390..42659122 | ATP8A1 | 4.973639 | 1.85E-31 | 22 | 22 | 0.136817 | 19 | 19 | 0.119172 | 27 | 27 | 0.144561 | 64 | 64 | 0.517166 | 104 | 104 | 0.640605 | 115 | 115 | 0.630114 |
| 10 | 135333910..135374724 | CYP2E1 | 4.967117 | 7.26E-09 | 4 | 8 | 0.057912 | 4 | 6 | 0.043806 | 7 | 9 | 0.056091 | 22 | 33 | 0.310401 | 16 | 19 | 0.136229 | 25 | 40 | 0.255117 |
| 10 | 89117425..89130452 | NUTM2D | 4.955759 | 8.08E-14 | 5 | 39 | 0.388862 | 3 | 41 | 0.412303 | 18 | 65 | 0.557975 | 29 | 123 | 1.593558 | 33 | 143 | 1.412231 | 46 | 198 | 1.739398 |
| 7 | 100805790..100808874 | VGF | 4.95504 | 9.66E-08 | 3 | 3 | 0.07727 | 5 | 5 | 0.129886 | 6 | 6 | 0.133049 | 12 | 12 | 0.401609 | 23 | 23 | 0.586756 | 24 | 24 | 0.544634 |
| 2 | 25383722..25391772 | POMC | 4.934039 | 0.000289 | 3 | 3 | 0.135851 | 4 | 4 | 0.182685 | 0 | 0 | 0 | 9 | 9 | 0.52956 | 12 | 12 | 0.538221 | 9 | 9 | 0.359076 |
| X | 154487526..154493874 | RAB39B | 4.926451 | 1.12E-05 | 0 | 0 | 0 | 2 | 2 | 0.040081 | 7 | 7 | 0.119751 | 12 | 12 | 0.309829 | 15 | 15 | 0.295216 | 11 | 11 | 0.192577 |
| 7 | 120427376..120498456 | TSPAN12 | 4.919736 | 3.16E-16 | 10 | 10 | 0.206911 | 15 | 15 | 0.313023 | 13 | 13 | 0.231578 | 28 | 28 | 0.752789 | 67 | 67 | 1.373083 | 63 | 63 | 1.148489 |
| 17 | 7517382..7536700 | SHBG | 4.917273 | 0.000511 | 3 | 3 | 0.115308 | 1 | 1 | 0.038765 | 3 | 3 | 0.099273 | 3 | 3 | 0.149828 | 14 | 14 | 0.532974 | 13 | 13 | 0.440236 |
| 4 | 142240604..142253772 | RP11-362F19.1 | 4.917066 | 8.92E-11 | 5 | 5 | 0.092862 | 7 | 7 | 0.131119 | 8 | 8 | 0.127916 | 21 | 21 | 0.506777 | 27 | 27 | 0.496671 | 35 | 36 | 0.589076 |
| 12 | 56137064..56150911 | GDF11 | 4.905815 | 1.54E-86 | 669 | 669 | 12.11474 | 611 | 611 | 11.15916 | 670 | 670 | 10.44559 | 2058 | 2058 | 48.42452 | 2725 | 2725 | 48.87574 | 3229 | 3229 | 51.518 |
| 19 | 2274631..2282181 | C19orf35 | 4.870786 | 9.26E-07 | 7 | 7 | 0.176192 | 3 | 3 | 0.076157 | 2 | 2 | 0.04334 | 9 | 9 | 0.294349 | 20 | 20 | 0.498605 | 21 | 21 | 0.465704 |
| 11 | 818902..825573 | PNPLA2 | 4.815598 | 2.96E-47 | 845 | 1432 | 25.95194 | 863 | 1361 | 24.87638 | 969 | 1562 | 24.37127 | 2809 | 4427 | 104.2481 | 3733 | 5892 | 105.7617 | 4198 | 6865 | 109.6151 |
| 18 | 77794346..77854968 | RP11-795F19.5 | 4.798133 | 1.89E-06 | 3 | 4 | 0.071395 | 3 | 4 | 0.072007 | 5 | 5 | 0.076833 | 15 | 17 | 0.394267 | 15 | 18 | 0.318216 | 15 | 21 | 0.330242 |
| 18 | 18822203..19105378 | GREB1L | 4.797784 | 1.33E-06 | 3 | 3 | 0.019763 | 1 | 1 | 0.006644 | 8 | 8 | 0.045373 | 14 | 14 | 0.11984 | 15 | 15 | 0.097875 | 20 | 20 | 0.116084 |
| 2 | 179059208..179264160 | OSBPL6 | 4.797607 | 3.1E-114 | 60 | 60 | 0.520524 | 80 | 80 | 0.699974 | 80 | 80 | 0.597517 | 238 | 238 | 2.682865 | 319 | 319 | 2.741066 | 319 | 319 | 2.43828 |

| 11 | 65222728..65234028 | AP000769.1 | 4.779452 | 3.69E-14 | 7 | 7 | 0.703496 | 13 | 13 | 1.317679 | 9 | 9 | 0.778712 | 36 | 36 | 4.701089 | 43 | 43 | 4.280272 | 37 | 37 | 3.276187 |
| --- | --- | --- | --- | --- | --- | --- | --- | --- | --- | --- | --- | --- | --- | --- | --- | --- | --- | --- | --- | --- | --- | --- |
| 10 | 75475601..75490227 | BMS1P4 | 4.77865 | 0.001253 | 2 | 4 | 0.140557 | 1 | 14 | 0.496162 | 3 | 9 | 0.272274 | 8 | 16 | 0.730543 | 13 | 18 | 0.626477 | 4 | 12 | 0.371516 |
| 1 | 6161853..6240183 | CHD5 | 4.777978 | 0.000486 | 3 | 3 | 0.021126 | 0 | 0 | 0 | 4 | 4 | 0.024251 | 10 | 10 | 0.091502 | 6 | 6 | 0.04185 | 13 | 13 | 0.080658 |
| 6 | 33130458..33160276 | COL11A2 | 4.774746 | 5.18E-34 | 27 | 27 | 0.278998 | 28 | 28 | 0.291808 | 19 | 19 | 0.169029 | 83 | 83 | 1.114416 | 94 | 94 | 0.962064 | 118 | 118 | 1.074292 |
| 1 | 32799433..32801980 | MARCKSL1 | 4.769208 | 2.54E-54 | 504 | 504 | 20.66019 | 476 | 476 | 19.67945 | 513 | 513 | 18.1047 | 1492 | 1492 | 79.47026 | 2122 | 2122 | 86.15651 | 2352 | 2352 | 84.94625 |
| 7 | 100054238..100061894 | C7orf61 | 4.767704 | 0.000191 | 4 | 6 | 0.350862 | 2 | 2 | 0.117955 | 2 | 2 | 0.10069 | 7 | 7 | 0.531882 | 10 | 11 | 0.637114 | 16 | 21 | 1.081951 |
| 20 | 58533471..58609066 | CDH26 | 4.762702 | 0.007369 | 0 | 0 | 0 | 1 | 1 | 0.012197 | 3 | 3 | 0.031235 | 9 | 9 | 0.141424 | 4 | 4 | 0.047913 | 4 | 4 | 0.04262 |
| 20 | 3143263..3154192 | LZTS3 | 4.752754 | 1.1E-133 | 129 | 129 | 1.679632 | 118 | 118 | 1.549562 | 138 | 138 | 1.546942 | 386 | 386 | 6.530462 | 524 | 524 | 6.757636 | 617 | 617 | 7.078037 |
| 14 | 38059189..38069245 | FOXA1 | 4.741638 | 0.011679 | 1 | 1 | 0.016941 | 2 | 2 | 0.034173 | 1 | 1 | 0.014585 | 5 | 5 | 0.110066 | 8 | 8 | 0.134239 | 4 | 4 | 0.059705 |
| 12 | 133694740..133707059 | ZNF891 | 4.735092 | 0.011624 | 0 | 21 | 0.355165 | 2 | 27 | 0.46055 | 2 | 35 | 0.509623 | 3 | 28 | 0.61532 | 7 | 34 | 0.569546 | 7 | 29 | 0.432127 |
| 1 | 145438469..145442635 | TXNIP | 4.734243 | 3.14E-43 | 1549 | 1549 | 29.75231 | 1720 | 1720 | 33.31962 | 2018 | 2018 | 33.37035 | 5775 | 5775 | 144.1297 | 7064 | 7064 | 134.3875 | 7833 | 7833 | 132.5564 |
| 3 | 153838792..153975616 | ARHGEF26 | 4.712577 | 2.32E-97 | 58 | 58 | 0.735922 | 52 | 52 | 0.665441 | 67 | 67 | 0.731895 | 187 | 187 | 3.083029 | 224 | 224 | 2.815081 | 283 | 283 | 3.163687 |
| 3 | 189674517..189840226 | LEPREL1 | 4.703618 | 2.32E-61 | 54 | 54 | 0.670989 | 67 | 67 | 0.839651 | 80 | 80 | 0.855819 | 196 | 196 | 3.164533 | 247 | 247 | 3.039887 | 347 | 347 | 3.798867 |
| 11 | 82895533..82904836 | RP11-727A23.5 | 4.701396 | 5.25E-07 | 5 | 5 | 0.213901 | 4 | 4 | 0.172586 | 4 | 4 | 0.147324 | 14 | 14 | 0.778221 | 17 | 17 | 0.720329 | 21 | 21 | 0.791526 |
| 10 | 75458909..75490245 | RP11-574K11.28 | 4.68978 | 2.47E-06 | 5 | 21 | 0.764542 | 3 | 13 | 0.47734 | 4 | 9 | 0.282095 | 10 | 28 | 1.324562 | 23 | 50 | 1.802981 | 15 | 36 | 1.154749 |
| 6 | 24544332..24646383 | KIAA0319 | 4.686487 | 2.21E-06 | 2 | 2 | 0.019885 | 4 | 4 | 0.04011 | 6 | 6 | 0.051358 | 10 | 10 | 0.129188 | 15 | 15 | 0.147713 | 23 | 23 | 0.201474 |
| 3 | 186256230..186264491 | CRYGS | 4.678077 | 1.29E-05 | 4 | 4 | 0.129514 | 5 | 5 | 0.163279 | 2 | 2 | 0.055752 | 11 | 11 | 0.462787 | 16 | 16 | 0.513116 | 17 | 17 | 0.484963 |
| 7 | 106685094..106802256 | PRKAR2B | 4.621866 | 8.4E-138 | 133 | 133 | 2.145192 | 132 | 132 | 2.14729 | 142 | 142 | 1.971847 | 459 | 459 | 9.619649 | 550 | 550 | 8.786505 | 544 | 545 | 7.74487 |
| 12 | 6643093..6647537 | GAPDH | 4.621793 | 3.1E-50 | 22527 | 29372 | 687.6124 | 23009 | 30122 | 711.2074 | 28611 | 36752 | 740.7326 | 73630 | 93685 | 2849.786 | 96626 | 124518 | 2887.229 | 114847 | 147306 | 3038.321 |
| 1 | 162336698..162356600 | C1orf226 | 4.603895 | 6.89E-23 | 15 | 18 | 0.279392 | 16 | 17 | 0.266129 | 20 | 25 | 0.334081 | 52 | 61 | 1.230277 | 71 | 82 | 1.260648 | 73 | 84 | 1.148745 |
| 9 | 114287439..114340124 | ZNF483 | 4.603672 | 1.29E-08 | 2 | 2 | 0.024275 | 8 | 9 | 0.110175 | 7 | 8 | 0.083598 | 22 | 27 | 0.425826 | 21 | 23 | 0.276505 | 23 | 24 | 0.256656 |
| 3 | 160473390..160796695 | PPM1L | 4.585856 | 1.6E-96 | 74 | 74 | 0.414061 | 102 | 102 | 0.575619 | 99 | 99 | 0.476912 | 298 | 299 | 2.173881 | 367 | 367 | 2.033937 | 379 | 379 | 1.868421 |
| 3 | 138663066..138665982 | FOXL2 | 4.577132 | 0.001881 | 0 | 0 | 0 | 4 | 4 | 0.096321 | 2 | 2 | 0.041111 | 6 | 6 | 0.186142 | 11 | 11 | 0.260131 | 7 | 7 | 0.147252 |
| 9 | 130683158..130693076 | PIP5KL1 | 4.574358 | 1.23E-29 | 26 | 26 | 0.541993 | 21 | 21 | 0.441512 | 24 | 24 | 0.430727 | 72 | 72 | 1.950227 | 92 | 92 | 1.899536 | 107 | 107 | 1.965204 |
| 16 | 2325882..2390747 | ABCA3 | 4.53388 | 5.4E-147 | 231 | 232 | 2.070465 | 210 | 211 | 1.899174 | 208 | 210 | 1.613502 | 667 | 673 | 7.804175 | 792 | 793 | 7.009581 | 1001 | 1005 | 7.902219 |
| 11 | 61727190..61735132 | FTH1 | 4.527132 | 7.94E-75 | 52139 | 80211 | 2751.915 | 47887 | 77791 | 2691.738 | 53833 | 90651 | 2677.59 | 143096 | 240510 | 10721.77 | 201671 | 327685 | 11135.16 | 241629 | 387227 | 11704.96 |
| 8 | 75146935..75233563 | JPH1 | 4.517712 | 0.013862 | 0 | 0 | 0 | 2 | 2 | 0.032089 | 2 | 2 | 0.027392 | 10 | 10 | 0.206706 | 5 | 5 | 0.078783 | 1 | 1 | 0.014016 |
| 12 | 92536286..92539673 | BTG1 | 4.505959 | 2.55E-37 | 529 | 555 | 14.74203 | 539 | 587 | 15.72551 | 694 | 781 | 17.86018 | 1725 | 1891 | 65.26616 | 2324 | 2530 | 66.56163 | 2536 | 2835 | 66.3469 |
| 21 | 45225639..45232448 | AP001053.11 | 4.504039 | 9.11E-08 | 6 | 6 | 0.085736 | 7 | 7 | 0.100882 | 4 | 4 | 0.049209 | 13 | 13 | 0.241372 | 21 | 21 | 0.297214 | 31 | 31 | 0.39028 |
| 5 | 115140430..115152651 | CDO1 | 4.481325 | 2.03E-21 | 14 | 14 | 0.44543 | 14 | 14 | 0.449243 | 27 | 27 | 0.739581 | 51 | 51 | 2.108403 | 62 | 62 | 1.953809 | 93 | 93 | 2.606978 |
| 2 | 140988992..142889270 | LRP1B | 4.469952 | 0.019069 | 0 | 0 | 0 | 1 | 1 | 0.004122 | 3 | 3 | 0.010556 | 5 | 5 | 0.026554 | 5 | 5 | 0.020241 | 6 | 6 | 0.021606 |
| 8 | 25699246..25902913 | EBF2 | 4.45986 | 0.019528 | 0 | 0 | 0 | 1 | 1 | 0.009925 | 3 | 3 | 0.025418 | 3 | 3 | 0.038362 | 3 | 3 | 0.029242 | 10 | 10 | 0.086706 |
| 6 | 36683256..36699870 | RAB44 | 4.439844 | 0.001258 | 3 | 3 | 0.076061 | 3 | 3 | 0.076712 | 1 | 1 | 0.021828 | 5 | 5 | 0.164718 | 14 | 14 | 0.351565 | 8 | 8 | 0.178703 |
| 5 | 78668459..78810040 | HOMER1 | 4.43793 | 1.25E-68 | 60 | 60 | 0.679033 | 82 | 82 | 0.935957 | 105 | 106 | 1.032799 | 219 | 224 | 3.293971 | 330 | 331 | 3.710279 | 364 | 373 | 3.719218 |
| 7 | 131185021..131242976 | PODXL | 4.437488 | 6.73E-18 | 16 | 16 | 0.16178 | 13 | 13 | 0.132571 | 22 | 22 | 0.191512 | 43 | 43 | 0.564943 | 84 | 84 | 0.841245 | 62 | 62 | 0.55233 |
| 16 | 2787077..2802601 | SRRM2-AS1 | 4.4354 | 0.001952 | 2 | 2 | 0.023778 | 2 | 2 | 0.023982 | 3 | 3 | 0.030707 | 4 | 4 | 0.061793 | 9 | 9 | 0.105981 | 14 | 14 | 0.146649 |
| 13 | 27844464..27847827 | RASL11A | 4.431933 | 3.1E-142 | 157 | 157 | 6.733033 | 177 | 177 | 7.655731 | 203 | 203 | 7.495101 | 462 | 462 | 25.74454 | 713 | 713 | 30.28584 | 820 | 820 | 30.98333 |
| 19 | 36358801..36370693 | APLP1 | 4.427808 | 5.09E-84 | 74 | 83 | 1.581135 | 78 | 87 | 1.671524 | 81 | 83 | 1.361255 | 205 | 214 | 5.297083 | 299 | 311 | 5.868003 | 360 | 367 | 6.159708 |
| 5 | 139226364..139422884 | NRG2 | 4.414622 | 6.69E-07 | 3 | 3 | 0.045981 | 7 | 7 | 0.108208 | 5 | 5 | 0.065978 | 19 | 19 | 0.378394 | 18 | 19 | 0.288437 | 19 | 23 | 0.310592 |
| 3 | 142838173..142841800 | CHST2 | 4.413687 | 1.1E-174 | 175 | 175 | 3.45663 | 189 | 189 | 3.765121 | 220 | 220 | 3.741173 | 604 | 604 | 15.50186 | 770 | 770 | 15.06415 | 754 | 754 | 13.12168 |
| 1 | 65713902..65881552 | DNAJC6 | 4.410602 | 8.3E-06 | 2 | 2 | 0.020167 | 4 | 4 | 0.040679 | 6 | 6 | 0.052087 | 14 | 14 | 0.183429 | 16 | 16 | 0.159796 | 15 | 15 | 0.133261 |
| 5 | 179233388..179265078 | SQSTM1 | 4.402833 | 2.53E-36 | 14929 | 19230 | 174.7515 | 13883 | 18445 | 169.0529 | 15913 | 21331 | 166.8873 | 43405 | 58248 | 687.7882 | 58514 | 77938 | 701.5036 | 62171 | 82833 | 663.2055 |
| 19 | 50360227..50362546 | AC018766.5 | 4.400747 | 0.003223 | 3 | 13 | 0.885044 | 2 | 13 | 0.892621 | 1 | 15 | 0.879191 | 11 | 21 | 1.857688 | 4 | 34 | 2.292659 | 8 | 34 | 2.039405 |
| 4 | 57396775..57469673 | THEGL | 4.394341 | 0.000321 | 2 | 2 | 0.077687 | 5 | 5 | 0.19588 | 2 | 2 | 0.066883 | 10 | 10 | 0.504718 | 8 | 8 | 0.307784 | 16 | 16 | 0.54757 |
| 8 | 89044237..89340254 | MMP16 | 4.384377 | 2.25E-30 | 27 | 28 | 0.160965 | 28 | 29 | 0.168141 | 31 | 34 | 0.168276 | 97 | 102 | 0.761914 | 95 | 98 | 0.558006 | 121 | 125 | 0.633121 |
| 4 | 22346694..22517677 | GPR125 | 4.382055 | 1E-155 | 257 | 276 | 2.080114 | 360 | 374 | 2.842838 | 359 | 377 | 2.446188 | 932 | 962 | 9.420746 | 1288 | 1346 | 10.0476 | 1334 | 1401 | 9.302923 |
| 14 | 68000018..68056329 | PLEKHH1 | 4.379942 | 0.000334 | 4 | 5 | 0.032193 | 4 | 6 | 0.038962 | 1 | 4 | 0.022173 | 6 | 6 | 0.050197 | 10 | 12 | 0.076526 | 18 | 19 | 0.107782 |
| 19 | 9435021..9493293 | ZNF177 | 4.365604 | 0.04969 | 0 | 12 | 0.245233 | 0 | 15 | 0.309166 | 3 | 13 | 0.228724 | 4 | 23 | 0.610742 | 2 | 14 | 0.283377 | 6 | 24 | 0.432127 |
| X | 128779240..128788933 | APLN | 4.357791 | 9.19E-11 | 9 | 9 | 0.194663 | 3 | 3 | 0.065443 | 13 | 13 | 0.242078 | 30 | 30 | 0.84313 | 34 | 34 | 0.728382 | 27 | 27 | 0.514527 |

| 1 | 169455380..169456846 | AL021068.1 | 4.356628 | 0.049617 | 1 | 1 | 0.047605 | 0 | 0 | 0 | 2 | 2 | 0.08197 | 2 | 2 | 0.123713 | 3 | 3 | 0.141453 | 7 | 7 | 0.293599 |
| --- | --- | --- | --- | --- | --- | --- | --- | --- | --- | --- | --- | --- | --- | --- | --- | --- | --- | --- | --- | --- | --- | --- |
| 12 | 89741009..89747048 | DUSP6 | 4.356556 | 5.08E-91 | 147 | 147 | 2.210273 | 135 | 135 | 2.047221 | 185 | 185 | 2.394808 | 454 | 454 | 8.869854 | 599 | 599 | 8.920607 | 633 | 633 | 8.385624 |
| 22 | 39214457..39239987 | NPTXR | 4.353455 | 7.03E-98 | 63 | 63 | 0.758594 | 60 | 60 | 0.728656 | 79 | 79 | 0.818967 | 182 | 182 | 2.847556 | 252 | 252 | 3.005442 | 299 | 299 | 3.172073 |
| 6 | 32936437..32949282 | BRD2 | 4.324361 | 2E-42 | 2246 | 2617 | 24.84176 | 2202 | 2576 | 24.66191 | 2623 | 2996 | 24.48447 | 6573 | 7585 | 93.55484 | 8706 | 10117 | 95.11945 | 10224 | 11933 | 99.80019 |
| 17 | 43224684..43229468 | HEXIM1 | 4.321138 | 8E-208 | 1101 | 1233 | 17.94644 | 939 | 1064 | 15.61921 | 1041 | 1177 | 14.74898 | 2873 | 3293 | 62.27862 | 3995 | 4571 | 65.89696 | 4281 | 4889 | 62.69578 |
| 2 | 101624079..101869328 | TBC1D8 | 4.318983 | 1.72E-47 | 80 | 105 | 1.212744 | 49 | 65 | 0.757174 | 68 | 89 | 0.884994 | 215 | 236 | 3.541799 | 234 | 277 | 3.168827 | 254 | 313 | 3.185131 |
| 9 | 139256355..139268133 | CARD9 | 4.317577 | 2.03E-35 | 46 | 75 | 0.779737 | 32 | 47 | 0.492819 | 43 | 62 | 0.554944 | 102 | 119 | 1.607556 | 145 | 184 | 1.894715 | 191 | 230 | 2.106775 |
| 11 | 105480721..105852819 | GRIA4 | 4.314184 | 0.007595 | 0 | 0 | 0 | 2 | 2 | 0.013933 | 3 | 3 | 0.01784 | 7 | 7 | 0.062826 | 4 | 4 | 0.027366 | 8 | 8 | 0.048686 |
| 15 | 83141718..83182928 | RP13-996F3.3 | 4.312042 | 6.31E-06 | 4 | 38 | 1.491857 | 3 | 18 | 0.712719 | 7 | 22 | 0.743595 | 13 | 77 | 3.927953 | 27 | 94 | 3.655193 | 11 | 61 | 2.109971 |
| 11 | 62104920..62160882 | ASRGL1 | 4.312016 | 0.007565 | 1 | 1 | 0.015193 | 2 | 2 | 0.030647 | 2 | 2 | 0.026161 | 7 | 12 | 0.2369 | 4 | 8 | 0.120388 | 8 | 12 | 0.160634 |
| 12 | 6881678..6887621 | LAG3 | 4.311458 | 2.63E-07 | 5 | 5 | 0.11395 | 7 | 7 | 0.160896 | 5 | 5 | 0.098103 | 16 | 16 | 0.473801 | 21 | 21 | 0.474026 | 25 | 25 | 0.501981 |
| 12 | 14920933..14924065 | HIST4H4 | 4.280823 | 5.21E-11 | 8 | 8 | 0.216125 | 7 | 7 | 0.190728 | 12 | 12 | 0.279104 | 28 | 28 | 0.982889 | 25 | 25 | 0.668949 | 44 | 44 | 1.047297 |
| 1 | 3816936..3833789 | LINC01134 | 4.278886 | 0.003037 | 4 | 4 | 0.068549 | 0 | 0 | 0 | 3 | 3 | 0.044262 | 5 | 5 | 0.111339 | 10 | 10 | 0.169739 | 11 | 11 | 0.166088 |
| 19 | 7587512..7598895 | MCOLN1 | 4.276564 | 2.25E-57 | 405 | 412 | 7.25334 | 418 | 427 | 7.581778 | 480 | 488 | 7.396581 | 1166 | 1186 | 27.13049 | 1623 | 1653 | 28.8239 | 1864 | 1897 | 29.42465 |
| 1 | 40420802..40435638 | MFSD2A | 4.271223 | 3.32E-07 | 5 | 5 | 0.087342 | 11 | 11 | 0.193796 | 4 | 4 | 0.060156 | 10 | 10 | 0.226978 | 28 | 28 | 0.484449 | 35 | 35 | 0.538669 |
| 4 | 121956768..121994176 | NDNF | 4.26382 | 1.13E-42 | 48 | 54 | 1.057619 | 38 | 50 | 0.987661 | 50 | 62 | 1.045436 | 128 | 159 | 4.04636 | 182 | 216 | 4.190136 | 172 | 217 | 3.744538 |
| 9 | 140135665..140138159 | TUBB4B | 4.262191 | 1.39E-35 | 3613 | 3675 | 121.2457 | 3350 | 3415 | 113.6323 | 3869 | 3912 | 111.1164 | 10279 | 10394 | 445.5779 | 13237 | 13402 | 437.9429 | 14943 | 15136 | 439.9701 |
| 21 | 47063608..47362368 | PCBP3 | 4.25677 | 1.69E-75 | 72 | 72 | 0.737864 | 49 | 49 | 0.506457 | 78 | 78 | 0.688191 | 194 | 194 | 2.583316 | 238 | 238 | 2.415793 | 271 | 271 | 2.4469 |
| 11 | 94822974..94865809 | ENDOD1 | 4.230491 | 1.4E-100 | 440 | 440 | 6.53815 | 558 | 558 | 8.362549 | 587 | 587 | 7.509493 | 1462 | 1463 | 28.24741 | 1988 | 1991 | 29.30302 | 2123 | 2123 | 27.79427 |
| 1 | 94350761..94374966 | GCLM | 4.229867 | 1.76E-82 | 276 | 279 | 3.615794 | 306 | 307 | 4.012732 | 393 | 394 | 4.396084 | 896 | 898 | 15.12195 | 1230 | 1235 | 15.85278 | 1290 | 1294 | 14.77532 |
| 3 | 156391024..156424559 | TIPARP | 4.224681 | 9.7E-165 | 136 | 136 | 1.876362 | 178 | 178 | 2.476852 | 196 | 196 | 2.328114 | 465 | 465 | 8.336098 | 625 | 625 | 8.540765 | 701 | 701 | 8.521164 |
| 1 | 12627939..12677737 | DHRS3 | 4.221559 | 1.36E-28 | 447 | 447 | 10.25085 | 448 | 448 | 10.36174 | 489 | 489 | 9.654539 | 1288 | 1288 | 38.37958 | 1730 | 1730 | 39.29501 | 1844 | 1844 | 37.25773 |
| 15 | 82765134..82798350 | RP11-152F13.3 | 4.217997 | 3.88E-06 | 6 | 33 | 1.307351 | 4 | 26 | 1.038853 | 4 | 26 | 0.886792 | 17 | 72 | 3.706319 | 18 | 75 | 2.94292 | 15 | 64 | 2.233888 |
| 12 | 56075330..56078395 | METTL7B | 4.215986 | 4.95E-24 | 19 | 19 | 0.87867 | 20 | 20 | 0.932834 | 28 | 28 | 1.114809 | 56 | 56 | 3.365056 | 81 | 81 | 3.71019 | 99 | 99 | 4.033764 |
| 9 | 140194083..140196703 | NRARP | 4.210474 | 0.004884 | 0 | 0 | 0 | 3 | 3 | 0.0804 | 3 | 3 | 0.068631 | 9 | 9 | 0.310745 | 6 | 6 | 0.157914 | 7 | 7 | 0.163882 |
| 2 | 71163012..71192536 | ATP6V1B1 | 4.210134 | 2.05E-05 | 4 | 10 | 0.262518 | 5 | 6 | 0.15886 | 3 | 7 | 0.158208 | 13 | 18 | 0.613994 | 15 | 19 | 0.494029 | 15 | 26 | 0.601363 |
| 5 | 148206156..148208196 | ADRB2 | 4.205261 | 2.11E-15 | 6 | 6 | 0.204741 | 19 | 19 | 0.653898 | 17 | 17 | 0.499429 | 34 | 34 | 1.507527 | 52 | 52 | 1.757505 | 62 | 62 | 1.864013 |
| 1 | 186798085..186958113 | PLA2G4A | 4.204202 | 1.23E-30 | 27 | 27 | 0.654068 | 29 | 29 | 0.708532 | 44 | 44 | 0.917661 | 108 | 108 | 3.3995 | 122 | 122 | 2.927238 | 117 | 117 | 2.497171 |
| 16 | 86609974..86615303 | FOXL1 | 4.202852 | 1.89E-93 | 672 | 672 | 14.28639 | 573 | 573 | 12.28599 | 666 | 666 | 12.18983 | 1796 | 1796 | 49.61256 | 2425 | 2425 | 51.06272 | 2461 | 2461 | 46.0965 |
| 2 | 74443369..74570541 | SLC4A5 | 4.201096 | 0.004814 | 4 | 11 | 0.095656 | 0 | 0 | 0 | 2 | 3 | 0.02246 | 7 | 14 | 0.15819 | 6 | 17 | 0.146422 | 9 | 25 | 0.191541 |
| X | 1455509..1501578 | IL3RA | 4.200256 | 0.004912 | 0 | 0 | 0 | 4 | 4 | 0.164695 | 2 | 2 | 0.070294 | 5 | 5 | 0.265228 | 11 | 11 | 0.444785 | 6 | 6 | 0.21581 |
| 2 | 70351168..70352449 | AC016700.5 | 4.198662 | 0.007613 | 3 | 3 | 0.315617 | 0 | 0 | 0 | 3 | 3 | 0.271726 | 5 | 5 | 0.683504 | 8 | 8 | 0.83362 | 9 | 9 | 0.834228 |
| 11 | 118964564..118966177 | H2AFX | 4.189708 | 1.7E-158 | 526 | 526 | 22.69757 | 499 | 499 | 21.71683 | 543 | 543 | 20.17269 | 1294 | 1294 | 72.55376 | 1905 | 1905 | 81.41934 | 2346 | 2346 | 89.19176 |
| 12 | 25261354..25348096 | CASC1 | 4.187833 | 0.031358 | 2 | 2 | 0.047186 | 0 | 0 | 0 | 2 | 2 | 0.040624 | 3 | 3 | 0.091967 | 4 | 4 | 0.093472 | 8 | 8 | 0.166293 |
| 7 | 82383329..82792246 | PCLO | 4.179926 | 2.79E-07 | 6 | 6 | 0.018272 | 2 | 2 | 0.006143 | 9 | 9 | 0.023596 | 15 | 15 | 0.059355 | 24 | 24 | 0.07239 | 21 | 21 | 0.056345 |
| 7 | 8008425..8133902 | GLCCI1 | 4.166849 | 1.5E-51 | 48 | 97 | 0.981217 | 73 | 108 | 1.101842 | 97 | 113 | 0.984106 | 220 | 276 | 3.627725 | 241 | 328 | 3.286291 | 287 | 378 | 3.3689 |
| 12 | 70132461..70216984 | RAB3IP | 4.153025 | 4.5E-15 | 8 | 24 | 0.132533 | 16 | 37 | 0.206071 | 16 | 32 | 0.152137 | 35 | 62 | 0.444874 | 49 | 78 | 0.426625 | 55 | 86 | 0.418422 |
| 7 | 72848109..72850450 | FZD9 | 4.151558 | 1.17E-08 | 6 | 6 | 0.178427 | 11 | 11 | 0.329917 | 5 | 5 | 0.128012 | 21 | 21 | 0.81145 | 22 | 22 | 0.647995 | 34 | 34 | 0.890825 |
| 1 | 202848085..202858263 | RABIF | 4.137763 | 3.1E-134 | 99 | 99 | 2.837436 | 103 | 103 | 2.977354 | 114 | 114 | 2.812976 | 293 | 293 | 10.91165 | 384 | 384 | 10.90087 | 409 | 409 | 10.32803 |
| 2 | 20646835..20649200 | RHOB | 4.123677 | 5.65E-84 | 1266 | 1266 | 37.26628 | 1162 | 1162 | 34.49776 | 1241 | 1241 | 31.45028 | 3114 | 3114 | 119.1058 | 4535 | 4535 | 132.2205 | 5084 | 5084 | 131.8533 |
| 1 | 1177826..1182102 | FAM132A | 4.109385 | 1.99E-13 | 15 | 15 | 0.582326 | 11 | 11 | 0.430695 | 10 | 10 | 0.33423 | 34 | 34 | 1.715085 | 38 | 38 | 1.461158 | 52 | 52 | 1.778612 |
| 6 | 53362139..53481768 | GCLC | 4.096602 | 2E-53 | 336 | 336 | 2.765108 | 309 | 309 | 2.564682 | 371 | 371 | 2.628555 | 894 | 894 | 9.559658 | 1223 | 1223 | 9.968693 | 1350 | 1351 | 9.795605 |
| 4 | 2229191..2243891 | HAUS3 | 4.095168 | 1.72E-14 | 14 | 77 | 0.758844 | 15 | 69 | 0.685825 | 11 | 83 | 0.704223 | 40 | 155 | 1.984841 | 44 | 186 | 1.815574 | 53 | 216 | 1.875508 |
| 11 | 65265233..65273940 | MALAT1 | 4.091946 | 1.9E-180 | 928 | 928 | 62.68829 | 1195 | 1195 | 81.4158 | 1193 | 1193 | 69.38239 | 3235 | 3235 | 283.9519 | 3882 | 3882 | 259.7365 | 4082 | 4082 | 242.9487 |
| 19 | 40353963..40440533 | FCGBP | 4.091606 | 1.51E-08 | 13 | 13 | 0.054661 | 12 | 12 | 0.050888 | 4 | 4 | 0.01448 | 18 | 18 | 0.098341 | 48 | 48 | 0.1999 | 35 | 35 | 0.129659 |
| 6 | 30710706..30711369 | XXbac-BPG252P9 | 4.078532 | 0.019655 | 0 | 0 | 0 | 4 | 5 | 0.666437 | 1 | 1 | 0.113778 | 3 | 3 | 0.515157 | 7 | 7 | 0.91627 | 8 | 9 | 1.04793 |
| 6 | 24495080..24537435 | ALDH5A1 | 4.058728 | 0.001894 | 2 | 2 | 0.025211 | 3 | 3 | 0.038141 | 3 | 4 | 0.043411 | 6 | 6 | 0.098276 | 12 | 12 | 0.149825 | 10 | 10 | 0.111063 |
| 16 | 54964774..54968397 | IRX5 | 4.054295 | 0.003096 | 3 | 3 | 0.073441 | 0 | 0 | 0 | 5 | 5 | 0.105379 | 5 | 5 | 0.159044 | 8 | 8 | 0.193974 | 15 | 15 | 0.323526 |
| 11 | 73087309..73108519 | RELT | 4.035227 | 1.3E-17 | 22 | 25 | 0.275412 | 14 | 16 | 0.177773 | 16 | 22 | 0.208658 | 53 | 70 | 1.002012 | 55 | 74 | 0.807446 | 67 | 80 | 0.77649 |

| 5 | 60628100..60841997 | ZSWIM6 | 4.018677 | 8.19E-28 | 375 | 375 | 4.747738 | 398 | 398 | 5.082073 | 481 | 481 | 5.242892 | 1118 | 1118 | 18.39202 | 1437 | 1437 | 18.01985 | 1626 | 1626 | 18.13757 |
| --- | --- | --- | --- | --- | --- | --- | --- | --- | --- | --- | --- | --- | --- | --- | --- | --- | --- | --- | --- | --- | --- | --- |
| 12 | 122064455..122080583 | ORAI1 | 4.014881 | 2.32E-82 | 243 | 243 | 7.478575 | 247 | 248 | 7.697799 | 253 | 254 | 6.730024 | 624 | 626 | 25.03335 | 862 | 863 | 26.30646 | 1012 | 1013 | 27.46788 |
| 3 | 196433148..196439164 | CEP19 | 4.012661 | 8.62E-05 | 0 | 30 | 0.949289 | 5 | 40 | 1.276555 | 7 | 47 | 1.280399 | 8 | 50 | 2.055792 | 17 | 84 | 2.632664 | 16 | 73 | 2.035181 |
| 8 | 134249414..134314265 | NDRG1 | 3.997172 | 1.11E-66 | 972 | 972 | 6.891587 | 944 | 944 | 6.750366 | 1156 | 1156 | 7.056367 | 2587 | 2587 | 23.83315 | 3559 | 3559 | 24.99309 | 4098 | 4098 | 25.5993 |
| 15 | 85747141..85778026 | RP11-561C5.4 | 3.978053 | 3.35E-05 | 3 | 16 | 0.348994 | 6 | 26 | 0.571971 | 4 | 29 | 0.544586 | 10 | 66 | 1.870571 | 14 | 82 | 1.77154 | 20 | 125 | 2.402212 |
| 11 | 112046190..112095422 | BCO2 | 3.970546 | 0.000771 | 3 | 4 | 0.041035 | 6 | 6 | 0.062079 | 1 | 3 | 0.026496 | 8 | 9 | 0.119968 | 15 | 18 | 0.182895 | 11 | 17 | 0.153654 |
| 14 | 68048672..68067004 | PIGH | 3.961476 | 7.2E-36 | 45 | 48 | 1.146832 | 49 | 60 | 1.445813 | 64 | 69 | 1.419312 | 121 | 138 | 4.2842 | 170 | 189 | 4.472593 | 233 | 246 | 5.178414 |
| 1 | 113252616..113258099 | PPM1J | 3.953291 | 8.7E-12 | 13 | 15 | 0.363498 | 9 | 16 | 0.39105 | 11 | 17 | 0.354674 | 34 | 35 | 1.102073 | 40 | 42 | 1.008088 | 35 | 43 | 0.918083 |
| 4 | 186317175..186321782 | ANKRD37 | 3.951163 | 1.05E-16 | 21 | 23 | 0.620877 | 12 | 12 | 0.326709 | 17 | 19 | 0.441572 | 46 | 49 | 1.718722 | 53 | 59 | 1.577497 | 66 | 69 | 1.64108 |
| 19 | 40927499..40931932 | SERTAD1 | 3.94795 | 4.8E-143 | 209 | 209 | 6.885547 | 172 | 172 | 5.715088 | 221 | 221 | 6.268372 | 565 | 565 | 24.18648 | 695 | 695 | 22.67858 | 703 | 703 | 20.40566 |
| 1 | 111956936..111970399 | OVGP1 | 3.93826 | 2.71E-08 | 6 | 6 | 0.139852 | 11 | 11 | 0.25859 | 7 | 7 | 0.14047 | 28 | 28 | 0.848021 | 30 | 30 | 0.692591 | 21 | 21 | 0.43126 |
| 16 | 30064411..30081778 | ALDOA | 3.931145 | 6.52E-34 | 12942 | 12942 | 146.4912 | 12051 | 12051 | 137.5738 | 14184 | 14186 | 138.2422 | 33525 | 33525 | 493.0728 | 44957 | 44957 | 504.0186 | 49956 | 49957 | 498.2068 |
| 16 | 22357257..22448486 | CDR2 | 3.927366 | 1.95E-26 | 617 | 617 | 10.88442 | 596 | 600 | 10.67514 | 661 | 661 | 10.03903 | 1646 | 1648 | 37.77542 | 2145 | 2146 | 37.49632 | 2331 | 2332 | 36.2453 |
| 6 | 27805658..27806117 | HIST1H2AK | 3.90226 | 0.005085 | 5 | 5 | 0.757023 | 2 | 2 | 0.305402 | 1 | 1 | 0.13035 | 6 | 6 | 1.180382 | 5 | 5 | 0.749805 | 16 | 16 | 2.134334 |
| 15 | 31775329..32162992 | OTUD7A | 3.89955 | 3.61E-08 | 5 | 5 | 0.052571 | 14 | 14 | 0.148459 | 5 | 5 | 0.04526 | 17 | 18 | 0.245913 | 27 | 27 | 0.281177 | 35 | 36 | 0.33349 |
| 12 | 49458468..49463808 | RHEBL1 | 3.881386 | 3.43E-05 | 3 | 3 | 0.161968 | 4 | 4 | 0.217806 | 7 | 7 | 0.325369 | 15 | 15 | 1.052279 | 12 | 12 | 0.641694 | 19 | 19 | 0.903783 |
| 6 | 2887500..2903514 | SERPINB9 | 3.878078 | 8.75E-68 | 84 | 84 | 1.42066 | 97 | 97 | 1.654569 | 128 | 129 | 1.878325 | 237 | 238 | 5.230218 | 359 | 360 | 6.030486 | 403 | 404 | 6.019983 |
| 11 | 62457747..62477317 | BSCL2 | 3.868448 | 1.76E-50 | 83 | 109 | 1.895962 | 64 | 99 | 1.736763 | 68 | 109 | 1.6323 | 178 | 268 | 6.057172 | 227 | 341 | 5.874845 | 291 | 446 | 6.83504 |
| 22 | 19023795..19109967 | DGCR2 | 3.862326 | 1.26E-31 | 1339 | 1422 | 17.69779 | 1273 | 1347 | 16.90789 | 1493 | 1564 | 16.75817 | 3456 | 3631 | 58.71888 | 4695 | 4940 | 60.89552 | 5049 | 5372 | 58.90587 |
| 17 | 4835592..4838325 | GP1BA | 3.851948 | 1.58E-13 | 11 | 11 | 0.306321 | 15 | 15 | 0.421286 | 15 | 15 | 0.359621 | 35 | 35 | 1.266437 | 49 | 49 | 1.351508 | 48 | 48 | 1.177681 |
| X | 152953554..152962048 | SLC6A8 | 3.848987 | 2.62E-60 | 502 | 642 | 8.132563 | 536 | 667 | 8.521588 | 643 | 759 | 8.277601 | 1382 | 1661 | 27.33972 | 1892 | 2285 | 28.66933 | 2108 | 2626 | 29.30827 |
| 17 | 30813637..30818274 | CDK5R1 | 3.84628 | 1.01E-22 | 18 | 18 | 0.289857 | 23 | 23 | 0.373543 | 33 | 33 | 0.457504 | 62 | 62 | 1.297283 | 82 | 82 | 1.307868 | 93 | 93 | 1.319463 |
| 1 | 119683019..119818596 | RP11-418J17.1 | 3.843329 | 4.82E-47 | 38 | 61 | 0.777813 | 56 | 69 | 0.887354 | 73 | 88 | 0.966047 | 139 | 161 | 2.667494 | 183 | 212 | 2.677443 | 211 | 252 | 2.83106 |
| 3 | 97483365..97519953 | ARL6 | 3.834259 | 9.67E-20 | 20 | 20 | 0.616065 | 21 | 21 | 0.652406 | 25 | 25 | 0.66299 | 59 | 59 | 2.36146 | 63 | 63 | 1.922101 | 89 | 89 | 2.415404 |
| 2 | 97426639..97477628 | CNNM4 | 3.833964 | 3.8E-129 | 104 | 104 | 1.393459 | 139 | 139 | 1.878356 | 157 | 157 | 1.811052 | 338 | 338 | 5.884501 | 436 | 436 | 5.786105 | 499 | 499 | 5.890668 |
| 5 | 137801179..137805004 | EGR1 | 3.829497 | 4.65E-60 | 751 | 751 | 16.66802 | 688 | 688 | 15.4005 | 781 | 781 | 14.92332 | 1749 | 1749 | 50.43895 | 2436 | 2436 | 53.55012 | 2958 | 2958 | 57.84229 |
| 7 | 104590762..104653491 | LINC01004 | 3.828377 | 0.012192 | 0 | 2 | 0.123159 | 3 | 3 | 0.186319 | 3 | 3 | 0.159047 | 7 | 7 | 0.560099 | 5 | 5 | 0.30496 | 8 | 8 | 0.434038 |
| 15 | 99638420..99675798 | SYNM | 3.826741 | 3.41E-76 | 76 | 163 | 1.452075 | 71 | 160 | 1.437553 | 91 | 177 | 1.357516 | 185 | 404 | 4.676435 | 278 | 589 | 5.197036 | 296 | 603 | 4.732841 |
| 8 | 117950438..117956726 | AARD | 3.824336 | 0.018996 | 2 | 2 | 0.05775 | 2 | 2 | 0.058244 | 2 | 2 | 0.049719 | 5 | 5 | 0.187595 | 9 | 9 | 0.257396 | 6 | 7 | 0.178082 |
| 16 | 8768422..8878432 | ABAT | 3.817284 | 1.57E-10 | 8 | 23 | 0.164395 | 8 | 25 | 0.18022 | 15 | 37 | 0.227684 | 27 | 64 | 0.594391 | 37 | 78 | 0.552196 | 35 | 87 | 0.547876 |
| 3 | 97595819..97663810 | CRYBG3_2 | 3.805716 | 8.88E-67 | 110 | 170 | 2.366549 | 127 | 186 | 2.611451 | 167 | 266 | 3.188002 | 349 | 529 | 9.568731 | 483 | 693 | 9.55518 | 435 | 688 | 8.438363 |
| 4 | 20254883..20622184 | SLIT2 | 3.795606 | 6.3E-80 | 378 | 378 | 2.714046 | 449 | 449 | 3.251427 | 519 | 519 | 3.208212 | 1114 | 1114 | 10.39304 | 1468 | 1468 | 10.43976 | 1660 | 1660 | 10.50114 |
| 7 | 105080108..105162714 | PUS7 | 3.782583 | 5.7E-112 | 88 | 88 | 1.386307 | 96 | 96 | 1.525282 | 119 | 119 | 1.613964 | 241 | 241 | 4.933166 | 347 | 347 | 5.414334 | 365 | 365 | 5.066086 |
| 12 | 125671382..126146917 | TMEM132B | 3.777161 | 3.15E-12 | 9 | 9 | 0.040037 | 10 | 10 | 0.044866 | 19 | 19 | 0.072768 | 31 | 31 | 0.179188 | 39 | 39 | 0.171838 | 50 | 50 | 0.19597 |
| 13 | 114076260..114107839 | ADPRHL1 | 3.770119 | 6.07E-13 | 12 | 12 | 0.362112 | 17 | 17 | 0.517383 | 14 | 14 | 0.363714 | 33 | 33 | 1.29392 | 40 | 40 | 1.19553 | 63 | 63 | 1.674962 |
| 10 | 88985205..88996665 | NUTM2A | 3.762497 | 4.89E-07 | 10 | 53 | 0.726337 | 4 | 53 | 0.732556 | 8 | 45 | 0.53094 | 13 | 105 | 1.869751 | 22 | 159 | 2.158234 | 35 | 206 | 2.487327 |
| 2 | 99613724..99771427 | TSGA10 | 3.743989 | 1.67E-05 | 6 | 7 | 0.066105 | 7 | 8 | 0.076195 | 4 | 4 | 0.032521 | 11 | 12 | 0.147248 | 15 | 15 | 0.140302 | 28 | 29 | 0.241288 |
| 2 | 75061108..75120486 | HK2 | 3.722241 | 3.08E-84 | 546 | 564 | 6.477643 | 547 | 558 | 6.4636 | 611 | 626 | 6.189885 | 1386 | 1410 | 21.0421 | 1925 | 1978 | 22.50107 | 1965 | 2000 | 20.23816 |
| 16 | 86544133..86548076 | FOXF1 | 3.72047 | 5.8E-84 | 1265 | 1265 | 34.30778 | 1357 | 1357 | 37.11798 | 1502 | 1502 | 35.07053 | 3195 | 3195 | 112.5914 | 4434 | 4434 | 119.1069 | 5215 | 5215 | 124.6119 |
| 3 | 167453031..167543356 | SERPINI1 | 3.717823 | 1.19E-20 | 13 | 13 | 0.374442 | 30 | 30 | 0.871494 | 32 | 32 | 0.793526 | 61 | 61 | 2.282983 | 85 | 85 | 2.424927 | 86 | 86 | 2.18244 |
| 3 | 101546835..101579866 | NFKBIZ | 3.673256 | 7.92E-84 | 92 | 92 | 1.08564 | 123 | 123 | 1.46388 | 121 | 121 | 1.229288 | 279 | 279 | 4.277935 | 338 | 338 | 3.950514 | 409 | 409 | 4.252304 |
| 9 | 108456825..108538893 | TMEM38B | 3.655672 | 3.41E-25 | 64 | 64 | 0.988108 | 94 | 94 | 1.463708 | 150 | 150 | 1.99382 | 259 | 259 | 5.195844 | 340 | 340 | 5.199268 | 318 | 318 | 4.325682 |
| 3 | 39183346..39196053 | CSRNP1 | 3.652561 | 6.44E-54 | 139 | 139 | 3.012077 | 112 | 112 | 2.447776 | 112 | 112 | 2.089487 | 309 | 309 | 8.700452 | 398 | 398 | 8.542271 | 396 | 396 | 7.560483 |
| 3 | 97540884..97594132 | CRYBG3_1 | 3.651716 | 3.63E-95 | 145 | 145 | 2.370029 | 204 | 204 | 3.362932 | 227 | 227 | 3.194345 | 450 | 450 | 9.557189 | 604 | 604 | 9.778259 | 694 | 694 | 9.994203 |
| X | 37208528..37316548 | PRRG1 | 3.648827 | 7.81E-19 | 26 | 137 | 1.543936 | 24 | 172 | 1.954967 | 24 | 212 | 2.056908 | 56 | 368 | 5.388756 | 69 | 543 | 6.061045 | 101 | 605 | 6.007132 |
| 19 | 16435628..16438685 | KLF2 | 3.645798 | 3.05E-65 | 211 | 211 | 7.28213 | 195 | 195 | 6.787548 | 212 | 212 | 6.299153 | 434 | 434 | 19.46246 | 664 | 664 | 22.69776 | 802 | 802 | 24.38672 |
| 6 | 93949738..94129265 | EPHA7 | 3.644342 | 0.04923 | 1 | 1 | 0.009341 | 2 | 2 | 0.018842 | 2 | 2 | 0.016084 | 6 | 6 | 0.072824 | 5 | 5 | 0.046259 | 5 | 5 | 0.041149 |
| 10 | 135267432..135337062 | RP11-108K14.4 | 3.635767 | 5.93E-05 | 3 | 33 | 0.286681 | 6 | 35 | 0.306659 | 6 | 27 | 0.201939 | 15 | 73 | 0.824025 | 20 | 72 | 0.619522 | 11 | 77 | 0.589358 |
| 16 | 81087102..81110872 | C16orf46 | 3.633548 | 0.029602 | 2 | 7 | 0.205793 | 1 | 11 | 0.326157 | 3 | 14 | 0.354348 | 4 | 17 | 0.649401 | 6 | 42 | 1.222983 | 9 | 35 | 0.906574 |

| 5 | 140373..190085 | PLEKHG4B | 3.632362 | 0.018049 | 4 | 4 | 0.022829 | 0 | 0 | 0 | 3 | 3 | 0.014741 | 6 | 6 | 0.044495 | 6 | 6 | 0.033917 | 10 | 10 | 0.050284 |
| --- | --- | --- | --- | --- | --- | --- | --- | --- | --- | --- | --- | --- | --- | --- | --- | --- | --- | --- | --- | --- | --- | --- |
| 7 | 87256864..87461611 | RUNDC3B | 3.630808 | 3.02E-06 | 6 | 9 | 0.133082 | 6 | 7 | 0.104394 | 8 | 10 | 0.127305 | 16 | 17 | 0.326631 | 30 | 32 | 0.468668 | 15 | 15 | 0.195421 |
| 16 | 56666145..56667898 | MT1M | 3.628762 | 5.33E-52 | 79 | 79 | 5.840813 | 85 | 86 | 6.41279 | 75 | 77 | 4.901255 | 176 | 178 | 17.10009 | 258 | 262 | 19.18609 | 292 | 301 | 19.60721 |
| 17 | 4704454..4710308 | RP11-81A22.5 | 3.625208 | 0.018687 | 1 | 1 | 0.123926 | 4 | 4 | 0.499946 | 2 | 2 | 0.213384 | 5 | 5 | 0.805124 | 4 | 4 | 0.490975 | 13 | 13 | 1.419408 |
| 7 | 121715701..121784334 | AASS | 3.617408 | 4.35E-61 | 127 | 127 | 1.926609 | 180 | 181 | 2.769305 | 217 | 217 | 2.834131 | 447 | 447 | 8.811086 | 511 | 512 | 7.693054 | 603 | 605 | 8.086272 |
| 12 | 26490342..26986131 | ITPR2 | 3.616982 | 1.94E-87 | 163 | 203 | 1.192491 | 188 | 229 | 1.35674 | 276 | 329 | 1.663892 | 529 | 619 | 4.724781 | 642 | 750 | 4.363743 | 690 | 807 | 4.176722 |
| 22 | 50354161..50357728 | PIM3 | 3.614683 | 4.16E-50 | 623 | 623 | 17.63086 | 630 | 630 | 17.9816 | 698 | 698 | 17.00636 | 1498 | 1498 | 55.0845 | 2120 | 2120 | 59.42379 | 2267 | 2267 | 56.52495 |
| 19 | 2389769..2426237 | TMPRSS9 | 3.609061 | 2.69E-06 | 6 | 6 | 0.099613 | 8 | 8 | 0.133955 | 7 | 7 | 0.100054 | 11 | 11 | 0.237296 | 31 | 33 | 0.542648 | 22 | 23 | 0.336431 |
| 14 | 68086515..68118437 | ARG2 | 3.608395 | 4.33E-10 | 11 | 15 | 0.432048 | 11 | 17 | 0.493847 | 13 | 24 | 0.595144 | 23 | 38 | 1.422186 | 36 | 46 | 1.312314 | 47 | 72 | 1.827159 |
| 1 | 1846266..1848735 | CALML6 | 3.606761 | 0.000258 | 3 | 3 | 0.090021 | 8 | 8 | 0.242111 | 3 | 3 | 0.077502 | 10 | 10 | 0.389901 | 9 | 9 | 0.267487 | 24 | 24 | 0.634507 |
| 11 | 76092357..76125663 | RP11-111M22.2 | 3.60493 | 4.37E-13 | 10 | 10 | 0.063476 | 15 | 15 | 0.09603 | 25 | 25 | 0.136622 | 51 | 51 | 0.420643 | 49 | 49 | 0.308068 | 49 | 49 | 0.274038 |
| 2 | 185463093..185804219 | ZNF804A | 3.60366 | 7.06E-39 | 62 | 62 | 0.920695 | 66 | 66 | 0.988486 | 54 | 54 | 0.69038 | 161 | 161 | 3.106578 | 196 | 196 | 2.882832 | 187 | 187 | 2.446634 |
| 14 | 23815515..23822121 | SLC22A17 | 3.603013 | 6.24E-59 | 280 | 280 | 4.55842 | 285 | 285 | 4.679544 | 325 | 325 | 4.555227 | 675 | 675 | 14.27882 | 993 | 993 | 16.01196 | 1003 | 1003 | 14.38667 |
| 11 | 66452719..66496697 | SPTBN2 | 3.598364 | 2.96E-13 | 19 | 19 | 0.144921 | 19 | 19 | 0.146162 | 18 | 18 | 0.118201 | 43 | 43 | 0.426166 | 75 | 75 | 0.566603 | 50 | 50 | 0.33601 |
| 5 | 132028320..132073330 | KIF3A | 3.596814 | 4.33E-92 | 103 | 144 | 1.462813 | 97 | 152 | 1.5573 | 121 | 190 | 1.661691 | 263 | 397 | 5.240212 | 329 | 484 | 4.869795 | 366 | 525 | 4.698819 |
| 17 | 3468738..3539543 | SHPK_1 | 3.593787 | 8.38E-07 | 10 | 44 | 0.414112 | 1 | 12 | 0.113907 | 20 | 81 | 0.656328 | 18 | 52 | 0.635918 | 42 | 137 | 1.2771 | 33 | 145 | 1.202366 |
| 15 | 49619159..49913128 | FAM227B | 3.591701 | 7.55E-16 | 19 | 19 | 0.21974 | 23 | 24 | 0.279943 | 26 | 28 | 0.278795 | 53 | 53 | 0.796461 | 88 | 91 | 1.042406 | 62 | 65 | 0.662328 |
| 3 | 173114074..174004434 | NLGN1 | 3.588775 | 3.03E-11 | 9 | 9 | 0.061773 | 14 | 14 | 0.096915 | 18 | 18 | 0.106366 | 44 | 44 | 0.392414 | 36 | 36 | 0.244738 | 42 | 42 | 0.253987 |
| 10 | 15144583..15210692 | NMT2 | 3.588649 | 8.13E-88 | 209 | 295 | 4.062004 | 174 | 250 | 3.471847 | 194 | 282 | 3.343011 | 458 | 611 | 10.9318 | 558 | 774 | 10.55597 | 715 | 948 | 11.50085 |
| 5 | 127419458..127525380 | SLC12A2 | 3.585147 | 1.1E-144 | 236 | 236 | 1.541306 | 290 | 290 | 1.910193 | 315 | 315 | 1.77116 | 710 | 710 | 6.025144 | 893 | 893 | 5.776535 | 884 | 884 | 5.086656 |
| 10 | 89102493..89117639 | LINC00863 | 3.580692 | 4.91E-31 | 51 | 96 | 2.034083 | 48 | 106 | 2.265195 | 48 | 119 | 2.170775 | 101 | 220 | 6.056925 | 155 | 302 | 6.33787 | 185 | 387 | 7.224562 |
| 11 | 119494120..119599794 | PVRL1 | 3.577431 | 8.68E-73 | 156 | 156 | 1.41083 | 165 | 165 | 1.504999 | 175 | 175 | 1.362569 | 387 | 387 | 4.547713 | 532 | 532 | 4.765414 | 557 | 557 | 4.438215 |
| 22 | 36883237..36903148 | FOXRED2 | 3.575496 | 1.35E-90 | 466 | 466 | 5.819456 | 467 | 467 | 5.881874 | 498 | 498 | 5.354219 | 1059 | 1059 | 17.18401 | 1533 | 1533 | 18.96172 | 1694 | 1695 | 18.64959 |
| 21 | 16191164..16254296 | AF127936.7 | 3.569413 | 3.45E-26 | 43 | 43 | 0.425758 | 40 | 40 | 0.399445 | 44 | 44 | 0.375075 | 113 | 113 | 1.453802 | 141 | 141 | 1.382779 | 121 | 121 | 1.055561 |
| 11 | 124609742..124617106 | NRGN | 3.561996 | 5.27E-35 | 50 | 62 | 3.298748 | 48 | 53 | 2.84404 | 52 | 56 | 2.565168 | 115 | 123 | 8.50344 | 157 | 171 | 9.011407 | 173 | 180 | 8.437875 |
| 10 | 133781578..133795435 | BNIP3 | 3.55495 | 2.09E-72 | 478 | 544 | 17.94766 | 461 | 529 | 17.6022 | 556 | 637 | 18.09334 | 1222 | 1423 | 61.00225 | 1588 | 1845 | 60.28986 | 1584 | 1803 | 52.40923 |
| 6 | 27106073..27114619 | HIST1H2BK | 3.554788 | 7E-106 | 185 | 324 | 27.51872 | 204 | 327 | 28.01131 | 279 | 413 | 30.19977 | 500 | 768 | 84.75719 | 661 | 1097 | 92.28453 | 812 | 1294 | 96.83239 |
| 7 | 99752043..99756338 | C7orf43 | 3.547375 | 7.7E-86 | 126 | 180 | 3.8514 | 106 | 178 | 3.841214 | 146 | 206 | 3.794755 | 324 | 428 | 11.89932 | 366 | 516 | 10.9354 | 418 | 589 | 11.10362 |
| 3 | 143690640..143767561 | C3orf58 | 3.54506 | 1.43E-86 | 366 | 366 | 4.645615 | 343 | 343 | 4.390951 | 450 | 450 | 4.917507 | 916 | 916 | 15.1074 | 1265 | 1265 | 15.90346 | 1216 | 1216 | 13.59875 |
| 19 | 18307594..18314884 | RAB3A | 3.533331 | 2.58E-25 | 39 | 39 | 1.494059 | 26 | 26 | 1.004567 | 39 | 39 | 1.286288 | 80 | 80 | 3.98222 | 107 | 107 | 4.06 | 119 | 119 | 4.016551 |
| 7 | 100181605..100198740 | FBXO24 | 3.522842 | 0.000485 | 7 | 10 | 0.207713 | 2 | 3 | 0.062847 | 4 | 6 | 0.107296 | 6 | 13 | 0.350864 | 15 | 23 | 0.473184 | 18 | 27 | 0.494118 |
| 7 | 72023729..72298777 | TYW1B | 3.519736 | 0.001897 | 1 | 1 | 0.020448 | 1 | 1 | 0.020623 | 8 | 11 | 0.193649 | 8 | 11 | 0.292265 | 12 | 15 | 0.303796 | 10 | 13 | 0.234207 |
| 19 | 489176..505347 | MADCAM1 | 3.515226 | 3.64E-07 | 7 | 10 | 0.285318 | 6 | 7 | 0.201433 | 12 | 13 | 0.319332 | 14 | 18 | 0.66732 | 25 | 26 | 0.734754 | 35 | 38 | 0.955248 |
| 10 | 101542489..101611949 | ABCC2 | 3.512895 | 0.008088 | 1 | 1 | 0.011176 | 3 | 3 | 0.033814 | 4 | 4 | 0.038486 | 12 | 12 | 0.174254 | 8 | 8 | 0.088552 | 4 | 4 | 0.039385 |
| 1 | 232533711..232697304 | SIPA1L2 | 3.512218 | 7.85E-84 | 125 | 125 | 1.139349 | 117 | 117 | 1.075561 | 175 | 175 | 1.373268 | 304 | 304 | 3.600415 | 459 | 459 | 4.143798 | 452 | 452 | 3.629848 |
| 11 | 637293..640706 | DRD4 | 3.504915 | 0.004156 | 7 | 7 | 0.330077 | 2 | 2 | 0.095115 | 1 | 1 | 0.040596 | 7 | 7 | 0.428891 | 10 | 10 | 0.467042 | 13 | 13 | 0.540086 |
| 11 | 34172535..34379555 | ABTB2 | 3.503545 | 6.4E-114 | 106 | 106 | 1.484515 | 104 | 104 | 1.468975 | 126 | 126 | 1.519216 | 262 | 262 | 4.767734 | 334 | 334 | 4.63302 | 382 | 382 | 4.713518 |
| 7 | 27145803..27192200 | HOXA3 | 3.49874 | 1.62E-29 | 37 | 101 | 1.633595 | 41 | 108 | 1.76177 | 54 | 113 | 1.573519 | 93 | 266 | 5.590322 | 132 | 371 | 5.943414 | 160 | 415 | 5.913905 |
| 2 | 73340146..73343035 | RP11-44N22.3 | 3.493925 | 0.01102 | 3 | 10 | 1.658242 | 2 | 5 | 0.836219 | 3 | 4 | 0.571055 | 9 | 13 | 2.801065 | 8 | 11 | 1.806673 | 7 | 14 | 2.045403 |
| 6 | 28227098..28228736 | NKAPL | 3.491851 | 2.35E-18 | 30 | 30 | 1.274792 | 21 | 21 | 0.899994 | 34 | 34 | 1.243848 | 54 | 54 | 2.981563 | 102 | 102 | 4.292965 | 92 | 92 | 3.444365 |
| 10 | 105036920..105050108 | INA | 3.489667 | 5.57E-08 | 11 | 11 | 0.237112 | 8 | 8 | 0.173921 | 10 | 10 | 0.18558 | 18 | 18 | 0.504156 | 35 | 35 | 0.747252 | 32 | 32 | 0.607734 |
| 16 | 77756411..77776157 | NUDT7 | 3.48726 | 3.78E-13 | 13 | 31 | 1.437437 | 21 | 31 | 1.449744 | 22 | 44 | 1.756508 | 31 | 69 | 4.157271 | 63 | 100 | 4.59268 | 70 | 121 | 4.943285 |
| 9 | 34398182..34458568 | FAM219A | 3.479701 | 1.54E-84 | 263 | 290 | 5.340398 | 266 | 276 | 5.126099 | 309 | 326 | 5.168488 | 609 | 657 | 15.72074 | 890 | 964 | 17.58295 | 931 | 1019 | 16.53305 |
| 4 | 113066553..113116412 | C4orf32 | 3.476395 | 8.56E-24 | 35 | 38 | 0.297332 | 27 | 28 | 0.220963 | 39 | 40 | 0.269456 | 82 | 82 | 0.833689 | 94 | 95 | 0.736243 | 116 | 116 | 0.799686 |
| 11 | 45907202..45928016 | MAPK8IP1 | 3.47313 | 1.1E-71 | 208 | 273 | 5.435506 | 200 | 269 | 5.401718 | 220 | 279 | 4.782466 | 505 | 619 | 16.01401 | 593 | 759 | 14.9678 | 714 | 920 | 16.13869 |
| 15 | 69452923..69564556 | GLCE | 3.470678 | 1.03E-97 | 294 | 294 | 3.323481 | 340 | 340 | 3.876387 | 418 | 418 | 4.068109 | 821 | 821 | 12.05927 | 1039 | 1039 | 11.63323 | 1161 | 1161 | 11.56329 |
| 10 | 69644427..69678147 | SIRT1 | 3.463603 | 6.69E-98 | 247 | 247 | 3.77996 | 266 | 266 | 4.105577 | 307 | 307 | 4.044818 | 634 | 634 | 12.607 | 819 | 819 | 12.41404 | 904 | 904 | 12.18883 |
| 5 | 142149949..142608576 | ARHGAP26 | 3.461441 | 7.55E-33 | 58 | 58 | 0.302651 | 42 | 42 | 0.221037 | 69 | 69 | 0.309979 | 133 | 133 | 0.901773 | 152 | 152 | 0.78559 | 201 | 201 | 0.924087 |
| 11 | 18714669..18726332 | TMEM86A | 3.454691 | 2.62E-11 | 15 | 15 | 0.246215 | 12 | 12 | 0.198659 | 21 | 22 | 0.310897 | 35 | 35 | 0.74649 | 62 | 64 | 1.040502 | 41 | 43 | 0.621864 |

| 6 | 97242002..97285353 | GPR63 | 3.452714 | 0.000405 | 4 | 5 | 0.057237 | 11 | 12 | 0.138545 | 1 | 3 | 0.029566 | 8 | 10 | 0.148744 | 23 | 23 | 0.26078 | 16 | 18 | 0.181545 |
| --- | --- | --- | --- | --- | --- | --- | --- | --- | --- | --- | --- | --- | --- | --- | --- | --- | --- | --- | --- | --- | --- | --- |
| 5 | 132208014..132210738 | LEAP2 | 3.442854 | 0.046024 | 2 | 2 | 0.057918 | 3 | 3 | 0.08762 | 1 | 1 | 0.024932 | 4 | 4 | 0.150513 | 5 | 5 | 0.143414 | 9 | 9 | 0.229629 |
| 13 | 78272023..78338377 | SLAIN1 | 3.440568 | 3.19E-05 | 4 | 4 | 0.069076 | 6 | 6 | 0.104501 | 8 | 8 | 0.11894 | 20 | 20 | 0.448777 | 10 | 10 | 0.171044 | 22 | 22 | 0.33473 |
| 5 | 159678659..159772403 | CCNJL | 3.439525 | 0.000781 | 4 | 4 | 0.058885 | 2 | 2 | 0.029695 | 6 | 6 | 0.076044 | 13 | 13 | 0.248668 | 7 | 7 | 0.102066 | 15 | 15 | 0.194553 |
| 19 | 42470734..42501649 | ATP1A3 | 3.437606 | 0.012256 | 6 | 6 | 0.082438 | 2 | 2 | 0.027715 | 3 | 3 | 0.035487 | 1 | 1 | 0.017853 | 17 | 17 | 0.231346 | 15 | 15 | 0.181581 |
| 4 | 952675..980683 | DGKQ | 3.426072 | 7.87E-98 | 391 | 391 | 5.479204 | 337 | 337 | 4.762916 | 446 | 446 | 5.380789 | 912 | 912 | 16.6061 | 1155 | 1155 | 16.03104 | 1265 | 1265 | 15.61832 |
| 11 | 125034583..125303285 | PKNOX2 | 3.41803 | 6.99E-05 | 6 | 6 | 0.063915 | 5 | 5 | 0.053719 | 6 | 6 | 0.055027 | 16 | 16 | 0.221465 | 13 | 13 | 0.137162 | 20 | 20 | 0.187709 |
| 20 | 8112824..8949003 | PLCB1 | 3.402703 | 1.12E-72 | 202 | 202 | 1.285736 | 218 | 218 | 1.399456 | 253 | 253 | 1.386409 | 501 | 501 | 4.143527 | 623 | 623 | 3.927602 | 782 | 782 | 4.385411 |
| 3 | 145787227..145881440 | PLOD2 | 3.401383 | 5.68E-71 | 608 | 793 | 7.223306 | 687 | 926 | 8.506994 | 925 | 1249 | 9.794801 | 1735 | 2388 | 28.26371 | 2219 | 3028 | 27.31855 | 2241 | 3167 | 25.4164 |
| 4 | 74735110..74736959 | CXCL1 | 3.399898 | 0.003071 | 0 | 0 | 0 | 4 | 4 | 0.216798 | 6 | 6 | 0.277596 | 6 | 6 | 0.418963 | 15 | 15 | 0.798403 | 8 | 8 | 0.378778 |
| 17 | 73772515..73781974 | H3F3B | 3.387935 | 7.27E-77 | 3277 | 3391 | 74.73737 | 3056 | 3210 | 71.35385 | 3487 | 3672 | 69.67597 | 7416 | 7853 | 224.8939 | 10040 | 10665 | 232.8144 | 10213 | 10858 | 210.8449 |
| X | 100652791..100662913 | GLA | 3.382216 | 8.79E-38 | 64 | 83 | 2.799337 | 70 | 100 | 3.40157 | 80 | 115 | 3.339222 | 146 | 190 | 8.326505 | 231 | 285 | 9.520526 | 226 | 290 | 8.617438 |
| 8 | 145539954..145550573 | DGAT1 | 3.373438 | 8.92E-83 | 257 | 257 | 7.381056 | 225 | 225 | 6.517338 | 309 | 309 | 7.640367 | 595 | 595 | 22.20416 | 753 | 753 | 21.41999 | 865 | 865 | 21.88793 |
| 2 | 106709759..106810795 | UXS1 | 3.365693 | 2.82E-91 | 332 | 332 | 3.236182 | 398 | 398 | 3.912734 | 434 | 434 | 3.642126 | 863 | 863 | 10.93044 | 1102 | 1102 | 10.63936 | 1292 | 1292 | 11.09585 |
| 11 | 65339820..65341669 | FAM89B | 3.364984 | 7.19E-79 | 221 | 839 | 40.07759 | 207 | 737 | 35.50663 | 242 | 841 | 34.58645 | 514 | 1688 | 104.7717 | 659 | 2173 | 102.8107 | 697 | 2260 | 95.11547 |
| 3 | 67048727..67061634 | KBTBD8 | 3.363519 | 1.95E-06 | 11 | 11 | 0.161626 | 2 | 2 | 0.029638 | 12 | 12 | 0.1518 | 27 | 27 | 0.515483 | 18 | 18 | 0.261957 | 25 | 25 | 0.32364 |
| 17 | 7387685..7417933 | POLR2A | 3.358717 | 3.65E-72 | 4486 | 4486 | 37.40364 | 3996 | 3996 | 33.60334 | 4786 | 4786 | 34.35561 | 9650 | 9650 | 104.5476 | 12613 | 12613 | 104.1627 | 14975 | 14975 | 110.0081 |
| 10 | 103544200..103578696 | MGEA5 | 3.344615 | 3.57E-53 | 1299 | 1299 | 11.90086 | 1467 | 1467 | 13.55507 | 1686 | 1686 | 13.29833 | 3387 | 3387 | 40.31963 | 4306 | 4306 | 39.0735 | 4622 | 4622 | 37.30803 |
| 12 | 31824071..31882108 | AMN1 | 3.344449 | 1.28E-10 | 18 | 18 | 0.392373 | 12 | 17 | 0.373747 | 14 | 19 | 0.356574 | 36 | 49 | 1.387888 | 34 | 47 | 1.014759 | 53 | 65 | 1.248368 |
| 20 | 33516236..33543620 | GSS | 3.342442 | 5.24E-50 | 527 | 527 | 15.78646 | 508 | 508 | 15.34759 | 637 | 637 | 16.42797 | 1276 | 1276 | 49.66574 | 1578 | 1578 | 46.81879 | 1773 | 1773 | 46.79355 |
| X | 153759606..153775787 | G6PD | 3.33221 | 9.7E-82 | 4046 | 4052 | 76.08687 | 3778 | 3782 | 71.62492 | 4488 | 4492 | 72.61902 | 8617 | 8624 | 210.4171 | 11967 | 11980 | 222.8107 | 13743 | 13756 | 227.5808 |
| 8 | 145162629..145173218 | KIAA1875 | 3.32646 | 0.003882 | 1 | 1 | 0.007767 | 9 | 9 | 0.070501 | 2 | 2 | 0.013374 | 9 | 9 | 0.090829 | 8 | 8 | 0.061543 | 17 | 17 | 0.116333 |
| 12 | 39687030..39837192 | KIF21A | 3.324785 | 4.25E-29 | 46 | 46 | 0.315824 | 39 | 39 | 0.270057 | 57 | 57 | 0.336925 | 110 | 110 | 0.981324 | 128 | 128 | 0.870436 | 154 | 154 | 0.931562 |
| 2 | 223916532..224063117 | KCNE4 | 3.324201 | 3.12E-36 | 57 | 57 | 0.962617 | 73 | 73 | 1.243379 | 79 | 80 | 1.163158 | 157 | 157 | 3.445166 | 216 | 216 | 3.613027 | 203 | 205 | 3.05025 |
| 9 | 131062367..131064212 | AL359091.2 | 3.31049 | 0.041992 | 2 | 2 | 0.075456 | 1 | 1 | 0.038051 | 4 | 4 | 0.129926 | 6 | 6 | 0.294136 | 6 | 6 | 0.22421 | 8 | 8 | 0.265925 |
| 1 | 212738676..212794119 | ATF3 | 3.303006 | 1.51E-33 | 48 | 48 | 0.835127 | 55 | 55 | 0.965109 | 75 | 75 | 1.123423 | 139 | 139 | 3.142378 | 162 | 162 | 2.791679 | 186 | 186 | 2.851199 |
| 2 | 27476552..27498685 | SLC30A3 | 3.302251 | 0.005725 | 5 | 5 | 0.058252 | 3 | 3 | 0.03525 | 3 | 3 | 0.030091 | 5 | 5 | 0.075691 | 13 | 13 | 0.150011 | 13 | 13 | 0.133441 |
| 7 | 99195689..99208439 | GS1-259H13.2 | 3.300348 | 0.000735 | 4 | 11 | 0.539893 | 5 | 10 | 0.495014 | 5 | 7 | 0.29579 | 16 | 19 | 1.211715 | 8 | 12 | 0.583358 | 15 | 23 | 0.994594 |
| 15 | 84867600..84898888 | GOLGA2P7 | 3.298302 | 4.85E-17 | 44 | 270 | 3.496553 | 26 | 211 | 2.755885 | 26 | 255 | 2.843065 | 62 | 457 | 7.689969 | 93 | 615 | 7.888428 | 111 | 732 | 8.352001 |
| 1 | 180601140..180859387 | XPR1 | 3.294517 | 1.1E-112 | 405 | 405 | 3.168223 | 489 | 489 | 3.858086 | 635 | 635 | 4.276661 | 1052 | 1052 | 10.69322 | 1466 | 1466 | 11.35883 | 1660 | 1660 | 11.44121 |
| 10 | 133918175..133998313 | JAKMIP3 | 3.292005 | 0.000186 | 7 | 7 | 0.06408 | 4 | 6 | 0.055396 | 6 | 8 | 0.06305 | 19 | 21 | 0.249792 | 15 | 19 | 0.172274 | 13 | 15 | 0.120982 |
| 19 | 13001840..13025021 | GCDH | 3.29159 | 6.69E-52 | 184 | 193 | 3.249929 | 143 | 166 | 2.819207 | 154 | 173 | 2.508032 | 334 | 370 | 8.095625 | 463 | 501 | 8.355902 | 531 | 593 | 8.797807 |
| 9 | 129677053..129985445 | RALGPS1 | 3.289908 | 2.28E-18 | 24 | 40 | 0.265142 | 26 | 47 | 0.314209 | 33 | 46 | 0.26251 | 64 | 99 | 0.852679 | 80 | 128 | 0.840364 | 83 | 126 | 0.735855 |
| 11 | 66615704..66725847 | PC | 3.280843 | 3.9E-69 | 514 | 514 | 6.039838 | 419 | 419 | 4.965678 | 517 | 517 | 5.230258 | 1022 | 1022 | 15.60433 | 1426 | 1426 | 16.59666 | 1521 | 1521 | 15.74688 |
| 12 | 125478246..125515777 | BRI3BP | 3.278748 | 6.19E-41 | 81 | 81 | 0.848577 | 79 | 79 | 0.83471 | 112 | 112 | 1.01017 | 183 | 183 | 2.491089 | 247 | 247 | 2.562961 | 313 | 313 | 2.88904 |
| X | 149106846..149392815 | LINC00894 | 3.278309 | 4.98E-07 | 9 | 15 | 0.165221 | 10 | 15 | 0.166636 | 9 | 16 | 0.151727 | 21 | 31 | 0.443678 | 24 | 30 | 0.327291 | 32 | 46 | 0.446411 |
| 17 | 7120444..7128592 | ACADVL | 3.272873 | 1.01E-53 | 2083 | 2083 | 30.79451 | 1923 | 1923 | 28.6725 | 2311 | 2311 | 29.41401 | 4658 | 4658 | 89.47786 | 6060 | 6060 | 88.73514 | 6437 | 6437 | 83.84374 |
| 4 | 37592422..37687998 | RELL1 | 3.26324 | 2.33E-57 | 105 | 113 | 4.042124 | 83 | 90 | 3.246953 | 109 | 118 | 3.633988 | 218 | 242 | 11.24809 | 280 | 308 | 10.91242 | 307 | 332 | 10.46339 |
| 2 | 10085341..10142411 | GRHL1 | 3.26139 | 3.3E-05 | 4 | 5 | 0.043485 | 7 | 7 | 0.061401 | 8 | 8 | 0.059901 | 18 | 18 | 0.203412 | 20 | 20 | 0.172283 | 14 | 14 | 0.107276 |
| 15 | 40650436..40663257 | DISP2 | 3.258921 | 4.6E-12 | 13 | 13 | 0.175092 | 27 | 29 | 0.393933 | 25 | 33 | 0.382655 | 34 | 34 | 0.595023 | 68 | 72 | 0.960493 | 76 | 84 | 0.996793 |
| 15 | 55903744..56035288 | PRTG | 3.253792 | 2E-14 | 16 | 16 | 0.077449 | 18 | 18 | 0.087876 | 31 | 31 | 0.12919 | 48 | 48 | 0.301905 | 57 | 57 | 0.273282 | 71 | 71 | 0.302802 |
| 3 | 195473636..195539148 | MUC4 | 3.25272 | 0.016235 | 4 | 4 | 0.013064 | 2 | 2 | 0.006588 | 3 | 3 | 0.008435 | 8 | 8 | 0.033949 | 13 | 13 | 0.042052 | 4 | 4 | 0.01151 |
| 11 | 112831997..113149158 | NCAM1 | 3.247727 | 1.59E-17 | 26 | 29 | 0.158188 | 26 | 27 | 0.148539 | 35 | 35 | 0.164366 | 52 | 54 | 0.382737 | 88 | 90 | 0.486246 | 96 | 97 | 0.466175 |
| 17 | 80036214..80056208 | FASN | 3.247718 | 1.67E-88 | 24614 | 24614 | 190.92 | 21822 | 21822 | 170.7128 | 24787 | 24787 | 165.5249 | 51115 | 51115 | 515.1688 | 67939 | 67939 | 521.9481 | 74076 | 74077 | 506.2391 |
| 20 | 44518783..44527459 | CTSA | 3.239757 | 8.72E-83 | 5764 | 5962 | 70.90682 | 5863 | 6105 | 73.22916 | 6904 | 7181 | 73.52776 | 12549 | 12953 | 200.1698 | 17077 | 17517 | 206.3454 | 20592 | 21210 | 222.249 |
| 18 | 19230858..19284766 | ABHD3 | 3.236247 | 2.34E-21 | 29 | 29 | 0.462606 | 30 | 30 | 0.482655 | 44 | 44 | 0.604277 | 75 | 75 | 1.554557 | 96 | 96 | 1.516784 | 106 | 106 | 1.489781 |
| 9 | 107543283..107690518 | ABCA1 | 3.235562 | 1.78E-90 | 510 | 526 | 3.227654 | 558 | 574 | 3.552348 | 728 | 738 | 3.898773 | 1259 | 1280 | 10.20571 | 1742 | 1766 | 10.73324 | 1806 | 1831 | 9.899032 |
| 7 | 27139721..27142430 | HOXA2 | 3.232355 | 5.24E-19 | 33 | 36 | 1.213583 | 25 | 25 | 0.849981 | 34 | 34 | 0.98677 | 61 | 62 | 2.715755 | 88 | 88 | 2.938248 | 99 | 103 | 3.059195 |
| 7 | 21467652..21554440 | SP4 | 3.224046 | 2.32E-25 | 50 | 50 | 0.558599 | 42 | 42 | 0.473241 | 66 | 66 | 0.634811 | 104 | 104 | 1.509718 | 133 | 133 | 1.471706 | 188 | 188 | 1.850509 |

| 11 | 67820326..67888911 | CHKA | 3.21621 | 8.5E-48 | 106 | 151 | 2.712553 | 92 | 141 | 2.554599 | 111 | 157 | 2.428127 | 230 | 320 | 7.46936 | 278 | 380 | 6.761202 | 317 | 430 | 6.805702 |
| --- | --- | --- | --- | --- | --- | --- | --- | --- | --- | --- | --- | --- | --- | --- | --- | --- | --- | --- | --- | --- | --- | --- |
| 1 | 53711217..53793742 | LRP8 | 3.210533 | 2.2E-118 | 139 | 139 | 1.367926 | 140 | 142 | 1.409414 | 176 | 176 | 1.491183 | 343 | 346 | 4.424417 | 421 | 421 | 4.103638 | 444 | 447 | 3.875775 |
| 1 | 11086580..11107290 | MASP2 | 3.209764 | 4.18E-05 | 4 | 4 | 0.065534 | 5 | 5 | 0.082619 | 11 | 11 | 0.155156 | 14 | 14 | 0.298034 | 16 | 16 | 0.259636 | 24 | 24 | 0.346434 |
| 14 | 28733596..28735180 | BNIP3P1 | 3.200396 | 3.61E-07 | 9 | 11 | 0.492991 | 7 | 11 | 0.497211 | 15 | 20 | 0.771696 | 20 | 29 | 1.688792 | 35 | 48 | 2.13072 | 28 | 36 | 1.421516 |
| 2 | 19167729..19546509 | AC092594.1 | 3.198219 | 0.008426 | 2 | 2 | 0.047011 | 6 | 6 | 0.142239 | 3 | 3 | 0.06071 | 6 | 6 | 0.183252 | 10 | 10 | 0.232812 | 14 | 14 | 0.289932 |
| 8 | 145754563..145911194 | ARHGAP39 | 3.18706 | 1.33E-35 | 78 | 78 | 1.083879 | 62 | 62 | 0.868921 | 75 | 75 | 0.897259 | 155 | 155 | 2.798658 | 190 | 190 | 2.615042 | 225 | 225 | 2.754683 |
| 17 | 28256218..28435470 | EFCAB5 | 3.186057 | 0.039781 | 6 | 6 | 0.060317 | 1 | 1 | 0.010139 | 1 | 1 | 0.008655 | 2 | 2 | 0.026125 | 9 | 9 | 0.089613 | 11 | 11 | 0.097428 |
| 3 | 185764097..185828107 | ETV5 | 3.185734 | 9.91E-72 | 243 | 256 | 3.072977 | 309 | 326 | 3.946747 | 385 | 401 | 4.144137 | 638 | 665 | 10.37225 | 841 | 867 | 10.30807 | 997 | 1044 | 11.04137 |
| 1 | 70876901..70905534 | CTH | 3.179373 | 3.51E-08 | 7 | 7 | 0.201957 | 22 | 22 | 0.640155 | 14 | 14 | 0.347743 | 22 | 22 | 0.824735 | 48 | 48 | 1.37164 | 45 | 45 | 1.143867 |
| X | 84498997..84528368 | ZNF711 | 3.164885 | 1.09E-06 | 7 | 7 | 0.096635 | 14 | 14 | 0.194924 | 8 | 8 | 0.095082 | 20 | 20 | 0.358755 | 26 | 26 | 0.355507 | 31 | 31 | 0.377052 |
| 2 | 75167385..75169797 | AC104135.4 | 3.162384 | 1.1E-08 | 10 | 10 | 0.550128 | 7 | 7 | 0.388386 | 21 | 21 | 0.994611 | 31 | 31 | 2.215936 | 34 | 34 | 1.852599 | 35 | 35 | 1.696425 |
| X | 51232863..51239448 | NUDT11 | 3.155682 | 2.84E-41 | 82 | 107 | 3.124586 | 99 | 120 | 3.53421 | 94 | 124 | 3.117459 | 190 | 245 | 9.296231 | 261 | 339 | 9.804996 | 271 | 345 | 8.876279 |
| 1 | 33789224..33896653 | PHC2 | 3.15258 | 6.5E-75 | 1008 | 1834 | 23.61017 | 911 | 1689 | 21.92966 | 995 | 1907 | 21.13591 | 1978 | 3692 | 61.75806 | 2676 | 4934 | 62.91265 | 3040 | 5648 | 64.06158 |
| 17 | 70117161..70122561 | SOX9 | 3.146453 | 2.84E-27 | 98 | 633 | 11.20356 | 57 | 575 | 10.26414 | 91 | 637 | 9.706489 | 159 | 1108 | 25.48145 | 223 | 1586 | 27.80319 | 265 | 1808 | 28.19382 |
| 1 | 46505812..46642160 | PIK3R3 | 3.144788 | 1.64E-41 | 84 | 84 | 0.762152 | 102 | 102 | 0.933393 | 105 | 105 | 0.820204 | 220 | 220 | 2.593683 | 255 | 255 | 2.291613 | 283 | 283 | 2.262308 |
| 11 | 14665269..14892350 | PDE3B | 3.143738 | 2.57E-47 | 95 | 95 | 0.632119 | 103 | 103 | 0.691217 | 123 | 123 | 0.704613 | 233 | 233 | 2.01448 | 276 | 276 | 1.818959 | 328 | 328 | 1.922879 |
| 10 | 120789228..120793854 | NANOS1 | 3.143252 | 2.73E-19 | 37 | 37 | 0.556928 | 24 | 24 | 0.364344 | 42 | 42 | 0.544274 | 76 | 76 | 1.486426 | 87 | 87 | 1.297047 | 106 | 106 | 1.405745 |
| 13 | 52026503..52126500 | INTS6-AS1 | 3.142593 | 0.002611 | 7 | 10 | 0.109283 | 1 | 3 | 0.033066 | 4 | 6 | 0.056451 | 9 | 12 | 0.170399 | 14 | 21 | 0.227306 | 9 | 23 | 0.221454 |
| 22 | 38054734..38062941 | PDXP | 3.142538 | 6.73E-08 | 14 | 104 | 3.28788 | 18 | 109 | 3.475453 | 7 | 99 | 2.694562 | 26 | 172 | 7.065504 | 30 | 246 | 7.702944 | 47 | 295 | 8.216896 |
| 17 | 43037061..43045439 | C1QL1 | 3.140093 | 2.28E-24 | 45 | 45 | 2.420137 | 41 | 41 | 2.223891 | 46 | 46 | 2.129882 | 91 | 91 | 6.359176 | 122 | 122 | 6.498695 | 132 | 132 | 6.25467 |
| 17 | 19551449..19580911 | ALDH3A2 | 3.140009 | 5.55E-45 | 176 | 176 | 2.457935 | 149 | 149 | 2.098681 | 202 | 202 | 2.428731 | 395 | 395 | 7.167817 | 502 | 502 | 6.943852 | 466 | 466 | 5.733856 |
| 1 | 113454469..113499635 | SLC16A1 | 3.13417 | 2.17E-91 | 350 | 350 | 3.786293 | 394 | 394 | 4.298775 | 496 | 496 | 4.619534 | 849 | 849 | 11.934 | 1129 | 1129 | 12.09704 | 1242 | 1242 | 11.8378 |
| 12 | 40148823..40499891 | SLC2A13 | 3.13117 | 3E-23 | 92 | 148 | 1.027987 | 71 | 157 | 1.099836 | 77 | 174 | 1.040509 | 176 | 352 | 3.17688 | 247 | 477 | 3.281584 | 200 | 421 | 2.576388 |
| 14 | 94612465..94746072 | PPP4R4 | 3.12595 | 4.42E-12 | 21 | 21 | 0.294043 | 18 | 18 | 0.254195 | 20 | 20 | 0.241097 | 39 | 39 | 0.709558 | 53 | 53 | 0.735032 | 62 | 62 | 0.764867 |
| 22 | 43562628..43583139 | TTLL12 | 3.123317 | 6.2E-102 | 956 | 956 | 14.40539 | 785 | 785 | 11.92996 | 920 | 920 | 11.93508 | 1753 | 1753 | 34.32268 | 2493 | 2493 | 37.20733 | 2720 | 2720 | 36.11097 |
| 6 | 31825436..31830683 | NEU1 | 3.122071 | 5.82E-20 | 1046 | 1046 | 15.10781 | 1052 | 1052 | 15.32456 | 1335 | 1335 | 16.60051 | 2416 | 2416 | 45.34182 | 3024 | 3024 | 43.26042 | 3430 | 3430 | 43.64828 |
| 1 | 110276554..110284384 | GSTM3 | 3.121921 | 2.14E-68 | 212 | 332 | 4.780344 | 221 | 318 | 4.617963 | 304 | 438 | 5.429571 | 502 | 643 | 12.02996 | 650 | 817 | 11.65151 | 755 | 1008 | 12.78747 |
| 1 | 317720..453948 | RP4-669L17.10 | 3.120178 | 0.000937 | 4 | 21 | 0.212923 | 3 | 56 | 0.572656 | 9 | 175 | 1.527608 | 12 | 59 | 0.777298 | 20 | 43 | 0.431828 | 10 | 48 | 0.428793 |
| 9 | 78505560..78977255 | PCSK5 | 3.117762 | 2.04E-29 | 59 | 59 | 0.323426 | 60 | 60 | 0.331723 | 72 | 72 | 0.339801 | 150 | 150 | 1.068429 | 171 | 171 | 0.928448 | 171 | 171 | 0.825889 |
| 12 | 57910371..57914300 | DDIT3 | 3.116019 | 1.77E-36 | 112 | 508 | 30.03416 | 88 | 419 | 24.98436 | 122 | 467 | 23.77054 | 249 | 837 | 64.29976 | 289 | 1175 | 68.80638 | 289 | 1225 | 63.81034 |
| 7 | 150745379..150749843 | ASIC3 | 3.111633 | 0.033746 | 3 | 3 | 0.076033 | 3 | 3 | 0.076684 | 3 | 3 | 0.065459 | 4 | 4 | 0.131726 | 9 | 9 | 0.225924 | 11 | 11 | 0.245627 |
| 20 | 4833002..4990939 | SLC23A2 | 3.110294 | 3.59E-88 | 429 | 429 | 3.97158 | 492 | 492 | 4.593815 | 595 | 595 | 4.742347 | 1090 | 1090 | 13.11187 | 1319 | 1319 | 12.09455 | 1484 | 1484 | 12.1044 |
| 9 | 27546544..27573864 | C9orf72 | 3.109788 | 2.56E-16 | 21 | 21 | 0.241308 | 23 | 23 | 0.266553 | 40 | 40 | 0.395716 | 57 | 57 | 0.851059 | 80 | 80 | 0.910504 | 80 | 80 | 0.809927 |
| 19 | 33469499..33555794 | RHPN2 | 3.109695 | 1.45E-11 | 24 | 25 | 0.362438 | 15 | 16 | 0.233946 | 32 | 36 | 0.449332 | 35 | 38 | 0.71583 | 76 | 79 | 1.134384 | 74 | 83 | 1.06017 |
| 16 | 25078258..25080264 | RP11-266L9.5 | 3.104912 | 0.000814 | 5 | 5 | 0.185723 | 5 | 5 | 0.187313 | 6 | 7 | 0.223854 | 8 | 9 | 0.434381 | 18 | 21 | 0.772599 | 16 | 18 | 0.589076 |
| 16 | 2587965..2653189 | PDPK1 | 3.102834 | 6.31E-80 | 446 | 721 | 4.594225 | 471 | 730 | 4.691397 | 640 | 953 | 5.228056 | 1020 | 1598 | 13.23079 | 1441 | 2140 | 13.50609 | 1543 | 2352 | 13.20436 |
| 17 | 72209653..72258155 | TTYH2 | 3.102553 | 1.29E-05 | 8 | 14 | 0.181539 | 9 | 11 | 0.143859 | 8 | 10 | 0.111638 | 20 | 32 | 0.539168 | 24 | 31 | 0.398146 | 21 | 41 | 0.468413 |
| 2 | 64319786..64371588 | PELI1 | 3.08948 | 4.24E-23 | 36 | 47 | 0.793544 | 36 | 39 | 0.66411 | 68 | 76 | 1.104732 | 97 | 114 | 2.500979 | 127 | 155 | 2.592053 | 134 | 165 | 2.454484 |
| 4 | 75858305..75975325 | PARM1 | 3.088758 | 0.00346 | 2 | 3 | 0.041505 | 3 | 8 | 0.111629 | 8 | 9 | 0.1072 | 8 | 10 | 0.179769 | 14 | 15 | 0.205548 | 12 | 18 | 0.219412 |
| 14 | 101426846..101433377 | AL132709.8 | 3.080652 | 0.00129 | 5 | 5 | 0.259486 | 4 | 4 | 0.209366 | 6 | 6 | 0.268081 | 13 | 13 | 0.876637 | 12 | 12 | 0.616829 | 14 | 14 | 0.640141 |
| 14 | 24641062..24649463 | REC8 | 3.078607 | 7.4E-11 | 17 | 17 | 0.308249 | 25 | 25 | 0.457188 | 14 | 14 | 0.21855 | 40 | 40 | 0.942421 | 48 | 48 | 0.862051 | 56 | 56 | 0.894631 |
| 1 | 150533480..150533969 | ADAMTSL4-AS1 | 3.077607 | 0.002893 | 7 | 7 | 0.994945 | 7 | 7 | 1.003463 | 1 | 1 | 0.122369 | 15 | 15 | 2.770285 | 9 | 9 | 1.267017 | 15 | 15 | 1.878432 |
| 9 | 86451613..86536342 | KIF27 | 3.075895 | 3.97E-18 | 37 | 46 | 0.627935 | 33 | 42 | 0.57824 | 37 | 51 | 0.599373 | 86 | 101 | 1.791472 | 82 | 103 | 1.392621 | 105 | 141 | 1.695817 |
| 16 | 56700643..56701977 | MT1G | 3.07329 | 0.000364 | 3 | 3 | 0.278585 | 5 | 5 | 0.468283 | 9 | 9 | 0.71953 | 12 | 12 | 1.447935 | 17 | 17 | 1.563593 | 15 | 15 | 1.227242 |
| 4 | 47487305..47595503 | ATP10D | 3.070538 | 3.44E-79 | 329 | 372 | 3.252777 | 415 | 459 | 4.047868 | 513 | 569 | 4.283452 | 848 | 960 | 10.90723 | 1135 | 1244 | 10.77384 | 1206 | 1370 | 10.55444 |
| 16 | 19513015..19533467 | GDE1 | 3.06967 | 3.02E-98 | 865 | 913 | 14.41227 | 826 | 877 | 13.96251 | 1132 | 1214 | 16.49873 | 1981 | 2091 | 42.88918 | 2496 | 2672 | 41.77698 | 2665 | 2853 | 39.67953 |
| 12 | 79257773..79845788 | SYT1 | 3.067248 | 1.13E-09 | 23 | 44 | 0.471886 | 12 | 30 | 0.324495 | 16 | 34 | 0.313931 | 33 | 64 | 0.89186 | 39 | 82 | 0.871039 | 59 | 113 | 1.067742 |
| 8 | 61591337..61779465 | CHD7 | 3.065397 | 7.98E-09 | 18 | 18 | 0.098417 | 15 | 15 | 0.082716 | 12 | 12 | 0.056487 | 38 | 38 | 0.269968 | 35 | 35 | 0.189541 | 42 | 42 | 0.202324 |
| 4 | 56212276..56239263 | SRD5A3 | 3.057285 | 3.65E-21 | 35 | 64 | 1.008451 | 69 | 106 | 1.684547 | 72 | 116 | 1.573632 | 124 | 186 | 3.808201 | 140 | 218 | 3.402282 | 182 | 257 | 3.567887 |

| 1 | 27320198..27327389 | TRNP1 | 3.057188 | 8.17E-75 | 758 | 758 | 26.71649 | 740 | 740 | 26.30536 | 834 | 834 | 25.30734 | 1591 | 1591 | 72.8639 | 2112 | 2112 | 73.72981 | 2222 | 2222 | 69.00131 |
| --- | --- | --- | --- | --- | --- | --- | --- | --- | --- | --- | --- | --- | --- | --- | --- | --- | --- | --- | --- | --- | --- | --- |
| 19 | 18390563..18392432 | JUND | 3.042318 | 1.58E-56 | 4094 | 4094 | 152.4767 | 3626 | 3626 | 136.2027 | 3545 | 3545 | 113.669 | 7404 | 7404 | 358.3059 | 10298 | 10298 | 379.8809 | 11155 | 11155 | 366.0397 |
| 18 | 47087069..47119272 | LIPG | 3.037204 | 0.003223 | 2 | 2 | 0.02448 | 4 | 4 | 0.04938 | 8 | 8 | 0.084303 | 8 | 8 | 0.127235 | 10 | 10 | 0.121234 | 18 | 18 | 0.194116 |
| 1 | 155036224..155060014 | EFNA3_2 | 3.034567 | 3.79E-05 | 14 | 19 | 0.693178 | 7 | 9 | 0.331159 | 4 | 9 | 0.282686 | 14 | 18 | 0.853288 | 20 | 32 | 1.156326 | 30 | 40 | 1.285743 |
| X | 151121596..151143152 | GABRE | 3.0337 | 2.05E-07 | 16 | 16 | 0.115703 | 11 | 11 | 0.080227 | 10 | 10 | 0.062258 | 25 | 25 | 0.234908 | 30 | 30 | 0.214875 | 39 | 39 | 0.248481 |
| 17 | 36827961..36831187 | C17orf96 | 3.03324 | 3.6E-06 | 7 | 7 | 0.151076 | 7 | 7 | 0.15237 | 14 | 14 | 0.260134 | 21 | 21 | 0.588911 | 26 | 26 | 0.55579 | 24 | 24 | 0.456365 |
| 5 | 176022803..176037134 | GPRIN1 | 3.02565 | 6.75E-61 | 171 | 172 | 2.844725 | 201 | 201 | 3.35282 | 179 | 179 | 2.548797 | 370 | 370 | 7.951438 | 489 | 489 | 8.010502 | 531 | 531 | 7.737658 |
| 17 | 56160776..56172897 | DYNLL2 | 3.015355 | 2.03E-95 | 1343 | 1343 | 13.74501 | 1518 | 1518 | 15.66907 | 1635 | 1635 | 14.40645 | 2971 | 2971 | 39.5097 | 4116 | 4116 | 41.72375 | 4181 | 4181 | 37.70095 |
| 2 | 86667770..86719839 | KDM3A | 3.007643 | 6.11E-70 | 293 | 293 | 1.520251 | 267 | 267 | 1.397208 | 388 | 388 | 1.733204 | 630 | 630 | 4.247371 | 828 | 828 | 4.25517 | 901 | 901 | 4.118845 |
| 10 | 46111043..46168228 | ZFAND4 | 3.006669 | 6.43E-15 | 33 | 33 | 0.374442 | 24 | 24 | 0.274653 | 28 | 28 | 0.273526 | 59 | 59 | 0.86987 | 67 | 67 | 0.752981 | 87 | 87 | 0.869746 |
| 2 | 157180944..157198860 | NR4A2 | 3.00555 | 2.33E-20 | 40 | 40 | 0.702255 | 46 | 46 | 0.814507 | 40 | 40 | 0.604596 | 77 | 77 | 1.756539 | 119 | 119 | 2.069288 | 120 | 120 | 1.856177 |
| 16 | 50186829..50269221 | PAPD5 | 2.999869 | 3.5E-47 | 142 | 142 | 1.214361 | 151 | 151 | 1.302383 | 219 | 219 | 1.612404 | 355 | 355 | 3.944753 | 451 | 451 | 3.820101 | 459 | 459 | 3.4584 |
| 3 | 4535032..4889524 | ITPR1 | 2.999698 | 3.17E-66 | 277 | 291 | 1.570844 | 317 | 327 | 1.780288 | 417 | 445 | 2.068095 | 682 | 732 | 5.134324 | 888 | 935 | 4.999087 | 932 | 988 | 4.698943 |
| 7 | 99933702..99949523 | STAG3L5P | 2.999399 | 0.000417 | 10 | 36 | 0.894173 | 5 | 33 | 0.826676 | 4 | 32 | 0.684289 | 14 | 75 | 2.420541 | 16 | 90 | 2.214117 | 18 | 104 | 2.275913 |
| 8 | 97505579..97624000 | SDC2 | 2.991133 | 2.29E-94 | 629 | 629 | 9.674786 | 596 | 596 | 9.245689 | 748 | 748 | 9.905186 | 1325 | 1325 | 26.48126 | 1779 | 1779 | 27.10227 | 1780 | 1780 | 24.12203 |
| 12 | 13043716..13070871 | GPRC5A | 2.987696 | 4.55E-37 | 137 | 137 | 1.130512 | 192 | 192 | 1.597932 | 176 | 176 | 1.250368 | 308 | 308 | 3.302459 | 450 | 450 | 3.677953 | 505 | 505 | 3.671548 |
| 1 | 19592476..19600688 | AKR7L | 2.987131 | 0.033656 | 2 | 2 | 0.050322 | 5 | 5 | 0.126883 | 2 | 2 | 0.043324 | 6 | 6 | 0.196162 | 8 | 8 | 0.19937 | 9 | 9 | 0.199516 |
| 19 | 19627036..19648390 | YJEFN3 | 2.986576 | 3.71E-06 | 5 | 18 | 0.340383 | 15 | 38 | 0.724738 | 10 | 29 | 0.472132 | 20 | 52 | 1.277706 | 30 | 73 | 1.367279 | 25 | 90 | 1.499481 |
| 18 | 2655737..2805015 | SMCHD1 | 2.985595 | 1.65E-98 | 410 | 508 | 2.964908 | 454 | 560 | 3.296384 | 650 | 792 | 3.979633 | 990 | 1205 | 9.138325 | 1317 | 1607 | 9.289714 | 1417 | 1727 | 8.880613 |
| 2 | 3501132..3523507 | ADI1 | 2.981116 | 6.53E-85 | 931 | 971 | 12.16302 | 914 | 965 | 12.19135 | 1195 | 1239 | 13.36177 | 2010 | 2066 | 33.62674 | 2590 | 2673 | 33.16349 | 2905 | 2963 | 32.7007 |
| 3 | 194304740..194310989 | TMEM44-AS1 | 2.98088 | 3.8E-07 | 14 | 17 | 1.058074 | 9 | 12 | 0.75327 | 13 | 16 | 0.857348 | 19 | 22 | 1.779188 | 31 | 36 | 2.219262 | 40 | 46 | 2.522482 |
| 6 | 89790470..89794879 | PNRC1 | 2.972975 | 1.96E-72 | 999 | 999 | 23.25418 | 935 | 935 | 21.95076 | 1180 | 1180 | 23.64764 | 1995 | 1995 | 60.34072 | 2614 | 2614 | 60.26708 | 3100 | 3100 | 63.57705 |
| 5 | 172195093..172198198 | DUSP1 | 2.972841 | 1.01E-47 | 118 | 573 | 19.76585 | 124 | 573 | 19.93507 | 164 | 630 | 18.70991 | 276 | 1116 | 50.02154 | 328 | 1404 | 47.96969 | 396 | 1490 | 45.28456 |
| 13 | 107142079..107187462 | EFNB2 | 2.967254 | 2.93E-69 | 525 | 525 | 8.19642 | 464 | 464 | 7.306093 | 672 | 672 | 9.032428 | 1058 | 1058 | 21.46262 | 1382 | 1382 | 21.37037 | 1651 | 1651 | 22.70989 |
| 11 | 92085262..92629618 | FAT3 | 2.966709 | 1.74E-21 | 43 | 44 | 0.157798 | 52 | 56 | 0.202553 | 68 | 69 | 0.213043 | 93 | 95 | 0.442694 | 132 | 133 | 0.472431 | 179 | 179 | 0.565593 |
| 7 | 30323923..30452118 | ZNRF2 | 2.966051 | 1.1E-38 | 126 | 127 | 2.120101 | 103 | 103 | 1.734173 | 135 | 135 | 1.940247 | 227 | 229 | 4.9673 | 296 | 298 | 4.92729 | 378 | 381 | 5.603778 |
| 22 | 38201114..38203442 | H1F0 | 2.953987 | 7.06E-45 | 2167 | 2167 | 64.80172 | 1719 | 1719 | 51.84488 | 1956 | 1956 | 50.35781 | 3753 | 3753 | 145.8271 | 5251 | 5251 | 155.528 | 5449 | 5449 | 143.5647 |
| X | 129336685..129402873 | ZNF280C | 2.951753 | 2.24E-16 | 29 | 29 | 0.435852 | 53 | 53 | 0.803377 | 55 | 55 | 0.711663 | 88 | 88 | 1.718525 | 99 | 99 | 1.473721 | 150 | 150 | 1.986257 |
| 2 | 144695635..145090135 | GTDC1 | 2.949609 | 1.54E-25 | 47 | 86 | 0.422932 | 56 | 103 | 0.510872 | 86 | 138 | 0.584281 | 135 | 245 | 1.565564 | 154 | 275 | 1.339505 | 171 | 325 | 1.408183 |
| 17 | 48585745..48608862 | MYCBPAP | 2.946266 | 1.79E-05 | 10 | 10 | 0.106901 | 19 | 19 | 0.204851 | 3 | 3 | 0.027611 | 27 | 27 | 0.375041 | 23 | 23 | 0.243528 | 29 | 29 | 0.273139 |
| 17 | 30593195..30651680 | RHBDL3 | 2.942155 | 0.008562 | 3 | 3 | 0.038664 | 4 | 4 | 0.051993 | 5 | 5 | 0.055478 | 7 | 7 | 0.117223 | 7 | 7 | 0.089355 | 16 | 16 | 0.181679 |
| 17 | 39182278..39183454 | KRTAP1-5 | 2.937942 | 1.52E-06 | 5 | 5 | 0.295863 | 7 | 7 | 0.417754 | 22 | 22 | 1.120763 | 26 | 26 | 1.999061 | 27 | 28 | 1.641034 | 30 | 30 | 1.56403 |
| 17 | 40610862..40674629 | ATP6V0A1 | 2.937936 | 2.45E-69 | 492 | 549 | 4.66574 | 545 | 577 | 4.945683 | 615 | 654 | 4.785158 | 1106 | 1160 | 12.80968 | 1277 | 1341 | 11.28797 | 1648 | 1752 | 13.11854 |
| 12 | 123636867..123728561 | MPHOSPH9 | 2.937686 | 3.94E-48 | 117 | 117 | 0.790819 | 124 | 125 | 0.852126 | 168 | 169 | 0.983441 | 272 | 272 | 2.388869 | 339 | 339 | 2.269499 | 384 | 384 | 2.286787 |
| 10 | 47228366..47241942 | BMS1P2 | 2.935093 | 0.031057 | 4 | 21 | 0.679317 | 4 | 23 | 0.750383 | 2 | 15 | 0.417748 | 7 | 24 | 1.00878 | 13 | 31 | 0.993239 | 5 | 29 | 0.826522 |
| 12 | 32552463..32798984 | FGD4 | 2.929739 | 5.35E-49 | 125 | 125 | 0.819058 | 138 | 138 | 0.911982 | 177 | 177 | 0.998501 | 283 | 283 | 2.409479 | 358 | 358 | 2.323415 | 429 | 429 | 2.476653 |
| 10 | 75183339..75193319 | MSS51 | 2.928756 | 0.000114 | 7 | 7 | 0.201373 | 7 | 7 | 0.203097 | 8 | 8 | 0.198136 | 18 | 18 | 0.672832 | 20 | 20 | 0.569864 | 16 | 16 | 0.405532 |
| 7 | 143339348..143534026 | RP11-61L23.2 | 2.927741 | 0.001652 | 7 | 48 | 0.567575 | 5 | 38 | 0.453177 | 5 | 57 | 0.580266 | 9 | 65 | 0.998682 | 20 | 84 | 0.983785 | 13 | 91 | 0.948039 |
| 12 | 6976283..6980112 | TPI1 | 2.92632 | 9.99E-90 | 3643 | 4223 | 108.9317 | 3163 | 3628 | 94.385 | 3870 | 4425 | 98.2691 | 6950 | 7910 | 265.1196 | 9033 | 10372 | 264.9933 | 10014 | 11339 | 257.6981 |
| 2 | 24252210..24272445 | C2orf44 | 2.918606 | 5.16E-05 | 13 | 73 | 1.321593 | 3 | 76 | 1.387685 | 11 | 98 | 1.527465 | 16 | 123 | 2.893424 | 30 | 161 | 2.886954 | 20 | 176 | 2.807312 |
| 8 | 57124245..57131357 | CHCHD7 | 2.918481 | 4.41E-48 | 131 | 131 | 1.555344 | 144 | 144 | 1.724328 | 173 | 173 | 1.768363 | 293 | 293 | 4.52017 | 398 | 398 | 4.680337 | 392 | 392 | 4.10057 |
| 2 | 75145275..75165545 | AC104135.3 | 2.913418 | 4.53E-14 | 29 | 29 | 0.483654 | 35 | 35 | 0.588718 | 29 | 29 | 0.416394 | 53 | 53 | 1.148536 | 72 | 72 | 1.189346 | 102 | 102 | 1.498787 |
| 1 | 10696661..10856707 | CASZ1 | 2.91037 | 5.9E-05 | 12 | 16 | 0.098301 | 6 | 6 | 0.037178 | 7 | 7 | 0.037026 | 19 | 26 | 0.20756 | 20 | 25 | 0.15213 | 22 | 26 | 0.140739 |
| 2 | 70056774..70108528 | GMCL1 | 2.909319 | 2.88E-50 | 160 | 161 | 2.278145 | 168 | 168 | 2.397547 | 184 | 185 | 2.253708 | 311 | 313 | 5.754822 | 460 | 460 | 6.446921 | 470 | 471 | 5.871912 |
| 6 | 31371356..31383092 | MICA | 2.908958 | 1.49E-56 | 182 | 351 | 17.63766 | 198 | 316 | 16.01487 | 265 | 411 | 17.78059 | 422 | 608 | 39.69808 | 519 | 778 | 38.72153 | 612 | 980 | 43.38735 |
| 22 | 42760406..42765242 | Z83851.1 | 2.907791 | 0.007455 | 4 | 4 | 0.219877 | 2 | 2 | 0.11088 | 7 | 7 | 0.331275 | 8 | 8 | 0.571403 | 12 | 12 | 0.653342 | 12 | 12 | 0.581172 |
| 22 | 38731767..38794934 | RP3-449O17.1 | 2.905534 | 8.23E-05 | 12 | 16 | 0.289363 | 7 | 19 | 0.346561 | 6 | 16 | 0.249123 | 16 | 28 | 0.657982 | 22 | 32 | 0.573208 | 23 | 32 | 0.50989 |
| 17 | 36508111..36556019 | SOCS7 | 2.902739 | 6.11E-28 | 65 | 65 | 1.620258 | 53 | 53 | 1.332444 | 80 | 80 | 1.716845 | 121 | 121 | 3.919116 | 167 | 167 | 4.123122 | 190 | 190 | 4.172799 |
| 5 | 94982458..95020477 | RFESD | 2.896465 | 0.001408 | 3 | 6 | 0.082552 | 1 | 7 | 0.097135 | 12 | 22 | 0.260596 | 10 | 17 | 0.303918 | 15 | 28 | 0.381568 | 14 | 25 | 0.303053 |

| X | 134229058..134232664 | LINC00087 | 2.890572 | 0.002888 | 6 | 35 | 0.90416 | 2 | 30 | 0.781629 | 8 | 37 | 0.822904 | 8 | 80 | 2.68534 | 20 | 139 | 3.556567 | 11 | 139 | 3.163699 |
| --- | --- | --- | --- | --- | --- | --- | --- | --- | --- | --- | --- | --- | --- | --- | --- | --- | --- | --- | --- | --- | --- | --- |
| 17 | 46668619..46671323 | HOXB5 | 2.89038 | 8.47E-21 | 53 | 458 | 15.62858 | 50 | 419 | 14.42017 | 52 | 486 | 14.27778 | 88 | 754 | 33.43163 | 124 | 948 | 32.04066 | 163 | 1213 | 36.46851 |
| 19 | 12125547..12146556 | ZNF433 | 2.889912 | 0.002615 | 7 | 25 | 0.565493 | 4 | 28 | 0.638775 | 5 | 28 | 0.545275 | 13 | 45 | 1.322611 | 9 | 37 | 0.82895 | 17 | 54 | 1.076179 |
| 6 | 147830063..148058683 | SAMD5 | 2.889182 | 6.34E-25 | 81 | 81 | 0.892617 | 112 | 112 | 1.244802 | 125 | 125 | 1.185934 | 177 | 177 | 2.53446 | 253 | 253 | 2.761465 | 340 | 340 | 3.301126 |
| 3 | 119813742..119855630 | RP11-18H7.1 | 2.888494 | 0.026131 | 5 | 5 | 0.15872 | 2 | 2 | 0.064031 | 4 | 4 | 0.109318 | 8 | 8 | 0.329976 | 9 | 9 | 0.282971 | 10 | 10 | 0.279681 |
| 1 | 120906028..120915073 | HIST2H2BA | 2.887848 | 0.026391 | 6 | 10 | 0.926146 | 1 | 3 | 0.280222 | 4 | 7 | 0.558146 | 8 | 16 | 1.925446 | 8 | 18 | 1.651166 | 11 | 19 | 1.550372 |
| 22 | 24666866..24838324 | SPECC1L-ADORA | 2.885564 | 0.003801 | 5 | 28 | 0.314328 | 2 | 10 | 0.113221 | 9 | 30 | 0.289946 | 7 | 71 | 1.035657 | 14 | 48 | 0.53371 | 18 | 126 | 1.246232 |
| 10 | 102246399..102289628 | SEC31B | 2.875308 | 3.44E-18 | 39 | 48 | 0.399882 | 47 | 56 | 0.470523 | 39 | 42 | 0.301238 | 73 | 83 | 0.898465 | 111 | 116 | 0.957167 | 116 | 138 | 1.012915 |
| 4 | 3076408..3245676 | HTT | 2.874326 | 4.2E-78 | 1502 | 1502 | 5.773734 | 1630 | 1630 | 6.319414 | 2013 | 2013 | 6.661944 | 3293 | 3293 | 16.44791 | 4146 | 4146 | 15.78538 | 4807 | 4807 | 16.28036 |
| 17 | 4692254..4693685 | GLTPD2 | 2.871643 | 0.000134 | 9 | 9 | 0.612723 | 9 | 9 | 0.617968 | 6 | 6 | 0.351676 | 12 | 12 | 1.061536 | 21 | 21 | 1.416054 | 25 | 25 | 1.499563 |
| 6 | 149068464..149398126 | UST | 2.870357 | 2.52E-69 | 203 | 205 | 3.128964 | 199 | 201 | 3.094176 | 294 | 294 | 3.863352 | 435 | 435 | 8.627163 | 569 | 581 | 8.783382 | 650 | 654 | 8.794832 |
| 9 | 132649466..132805473 | FNBP1 | 2.865763 | 4.4E-114 | 726 | 726 | 7.562535 | 727 | 727 | 7.637786 | 824 | 824 | 7.389725 | 1447 | 1447 | 19.58535 | 1879 | 1879 | 19.38637 | 2101 | 2101 | 19.28235 |
| 16 | 730224..732870 | STUB1 | 2.859961 | 2.88E-73 | 1353 | 1681 | 50.5506 | 1174 | 1436 | 43.55273 | 1280 | 1565 | 40.51756 | 2376 | 2815 | 109.994 | 3242 | 3830 | 114.0765 | 3495 | 4230 | 112.0733 |
| 3 | 196366646..196462878 | PIGX | 2.858812 | 3.95E-24 | 61 | 61 | 0.955559 | 105 | 107 | 1.690495 | 124 | 124 | 1.672321 | 181 | 181 | 3.684159 | 238 | 239 | 3.708212 | 267 | 269 | 3.712642 |
| 7 | 37723446..37991543 | EPDR1 | 2.855605 | 1.72E-22 | 40 | 339 | 8.243731 | 55 | 356 | 8.73125 | 71 | 469 | 9.819001 | 115 | 631 | 19.93818 | 132 | 813 | 19.58185 | 145 | 982 | 21.03966 |
| 12 | 52416616..52453291 | NR4A1 | 2.854275 | 3.56E-27 | 303 | 344 | 3.286458 | 238 | 287 | 2.765374 | 241 | 303 | 2.492198 | 503 | 599 | 7.435813 | 692 | 861 | 8.147263 | 671 | 833 | 7.01161 |
| 5 | 126203406..126366500 | MARCH3 | 2.85039 | 7.12E-19 | 53 | 53 | 0.712733 | 31 | 31 | 0.420451 | 51 | 51 | 0.590462 | 85 | 85 | 1.485259 | 113 | 113 | 1.505111 | 122 | 122 | 1.445487 |
| 13 | 79980444..79998463 | RBM26-AS1 | 2.849607 | 0.022973 | 6 | 6 | 0.111523 | 3 | 3 | 0.056239 | 3 | 3 | 0.048007 | 9 | 9 | 0.217364 | 10 | 10 | 0.184099 | 10 | 11 | 0.18014 |
| 2 | 208576264..208626563 | CCNYL1 | 2.841461 | 1.81E-56 | 237 | 242 | 3.580703 | 265 | 287 | 4.282892 | 263 | 276 | 3.515866 | 473 | 508 | 9.766719 | 649 | 690 | 10.11209 | 689 | 736 | 9.594754 |
| 8 | 67342420..67383836 | ADHFE1 | 2.838084 | 3.44E-21 | 52 | 65 | 1.206235 | 41 | 57 | 1.066831 | 57 | 75 | 1.198258 | 96 | 111 | 2.676539 | 115 | 128 | 2.352705 | 143 | 168 | 2.746825 |
| 7 | 129074274..129128240 | STRIP2 | 2.837682 | 1.28E-23 | 49 | 49 | 0.58078 | 74 | 74 | 0.884605 | 96 | 96 | 0.979618 | 132 | 132 | 2.032925 | 169 | 169 | 1.983997 | 215 | 215 | 2.24521 |
| 2 | 53994929..54002333 | CHAC2 | 2.833897 | 0.001962 | 7 | 12 | 0.632668 | 6 | 11 | 0.58491 | 5 | 8 | 0.363124 | 11 | 25 | 1.712641 | 14 | 32 | 1.671026 | 18 | 32 | 1.48644 |
| 1 | 1227756..1244989 | ACAP3 | 2.832606 | 3.42E-60 | 1107 | 1107 | 8.752218 | 1000 | 1000 | 7.973938 | 1071 | 1071 | 7.290047 | 2040 | 2040 | 20.95718 | 2550 | 2550 | 19.9687 | 2923 | 2923 | 20.36116 |
| 1 | 10458649..10480201 | PGD | 2.825831 | 1.31E-52 | 2511 | 2565 | 56.33629 | 2429 | 2470 | 54.71421 | 2886 | 2953 | 55.83862 | 4822 | 4902 | 139.8963 | 6429 | 6541 | 142.2932 | 7158 | 7309 | 141.4367 |
| 1 | 247285277..247335318 | ZNF124 | 2.825661 | 4.74E-09 | 10 | 10 | 0.154187 | 15 | 15 | 0.23326 | 29 | 29 | 0.38496 | 32 | 32 | 0.641105 | 45 | 45 | 0.687224 | 50 | 50 | 0.679235 |
| 17 | 41476327..41478505 | ARL4D | 2.822777 | 8.22E-35 | 128 | 128 | 5.530216 | 142 | 142 | 6.187608 | 139 | 139 | 5.170318 | 226 | 226 | 12.6874 | 350 | 350 | 14.97749 | 392 | 392 | 14.9218 |
| 10 | 6392278..6394723 | DKFZP667F0711 | 2.822565 | 0.043926 | 4 | 4 | 0.113894 | 0 | 0 | 0 | 6 | 6 | 0.147083 | 8 | 8 | 0.29598 | 7 | 7 | 0.197414 | 9 | 9 | 0.22578 |
| 3 | 96335981..96337000 | MTRNR2L12 | 2.818719 | 0.011605 | 2 | 3237 | 221.0241 | 5 | 2835 | 195.2326 | 6 | 3587 | 210.8622 | 7 | 4178 | 370.6786 | 16 | 5355 | 362.1558 | 8 | 6134 | 369.0149 |
| 1 | 89990395..90063423 | LRRC8B | 2.818507 | 0.005358 | 9 | 18 | 0.155268 | 6 | 14 | 0.121798 | 1 | 14 | 0.10397 | 15 | 35 | 0.392291 | 11 | 28 | 0.239224 | 12 | 32 | 0.243199 |
| 19 | 58469805..58485902 | C19orf18 | 2.816513 | 0.043696 | 2 | 2 | 0.152232 | 5 | 5 | 0.383838 | 3 | 3 | 0.196593 | 7 | 7 | 0.692319 | 6 | 6 | 0.452341 | 11 | 11 | 0.737687 |
| X | 131351175..131566890 | RAP2C-AS1 | 2.816433 | 0.043234 | 3 | 20 | 0.393926 | 4 | 26 | 0.516488 | 3 | 37 | 0.627418 | 6 | 44 | 1.126081 | 9 | 58 | 1.131493 | 9 | 57 | 0.989152 |
| 22 | 19163095..19166343 | SLC25A1 | 2.813895 | 1.66E-86 | 2021 | 2021 | 67.37907 | 1875 | 1875 | 63.04669 | 2088 | 2088 | 59.9321 | 3704 | 3704 | 160.4581 | 4943 | 4943 | 163.2256 | 5406 | 5406 | 158.7954 |
| 17 | 40009797..40021684 | KLHL11 | 2.810832 | 3.71E-21 | 41 | 41 | 1.198276 | 58 | 58 | 1.709635 | 55 | 55 | 1.383904 | 96 | 96 | 3.645662 | 126 | 126 | 3.647394 | 138 | 138 | 3.553492 |
| X | 91034260..91878229 | PCDH11X | 2.810617 | 0.011184 | 5 | 10 | 0.059762 | 3 | 3 | 0.018082 | 5 | 7 | 0.036016 | 6 | 11 | 0.085418 | 9 | 11 | 0.065111 | 16 | 24 | 0.126368 |
| 6 | 31795512..31798031 | HSPA1B | 2.808666 | 1.79E-92 | 509 | 2107 | 58.23192 | 522 | 1957 | 54.54937 | 568 | 2051 | 48.80143 | 997 | 3620 | 129.9982 | 1320 | 4974 | 136.1574 | 1418 | 5572 | 135.6784 |
| 7 | 128470431..128499328 | FLNC | 2.80815 | 8.63E-63 | 11361 | 13982 | 104.9345 | 9729 | 12141 | 91.89797 | 11239 | 13784 | 89.06247 | 20215 | 24532 | 239.2292 | 25986 | 31612 | 234.985 | 29613 | 36071 | 238.5121 |
| 5 | 128430444..128449721 | ISOC1 | 2.807115 | 3.28E-47 | 145 | 145 | 5.205511 | 168 | 168 | 6.082849 | 199 | 199 | 6.150619 | 338 | 338 | 15.76682 | 394 | 394 | 14.00976 | 457 | 457 | 14.45489 |
| 7 | 100136834..100165842 | AGFG2 | 2.806113 | 7.75E-29 | 108 | 108 | 1.37309 | 103 | 103 | 1.320732 | 93 | 93 | 1.017955 | 204 | 204 | 3.370058 | 229 | 229 | 2.883697 | 277 | 277 | 3.10283 |
| 9 | 127279554..127533589 | NR6A1 | 2.80057 | 8.15E-05 | 10 | 10 | 0.097763 | 4 | 4 | 0.03944 | 12 | 13 | 0.109418 | 16 | 16 | 0.203248 | 22 | 25 | 0.242076 | 23 | 23 | 0.198109 |
| 6 | 79943435..79946514 | HMGN3-AS1 | 2.798087 | 9.33E-06 | 7 | 14 | 0.330973 | 14 | 18 | 0.42918 | 12 | 19 | 0.386713 | 24 | 32 | 0.982984 | 31 | 44 | 1.030282 | 22 | 27 | 0.562382 |
| 1 | 90098631..90235462 | LRRC8C | 2.798043 | 1.18E-07 | 9 | 94 | 0.558405 | 15 | 161 | 0.964605 | 21 | 226 | 1.155846 | 28 | 264 | 2.03778 | 35 | 367 | 2.159367 | 42 | 412 | 2.156362 |
| 17 | 3827169..3867736 | ATP2A3 | 2.796859 | 2.35E-59 | 743 | 743 | 7.536716 | 634 | 634 | 6.486119 | 777 | 777 | 6.785544 | 1251 | 1251 | 16.48856 | 1833 | 1833 | 18.41598 | 1954 | 1954 | 17.46309 |
| 14 | 64319683..64693165 | SYNE2 | 2.796064 | 1.73E-97 | 444 | 522 | 1.157627 | 465 | 531 | 1.187668 | 534 | 596 | 1.137928 | 893 | 977 | 2.815302 | 1185 | 1323 | 2.90601 | 1272 | 1433 | 2.799933 |
| 12 | 57914493..57923931 | MBD6 | 2.794979 | 1.63E-38 | 546 | 546 | 6.735175 | 533 | 533 | 6.631103 | 521 | 521 | 5.533046 | 902 | 902 | 14.45756 | 1283 | 1283 | 15.67552 | 1595 | 1595 | 17.33485 |
| 22 | 50883429..50913454 | SBF1 | 2.789225 | 2E-101 | 3078 | 3078 | 22.70397 | 2906 | 2907 | 21.62621 | 3292 | 3293 | 20.91198 | 5691 | 5692 | 54.55444 | 7631 | 7631 | 55.75112 | 8245 | 8245 | 53.58299 |
| 12 | 1797740..1897844 | ADIPOR2 | 2.783431 | 2.07E-97 | 677 | 677 | 8.021512 | 725 | 725 | 8.663789 | 923 | 923 | 9.415417 | 1406 | 1406 | 21.64636 | 1877 | 1877 | 22.02778 | 2081 | 2081 | 21.72415 |
| 6 | 41040684..41067715 | NFYA | 2.778595 | 1.77E-59 | 226 | 246 | 4.495658 | 204 | 217 | 3.999634 | 270 | 289 | 4.547015 | 433 | 456 | 10.82817 | 550 | 592 | 10.71566 | 631 | 676 | 10.88449 |
| 1 | 225997794..226033260 | EPHX1 | 2.778195 | 5.2E-107 | 816 | 904 | 25.14382 | 866 | 953 | 26.73364 | 1090 | 1224 | 29.30991 | 1676 | 1839 | 66.46249 | 2227 | 2460 | 67.76991 | 2483 | 2784 | 68.22368 |
| 11 | 18415935..18429972 | LDHA | 2.770197 | 8.65E-62 | 1783 | 1871 | 20.98357 | 2049 | 2136 | 24.16068 | 2865 | 2975 | 28.72518 | 4207 | 4416 | 64.35268 | 5338 | 5555 | 61.70617 | 5651 | 5847 | 57.77524 |

| 16 | 29938157..29940254 | CTD-2574D22.2 | 2.770165 | 0.000348 | 10 | 10 | 0.395268 | 6 | 6 | 0.239191 | 9 | 9 | 0.30627 | 20 | 20 | 1.027196 | 10 | 11 | 0.430648 | 28 | 29 | 1.009932 |
| --- | --- | --- | --- | --- | --- | --- | --- | --- | --- | --- | --- | --- | --- | --- | --- | --- | --- | --- | --- | --- | --- | --- |
| 1 | 167498914..167523004 | CREG1 | 2.769836 | 1.03E-61 | 523 | 523 | 13.55094 | 643 | 643 | 16.80278 | 807 | 807 | 18.00163 | 1226 | 1226 | 41.27532 | 1654 | 1654 | 42.44655 | 1616 | 1616 | 36.89031 |
| 2 | 120770581..120936695 | EPB41L5 | 2.769623 | 4.83E-39 | 113 | 244 | 1.831016 | 151 | 304 | 2.300797 | 179 | 383 | 2.474409 | 265 | 580 | 5.655388 | 355 | 805 | 5.983251 | 398 | 830 | 5.487614 |
| 9 | 74477368..74525847 | ABHD17B | 2.769144 | 3.09E-28 | 68 | 68 | 1.60052 | 94 | 94 | 2.231425 | 103 | 103 | 2.087179 | 149 | 149 | 4.55691 | 223 | 223 | 5.198715 | 239 | 239 | 4.95625 |
| 14 | 90862846..90874605 | CALM1 | 2.769099 | 2.31E-68 | 2046 | 2555 | 23.09486 | 2121 | 2659 | 24.2407 | 2742 | 3369 | 26.21777 | 4172 | 5076 | 59.6181 | 5733 | 6978 | 62.4733 | 5918 | 7302 | 58.15264 |
| 4 | 186422851..186456766 | PDLIM3 | 2.765001 | 2.67E-39 | 128 | 128 | 1.103305 | 123 | 123 | 1.069284 | 168 | 168 | 1.24671 | 277 | 277 | 3.102399 | 335 | 335 | 2.860023 | 344 | 344 | 2.612446 |
| 14 | 74523553..74551196 | ALDH6A1 | 2.76406 | 1.05E-35 | 109 | 222 | 2.314588 | 95 | 196 | 2.061005 | 148 | 292 | 2.621041 | 218 | 386 | 5.229258 | 289 | 526 | 5.43182 | 298 | 545 | 5.006339 |
| 3 | 148415571..148460795 | AGTR1 | 2.762673 | 1.75E-08 | 15 | 15 | 0.300372 | 9 | 9 | 0.181766 | 30 | 30 | 0.517201 | 32 | 32 | 0.832625 | 46 | 46 | 0.912356 | 46 | 46 | 0.811575 |
| 3 | 44540462..44552128 | ZNF852 | 2.760225 | 6.68E-09 | 21 | 22 | 0.77738 | 19 | 19 | 0.677121 | 18 | 18 | 0.547587 | 43 | 43 | 1.97429 | 49 | 49 | 1.714927 | 41 | 44 | 1.369829 |
| 7 | 44646171..44748665 | OGDH | 2.759082 | 7.66E-80 | 1611 | 1611 | 21.53963 | 1502 | 1502 | 20.2542 | 1848 | 1848 | 21.27233 | 3023 | 3023 | 52.51858 | 3909 | 3909 | 51.76634 | 4446 | 4446 | 52.37395 |
| 13 | 25670300..25673389 | PABPC3 | 2.756548 | 0.004036 | 3 | 6 | 0.135235 | 5 | 6 | 0.136393 | 8 | 9 | 0.174643 | 15 | 16 | 0.468587 | 13 | 14 | 0.31254 | 9 | 9 | 0.178725 |
| 11 | 61567099..61596790 | FADS1 | 2.753141 | 6E-101 | 1576 | 5572 | 37.94176 | 1659 | 5704 | 39.17313 | 2149 | 6864 | 40.23963 | 3223 | 10123 | 89.56693 | 4209 | 13176 | 88.86464 | 4851 | 13949 | 83.68596 |
| 6 | 80624529..80657297 | ELOVL4 | 2.752699 | 6.02E-29 | 68 | 68 | 1.55685 | 90 | 90 | 2.078178 | 121 | 121 | 2.385029 | 173 | 173 | 5.146549 | 225 | 225 | 5.102223 | 237 | 237 | 4.780677 |
| 17 | 59477257..59486827 | TBX2 | 2.741632 | 1.81E-76 | 1803 | 6992 | 80.77059 | 1716 | 6178 | 71.97838 | 2122 | 6642 | 66.05734 | 3461 | 11029 | 165.5465 | 4289 | 14488 | 165.7675 | 5092 | 16641 | 169.3692 |
| 2 | 72403113..73053170 | EXOC6B | 2.738152 | 3.68E-55 | 749 | 749 | 5.121745 | 812 | 812 | 5.600083 | 1146 | 1146 | 6.746695 | 1621 | 1621 | 14.40294 | 2084 | 2084 | 14.11474 | 2410 | 2410 | 14.51965 |
| X | 24483338..24557954 | PDK3 | 2.731015 | 3.17E-10 | 31 | 31 | 0.801125 | 17 | 17 | 0.443088 | 28 | 28 | 0.622969 | 57 | 57 | 1.914015 | 51 | 51 | 1.305412 | 64 | 64 | 1.457208 |
| 4 | 185676749..185747972 | ACSL1 | 2.72522 | 5.2E-94 | 544 | 544 | 6.17664 | 507 | 507 | 5.805821 | 665 | 665 | 6.500479 | 1035 | 1035 | 15.26953 | 1351 | 1351 | 15.19315 | 1491 | 1491 | 14.91537 |
| 11 | 10324204..10325251 | RP11-351I24.1 | 2.723527 | 0.028585 | 6 | 6 | 0.520395 | 4 | 4 | 0.3499 | 3 | 3 | 0.224013 | 7 | 7 | 0.788881 | 12 | 12 | 1.030865 | 11 | 11 | 0.840577 |
| 12 | 105501102..105562912 | KIAA1033 | 2.722125 | 4.72E-29 | 578 | 578 | 5.231381 | 757 | 760 | 6.937523 | 1065 | 1065 | 8.298669 | 1438 | 1438 | 16.9114 | 1892 | 1892 | 16.96089 | 2024 | 2024 | 16.13995 |
| 9 | 130374544..130457460 | STXBP1 | 2.72061 | 4.28E-71 | 1018 | 1018 | 14.61851 | 1040 | 1041 | 15.07677 | 1219 | 1220 | 15.08292 | 1952 | 1952 | 36.42229 | 2493 | 2493 | 35.4582 | 2976 | 2976 | 37.65229 |
| 6 | 30710976..30712331 | IER3 | 2.720291 | 1.72E-40 | 505 | 553 | 28.40289 | 440 | 503 | 26.056 | 451 | 498 | 22.021 | 836 | 935 | 62.3995 | 1077 | 1212 | 61.65653 | 1271 | 1386 | 62.71967 |
| 1 | 9648932..9674935 | TMEM201 | 2.716048 | 3.91E-39 | 171 | 171 | 1.696992 | 149 | 149 | 1.491325 | 186 | 186 | 1.589158 | 284 | 284 | 3.662133 | 386 | 386 | 3.794111 | 478 | 478 | 4.179408 |
| 10 | 119000604..119038941 | SLC18A2 | 2.71602 | 1.56E-07 | 19 | 19 | 0.320794 | 15 | 15 | 0.255427 | 29 | 29 | 0.421543 | 27 | 27 | 0.592337 | 66 | 66 | 1.103713 | 50 | 50 | 0.743783 |
| 16 | 284545..319942 | ITFG3_1 | 2.714684 | 9.25E-90 | 1158 | 2144 | 28.94386 | 1047 | 1896 | 25.81501 | 1288 | 2269 | 26.3716 | 2021 | 3619 | 63.48224 | 2799 | 4951 | 66.20084 | 3087 | 5520 | 65.65591 |
| 7 | 155089486..155101945 | INSIG1 | 2.712418 | 2.68E-92 | 3540 | 3540 | 67.54723 | 4011 | 4011 | 77.18968 | 4944 | 4944 | 81.21814 | 7443 | 7443 | 184.5374 | 9853 | 9853 | 186.2137 | 10738 | 10738 | 180.5223 |
| 22 | 19770747..19842462 | GNB1L | 2.711865 | 3.81E-21 | 91 | 107 | 1.066419 | 70 | 87 | 0.874512 | 71 | 78 | 0.669282 | 136 | 144 | 1.864828 | 201 | 205 | 2.023658 | 188 | 190 | 1.668403 |
| 16 | 84853590..84954374 | CRISPLD2 | 2.711056 | 1.56E-65 | 354 | 354 | 3.096162 | 317 | 318 | 2.80511 | 423 | 423 | 3.185159 | 641 | 641 | 7.28468 | 836 | 836 | 7.242119 | 989 | 989 | 7.621138 |
| 16 | 1756184..1820318 | MAPK8IP3 | 2.710463 | 2.4E-36 | 1422 | 1422 | 9.629249 | 1150 | 1150 | 7.854038 | 1243 | 1243 | 7.2466 | 2241 | 2241 | 19.71818 | 3012 | 3012 | 20.20165 | 3437 | 3437 | 20.50574 |
| 11 | 65482367..65488418 | RNASEH2C | 2.709926 | 5.54E-61 | 314 | 401 | 7.554262 | 264 | 356 | 6.763944 | 300 | 388 | 6.292884 | 530 | 631 | 15.44575 | 699 | 812 | 15.15105 | 753 | 904 | 15.00442 |
| 3 | 101367733..101396339 | ZBTB11 | 2.70822 | 1.52E-37 | 197 | 288 | 2.704705 | 258 | 342 | 3.239335 | 288 | 392 | 3.169449 | 485 | 591 | 7.211854 | 536 | 678 | 6.306612 | 638 | 798 | 6.60288 |
| 6 | 80816364..81055987 | BCKDHB | 2.707853 | 6.4E-31 | 83 | 83 | 1.409222 | 94 | 94 | 1.609651 | 110 | 110 | 1.60792 | 159 | 159 | 3.507766 | 234 | 234 | 3.935105 | 254 | 254 | 3.799604 |
| 18 | 11851395..11854448 | CHMP1B | 2.707517 | 0.013997 | 4 | 669 | 15.25648 | 3 | 633 | 14.55909 | 7 | 785 | 15.41232 | 10 | 779 | 23.08329 | 9 | 1128 | 25.47864 | 13 | 1210 | 24.31177 |
| 5 | 141000443..141016437 | HDAC3 | 2.707096 | 3.05E-52 | 244 | 324 | 4.872674 | 265 | 352 | 5.339091 | 303 | 414 | 5.360348 | 455 | 605 | 11.82251 | 626 | 825 | 12.28896 | 754 | 952 | 12.61428 |
| 12 | 51454990..51477447 | CSRNP2 | 2.704382 | 1.66E-57 | 312 | 312 | 4.156389 | 272 | 272 | 3.65454 | 377 | 377 | 4.323876 | 586 | 586 | 10.14358 | 765 | 765 | 10.09397 | 799 | 799 | 9.378026 |
| X | 68835911..69259319 | EDA | 2.703232 | 4.49E-10 | 31 | 31 | 0.337296 | 18 | 18 | 0.197526 | 23 | 23 | 0.21545 | 48 | 48 | 0.678614 | 54 | 54 | 0.581945 | 60 | 60 | 0.57518 |
| 20 | 25604681..25658710 | ZNF337-AS1 | 2.701464 | 0.001092 | 3 | 23 | 0.301782 | 8 | 16 | 0.211733 | 11 | 41 | 0.463149 | 9 | 44 | 0.750155 | 17 | 45 | 0.584814 | 24 | 79 | 0.913264 |
| 10 | 4934796..5025475 | AKR1C1 | 2.700357 | 1.79E-81 | 707 | 970 | 7.169348 | 769 | 988 | 7.364906 | 894 | 1176 | 7.48317 | 1369 | 1782 | 17.11385 | 1971 | 2620 | 19.17998 | 1977 | 2717 | 17.69297 |
| 2 | 109403213..109501933 | CCDC138 | 2.69672 | 0.000601 | 9 | 9 | 0.208521 | 6 | 6 | 0.140204 | 8 | 8 | 0.159576 | 16 | 16 | 0.481682 | 18 | 18 | 0.413066 | 18 | 18 | 0.367438 |
| 4 | 74902306..74904524 | CXCL3 | 2.689136 | 0.008858 | 8 | 8 | 0.25109 | 3 | 3 | 0.094965 | 4 | 4 | 0.108086 | 12 | 12 | 0.489388 | 12 | 12 | 0.373044 | 10 | 10 | 0.27653 |
| 3 | 57611184..57678816 | DENND6A | 2.682309 | 3.1E-22 | 106 | 107 | 1.45436 | 132 | 133 | 1.823232 | 203 | 205 | 2.3989 | 249 | 252 | 4.450621 | 319 | 322 | 4.334938 | 410 | 413 | 4.945853 |
| 12 | 121148238..121161443 | UNC119B | 2.680332 | 9.05E-73 | 370 | 529 | 8.079565 | 391 | 612 | 9.427272 | 425 | 661 | 8.691687 | 705 | 1128 | 22.38584 | 889 | 1477 | 22.34353 | 1052 | 1646 | 22.14957 |
| 6 | 46655612..46672056 | TDRD6 | 2.678496 | 6.95E-05 | 13 | 13 | 0.100144 | 6 | 6 | 0.046616 | 11 | 11 | 0.072953 | 23 | 23 | 0.230219 | 25 | 25 | 0.190748 | 19 | 19 | 0.128955 |
| 15 | 42120293..42140353 | JMJD7-PLA2G4B | 2.67491 | 1.45E-05 | 27 | 107 | 0.947868 | 9 | 59 | 0.527131 | 15 | 76 | 0.579626 | 37 | 150 | 1.726583 | 44 | 166 | 1.456502 | 32 | 156 | 1.217564 |
| 19 | 1554668..1568057 | MEX3D | 2.672176 | 1.42E-52 | 817 | 817 | 19.96523 | 730 | 730 | 17.99192 | 825 | 825 | 17.35708 | 1322 | 1322 | 41.97742 | 1961 | 1961 | 47.46449 | 2024 | 2024 | 43.57786 |
| 19 | 59055458..59062089 | TRIM28 | 2.671441 | 9.74E-77 | 3260 | 3260 | 56.28321 | 3114 | 3115 | 54.24024 | 3384 | 3384 | 50.2993 | 5682 | 5683 | 127.4885 | 7770 | 7770 | 132.8683 | 8327 | 8330 | 126.7096 |
| 3 | 98216756..98241910 | CLDND1 | 2.671249 | 8.39E-21 | 144 | 163 | 2.176025 | 206 | 230 | 3.096752 | 294 | 329 | 3.781312 | 375 | 408 | 7.077315 | 502 | 557 | 7.364961 | 535 | 603 | 7.092457 |
| 1 | 6650784..6674667 | KLHL21 | 2.670011 | 3.37E-14 | 2039 | 2039 | 21.29063 | 2028 | 2028 | 21.35706 | 2351 | 2351 | 21.13461 | 3816 | 3819 | 51.8147 | 4951 | 4951 | 51.20392 | 5473 | 5473 | 50.35005 |
| 10 | 126307861..126432838 | FAM53B | 2.664092 | 2.38E-13 | 38 | 401 | 4.347464 | 28 | 446 | 4.876731 | 45 | 455 | 4.246913 | 59 | 648 | 9.128484 | 101 | 882 | 9.471073 | 86 | 966 | 9.227241 |
| 16 | 103010..107669 | SNRNP25 | 2.663926 | 4.38E-30 | 224 | 227 | 5.166561 | 201 | 201 | 4.613963 | 206 | 208 | 4.075767 | 330 | 331 | 9.788942 | 523 | 523 | 11.79007 | 562 | 564 | 11.30988 |

| 20 | 25228705..25278650 | PYGB | 2.662742 | 4.18E-75 | 1698 | 2481 | 38.62139 | 1483 | 2224 | 34.91711 | 1810 | 2705 | 36.25257 | 3008 | 4305 | 87.07758 | 3835 | 5600 | 86.34321 | 4193 | 6084 | 83.44368 |
| --- | --- | --- | --- | --- | --- | --- | --- | --- | --- | --- | --- | --- | --- | --- | --- | --- | --- | --- | --- | --- | --- | --- |
| 11 | 62559595..62573774 | NXF1 | 2.657747 | 3.15E-92 | 651 | 651 | 7.31993 | 630 | 630 | 7.14445 | 816 | 816 | 7.89926 | 1197 | 1197 | 17.48848 | 1598 | 1598 | 17.79679 | 1837 | 1837 | 18.19861 |
| 6 | 72054047..72130472 | LINC00472 | 2.653785 | 1.41E-07 | 18 | 26 | 0.525937 | 10 | 18 | 0.367227 | 24 | 36 | 0.62695 | 30 | 57 | 1.49819 | 39 | 65 | 1.302304 | 46 | 82 | 1.461427 |
| 2 | 111876955..111926024 | BCL2L11 | 2.653775 | 5.88E-17 | 135 | 135 | 1.411746 | 200 | 200 | 2.109382 | 231 | 231 | 2.079722 | 263 | 263 | 3.573639 | 464 | 464 | 4.805957 | 536 | 536 | 4.938452 |
| 17 | 78109013..78120982 | EIF4A3 | 2.6526 | 4.3E-104 | 713 | 713 | 9.997525 | 726 | 726 | 10.26696 | 857 | 857 | 10.34556 | 1340 | 1340 | 24.41405 | 1808 | 1810 | 25.13741 | 1908 | 1908 | 23.57135 |
| 10 | 135075907..135090372 | ADAM8 | 2.648823 | 0.002794 | 25 | 25 | 0.364258 | 9 | 9 | 0.132256 | 8 | 8 | 0.100353 | 34 | 34 | 0.643695 | 21 | 21 | 0.303059 | 38 | 38 | 0.487816 |
| 17 | 21428051..21477722 | C17orf51 | 2.648346 | 2.61E-30 | 109 | 259 | 2.059173 | 83 | 223 | 1.788135 | 126 | 315 | 2.156125 | 193 | 475 | 4.90703 | 236 | 621 | 4.890166 | 269 | 633 | 4.434043 |
| 21 | 44834395..44847008 | SIK1 | 2.648087 | 1.08E-13 | 45 | 45 | 0.64144 | 24 | 24 | 0.34503 | 49 | 49 | 0.601326 | 72 | 72 | 1.333547 | 96 | 96 | 1.355358 | 91 | 91 | 1.142847 |
| 5 | 179727690..179780387 | GFPT2 | 2.647003 | 6.36E-63 | 347 | 347 | 5.055903 | 361 | 361 | 5.304919 | 433 | 433 | 5.431596 | 632 | 632 | 11.96516 | 926 | 926 | 13.36347 | 955 | 955 | 12.25958 |
| 4 | 148999913..149365850 | NR3C2 | 2.645211 | 2.68E-30 | 100 | 101 | 1.064668 | 90 | 95 | 1.009994 | 135 | 140 | 1.270548 | 175 | 182 | 2.492851 | 254 | 263 | 2.745918 | 286 | 297 | 2.758369 |
| 8 | 140742586..141468678 | TRAPPC9 | 2.644424 | 1.44E-73 | 432 | 432 | 0.859927 | 389 | 389 | 0.780962 | 505 | 505 | 0.865445 | 794 | 794 | 2.05367 | 1017 | 1017 | 2.005109 | 1093 | 1093 | 1.916908 |
| 5 | 32227100..32313115 | MTMR12 | 2.638925 | 9.91E-63 | 284 | 284 | 3.567089 | 305 | 305 | 3.86365 | 382 | 382 | 4.130753 | 587 | 587 | 9.580005 | 729 | 729 | 9.069056 | 803 | 803 | 8.886162 |
| 11 | 125763381..125773116 | PUS3 | 2.636313 | 6.63E-06 | 10 | 91 | 3.154704 | 15 | 89 | 3.111785 | 16 | 117 | 3.491993 | 26 | 78 | 3.513532 | 38 | 124 | 4.257728 | 26 | 123 | 3.756864 |
| 10 | 74766975..74856732 | P4HA1 | 2.636048 | 1.05E-53 | 503 | 504 | 11.01747 | 595 | 598 | 13.18423 | 740 | 742 | 13.96451 | 1121 | 1128 | 32.04 | 1396 | 1398 | 30.26896 | 1470 | 1473 | 28.36986 |
| 1 | 10270863..10441661 | KIF1B | 2.634129 | 7.75E-72 | 946 | 966 | 3.802531 | 1051 | 1059 | 4.204302 | 1366 | 1375 | 4.659815 | 1969 | 1980 | 10.12728 | 2510 | 2537 | 9.89134 | 2837 | 2871 | 9.957079 |
| 15 | 51739908..51915030 | DMXL2 | 2.632346 | 1.32E-30 | 206 | 284 | 1.432571 | 244 | 348 | 1.770432 | 362 | 482 | 2.093221 | 474 | 650 | 4.26033 | 592 | 814 | 4.066879 | 693 | 921 | 4.093177 |
| 18 | 33564350..33647539 | RPRD1A | 2.63212 | 7.06E-73 | 311 | 311 | 2.800977 | 339 | 339 | 3.079294 | 411 | 411 | 3.186847 | 622 | 622 | 7.278997 | 815 | 815 | 7.270189 | 877 | 877 | 6.95908 |
| 7 | 128784712..128808671 | TSPAN33 | 2.625941 | 0.007201 | 6 | 10 | 0.279031 | 10 | 12 | 0.337704 | 5 | 7 | 0.168159 | 4 | 6 | 0.217538 | 19 | 26 | 0.718563 | 24 | 34 | 0.835862 |
| 5 | 92919043..92930321 | NR2F1 | 2.622704 | 9.04E-55 | 1518 | 2927 | 48.52518 | 1408 | 2766 | 46.24864 | 1503 | 2842 | 40.56382 | 2468 | 4520 | 97.36771 | 3434 | 6562 | 107.7506 | 3843 | 7217 | 105.4155 |
| 2 | 62423248..62451866 | B3GNT2 | 2.620067 | 8E-31 | 132 | 132 | 3.213314 | 124 | 124 | 3.044411 | 139 | 139 | 2.91316 | 208 | 208 | 6.579224 | 330 | 330 | 7.956686 | 326 | 326 | 6.991977 |
| 7 | 90893783..90898123 | FZD1 | 2.619173 | 3.68E-76 | 879 | 879 | 14.1025 | 803 | 803 | 12.99347 | 988 | 988 | 13.64692 | 1523 | 1523 | 31.74968 | 2126 | 2126 | 33.78389 | 2162 | 2162 | 30.5609 |
| 2 | 238969530..239008054 | SCLY | 2.614588 | 6.73E-15 | 33 | 91 | 0.540169 | 53 | 138 | 0.82617 | 47 | 131 | 0.669468 | 77 | 195 | 1.504024 | 110 | 311 | 1.828468 | 102 | 332 | 1.736318 |
| 5 | 72112139..72212560 | TNPO1 | 2.609677 | 4.73E-35 | 1370 | 1385 | 8.053763 | 1699 | 1719 | 10.08155 | 2334 | 2357 | 11.79992 | 3089 | 3117 | 23.55147 | 3985 | 4031 | 23.21672 | 4518 | 4560 | 23.36238 |
| 12 | 57482677..57489259 | NAB2 | 2.608637 | 4.82E-49 | 1514 | 1514 | 35.03132 | 1367 | 1367 | 31.90079 | 1457 | 1457 | 29.02422 | 2596 | 2596 | 78.04901 | 3338 | 3338 | 76.49904 | 3489 | 3489 | 71.12704 |
| 11 | 94898704..94965705 | SESN3 | 2.60756 | 1.3E-18 | 78 | 420 | 2.82077 | 135 | 533 | 3.610338 | 141 | 676 | 3.908728 | 208 | 1071 | 9.346304 | 244 | 1333 | 8.867221 | 313 | 1515 | 8.964666 |
| 14 | 52781023..52795324 | PTGER2 | 2.607531 | 7.82E-49 | 197 | 197 | 5.548036 | 197 | 197 | 5.595534 | 245 | 245 | 5.940314 | 357 | 357 | 13.06391 | 471 | 471 | 13.13811 | 558 | 558 | 13.84555 |
| 17 | 46652875..46657473 | HOXB4 | 2.607247 | 8.09E-17 | 45 | 373 | 6.914563 | 48 | 365 | 6.82419 | 48 | 408 | 6.511581 | 80 | 600 | 14.45238 | 109 | 877 | 16.10254 | 117 | 1074 | 17.54136 |
| 4 | 30722037..31148422 | PCDH7 | 2.606158 | 6.55E-66 | 805 | 805 | 5.459651 | 708 | 708 | 4.842889 | 843 | 843 | 4.922286 | 1332 | 1332 | 11.7383 | 1765 | 1765 | 11.8564 | 2027 | 2027 | 12.11228 |
| 17 | 77906142..78009647 | TBC1D16 | 2.598822 | 1.35E-92 | 2018 | 2023 | 12.19335 | 1897 | 1905 | 11.58042 | 2164 | 2172 | 11.27087 | 3467 | 3481 | 27.26235 | 4639 | 4662 | 27.83162 | 5063 | 5083 | 26.99295 |
| 7 | 27169596..27195542 | HOXA-AS3 | 2.598021 | 0.002388 | 4 | 37 | 0.432222 | 10 | 42 | 0.494831 | 8 | 44 | 0.442515 | 10 | 42 | 0.637509 | 24 | 58 | 0.671077 | 14 | 43 | 0.442565 |
| 16 | 28996147..29002104 | LAT | 2.59801 | 0.001257 | 4 | 13 | 0.204379 | 8 | 20 | 0.317122 | 11 | 27 | 0.36545 | 16 | 31 | 0.633267 | 18 | 36 | 0.560577 | 16 | 37 | 0.512505 |
| 3 | 123209667..123304032 | PTPLB | 2.596788 | 1.27E-23 | 270 | 270 | 3.514196 | 310 | 312 | 4.095615 | 496 | 497 | 5.56915 | 581 | 581 | 9.825856 | 845 | 849 | 10.94483 | 871 | 872 | 9.999581 |
| 11 | 616565..626078 | CDHR5 | 2.591375 | 0.01612 | 11 | 11 | 0.197807 | 4 | 4 | 0.072546 | 2 | 2 | 0.030963 | 16 | 16 | 0.373854 | 8 | 8 | 0.142488 | 13 | 13 | 0.205966 |
| 7 | 99933737..99965356 | PILRB | 2.591349 | 2.14E-08 | 23 | 84 | 0.892355 | 30 | 118 | 1.264278 | 28 | 130 | 1.188973 | 31 | 171 | 2.360404 | 66 | 267 | 2.809367 | 80 | 288 | 2.69559 |
| 4 | 102268937..102270040 | AP001816.1 | 2.58779 | 2.35E-21 | 86 | 94 | 8.287011 | 79 | 91 | 8.091215 | 76 | 86 | 6.527379 | 144 | 154 | 17.64098 | 161 | 177 | 15.45547 | 215 | 232 | 18.02026 |
| 12 | 110969120..111021125 | PPTC7 | 2.585394 | 1.46E-33 | 146 | 146 | 1.334953 | 174 | 174 | 1.604592 | 241 | 241 | 1.897145 | 319 | 319 | 3.789971 | 436 | 436 | 3.948559 | 442 | 442 | 3.560726 |
| 11 | 113185251..113254266 | TTC12 | 2.584495 | 4.64E-28 | 116 | 116 | 1.523756 | 107 | 107 | 1.417567 | 128 | 128 | 1.447564 | 227 | 227 | 3.874497 | 238 | 238 | 3.096516 | 285 | 285 | 3.298416 |
| 12 | 56511943..56516278 | ZC3H10 | 2.583743 | 5.95E-05 | 13 | 98 | 1.981801 | 16 | 131 | 2.671823 | 7 | 139 | 2.420021 | 19 | 181 | 4.75603 | 26 | 271 | 5.42803 | 33 | 294 | 5.238228 |
| 10 | 72058729..72142382 | LRRC20 | 2.583634 | 2.15E-24 | 263 | 263 | 5.164065 | 178 | 178 | 3.524993 | 293 | 293 | 4.953063 | 451 | 451 | 11.50653 | 519 | 519 | 10.09351 | 592 | 592 | 10.24143 |
| 9 | 132565432..132573560 | TOR1B | 2.580568 | 9.32E-46 | 279 | 279 | 6.675121 | 312 | 312 | 7.528559 | 377 | 377 | 7.76545 | 605 | 605 | 18.80799 | 700 | 700 | 16.58792 | 751 | 751 | 15.83062 |
| 12 | 48147699..48176536 | SLC48A1 | 2.575299 | 1.61E-51 | 232 | 233 | 3.297613 | 230 | 232 | 3.311571 | 285 | 286 | 3.484818 | 404 | 404 | 7.429459 | 567 | 567 | 7.948146 | 630 | 630 | 7.855746 |
| 4 | 125585207..125633887 | ANKRD50 | 2.57301 | 5.73E-59 | 440 | 440 | 3.484684 | 553 | 553 | 4.417109 | 682 | 682 | 4.650133 | 942 | 942 | 9.693791 | 1270 | 1270 | 9.962157 | 1349 | 1349 | 9.41295 |
| 7 | 72440227..72476445 | STAG3L3 | 2.572001 | 0.000234 | 29 | 93 | 1.777468 | 19 | 75 | 1.445714 | 15 | 100 | 1.645467 | 27 | 130 | 3.228451 | 36 | 161 | 3.04778 | 77 | 253 | 4.260322 |
| X | 294698..347690 | PPP2R3B | 2.570824 | 8.47E-41 | 199 | 199 | 1.537391 | 175 | 175 | 1.363552 | 211 | 213 | 1.416711 | 320 | 320 | 3.21228 | 459 | 459 | 3.512231 | 473 | 473 | 3.219554 |
| 5 | 77781038..78065844 | LHFPL2 | 2.569891 | 2.77E-60 | 621 | 621 | 5.42187 | 782 | 782 | 6.885994 | 918 | 918 | 6.900341 | 1397 | 1397 | 15.84842 | 1684 | 1684 | 14.56259 | 1826 | 1826 | 14.04628 |
| 17 | 27900487..27921072 | GIT1 | 2.565243 | 9.25E-46 | 463 | 962 | 11.8899 | 422 | 909 | 11.33103 | 461 | 941 | 10.01298 | 719 | 1397 | 22.43529 | 1004 | 1923 | 23.54081 | 1173 | 2306 | 25.11109 |
| 16 | 3631182..3661599 | SLX4 | 2.562813 | 6.44E-46 | 225 | 261 | 2.115894 | 197 | 242 | 1.97866 | 248 | 294 | 2.05197 | 395 | 458 | 4.824485 | 496 | 598 | 4.801684 | 532 | 634 | 4.52841 |
| 15 | 65950384..66084631 | DENND4A | 2.56145 | 6.61E-31 | 238 | 254 | 1.987208 | 324 | 349 | 2.753831 | 399 | 415 | 2.795297 | 568 | 592 | 6.018154 | 700 | 733 | 5.680055 | 756 | 781 | 5.383487 |
| 3 | 110788918..110994410 | PVRL3 | 2.561117 | 5.35E-30 | 279 | 279 | 3.142186 | 352 | 352 | 3.998275 | 483 | 483 | 4.683226 | 659 | 659 | 9.643732 | 818 | 818 | 9.124728 | 860 | 860 | 8.53354 |

| 1 | 26560691..26605299 | CEP85 | 2.560478 | 6.1E-23 | 70 | 70 | 0.947567 | 74 | 74 | 1.010289 | 77 | 77 | 0.897373 | 130 | 130 | 2.286584 | 165 | 165 | 2.212252 | 175 | 175 | 2.087146 |
| --- | --- | --- | --- | --- | --- | --- | --- | --- | --- | --- | --- | --- | --- | --- | --- | --- | --- | --- | --- | --- | --- | --- |
| 20 | 60528525..60640866 | TAF4 | 2.560061 | 4.64E-36 | 180 | 180 | 1.656051 | 146 | 146 | 1.354741 | 206 | 206 | 1.631694 | 287 | 287 | 3.430956 | 387 | 387 | 3.526559 | 460 | 460 | 3.728741 |
| 4 | 3508103..3534286 | LRPAP1 | 2.559938 | 8.91E-58 | 1721 | 1721 | 13.73923 | 1541 | 1544 | 12.43172 | 1751 | 1751 | 12.03477 | 2858 | 2860 | 29.66741 | 3874 | 3876 | 30.64815 | 3953 | 3958 | 27.83943 |
| 10 | 7200586..7453450 | SFMBT2 | 2.554001 | 2.62E-08 | 19 | 19 | 0.132926 | 30 | 30 | 0.21168 | 19 | 19 | 0.114441 | 37 | 37 | 0.336349 | 52 | 52 | 0.360328 | 56 | 56 | 0.345181 |
| 17 | 76000249..76104916 | TNRC6C | 2.55379 | 4.43E-41 | 275 | 302 | 1.902074 | 228 | 255 | 1.619806 | 277 | 312 | 1.691786 | 424 | 479 | 3.920019 | 574 | 635 | 3.961259 | 665 | 719 | 3.989813 |
| 8 | 125474726..125486817 | RNF139-AS1 | 2.552697 | 0.033218 | 2 | 2 | 0.023876 | 3 | 3 | 0.036121 | 8 | 8 | 0.082223 | 9 | 9 | 0.139606 | 10 | 10 | 0.118241 | 9 | 9 | 0.094662 |
| 6 | 160390131..160534539 | IGF2R | 2.549413 | 2.72E-14 | 6647 | 6647 | 46.48905 | 6582 | 6582 | 46.42856 | 8195 | 8195 | 49.34513 | 11991 | 11991 | 108.9714 | 15877 | 15877 | 109.9847 | 17445 | 17445 | 107.4977 |
| X | 66764465..66950461 | AR | 2.545976 | 1.95E-66 | 567 | 567 | 3.265203 | 540 | 540 | 3.136341 | 737 | 737 | 3.65397 | 1019 | 1019 | 7.624887 | 1318 | 1318 | 7.517641 | 1558 | 1558 | 7.904925 |
| 1 | 155023042..155035252 | ADAM15 | 2.544907 | 3.95E-98 | 827 | 827 | 8.746753 | 846 | 847 | 9.034978 | 975 | 976 | 8.887129 | 1450 | 1450 | 19.92698 | 1999 | 1999 | 20.94079 | 2161 | 2161 | 20.13721 |
| X | 105855160..105922672 | CXorf57 | 2.544776 | 1.17E-05 | 10 | 10 | 0.143512 | 13 | 13 | 0.188162 | 18 | 18 | 0.222397 | 25 | 25 | 0.466186 | 28 | 28 | 0.398001 | 34 | 34 | 0.429901 |
| 10 | 89264632..89313217 | MINPP1 | 2.544619 | 2.97E-43 | 262 | 262 | 6.050163 | 259 | 259 | 6.032091 | 385 | 385 | 7.654148 | 500 | 500 | 15.00265 | 657 | 657 | 15.02693 | 750 | 750 | 15.25914 |
| 7 | 23719749..23742868 | FAM221A | 2.543155 | 0.038997 | 6 | 6 | 0.056031 | 6 | 6 | 0.05651 | 2 | 2 | 0.01608 | 11 | 11 | 0.133475 | 14 | 14 | 0.129492 | 5 | 5 | 0.041138 |
| 11 | 33037410..33055128 | DEPDC7 | 2.542671 | 1.05E-14 | 37 | 37 | 0.774777 | 42 | 42 | 0.887006 | 51 | 51 | 0.919423 | 79 | 79 | 2.149483 | 100 | 100 | 2.074024 | 95 | 95 | 1.752676 |
| 17 | 28903482..28999807 | AC005562.1 | 2.541579 | 9.06E-08 | 15 | 39 | 0.914238 | 17 | 32 | 0.756566 | 31 | 53 | 1.069647 | 39 | 68 | 2.071264 | 38 | 88 | 2.043225 | 56 | 105 | 2.168637 |
| 1 | 235490665..235507847 | GGPS1 | 2.539399 | 1.66E-37 | 212 | 214 | 3.216982 | 278 | 278 | 4.214848 | 328 | 329 | 4.257955 | 450 | 451 | 8.809341 | 587 | 589 | 8.769788 | 686 | 687 | 9.099021 |
| 10 | 75561669..75571589 | NDST2 | 2.537259 | 4.65E-28 | 104 | 341 | 5.069229 | 88 | 259 | 3.883199 | 111 | 333 | 4.261889 | 171 | 518 | 10.00574 | 218 | 630 | 9.276135 | 250 | 763 | 9.993444 |
| 12 | 63037762..63328817 | PPM1H | 2.536071 | 4.95E-09 | 30 | 30 | 0.295821 | 30 | 30 | 0.298354 | 29 | 29 | 0.246193 | 49 | 49 | 0.627821 | 50 | 50 | 0.488334 | 90 | 90 | 0.781904 |
| 22 | 35776354..35790207 | HMOX1 | 2.535458 | 2.05E-81 | 2508 | 2508 | 72.62892 | 2526 | 2526 | 73.77644 | 2972 | 2972 | 74.0971 | 4379 | 4379 | 164.7741 | 5870 | 5870 | 168.3678 | 6661 | 6661 | 169.9513 |
| 2 | 39892122..39945103 | TMEM178A | 2.535244 | 9.76E-06 | 17 | 18 | 0.507543 | 11 | 11 | 0.31282 | 15 | 17 | 0.412686 | 26 | 26 | 0.952589 | 28 | 28 | 0.781983 | 37 | 37 | 0.919189 |
| 21 | 34106210..34144169 | PAXBP1 | 2.534897 | 4.97E-53 | 245 | 258 | 2.491501 | 256 | 276 | 2.688146 | 285 | 317 | 2.635548 | 448 | 498 | 6.248889 | 581 | 634 | 6.064146 | 625 | 677 | 5.760142 |
| 2 | 27422455..27435826 | SLC5A6 | 2.534486 | 2.14E-20 | 96 | 97 | 1.20508 | 95 | 101 | 1.265516 | 161 | 164 | 1.754116 | 194 | 201 | 3.244682 | 284 | 292 | 3.593072 | 256 | 267 | 2.922526 |
| 12 | 120740119..120751052 | SIRT4 | 2.532218 | 0.001307 | 6 | 6 | 0.341961 | 7 | 7 | 0.402371 | 12 | 12 | 0.588813 | 15 | 15 | 1.110834 | 17 | 17 | 0.959652 | 21 | 21 | 1.054504 |
| 2 | 132905164..133015542 | ANKRD30BL | 2.529067 | 0.036811 | 15 | 15 | 0.211177 | 28 | 28 | 0.397572 | 15 | 15 | 0.18181 | 24 | 24 | 0.439034 | 79 | 79 | 1.101593 | 21 | 21 | 0.260482 |
| 3 | 127872297..128127485 | EEFSEC | 2.528974 | 4.22E-34 | 144 | 165 | 4.754495 | 142 | 162 | 4.708015 | 145 | 163 | 4.043695 | 241 | 291 | 10.89546 | 308 | 348 | 9.932046 | 359 | 403 | 10.23125 |
| 6 | 36114475..36164982 | RP1-179N16.6 | 2.528806 | 0.017565 | 4 | 4 | 0.19042 | 7 | 7 | 0.336088 | 4 | 4 | 0.163939 | 10 | 10 | 0.618564 | 9 | 9 | 0.42436 | 13 | 13 | 0.545255 |
| 3 | 167967310..168548387 | EGFEM1P | 2.52476 | 0.01519 | 6 | 6 | 0.089712 | 4 | 4 | 0.06032 | 6 | 6 | 0.077236 | 11 | 11 | 0.213709 | 12 | 12 | 0.177712 | 11 | 11 | 0.144908 |
| 2 | 166713985..166810353 | TTC21B | 2.523025 | 1.21E-22 | 98 | 100 | 0.923934 | 96 | 97 | 0.903889 | 167 | 167 | 1.328397 | 214 | 218 | 2.617156 | 254 | 257 | 2.351869 | 280 | 284 | 2.311865 |
| 18 | 60190240..60254942 | ZCCHC2 | 2.522907 | 2.19E-33 | 195 | 195 | 1.339085 | 178 | 178 | 1.232809 | 192 | 192 | 1.135129 | 324 | 324 | 2.891017 | 379 | 379 | 2.577815 | 485 | 485 | 2.934394 |
| 17 | 26900133..26904282 | ALDOC | 2.520706 | 3.71E-31 | 192 | 387 | 9.20528 | 215 | 406 | 9.739898 | 201 | 407 | 8.334716 | 317 | 638 | 19.71872 | 483 | 871 | 20.52028 | 482 | 981 | 20.55882 |
| 7 | 102277472..102283238 | UPK3BL | 2.518862 | 0.001411 | 18 | 58 | 3.010042 | 0 | 2 | 0.104683 | 14 | 48 | 2.144649 | 19 | 59 | 3.978585 | 27 | 112 | 5.757072 | 21 | 68 | 3.109257 |
| 4 | 88896819..88904562 | SPP1 | 2.516585 | 0.01176 | 4 | 4 | 0.121759 | 6 | 6 | 0.184202 | 8 | 8 | 0.209653 | 14 | 14 | 0.553734 | 12 | 12 | 0.361794 | 12 | 12 | 0.321829 |
| 9 | 35161999..35405335 | UNC13B | 2.514559 | 4E-79 | 795 | 795 | 8.399377 | 896 | 896 | 9.547513 | 1074 | 1074 | 9.7691 | 1501 | 1501 | 20.60595 | 2021 | 2021 | 21.14878 | 2250 | 2250 | 20.94429 |
| 4 | 48137800..48271881 | TEC | 2.514158 | 1.25E-07 | 20 | 20 | 0.345638 | 21 | 21 | 0.366027 | 22 | 22 | 0.327329 | 38 | 38 | 0.853312 | 38 | 38 | 0.650451 | 56 | 56 | 0.852674 |
| 13 | 49063095..49107369 | RCBTB2 | 2.512775 | 7.31E-23 | 80 | 80 | 1.6244 | 63 | 63 | 1.290167 | 104 | 104 | 1.818054 | 142 | 142 | 3.74648 | 176 | 176 | 3.539604 | 196 | 196 | 3.506406 |
| 2 | 220154345..220174370 | PTPRN | 2.510924 | 7.26E-13 | 34 | 41 | 0.345659 | 34 | 41 | 0.348619 | 44 | 48 | 0.348398 | 61 | 65 | 0.712049 | 78 | 91 | 0.75988 | 95 | 114 | 0.846784 |
| 1 | 245003940..245018799 | HNRNPU-AS1 | 2.509813 | 2.2E-05 | 15 | 99 | 1.274957 | 14 | 96 | 1.246907 | 12 | 113 | 1.252879 | 23 | 183 | 3.062271 | 29 | 214 | 2.729689 | 34 | 195 | 2.212576 |
| 2 | 232597135..232650982 | PDE6D | 2.507644 | 3.29E-25 | 188 | 188 | 4.594202 | 186 | 186 | 4.584242 | 163 | 163 | 3.429337 | 284 | 284 | 9.017843 | 387 | 387 | 9.367037 | 461 | 461 | 9.92559 |
| 1 | 20209006..20239438 | OTUD3 | 2.505869 | 2.2E-22 | 72 | 72 | 0.741026 | 82 | 82 | 0.851172 | 81 | 81 | 0.717722 | 138 | 139 | 1.858865 | 166 | 166 | 1.692186 | 185 | 185 | 1.677551 |
| 3 | 133543083..133614680 | RAB6B | 2.504377 | 2.83E-08 | 28 | 32 | 0.371137 | 26 | 27 | 0.315828 | 19 | 20 | 0.199703 | 35 | 36 | 0.542524 | 56 | 57 | 0.654784 | 62 | 66 | 0.674421 |
| 18 | 21718942..21741567 | CABYR | 2.50401 | 2.29E-11 | 31 | 38 | 0.828342 | 33 | 46 | 1.011315 | 36 | 48 | 0.90082 | 63 | 81 | 2.294264 | 63 | 75 | 1.619297 | 82 | 125 | 2.400708 |
| 1 | 46252659..46501796 | MAST2 | 2.503895 | 1.13E-59 | 1223 | 1272 | 11.24666 | 1147 | 1182 | 10.54038 | 1266 | 1306 | 9.941451 | 1974 | 2019 | 23.19555 | 2580 | 2644 | 23.15457 | 3063 | 3135 | 24.42176 |
| 11 | 48002113..48189670 | PTPRJ | 2.501183 | 9.7E-26 | 133 | 133 | 1.346357 | 123 | 123 | 1.255787 | 150 | 150 | 1.307285 | 197 | 197 | 2.591236 | 288 | 288 | 2.887621 | 366 | 366 | 3.264321 |
| 14 | 58466453..58764857 | C14orf37 | 2.499531 | 8.28E-37 | 144 | 144 | 1.325717 | 177 | 177 | 1.643478 | 211 | 211 | 1.672403 | 285 | 285 | 3.409299 | 389 | 389 | 3.547127 | 430 | 430 | 3.487866 |
| 6 | 168227602..168372703 | MLLT4 | 2.498937 | 8.15E-70 | 682 | 682 | 3.53834 | 649 | 649 | 3.395957 | 795 | 795 | 3.551016 | 1102 | 1102 | 7.428974 | 1567 | 1567 | 8.05236 | 1766 | 1766 | 8.072518 |
| 6 | 107811162..107981357 | SOBP | 2.496464 | 2.77E-50 | 411 | 411 | 4.957494 | 421 | 421 | 5.12159 | 421 | 421 | 4.371926 | 693 | 693 | 10.8614 | 904 | 904 | 10.8001 | 1013 | 1013 | 10.76547 |
| 7 | 916189..936073 | GET4 | 2.496413 | 2.83E-36 | 153 | 536 | 6.923282 | 153 | 530 | 6.904392 | 176 | 609 | 6.772279 | 260 | 769 | 12.90642 | 369 | 988 | 12.63989 | 371 | 1068 | 12.15407 |
| 4 | 89442199..89629693 | HERC3 | 2.49468 | 2.96E-69 | 364 | 817 | 6.59033 | 371 | 796 | 6.475905 | 449 | 898 | 6.236368 | 641 | 979 | 10.26124 | 849 | 1275 | 10.18672 | 965 | 1414 | 10.04934 |
| X | 48770459..48776301 | PIM2 | 2.490619 | 1.65E-10 | 32 | 32 | 0.807199 | 32 | 32 | 0.81411 | 36 | 36 | 0.781814 | 52 | 52 | 1.704379 | 61 | 61 | 1.524051 | 95 | 95 | 2.111336 |
| 17 | 45400656..45518678 | EFCAB13 | 2.490042 | 6.52E-05 | 6 | 7 | 0.07307 | 17 | 17 | 0.178975 | 15 | 16 | 0.143791 | 19 | 19 | 0.257707 | 34 | 41 | 0.423901 | 26 | 32 | 0.294303 |

| 17 | 73823306..73840798 | UNC13D | 2.489289 | 9.63E-05 | 18 | 18 | 0.161717 | 8 | 8 | 0.07249 | 11 | 11 | 0.085084 | 21 | 21 | 0.245152 | 27 | 27 | 0.240263 | 29 | 29 | 0.229554 |
| --- | --- | --- | --- | --- | --- | --- | --- | --- | --- | --- | --- | --- | --- | --- | --- | --- | --- | --- | --- | --- | --- | --- |
| 6 | 131456806..131604675 | AKAP7 | 2.487366 | 2.27E-14 | 45 | 45 | 0.713263 | 37 | 37 | 0.591481 | 57 | 57 | 0.777826 | 68 | 68 | 1.400484 | 102 | 102 | 1.601313 | 118 | 118 | 1.647867 |
| 6 | 43395104..43418168 | ABCC10 | 2.485351 | 1.26E-59 | 447 | 448 | 3.860136 | 461 | 461 | 4.006155 | 500 | 500 | 3.709069 | 818 | 818 | 9.158196 | 998 | 998 | 8.517146 | 1084 | 1084 | 8.229187 |
| 6 | 42152139..42162654 | GUCA1B | 2.484428 | 0.044095 | 12 | 12 | 0.750902 | 3 | 3 | 0.189333 | 2 | 2 | 0.107746 | 4 | 4 | 0.325233 | 16 | 16 | 0.991656 | 16 | 16 | 0.882115 |
| 7 | 75471920..75518244 | RHBDD2 | 2.483049 | 2.62E-75 | 456 | 456 | 13.01051 | 481 | 481 | 13.8413 | 575 | 575 | 14.12432 | 811 | 811 | 30.06646 | 1071 | 1071 | 30.26619 | 1240 | 1240 | 31.17125 |
| 5 | 140767452..140892546 | PCDHGB4 | 2.482697 | 5.93E-06 | 10 | 10 | 0.152132 | 14 | 14 | 0.214809 | 22 | 22 | 0.288147 | 28 | 28 | 0.553492 | 34 | 34 | 0.512318 | 33 | 33 | 0.442322 |
| 1 | 154929502..154936329 | PYGO2 | 2.481041 | 9.4E-47 | 373 | 373 | 7.156478 | 316 | 316 | 6.114767 | 463 | 463 | 7.647893 | 616 | 616 | 15.35689 | 824 | 824 | 15.65874 | 931 | 931 | 15.73777 |
| 15 | 23043277..23100005 | NIPA1 | 2.4787 | 3.8E-34 | 162 | 162 | 1.296859 | 202 | 202 | 1.630916 | 231 | 231 | 1.592063 | 353 | 353 | 3.671848 | 413 | 413 | 3.274665 | 451 | 452 | 3.188008 |
| 13 | 103418340..103426161 | TEX30 | 2.476352 | 1.21E-14 | 44 | 44 | 1.42267 | 48 | 48 | 1.565291 | 57 | 57 | 1.586707 | 74 | 74 | 3.108961 | 123 | 123 | 3.939087 | 110 | 110 | 3.133627 |
| 7 | 74807499..74867509 | GATSL2 | 2.473755 | 5.35E-16 | 49 | 112 | 5.6937 | 40 | 104 | 5.332271 | 71 | 132 | 5.777246 | 90 | 165 | 10.89915 | 113 | 198 | 9.969669 | 125 | 249 | 11.15267 |
| 2 | 170683968..170940641 | UBR3 | 2.471652 | 2.25E-64 | 501 | 501 | 3.434323 | 570 | 570 | 3.940766 | 691 | 691 | 4.078043 | 969 | 969 | 8.630963 | 1271 | 1271 | 8.629546 | 1364 | 1364 | 8.237983 |
| 16 | 25247322..25269252 | ZKSCAN2 | 2.470245 | 1.15E-25 | 104 | 111 | 0.969978 | 106 | 108 | 0.951842 | 121 | 125 | 0.940414 | 201 | 218 | 2.475297 | 214 | 233 | 2.016665 | 262 | 282 | 2.171156 |
| 7 | 34968488..35077883 | DPY19L1 | 2.465826 | 8.81E-44 | 294 | 311 | 3.801326 | 326 | 339 | 4.179042 | 443 | 464 | 4.882733 | 603 | 629 | 9.989814 | 741 | 774 | 9.370325 | 815 | 837 | 9.013703 |
| 17 | 33570055..33600674 | SLFN5 | 2.462727 | 3.55E-80 | 3262 | 3263 | 21.22097 | 3470 | 3470 | 22.76041 | 4169 | 4169 | 23.34267 | 6056 | 6056 | 51.17598 | 7679 | 7679 | 49.4643 | 8481 | 8481 | 48.59576 |
| 16 | 451826..462487 | DECR2 | 2.462304 | 1.53E-36 | 273 | 306 | 5.399474 | 266 | 305 | 5.427904 | 271 | 336 | 5.10434 | 430 | 499 | 11.44096 | 618 | 681 | 11.90189 | 616 | 719 | 11.17795 |
| 17 | 27952956..28257294 | SSH2 | 2.459068 | 4.77E-26 | 95 | 480 | 2.651503 | 116 | 521 | 2.902625 | 134 | 631 | 3.000894 | 207 | 991 | 7.113063 | 232 | 1402 | 7.670752 | 262 | 1415 | 6.886689 |
| X | 71346958..71351758 | RGAG4 | 2.456816 | 1.67E-05 | 11 | 253 | 3.671698 | 12 | 245 | 3.586037 | 24 | 281 | 3.510937 | 24 | 507 | 9.560628 | 42 | 740 | 10.63695 | 30 | 787 | 10.06292 |
| 6 | 34204650..34214008 | HMGA1 | 2.456577 | 3.71E-50 | 7574 | 8143 | 243.7166 | 6537 | 7033 | 212.2969 | 7764 | 8432 | 217.271 | 11321 | 12198 | 474.3746 | 15851 | 17163 | 508.7834 | 17863 | 19458 | 513.1001 |
| 14 | 53019866..53104431 | GPR137C | 2.452498 | 0.003191 | 10 | 10 | 0.112459 | 5 | 5 | 0.056711 | 8 | 8 | 0.077456 | 20 | 20 | 0.292252 | 15 | 15 | 0.167081 | 12 | 12 | 0.1189 |
| 3 | 14444076..14530857 | SLC6A6 | 2.451996 | 3.93E-76 | 1026 | 1027 | 8.657298 | 1096 | 1099 | 9.343551 | 1191 | 1196 | 8.679875 | 1732 | 1732 | 18.97107 | 2426 | 2429 | 20.28049 | 2620 | 2627 | 19.5108 |
| 4 | 83821837..83841122 | THAP9 | 2.451506 | 0.021601 | 3 | 7 | 0.11254 | 6 | 22 | 0.356725 | 7 | 17 | 0.235303 | 11 | 29 | 0.605813 | 9 | 21 | 0.334401 | 13 | 26 | 0.368286 |
| 19 | 19649057..19657468 | CILP2 | 2.449707 | 5.48E-08 | 27 | 27 | 0.431295 | 22 | 22 | 0.354434 | 24 | 24 | 0.330059 | 38 | 38 | 0.788726 | 60 | 60 | 0.949294 | 51 | 51 | 0.717768 |
| 2 | 10443015..10567743 | HPCAL1 | 2.448256 | 1.08E-50 | 381 | 381 | 4.675803 | 355 | 356 | 4.406397 | 387 | 387 | 4.088957 | 604 | 604 | 9.631641 | 801 | 801 | 9.736498 | 887 | 887 | 9.59087 |
| 3 | 78646390..79816965 | ROBO1 | 2.447946 | 2.89E-95 | 1308 | 1308 | 8.386777 | 1341 | 1341 | 8.671983 | 1564 | 1564 | 8.633649 | 2228 | 2228 | 18.56242 | 2910 | 2910 | 18.48074 | 3457 | 3457 | 19.52944 |
| 19 | 58878985..58892427 | ZNF837 | 2.447936 | 5.11E-09 | 26 | 26 | 0.872254 | 27 | 27 | 0.913557 | 27 | 27 | 0.779837 | 46 | 46 | 2.005209 | 55 | 55 | 1.827559 | 62 | 62 | 1.832587 |
| 19 | 13263885..13265007 | CTC-250I14.6 | 2.447544 | 0.030239 | 2 | 9 | 0.662596 | 6 | 9 | 0.668268 | 8 | 15 | 0.950753 | 7 | 9 | 0.860955 | 12 | 22 | 1.604234 | 14 | 24 | 1.556755 |
| 7 | 112120908..112131117 | LSMEM1 | 2.445933 | 0.017352 | 7 | 7 | 0.188088 | 3 | 3 | 0.081299 | 8 | 8 | 0.185064 | 12 | 12 | 0.418963 | 7 | 7 | 0.186294 | 18 | 18 | 0.426126 |
| 10 | 27220135..27230930 | LINC00202-1 | 2.44213 | 0.039867 | 4 | 4 | 0.056854 | 12 | 12 | 0.172022 | 0 | 0 | 0 | 10 | 10 | 0.184686 | 10 | 10 | 0.14078 | 13 | 13 | 0.162797 |
| 3 | 136560568..136580896 | RP11-85F14.5 | 2.441836 | 0.013552 | 6 | 9 | 0.438639 | 7 | 10 | 0.491549 | 7 | 12 | 0.50352 | 14 | 19 | 1.203235 | 7 | 11 | 0.531003 | 20 | 27 | 1.159396 |
| 20 | 34213953..34252878 | CPNE1 | 2.441095 | 7.3E-102 | 1263 | 1329 | 25.65403 | 1207 | 1270 | 24.72502 | 1434 | 1530 | 25.42684 | 2102 | 2179 | 54.65374 | 2768 | 2872 | 54.91033 | 3054 | 3160 | 53.74286 |
| 19 | 54960065..54973217 | LENG8 | 2.439706 | 1.23E-41 | 2107 | 2117 | 22.78839 | 1939 | 1952 | 21.19215 | 2010 | 2024 | 18.75745 | 3277 | 3288 | 45.98929 | 4163 | 4176 | 44.52381 | 4942 | 4969 | 47.12648 |
| 19 | 19896648..19932560 | ZNF506 | 2.438046 | 3.01E-05 | 11 | 53 | 0.667736 | 10 | 61 | 0.775106 | 21 | 87 | 0.943667 | 29 | 85 | 1.39149 | 28 | 108 | 1.347696 | 28 | 148 | 1.642835 |
| 9 | 74298282..74431606 | TMEM2 | 2.437503 | 3.16E-55 | 460 | 460 | 3.328543 | 552 | 552 | 4.028448 | 591 | 591 | 3.681749 | 854 | 854 | 8.02946 | 1125 | 1125 | 8.062837 | 1271 | 1271 | 8.102985 |
| 3 | 190231840..190375843 | IL1RAP | 2.436746 | 1.98E-11 | 33 | 33 | 0.239508 | 40 | 40 | 0.292799 | 46 | 46 | 0.287432 | 70 | 70 | 0.660141 | 94 | 94 | 0.675731 | 76 | 76 | 0.485986 |
| 2 | 128994290..129076151 | HS6ST1 | 2.436332 | 6.85E-49 | 871 | 1006 | 14.96136 | 751 | 879 | 13.18452 | 907 | 1043 | 13.3545 | 1302 | 1500 | 28.98653 | 1798 | 2031 | 29.91726 | 2053 | 2324 | 30.45175 |
| 2 | 71409869..71454213 | PAIP2B | 2.433029 | 0.020145 | 6 | 6 | 0.066552 | 7 | 7 | 0.078308 | 6 | 6 | 0.057297 | 6 | 6 | 0.086475 | 13 | 13 | 0.14282 | 20 | 20 | 0.195452 |
| 10 | 119040000..119134978 | PDZD8 | 2.432322 | 9.62E-59 | 370 | 370 | 3.865748 | 419 | 419 | 4.415177 | 505 | 505 | 4.542485 | 700 | 701 | 9.516602 | 886 | 887 | 9.17898 | 1023 | 1026 | 9.444572 |
| 10 | 72972327..73062621 | UNC5B | 2.430402 | 1.29E-63 | 733 | 733 | 7.462451 | 659 | 659 | 6.766519 | 780 | 780 | 6.836636 | 1188 | 1188 | 15.71542 | 1549 | 1549 | 15.61953 | 1648 | 1648 | 14.78216 |
| 6 | 34214157..34217247 | C6orf1 | 2.429516 | 6.51E-30 | 543 | 543 | 16.96629 | 492 | 492 | 15.50438 | 527 | 527 | 14.17647 | 828 | 828 | 33.61627 | 994 | 994 | 30.76185 | 1364 | 1364 | 37.54953 |
| 3 | 51575160..51702683 | RAD54L2 | 2.428339 | 1.91E-40 | 209 | 376 | 2.324011 | 202 | 416 | 2.593259 | 262 | 498 | 2.650025 | 366 | 695 | 5.581709 | 494 | 920 | 5.632188 | 493 | 914 | 4.977366 |
| 17 | 6917814..6920844 | C17orf49 | 2.425706 | 7.32E-34 | 143 | 458 | 12.13772 | 152 | 494 | 13.20386 | 197 | 578 | 13.18773 | 252 | 665 | 22.89947 | 340 | 982 | 25.7764 | 400 | 1150 | 26.85176 |
| 17 | 17746828..17875736 | TOM1L2 | 2.42506 | 9.49E-97 | 1022 | 1022 | 9.055772 | 983 | 983 | 8.784771 | 1189 | 1189 | 9.070407 | 1701 | 1701 | 19.58443 | 2201 | 2201 | 19.31673 | 2540 | 2540 | 19.82948 |
| 10 | 1085848..1095110 | IDI1 | 2.424902 | 1.14E-19 | 269 | 912 | 17.69777 | 323 | 1095 | 21.43089 | 487 | 1491 | 24.90988 | 641 | 1820 | 45.89096 | 718 | 2170 | 41.70829 | 765 | 2336 | 39.93922 |
| 17 | 80416056..80448413 | NARF | 2.424151 | 7.22E-45 | 279 | 292 | 2.561617 | 263 | 273 | 2.41544 | 298 | 313 | 2.363992 | 437 | 448 | 5.106712 | 584 | 599 | 5.204717 | 677 | 698 | 5.39498 |
| 10 | 25305587..25315593 | THNSL1 | 2.422874 | 5.22E-10 | 21 | 21 | 0.386106 | 28 | 28 | 0.519215 | 47 | 47 | 0.74397 | 50 | 50 | 1.194508 | 69 | 69 | 1.256537 | 74 | 74 | 1.198732 |
| 14 | 91336799..91526980 | RPS6KA5 | 2.422269 | 3.64E-07 | 23 | 26 | 0.352776 | 13 | 14 | 0.191583 | 32 | 34 | 0.397169 | 44 | 46 | 0.81099 | 50 | 53 | 0.712264 | 42 | 44 | 0.525995 |
| 16 | 2563871..2570219 | ATP6V0C | 2.421243 | 6.99E-49 | 734 | 1957 | 90.98633 | 635 | 1772 | 83.0905 | 829 | 2213 | 88.58028 | 1138 | 2818 | 170.2387 | 1485 | 3995 | 183.9675 | 1815 | 4985 | 204.199 |
| 1 | 156698234..156706752 | RRNAD1 | 2.418361 | 2.84E-32 | 140 | 144 | 3.164735 | 144 | 148 | 3.280492 | 160 | 162 | 3.06521 | 253 | 260 | 7.424724 | 304 | 307 | 6.682704 | 333 | 337 | 6.525412 |
| 4 | 57259528..57301781 | PPAT | 2.416987 | 3.72E-19 | 105 | 107 | 1.37013 | 127 | 130 | 1.678896 | 142 | 146 | 1.609538 | 222 | 229 | 3.810181 | 282 | 291 | 3.690711 | 239 | 246 | 2.775341 |

| X | 48689504..48694035 | PCSK1N | 2.415102 | 5.05E-05 | 16 | 16 | 0.827274 | 15 | 15 | 0.78221 | 13 | 13 | 0.578686 | 21 | 21 | 1.41085 | 26 | 26 | 1.331502 | 42 | 42 | 1.913295 |
| --- | --- | --- | --- | --- | --- | --- | --- | --- | --- | --- | --- | --- | --- | --- | --- | --- | --- | --- | --- | --- | --- | --- |
| 10 | 59951278..60027694 | IPMK | 2.412934 | 8.81E-19 | 58 | 58 | 0.658646 | 65 | 66 | 0.755911 | 100 | 101 | 0.987452 | 123 | 124 | 1.829692 | 154 | 154 | 1.732144 | 168 | 169 | 1.690885 |
| 15 | 47476298..48066420 | SEMA6D | 2.412741 | 1.19E-14 | 44 | 44 | 0.357994 | 68 | 68 | 0.558001 | 94 | 94 | 0.658448 | 117 | 117 | 1.236919 | 130 | 130 | 1.047625 | 163 | 163 | 1.168461 |
| 16 | 4743695..4745860 | NUDT16L1 | 2.411112 | 1.34E-36 | 201 | 201 | 6.769283 | 226 | 226 | 7.676396 | 221 | 221 | 6.407804 | 337 | 337 | 14.74717 | 456 | 456 | 15.21074 | 510 | 510 | 15.13282 |
| 5 | 52083730..52255040 | ITGA1 | 2.409571 | 2.65E-48 | 265 | 344 | 1.290438 | 291 | 386 | 1.460389 | 360 | 476 | 1.537291 | 473 | 609 | 2.968439 | 641 | 807 | 2.998412 | 719 | 913 | 3.017538 |
| X | 47441712..47446188 | TIMP1 | 2.407795 | 8.8E-41 | 10027 | 12823 | 498.9232 | 8315 | 11405 | 447.5502 | 10198 | 13790 | 461.9327 | 14311 | 18878 | 954.4038 | 20100 | 25703 | 990.5283 | 23251 | 30903 | 1059.37 |
| 5 | 131817301..131826490 | IRF1 | 2.406709 | 1.96E-49 | 407 | 408 | 3.643497 | 354 | 354 | 3.188334 | 445 | 445 | 3.421279 | 665 | 666 | 7.727954 | 842 | 843 | 7.456324 | 898 | 900 | 7.081151 |
| 10 | 134020996..134145351 | STK32C | 2.399679 | 3.67E-24 | 194 | 194 | 3.813535 | 181 | 181 | 3.58845 | 182 | 182 | 3.08012 | 277 | 277 | 7.075185 | 434 | 434 | 8.449961 | 407 | 407 | 7.048935 |
| 19 | 4343524..4360083 | MPND | 2.399537 | 1.2E-20 | 208 | 214 | 7.273927 | 193 | 197 | 6.753419 | 169 | 173 | 5.062577 | 292 | 299 | 13.20561 | 418 | 422 | 14.20714 | 439 | 444 | 13.29662 |
| 5 | 179261436..179289173 | C5orf45 | 2.397174 | 1.57E-22 | 107 | 320 | 2.424319 | 107 | 300 | 2.292258 | 99 | 338 | 2.204585 | 158 | 1166 | 11.47811 | 217 | 1474 | 11.06054 | 252 | 1662 | 11.09364 |
| 17 | 39845137..39848920 | EIF1 | 2.397081 | 1.18E-37 | 1742 | 3486 | 67.01256 | 1959 | 3738 | 72.47203 | 2510 | 4709 | 77.93415 | 3497 | 6058 | 151.3178 | 4486 | 7876 | 149.9593 | 4200 | 8280 | 140.2369 |
| 15 | 42066632..42120053 | MAPKBP1 | 2.396571 | 5.01E-51 | 377 | 587 | 3.94731 | 330 | 526 | 3.567395 | 442 | 670 | 3.878897 | 622 | 898 | 7.84642 | 777 | 1151 | 7.666153 | 883 | 1307 | 7.743581 |
| 1 | 241753404..241840678 | OPN3 | 2.396365 | 1.19E-15 | 68 | 96 | 1.921273 | 51 | 65 | 1.311999 | 65 | 98 | 1.688551 | 90 | 155 | 4.030711 | 124 | 214 | 4.242 | 154 | 262 | 4.619791 |
| 14 | 104200089..104313927 | PPP1R13B | 2.396335 | 1.16E-20 | 128 | 128 | 0.987123 | 156 | 156 | 1.213356 | 133 | 133 | 0.883046 | 198 | 198 | 1.984077 | 298 | 298 | 2.276232 | 344 | 344 | 2.337345 |
| 19 | 14627897..14676792 | TECR | 2.3943 | 3.95E-57 | 650 | 773 | 18.36169 | 618 | 729 | 17.46478 | 763 | 900 | 18.40543 | 1023 | 1180 | 36.42061 | 1380 | 1611 | 37.90249 | 1655 | 1977 | 41.37547 |
| 18 | 48494361..48514491 | ELAC1 | 2.389291 | 2.37E-07 | 17 | 66 | 1.365611 | 28 | 77 | 1.606853 | 25 | 92 | 1.638857 | 43 | 113 | 3.03804 | 44 | 143 | 2.93061 | 52 | 160 | 2.916796 |
| 19 | 28284371..28409771 | CTC-459F4.3 | 2.388977 | 0.006349 | 5 | 20 | 0.41817 | 7 | 46 | 0.970024 | 9 | 47 | 0.84604 | 14 | 63 | 1.711572 | 16 | 52 | 1.076874 | 12 | 61 | 1.123713 |
| 16 | 29916333..29938356 | KCTD13 | 2.387967 | 9.14E-21 | 112 | 178 | 2.550301 | 93 | 144 | 2.080829 | 136 | 185 | 2.281989 | 154 | 236 | 4.39355 | 252 | 361 | 5.122922 | 274 | 362 | 4.569653 |
| 3 | 15642848..15687329 | BTD | 2.386725 | 9.78E-29 | 125 | 125 | 2.35037 | 155 | 155 | 2.93941 | 151 | 151 | 2.444407 | 227 | 229 | 5.594918 | 293 | 295 | 5.493981 | 336 | 337 | 5.582891 |
| 6 | 126102307..126252266 | NCOA7 | 2.385532 | 7.39E-56 | 421 | 421 | 4.352238 | 386 | 386 | 4.024577 | 478 | 478 | 4.254307 | 687 | 688 | 9.241683 | 857 | 857 | 8.775066 | 1002 | 1003 | 9.135549 |
| 16 | 1401924..1413352 | GNPTG | 2.384741 | 2.6E-38 | 1089 | 1095 | 20.76866 | 976 | 983 | 18.804 | 1063 | 1076 | 17.57021 | 1589 | 1612 | 39.72753 | 2101 | 2118 | 39.78867 | 2575 | 2595 | 43.36456 |
| 18 | 21083473..21111746 | C18orf8 | 2.384124 | 6.55E-32 | 143 | 161 | 3.705562 | 163 | 180 | 4.178333 | 189 | 212 | 4.200823 | 259 | 276 | 8.254093 | 322 | 346 | 7.887571 | 400 | 436 | 8.841334 |
| 16 | 4295826..4303790 | RP11-95P2.1 | 2.384066 | 0.00072 | 9 | 9 | 0.27613 | 12 | 12 | 0.371326 | 15 | 15 | 0.396217 | 15 | 15 | 0.597991 | 19 | 19 | 0.577383 | 38 | 38 | 1.027207 |
| 9 | 100883257..100954922 | CORO2A | 2.382217 | 0.023405 | 6 | 6 | 0.073094 | 7 | 7 | 0.086006 | 5 | 5 | 0.052441 | 14 | 14 | 0.22161 | 8 | 8 | 0.096529 | 14 | 14 | 0.150266 |
| 1 | 44440159..44443967 | ATP6V0B | 2.381925 | 8.77E-65 | 487 | 487 | 9.594816 | 478 | 478 | 9.498126 | 627 | 627 | 10.6352 | 827 | 827 | 21.17119 | 1119 | 1119 | 21.83619 | 1197 | 1197 | 20.77806 |
| 17 | 79825597..79826428 | RP11-498C9.3 | 2.380748 | 2.04E-05 | 8 | 10 | 0.913991 | 18 | 23 | 2.120178 | 22 | 34 | 2.675417 | 27 | 44 | 5.225489 | 37 | 54 | 4.888492 | 31 | 41 | 3.301636 |
| 10 | 64571756..64679660 | EGR2 | 2.380389 | 0.005742 | 7 | 7 | 0.132156 | 10 | 10 | 0.19041 | 7 | 7 | 0.113778 | 10 | 10 | 0.245313 | 16 | 16 | 0.29919 | 22 | 22 | 0.365944 |
| 4 | 186125391..186291339 | SNX25 | 2.378432 | 7.77E-31 | 155 | 159 | 2.424729 | 177 | 177 | 2.722336 | 196 | 200 | 2.625829 | 285 | 296 | 5.865295 | 386 | 388 | 5.860529 | 369 | 381 | 5.119107 |
| 17 | 72743458..72745051 | MIR3615_1 | 2.376936 | 0.020165 | 29 | 38 | 4.684166 | 4 | 5 | 0.621614 | 33 | 38 | 4.032762 | 24 | 28 | 4.484756 | 49 | 58 | 7.081344 | 59 | 75 | 8.145412 |
| X | 153686621..153701989 | PLXNA3 | 2.374654 | 1.63E-50 | 1310 | 1310 | 12.04124 | 1199 | 1199 | 11.1153 | 1360 | 1360 | 10.7624 | 1949 | 1949 | 23.2779 | 2648 | 2648 | 24.10776 | 3099 | 3099 | 25.09716 |
| 5 | 139712428..139726216 | HBEGF | 2.37423 | 8.47E-18 | 60 | 60 | 1.384615 | 69 | 69 | 1.60594 | 74 | 74 | 1.470212 | 104 | 104 | 3.118482 | 137 | 137 | 3.131392 | 160 | 160 | 3.253127 |
| 2 | 220040947..220050201 | FAM134A | 2.37304 | 4E-100 | 1648 | 1652 | 20.22419 | 1579 | 1579 | 19.49601 | 1871 | 1871 | 19.71993 | 2660 | 2660 | 42.31311 | 3552 | 3554 | 43.09408 | 3848 | 3850 | 41.52647 |
| 17 | 55155659..55162385 | RP11-166P13.3 | 2.371807 | 0.004617 | 9 | 9 | 0.733117 | 12 | 12 | 0.985858 | 6 | 6 | 0.420778 | 9 | 9 | 0.952589 | 17 | 17 | 1.371573 | 28 | 28 | 2.009519 |
| 3 | 183353356..183402265 | KLHL24 | 2.369935 | 1.83E-28 | 388 | 388 | 3.124012 | 497 | 497 | 4.035894 | 654 | 654 | 4.533453 | 823 | 823 | 8.610194 | 1045 | 1046 | 8.341645 | 1129 | 1129 | 8.008996 |
| 14 | 20937113..20945253 | PNP | 2.369738 | 1.9E-13 | 75 | 116 | 1.95191 | 83 | 127 | 2.1553 | 70 | 122 | 1.767388 | 108 | 157 | 3.432681 | 141 | 231 | 3.849929 | 206 | 308 | 4.566206 |
| 2 | 118673054..118771709 | CCDC93 | 2.369566 | 4.47E-40 | 338 | 716 | 6.183093 | 298 | 746 | 6.497315 | 358 | 990 | 7.360347 | 546 | 1225 | 13.74551 | 695 | 1593 | 13.62535 | 710 | 1619 | 12.31807 |
| 1 | 11333263..11356106 | UBIAD1 | 2.366607 | 1.44E-24 | 123 | 123 | 1.685651 | 99 | 99 | 1.368359 | 124 | 126 | 1.486632 | 174 | 174 | 3.098445 | 240 | 240 | 3.257712 | 268 | 269 | 3.248014 |
| 21 | 34931848..34961014 | DONSON | 2.36538 | 3.11E-18 | 58 | 90 | 1.784274 | 67 | 92 | 1.83954 | 84 | 111 | 1.894577 | 112 | 154 | 3.967087 | 144 | 193 | 3.789791 | 154 | 204 | 3.563299 |
| 1 | 204042243..204096863 | SOX13 | 2.365245 | 4.48E-13 | 117 | 117 | 1.099379 | 121 | 121 | 1.146699 | 92 | 92 | 0.744252 | 159 | 159 | 1.941292 | 213 | 213 | 1.98235 | 289 | 289 | 2.392559 |
| 1 | 100810584..100985833 | CDC14A | 2.361058 | 7.52E-09 | 29 | 29 | 0.352546 | 32 | 32 | 0.392347 | 28 | 28 | 0.293053 | 47 | 48 | 0.758214 | 63 | 64 | 0.770615 | 65 | 66 | 0.706912 |
| 4 | 141780961..142134031 | RNF150 | 2.354851 | 7.4E-18 | 69 | 69 | 0.436593 | 71 | 71 | 0.453095 | 88 | 88 | 0.479381 | 115 | 115 | 0.945492 | 141 | 141 | 0.883662 | 191 | 191 | 1.064792 |
| 16 | 29495010..29517320 | RP11-231C14.4 | 2.354025 | 0.000946 | 10 | 18 | 0.294972 | 9 | 24 | 0.396663 | 12 | 70 | 0.98759 | 18 | 51 | 1.085952 | 17 | 79 | 1.282255 | 26 | 91 | 1.313871 |
| 14 | 74424713..74486102 | ENTPD5 | 2.353508 | 7.15E-34 | 155 | 169 | 1.13404 | 166 | 187 | 1.265568 | 192 | 214 | 1.236305 | 262 | 279 | 2.43264 | 341 | 375 | 2.492366 | 401 | 429 | 2.536308 |
| 7 | 17338246..17385776 | AHR | 2.352727 | 3.63E-28 | 418 | 612 | 6.398956 | 549 | 728 | 7.676997 | 690 | 851 | 7.660508 | 880 | 1126 | 15.29777 | 1067 | 1399 | 14.4882 | 1265 | 1618 | 14.90525 |
| 1 | 16787443..16794976 | RP4-798A10.2 | 2.350041 | 0.002474 | 9 | 13 | 0.279014 | 10 | 15 | 0.324695 | 9 | 15 | 0.277169 | 19 | 22 | 0.613532 | 14 | 18 | 0.382643 | 22 | 34 | 0.642931 |
| 1 | 26798941..26802463 | HMGN2 | 2.34929 | 8.61E-33 | 2016 | 2534 | 70.34012 | 1708 | 2282 | 63.88728 | 1868 | 2567 | 61.34691 | 2795 | 3826 | 137.9982 | 3853 | 5272 | 144.9475 | 4394 | 5672 | 138.719 |
| 12 | 117176096..117291436 | RNFT2 | 2.347202 | 3.05E-05 | 10 | 10 | 0.113209 | 20 | 20 | 0.228356 | 18 | 18 | 0.175438 | 23 | 23 | 0.33833 | 36 | 36 | 0.403666 | 35 | 35 | 0.349102 |
| X | 148558521..148615470 | IDS_1 | 2.346977 | 2.03E-32 | 680 | 935 | 5.876649 | 726 | 974 | 6.174182 | 1085 | 1369 | 7.407846 | 1282 | 1626 | 13.27917 | 1648 | 2140 | 13.32205 | 1880 | 2489 | 13.78308 |
| 1 | 101702444..101707074 | S1PR1 | 2.346844 | 5.38E-28 | 154 | 154 | 3.492513 | 196 | 196 | 4.483072 | 232 | 232 | 4.529765 | 294 | 294 | 8.663566 | 373 | 373 | 8.378478 | 468 | 468 | 9.351177 |

| 5 | 37812779..37839788 | GDNF | 2.343838 | 7.84E-07 | 26 | 26 | 0.431863 | 25 | 25 | 0.418808 | 19 | 19 | 0.271704 | 36 | 36 | 0.776975 | 44 | 44 | 0.723876 | 57 | 57 | 0.834162 |
| --- | --- | --- | --- | --- | --- | --- | --- | --- | --- | --- | --- | --- | --- | --- | --- | --- | --- | --- | --- | --- | --- | --- |
| 22 | 38615298..38669040 | TMEM184B | 2.343407 | 1.2E-60 | 1217 | 1446 | 20.08543 | 1270 | 1429 | 20.01923 | 1343 | 1575 | 18.83492 | 1919 | 2253 | 40.66362 | 2640 | 3051 | 41.97532 | 2945 | 3454 | 42.27058 |
| 10 | 94590935..94819250 | EXOC6 | 2.343004 | 8.98E-13 | 73 | 73 | 0.799523 | 99 | 99 | 1.093568 | 163 | 163 | 1.536973 | 170 | 170 | 2.419298 | 229 | 229 | 2.484178 | 245 | 245 | 2.364164 |
| 17 | 40731531..40762641 | FAM134C | 2.341612 | 1.89E-60 | 642 | 642 | 8.69054 | 610 | 610 | 8.328061 | 740 | 741 | 8.635755 | 1048 | 1048 | 18.43339 | 1391 | 1391 | 18.64996 | 1427 | 1427 | 17.01919 |
| 6 | 18155560..18224084 | KDM1B | 2.340983 | 1.86E-36 | 257 | 257 | 3.863385 | 275 | 275 | 4.169364 | 358 | 358 | 4.633276 | 443 | 443 | 8.653078 | 572 | 572 | 8.516671 | 717 | 717 | 9.496359 |
| 11 | 61640991..61659523 | FADS3 | 2.34098 | 8.59E-64 | 1252 | 1252 | 13.87824 | 1179 | 1179 | 13.18093 | 1336 | 1336 | 12.7499 | 1911 | 1911 | 27.52471 | 2594 | 2594 | 28.47994 | 2854 | 2854 | 27.87322 |
| 11 | 61717293..61732987 | BEST1 | 2.340169 | 3.42E-15 | 69 | 135 | 1.052881 | 74 | 121 | 0.951773 | 95 | 162 | 1.087755 | 98 | 177 | 1.793705 | 178 | 287 | 2.217004 | 190 | 307 | 2.109537 |
| 1 | 84330711..84464833 | TTLL7 | 2.34011 | 2.21E-34 | 274 | 274 | 1.81002 | 318 | 319 | 2.125328 | 436 | 436 | 2.479646 | 533 | 533 | 4.575012 | 696 | 697 | 4.560418 | 755 | 757 | 4.405872 |
| 1 | 45809555..45956872 | TESK2 | 2.339022 | 1.19E-14 | 75 | 75 | 1.509671 | 63 | 63 | 1.27898 | 67 | 67 | 1.161091 | 121 | 121 | 3.164743 | 120 | 120 | 2.392441 | 157 | 157 | 2.78435 |
| 17 | 72744791..72765492 | SLC9A3R1 | 2.338462 | 1.51E-23 | 748 | 797 | 23.97753 | 595 | 629 | 19.0853 | 635 | 677 | 17.53497 | 997 | 1054 | 41.20205 | 1377 | 1449 | 43.1771 | 1513 | 1597 | 42.33058 |
| 1 | 24104895..24114722 | PITHD1 | 2.338303 | 2.4E-40 | 246 | 246 | 7.837582 | 285 | 285 | 9.157863 | 302 | 302 | 8.283698 | 416 | 416 | 17.22156 | 575 | 575 | 18.14487 | 631 | 631 | 17.71248 |
| 3 | 36421836..36589499 | STAC | 2.338218 | 2.57E-12 | 53 | 53 | 0.839683 | 55 | 55 | 0.878829 | 46 | 46 | 0.627433 | 77 | 77 | 1.58512 | 95 | 95 | 1.49074 | 129 | 129 | 1.800662 |
| 1 | 2160134..2241558 | SKI | 2.338077 | 1.96E-78 | 2934 | 2934 | 33.60885 | 2803 | 2803 | 32.38314 | 3181 | 3181 | 31.37094 | 4547 | 4547 | 67.67848 | 6069 | 6069 | 68.85725 | 6782 | 6782 | 68.44701 |
| 11 | 62342517..62359649 | TUT1 | 2.335605 | 7.82E-09 | 40 | 204 | 3.480601 | 28 | 184 | 3.166243 | 34 | 209 | 3.070017 | 54 | 215 | 4.766446 | 80 | 320 | 5.407706 | 64 | 324 | 4.870486 |
| 15 | 89859534..89878092 | POLG | 2.335593 | 1.98E-51 | 869 | 921 | 11.60139 | 853 | 902 | 11.45933 | 898 | 941 | 10.20494 | 1325 | 1382 | 22.6199 | 1794 | 1877 | 23.41822 | 1997 | 2099 | 23.29518 |
| 1 | 19197926..19229275 | ALDH4A1 | 2.334837 | 8.13E-29 | 178 | 440 | 8.311448 | 146 | 388 | 7.391933 | 205 | 534 | 8.684315 | 279 | 616 | 15.11948 | 333 | 797 | 14.9115 | 413 | 963 | 16.02704 |
| 12 | 46751972..46766650 | SLC38A2 | 2.333051 | 1.01E-20 | 6270 | 6652 | 70.17361 | 8419 | 8850 | 94.16016 | 11592 | 12101 | 109.9039 | 13413 | 13881 | 190.2718 | 17710 | 18494 | 193.2375 | 19112 | 20033 | 186.1962 |
| 3 | 149086809..149095652 | TM4SF1 | 2.331985 | 1.91E-40 | 657 | 657 | 12.47479 | 684 | 684 | 13.09864 | 921 | 921 | 15.05559 | 1101 | 1101 | 27.16359 | 1650 | 1650 | 31.03064 | 1618 | 1618 | 27.06758 |
| 11 | 73723763..73882255 | C2CD3 | 2.33161 | 2.76E-36 | 195 | 196 | 1.086229 | 194 | 196 | 1.095529 | 237 | 238 | 1.135567 | 304 | 306 | 2.20353 | 434 | 436 | 2.393266 | 477 | 480 | 2.343742 |
| 21 | 30244513..30257693 | N6AMT1 | 2.330107 | 2.48E-23 | 98 | 100 | 1.431576 | 126 | 126 | 1.819228 | 123 | 123 | 1.515967 | 178 | 180 | 3.348258 | 243 | 243 | 3.445558 | 251 | 254 | 3.203695 |
| 9 | 140086069..140098645 | TPRN | 2.329435 | 1.13E-31 | 298 | 298 | 3.888077 | 249 | 249 | 3.276576 | 286 | 286 | 3.212587 | 425 | 425 | 7.205092 | 586 | 586 | 7.572777 | 606 | 606 | 6.966174 |
| 9 | 95883771..95896570 | NINJ1 | 2.327871 | 8.34E-39 | 638 | 638 | 16.7803 | 564 | 564 | 14.961 | 636 | 636 | 14.40146 | 907 | 907 | 30.99692 | 1227 | 1227 | 31.96412 | 1451 | 1451 | 33.62402 |
| 15 | 40617417..40618916 | LINC00984 | 2.324471 | 0.015212 | 5 | 5 | 0.586247 | 7 | 7 | 0.827773 | 10 | 10 | 1.009441 | 6 | 6 | 0.914101 | 18 | 18 | 2.090365 | 19 | 19 | 1.962761 |
| 9 | 91933421..91974557 | SECISBP2 | 2.323693 | 1.39E-54 | 361 | 361 | 2.567371 | 391 | 394 | 2.826051 | 448 | 449 | 2.749148 | 627 | 630 | 5.821756 | 787 | 790 | 5.564773 | 900 | 904 | 5.664387 |
| 17 | 79869815..79879199 | SIRT7 | 2.323281 | 8.31E-39 | 244 | 244 | 2.762299 | 221 | 221 | 2.523338 | 266 | 266 | 2.592584 | 364 | 364 | 5.354442 | 497 | 497 | 5.572835 | 553 | 553 | 5.515807 |
| X | 153172821..153200452 | ARHGAP4 | 2.321251 | 4.6E-06 | 26 | 31 | 0.386923 | 29 | 29 | 0.365059 | 20 | 23 | 0.24715 | 30 | 37 | 0.600063 | 45 | 54 | 0.667568 | 72 | 82 | 0.901737 |
| 7 | 77166592..77269388 | PTPN12 | 2.320568 | 2.53E-47 | 681 | 681 | 8.550393 | 826 | 826 | 10.45975 | 964 | 964 | 10.42045 | 1281 | 1281 | 20.89874 | 1605 | 1605 | 19.95965 | 1862 | 1862 | 20.59784 |
| 12 | 100967461..101022064 | GAS2L3 | 2.32022 | 7.68E-15 | 117 | 117 | 1.216572 | 157 | 157 | 1.646471 | 238 | 238 | 2.130587 | 247 | 247 | 3.337191 | 358 | 358 | 3.687007 | 373 | 373 | 3.417149 |
| 15 | 72766667..72879692 | ARIH1 | 2.319945 | 1.92E-41 | 613 | 954 | 9.169532 | 686 | 925 | 8.966911 | 925 | 1163 | 9.62385 | 1164 | 1438 | 17.95931 | 1441 | 1866 | 17.76435 | 1646 | 2055 | 17.40258 |
| 8 | 97251626..97273838 | MTERFD1 | 2.317806 | 5.96E-14 | 48 | 48 | 1.8562 | 49 | 49 | 1.911093 | 65 | 65 | 2.164049 | 83 | 83 | 4.170552 | 103 | 103 | 3.945115 | 126 | 126 | 4.292962 |
| 19 | 53300662..53360853 | ZNF28 | 2.316522 | 2.12E-09 | 33 | 34 | 0.396379 | 60 | 60 | 0.705481 | 89 | 91 | 0.913363 | 88 | 88 | 1.333051 | 120 | 122 | 1.40874 | 140 | 140 | 1.438014 |
| 3 | 141594966..141645356 | ATP1B3 | 2.31626 | 2.23E-64 | 699 | 702 | 18.9209 | 724 | 726 | 19.73529 | 947 | 950 | 22.04441 | 1230 | 1235 | 43.25175 | 1552 | 1562 | 41.6989 | 1757 | 1766 | 41.9371 |
| 9 | 125871779..126030855 | STRBP | 2.315842 | 5.07E-14 | 55 | 56 | 0.482398 | 63 | 63 | 0.547344 | 74 | 74 | 0.548806 | 94 | 94 | 1.052148 | 150 | 150 | 1.279815 | 125 | 125 | 0.948703 |
| 12 | 16500076..16762193 | MGST1 | 2.315838 | 2.32E-15 | 647 | 647 | 7.252706 | 903 | 903 | 10.20906 | 1312 | 1312 | 12.66193 | 1413 | 1413 | 20.58117 | 1843 | 1843 | 20.46257 | 2183 | 2183 | 21.56019 |
| X | 149737069..149841795 | MTM1 | 2.314604 | 2.51E-14 | 56 | 56 | 0.963484 | 80 | 80 | 1.38819 | 121 | 121 | 1.792307 | 134 | 134 | 2.995667 | 166 | 166 | 2.82881 | 190 | 190 | 2.880138 |
| 14 | 102547075..102606036 | HSP90AA1 | 2.314485 | 2.6E-116 | 5947 | 6588 | 87.42928 | 5975 | 6557 | 87.76287 | 7557 | 8262 | 94.39714 | 9934 | 10889 | 187.7688 | 13204 | 14449 | 189.9241 | 14197 | 15598 | 182.3792 |
| 14 | 101536248..101539274 | MEG9 | 2.313893 | 7.08E-07 | 27 | 27 | 0.71202 | 22 | 22 | 0.585132 | 23 | 23 | 0.522188 | 37 | 37 | 1.267834 | 42 | 42 | 1.097026 | 60 | 60 | 1.394065 |
| 2 | 242641450..242668893 | ING5 | 2.313411 | 5.29E-23 | 161 | 203 | 1.724167 | 141 | 166 | 1.421981 | 213 | 249 | 1.820761 | 232 | 279 | 3.07907 | 373 | 432 | 3.634176 | 387 | 456 | 3.412332 |
| 11 | 10533225..10562777 | RNF141 | 2.310412 | 1.4E-41 | 267 | 267 | 3.613588 | 270 | 271 | 3.699125 | 367 | 368 | 4.287908 | 473 | 474 | 8.335617 | 604 | 605 | 8.110016 | 649 | 649 | 7.738827 |
| 19 | 3538259..3574288 | MFSD12 | 2.309983 | 1.41E-57 | 398 | 794 | 13.85941 | 395 | 751 | 13.22107 | 469 | 865 | 12.99902 | 647 | 1177 | 26.69517 | 838 | 1527 | 26.3999 | 936 | 1689 | 25.97509 |
| 19 | 14625582..14640582 | DNAJB1 | 2.309983 | 3.31E-93 | 921 | 1138 | 21.58424 | 934 | 1168 | 22.3429 | 1174 | 1377 | 22.4853 | 1554 | 1803 | 44.4347 | 2026 | 2420 | 45.46203 | 2216 | 2617 | 43.7322 |
| 16 | 2802330..2822539 | SRRM2 | 2.30959 | 1.65E-52 | 6792 | 6793 | 35.66576 | 6448 | 6451 | 34.16011 | 7362 | 7363 | 33.28243 | 10159 | 10159 | 69.30633 | 13260 | 13261 | 68.96125 | 16450 | 16450 | 76.09549 |
| 16 | 87417601..87438385 | MAP1LC3B | 2.308516 | 2.22E-64 | 1394 | 1530 | 20.0562 | 1570 | 1697 | 22.4358 | 1881 | 2034 | 22.95507 | 2488 | 2728 | 46.46583 | 3114 | 3394 | 44.06646 | 3667 | 3935 | 45.44699 |
| 8 | 29920528..29940723 | TMEM66 | 2.308187 | 6E-34 | 723 | 894 | 20.83093 | 906 | 1027 | 24.13482 | 1130 | 1236 | 24.79477 | 1371 | 1482 | 44.86953 | 1807 | 1992 | 45.97265 | 2093 | 2307 | 47.36112 |
| 9 | 74966341..74980163 | ZFAND5 | 2.308109 | 2.41E-49 | 2322 | 2430 | 23.95473 | 2800 | 2916 | 28.99177 | 3328 | 3477 | 29.50937 | 4280 | 4418 | 56.5904 | 5577 | 5803 | 56.65999 | 6291 | 6519 | 56.6199 |
| 19 | 17337013..17340028 | OCEL1 | 2.306028 | 3.64E-32 | 216 | 216 | 8.057616 | 193 | 193 | 7.261268 | 230 | 230 | 7.386709 | 307 | 307 | 14.8807 | 425 | 425 | 15.70293 | 498 | 498 | 16.36761 |
| 4 | 108852525..108874613 | CYP2U1 | 2.304624 | 2.25E-16 | 77 | 343 | 3.918739 | 74 | 374 | 4.309492 | 113 | 518 | 5.095095 | 120 | 592 | 8.788322 | 166 | 764 | 8.645389 | 221 | 858 | 8.636595 |
| 6 | 21593972..21598847 | SOX4 | 2.303637 | 1.09E-31 | 2678 | 2678 | 38.25111 | 2557 | 2557 | 36.83549 | 2577 | 2577 | 31.6897 | 3895 | 3895 | 72.28912 | 5705 | 5705 | 80.71013 | 5464 | 5464 | 68.7618 |
| 4 | 123747863..123819391 | FGF2 | 2.300819 | 2.11E-18 | 369 | 773 | 7.946343 | 279 | 781 | 8.097318 | 298 | 893 | 7.903321 | 481 | 1383 | 18.4732 | 652 | 1939 | 19.74261 | 691 | 1882 | 17.04553 |

| 2 | 210886147..211036107 | KANSL1L | 2.299857 | 3.61E-24 | 128 | 129 | 1.060977 | 179 | 179 | 1.484813 | 196 | 196 | 1.38785 | 244 | 244 | 2.607583 | 335 | 336 | 2.737124 | 383 | 385 | 2.789845 |
| --- | --- | --- | --- | --- | --- | --- | --- | --- | --- | --- | --- | --- | --- | --- | --- | --- | --- | --- | --- | --- | --- | --- |
| 2 | 204259068..204400133 | RAPH1 | 2.299389 | 2.75E-25 | 144 | 397 | 2.364015 | 131 | 395 | 2.372243 | 180 | 573 | 2.937546 | 221 | 656 | 5.075697 | 332 | 949 | 5.597125 | 315 | 1023 | 5.367086 |
| 1 | 5922871..6052533 | NPHP4 | 2.298916 | 2.48E-23 | 188 | 192 | 1.015574 | 162 | 162 | 0.864227 | 164 | 168 | 0.76505 | 261 | 261 | 1.793837 | 357 | 358 | 1.875566 | 368 | 368 | 1.714989 |
| 17 | 73131343..73164376 | HN1 | 2.29821 | 1.84E-48 | 553 | 553 | 11.21885 | 562 | 562 | 11.49905 | 606 | 606 | 10.5844 | 833 | 833 | 21.95838 | 1158 | 1158 | 23.26863 | 1316 | 1316 | 23.52244 |
| 12 | 132379196..132407712 | ULK1 | 2.296419 | 3.23E-56 | 1051 | 1051 | 9.621202 | 968 | 968 | 8.937258 | 1118 | 1118 | 8.811275 | 1589 | 1589 | 18.9009 | 2025 | 2025 | 18.36076 | 2394 | 2394 | 19.30874 |
| 22 | 38597889..38612518 | MAFF | 2.295826 | 4.56E-31 | 673 | 687 | 16.07219 | 543 | 550 | 12.97727 | 642 | 651 | 13.11202 | 946 | 958 | 29.12164 | 1286 | 1301 | 30.14634 | 1323 | 1350 | 27.82628 |
| 13 | 45967451..45992590 | SLC25A30 | 2.295289 | 1.22E-16 | 89 | 89 | 0.91235 | 99 | 100 | 1.033889 | 159 | 159 | 1.403263 | 165 | 165 | 2.197797 | 217 | 217 | 2.203283 | 278 | 278 | 2.510843 |
| 3 | 9391373..9440263 | SETD5-AS1 | 2.292455 | 1.16E-16 | 77 | 77 | 0.854622 | 74 | 76 | 0.850745 | 73 | 75 | 0.716663 | 108 | 109 | 1.571962 | 157 | 157 | 1.725925 | 163 | 164 | 1.603727 |
| 1 | 231499497..231560790 | EGLN1 | 2.291451 | 1.44E-41 | 653 | 653 | 6.260005 | 584 | 586 | 5.665803 | 684 | 687 | 5.670072 | 924 | 928 | 11.55957 | 1350 | 1354 | 12.85639 | 1403 | 1404 | 11.85855 |
| 4 | 134070470..134129356 | PCDH10 | 2.289861 | 2.87E-36 | 219 | 219 | 1.784128 | 198 | 198 | 1.626857 | 264 | 264 | 1.851638 | 344 | 344 | 3.641433 | 464 | 464 | 3.744025 | 485 | 485 | 3.481182 |
| 17 | 79780287..79791178 | FAM195B | 2.289818 | 3.04E-33 | 426 | 1276 | 24.17532 | 354 | 1137 | 21.72623 | 411 | 1248 | 20.35666 | 595 | 1840 | 45.29722 | 816 | 2503 | 46.9701 | 864 | 2609 | 43.55107 |
| 12 | 50101508..50158717 | TMBIM6 | 2.287525 | 1.42E-34 | 3446 | 3446 | 38.79112 | 4011 | 4011 | 45.5378 | 5464 | 5464 | 52.95391 | 6480 | 6480 | 94.78161 | 8370 | 8370 | 93.32145 | 9486 | 9486 | 94.08129 |
| 12 | 46777462..46850051 | RP11-96H19.1 | 2.284052 | 0.010571 | 10 | 10 | 0.787852 | 8 | 8 | 0.635678 | 6 | 6 | 0.406974 | 11 | 11 | 1.126081 | 17 | 17 | 1.326578 | 18 | 18 | 1.249455 |
| 15 | 82944773..82974312 | RP11-152F13.7 | 2.283901 | 0.015524 | 15 | 27 | 1.093919 | 9 | 19 | 0.776385 | 2 | 6 | 0.209287 | 11 | 31 | 1.631981 | 21 | 47 | 1.886071 | 18 | 32 | 1.142285 |
| 1 | 169074935..169101960 | ATP1B1 | 2.282014 | 2.59E-37 | 212 | 214 | 4.857978 | 224 | 224 | 5.128521 | 276 | 277 | 5.413671 | 348 | 349 | 10.29436 | 489 | 491 | 11.03983 | 512 | 514 | 10.28035 |
| 6 | 41757634..41863099 | USP49 | 2.280724 | 7.79E-19 | 81 | 83 | 0.513423 | 87 | 88 | 0.549013 | 128 | 128 | 0.681675 | 153 | 153 | 1.229761 | 177 | 177 | 1.08445 | 229 | 229 | 1.248061 |
| 11 | 73018280..73020406 | RP11-800A3.7 | 2.278737 | 2.38E-08 | 37 | 51 | 2.095548 | 36 | 50 | 2.072048 | 26 | 33 | 1.167379 | 52 | 69 | 3.683906 | 69 | 101 | 4.110435 | 67 | 94 | 3.402972 |
| 3 | 99536678..99897447 | CMSS1 | 2.27825 | 1.6E-20 | 83 | 83 | 1.416474 | 100 | 100 | 1.721206 | 127 | 127 | 1.86597 | 163 | 163 | 3.614516 | 189 | 190 | 3.211612 | 233 | 233 | 3.503399 |
| 12 | 95470525..95611258 | FGD6 | 2.277063 | 2.32E-23 | 96 | 96 | 0.665674 | 106 | 106 | 0.741308 | 136 | 136 | 0.811895 | 173 | 173 | 1.558722 | 220 | 220 | 1.510957 | 245 | 245 | 1.496786 |
| 11 | 65657875..65659105 | CCDC85B | 2.276927 | 2.95E-22 | 3842 | 3842 | 217.3684 | 3148 | 3148 | 179.6289 | 3269 | 3269 | 159.2298 | 5203 | 5203 | 382.4943 | 7248 | 7248 | 406.1592 | 7113 | 7113 | 354.5643 |
| 1 | 35525387..35581460 | ZMYM1 | 2.275779 | 2.1E-19 | 73 | 73 | 1.053059 | 84 | 84 | 1.222113 | 110 | 110 | 1.366133 | 134 | 134 | 2.511694 | 174 | 174 | 2.486097 | 196 | 196 | 2.491088 |
| 6 | 52226219..52272575 | PAQR8 | 2.275005 | 1.17E-22 | 105 | 105 | 1.446084 | 102 | 102 | 1.416794 | 146 | 146 | 1.731121 | 190 | 190 | 3.400086 | 218 | 218 | 2.973717 | 256 | 256 | 3.106328 |
| 12 | 104656092..104674500 | RP11-818F20.5 | 2.274632 | 0.016923 | 2 | 20 | 1.987051 | 7 | 19 | 1.90386 | 12 | 27 | 2.309475 | 11 | 42 | 5.422012 | 14 | 50 | 4.920261 | 15 | 60 | 5.252106 |
| 15 | 20587869..20711433 | HERC2P3 | 2.274211 | 3.24E-13 | 50 | 104 | 1.151176 | 63 | 144 | 1.607582 | 79 | 194 | 1.84876 | 87 | 200 | 2.87654 | 117 | 263 | 2.883388 | 160 | 365 | 3.559626 |
| 16 | 68118654..68263162 | NFATC3 | 2.273139 | 8.4E-24 | 105 | 227 | 1.79533 | 125 | 250 | 1.994164 | 160 | 322 | 2.192525 | 190 | 368 | 3.781798 | 249 | 521 | 4.081268 | 297 | 588 | 4.097311 |
| 12 | 53458388..53473204 | SPRYD3 | 2.272021 | 4.88E-52 | 541 | 541 | 11.80776 | 493 | 493 | 10.85224 | 607 | 607 | 11.40589 | 856 | 856 | 24.27595 | 1057 | 1057 | 22.8499 | 1177 | 1177 | 22.63341 |
| 20 | 61038553..61051026 | GATA5 | 2.271512 | 3.86E-06 | 14 | 14 | 0.37574 | 23 | 23 | 0.622572 | 25 | 25 | 0.577657 | 36 | 36 | 1.255435 | 39 | 39 | 1.036725 | 42 | 42 | 0.993144 |
| 19 | 38042308..38104998 | ZNF540 | 2.269089 | 0.003514 | 8 | 8 | 0.147438 | 6 | 6 | 0.111525 | 13 | 13 | 0.206269 | 20 | 21 | 0.502888 | 15 | 15 | 0.273811 | 16 | 16 | 0.259803 |
| 17 | 4046462..4090605 | CYB5D2 | 2.268365 | 1.15E-42 | 359 | 359 | 11.45874 | 313 | 313 | 10.07602 | 389 | 389 | 10.68962 | 529 | 530 | 21.98115 | 688 | 689 | 21.78214 | 785 | 785 | 22.07573 |
| 4 | 176986985..177103978 | WDR17 | 2.268125 | 1.27E-07 | 19 | 19 | 0.169282 | 36 | 36 | 0.323491 | 36 | 36 | 0.27614 | 54 | 54 | 0.625148 | 51 | 51 | 0.450056 | 66 | 66 | 0.518089 |
| 3 | 48663156..48672926 | SLC26A6 | 2.26748 | 1.52E-26 | 199 | 199 | 2.174735 | 189 | 189 | 2.083135 | 187 | 187 | 1.759402 | 303 | 303 | 4.30257 | 366 | 366 | 3.961624 | 416 | 416 | 4.005435 |
| 17 | 62116502..62208179 | ERN1 | 2.266291 | 3.29E-24 | 158 | 158 | 1.012895 | 171 | 171 | 1.10562 | 171 | 171 | 0.943787 | 271 | 271 | 2.257401 | 296 | 296 | 1.879482 | 374 | 374 | 2.112429 |
| 7 | 77428122..77586818 | PHTF2 | 2.265962 | 3.73E-20 | 378 | 378 | 3.050196 | 484 | 484 | 3.938979 | 683 | 683 | 4.7449 | 736 | 736 | 7.716954 | 1017 | 1017 | 8.12823 | 1133 | 1133 | 8.055065 |
| 15 | 25068794..25223870 | SNRPN | 2.265222 | 0.000143 | 76 | 168 | 3.354517 | 45 | 93 | 1.872863 | 67 | 136 | 2.337921 | 62 | 113 | 2.931779 | 108 | 218 | 4.311378 | 198 | 375 | 6.59713 |
| 9 | 91926113..91931618 | CKS2 | 2.264101 | 3.74E-16 | 66 | 66 | 7.498607 | 99 | 99 | 11.34421 | 103 | 103 | 10.07498 | 147 | 147 | 21.70132 | 161 | 161 | 18.11764 | 194 | 194 | 19.41965 |
| 14 | 66974125..67648520 | GPHN | 2.261618 | 4.72E-20 | 83 | 104 | 1.205793 | 106 | 122 | 1.426598 | 110 | 130 | 1.297637 | 151 | 172 | 2.591194 | 187 | 229 | 2.629747 | 224 | 255 | 2.60485 |
| 1 | 67465015..67519782 | SLC35D1 | 2.260202 | 2.45E-15 | 164 | 164 | 1.596585 | 208 | 208 | 2.042273 | 322 | 322 | 2.698823 | 346 | 346 | 4.376797 | 432 | 432 | 4.165536 | 509 | 509 | 4.365853 |
| 2 | 200794698..200820459 | TYW5 | 2.259548 | 0.000109 | 18 | 38 | 0.252149 | 12 | 50 | 0.334615 | 18 | 69 | 0.394178 | 33 | 83 | 0.715622 | 25 | 95 | 0.624361 | 32 | 95 | 0.555393 |
| 16 | 56395364..56459450 | AMFR | 2.258639 | 1.88E-89 | 1292 | 1294 | 18.13687 | 1343 | 1343 | 18.98482 | 1624 | 1629 | 19.6571 | 2165 | 2165 | 39.42921 | 2836 | 2840 | 39.42625 | 2958 | 2964 | 36.60239 |
| 1 | 19401000..19536770 | UBR4 | 2.256628 | 3.6E-72 | 4572 | 4630 | 13.05777 | 4669 | 4720 | 13.42556 | 5682 | 5734 | 13.92246 | 7330 | 7395 | 27.09932 | 9591 | 9688 | 27.06208 | 11072 | 11183 | 27.7875 |
| 10 | 70883268..70932617 | VPS26A | 2.25182 | 5.21E-42 | 645 | 645 | 12.33776 | 737 | 737 | 14.21825 | 957 | 958 | 15.77656 | 1141 | 1142 | 28.38407 | 1522 | 1522 | 28.83567 | 1694 | 1694 | 28.54914 |
| 4 | 26859300..27027003 | STIM2 | 2.2507 | 3.22E-50 | 427 | 427 | 4.304372 | 465 | 465 | 4.727562 | 542 | 542 | 4.703829 | 683 | 683 | 8.94612 | 953 | 953 | 9.51511 | 1050 | 1050 | 9.325548 |
| 8 | 79428374..79517502 | PKIA | 2.249207 | 7.24E-24 | 112 | 116 | 1.91626 | 117 | 123 | 2.049293 | 156 | 159 | 2.26133 | 195 | 196 | 4.207118 | 235 | 236 | 3.861424 | 288 | 295 | 4.293601 |
| 17 | 26873725..26879686 | UNC119 | 2.249016 | 7.15E-17 | 79 | 241 | 3.273152 | 75 | 228 | 3.123103 | 79 | 250 | 2.923206 | 115 | 311 | 5.488347 | 155 | 409 | 5.501884 | 166 | 468 | 5.60013 |
| 19 | 11908482..11920437 | ZNF491 | 2.246987 | 3.26E-05 | 20 | 20 | 0.459407 | 20 | 20 | 0.46334 | 16 | 16 | 0.316416 | 29 | 29 | 0.865562 | 33 | 33 | 0.750794 | 43 | 43 | 0.870241 |
| 20 | 2844830..3019722 | PTPRA | 2.246614 | 1.16E-64 | 1307 | 1307 | 20.18796 | 1294 | 1295 | 20.17386 | 1512 | 1512 | 20.10662 | 1959 | 1959 | 39.31727 | 2642 | 2645 | 40.46519 | 3116 | 3121 | 42.47308 |
| 2 | 8806766..8821993 | AC011747.7 | 2.245488 | 0.042283 | 8 | 8 | 0.27047 | 6 | 6 | 0.20459 | 4 | 4 | 0.116429 | 9 | 9 | 0.395371 | 12 | 12 | 0.401837 | 13 | 13 | 0.387237 |
| 12 | 42475647..42538681 | GXYLT1 | 2.245358 | 1.46E-29 | 173 | 173 | 1.607147 | 208 | 208 | 1.948836 | 227 | 227 | 1.81554 | 322 | 322 | 3.886848 | 379 | 379 | 3.487288 | 429 | 429 | 3.511317 |
| 10 | 131864638..131909081 | LINC00959 | 2.245217 | 0.001073 | 6 | 6 | 0.146984 | 17 | 17 | 0.420021 | 15 | 15 | 0.31636 | 19 | 19 | 0.604792 | 33 | 33 | 0.800706 | 19 | 19 | 0.410088 |

| 11 | 27516123..27528320 | LIN7C | 2.245207 | 4.65E-19 | 146 | 146 | 2.169014 | 218 | 218 | 3.266392 | 251 | 251 | 3.210359 | 297 | 297 | 5.733213 | 410 | 410 | 6.032987 | 436 | 436 | 5.706885 |
| --- | --- | --- | --- | --- | --- | --- | --- | --- | --- | --- | --- | --- | --- | --- | --- | --- | --- | --- | --- | --- | --- | --- |
| 12 | 113633246..113658899 | IQCD | 2.245056 | 0.011949 | 10 | 10 | 0.283114 | 11 | 11 | 0.314092 | 7 | 7 | 0.17062 | 7 | 7 | 0.257509 | 27 | 27 | 0.75712 | 19 | 19 | 0.473935 |
| 4 | 1385340..1389780 | CRIPAK | 2.244577 | 1.78E-12 | 46 | 46 | 0.721397 | 66 | 66 | 1.043909 | 72 | 72 | 0.972118 | 102 | 102 | 2.078493 | 125 | 125 | 1.941625 | 114 | 114 | 1.575159 |
| 18 | 12661832..12702776 | CEP76 | 2.24303 | 3.98E-06 | 21 | 25 | 0.282747 | 20 | 33 | 0.376421 | 31 | 44 | 0.428431 | 26 | 32 | 0.470262 | 49 | 68 | 0.761738 | 60 | 75 | 0.747346 |
| 1 | 41481269..41488909 | SLFNL1 | 2.242852 | 0.009228 | 9 | 9 | 0.145433 | 10 | 10 | 0.162975 | 6 | 6 | 0.083472 | 12 | 12 | 0.251961 | 19 | 19 | 0.304097 | 16 | 16 | 0.227794 |
| X | 47092089..47107727 | USP11 | 2.240329 | 7.19E-55 | 860 | 860 | 11.36756 | 792 | 792 | 10.55836 | 1011 | 1011 | 11.5051 | 1269 | 1269 | 21.79529 | 1720 | 1720 | 22.51834 | 1980 | 1980 | 23.05883 |
| 1 | 28832455..28865812 | RCC1 | 2.239156 | 3.21E-29 | 432 | 432 | 7.738461 | 384 | 384 | 6.937523 | 460 | 460 | 7.094128 | 579 | 579 | 13.47664 | 919 | 919 | 16.30517 | 890 | 890 | 14.04637 |
| 14 | 50779044..50802276 | ATP5S | 2.238373 | 2.17E-08 | 70 | 79 | 1.50165 | 50 | 58 | 1.111916 | 85 | 95 | 1.554661 | 91 | 110 | 2.716855 | 170 | 182 | 3.42651 | 119 | 136 | 2.277633 |
| 20 | 62189439..62205592 | HELZ2 | 2.237002 | 2.37E-31 | 1081 | 1081 | 6.23964 | 920 | 920 | 5.355795 | 1035 | 1035 | 5.143331 | 1556 | 1556 | 11.67012 | 2033 | 2034 | 11.6285 | 2059 | 2059 | 10.47112 |
| 16 | 3355406..3368852 | ZNF75A | 2.236384 | 1.24E-22 | 113 | 113 | 1.65406 | 103 | 103 | 1.52059 | 142 | 144 | 1.814703 | 182 | 185 | 3.518653 | 218 | 220 | 3.189586 | 264 | 266 | 3.4305 |
| 14 | 71189243..71276251 | MAP3K9 | 2.236322 | 6.19E-05 | 19 | 19 | 0.106837 | 21 | 21 | 0.119093 | 14 | 14 | 0.067774 | 24 | 24 | 0.175351 | 34 | 34 | 0.189358 | 43 | 43 | 0.213028 |
| 12 | 132312938..132336328 | MMP17 | 2.234608 | 7.32E-21 | 400 | 400 | 6.959396 | 337 | 337 | 5.913489 | 344 | 344 | 5.152765 | 519 | 519 | 11.73305 | 678 | 678 | 11.6837 | 835 | 835 | 12.79974 |
| 9 | 131709978..131769375 | NUP188 | 2.234158 | 7.3E-64 | 794 | 797 | 6.903119 | 835 | 840 | 7.337847 | 1044 | 1051 | 7.837185 | 1305 | 1313 | 14.77692 | 1681 | 1689 | 14.48958 | 1970 | 1978 | 15.09442 |
| 14 | 24608174..24610797 | EMC9 | 2.233566 | 1.6E-10 | 39 | 42 | 2.166769 | 41 | 41 | 2.133288 | 51 | 52 | 2.309601 | 64 | 66 | 4.424247 | 93 | 96 | 4.90539 | 86 | 94 | 4.272621 |
| 6 | 46620678..46645930 | SLC25A27 | 2.23029 | 1.01E-09 | 37 | 50 | 1.034554 | 54 | 72 | 1.502512 | 46 | 72 | 1.282584 | 77 | 112 | 3.011155 | 93 | 122 | 2.500241 | 83 | 126 | 2.296977 |
| 19 | 53627325..53662328 | ZNF347 | 2.226679 | 5.68E-15 | 61 | 62 | 0.805008 | 94 | 94 | 1.230945 | 107 | 107 | 1.196086 | 140 | 140 | 2.361938 | 156 | 157 | 2.01905 | 186 | 186 | 2.127769 |
| 17 | 7476024..7482323 | EIF4A1 | 2.2265 | 4.54E-62 | 2621 | 5858 | 84.82062 | 2752 | 6163 | 90.00084 | 3605 | 7879 | 98.21854 | 4334 | 9772 | 183.8517 | 5692 | 12948 | 185.6922 | 6530 | 14746 | 188.1176 |
| 12 | 53551447..53575135 | CSAD | 2.226038 | 8.02E-17 | 165 | 167 | 2.397137 | 127 | 134 | 1.939918 | 160 | 167 | 2.063779 | 192 | 195 | 3.636998 | 323 | 331 | 4.705907 | 329 | 341 | 4.312547 |
| 6 | 79645584..79787953 | PHIP | 2.225351 | 1.96E-28 | 405 | 615 | 3.232145 | 469 | 715 | 3.789868 | 656 | 980 | 4.434168 | 770 | 1154 | 7.880496 | 966 | 1397 | 7.271954 | 1062 | 1573 | 7.283624 |
| 1 | 145575233..145586546 | PIAS3 | 2.225105 | 4.35E-38 | 382 | 411 | 5.957246 | 399 | 421 | 6.154435 | 539 | 588 | 7.337555 | 638 | 672 | 12.65625 | 808 | 870 | 12.48999 | 989 | 1052 | 13.43453 |
| 1 | 44171495..44396831 | ST3GAL3 | 2.223268 | 8.48E-27 | 199 | 200 | 3.147849 | 197 | 203 | 3.222421 | 220 | 224 | 3.035304 | 290 | 293 | 5.992162 | 372 | 378 | 5.892704 | 482 | 491 | 6.808767 |
| 12 | 123773656..123849390 | SBNO1 | 2.223107 | 1.82E-31 | 522 | 534 | 3.343316 | 655 | 675 | 4.262283 | 787 | 804 | 4.333737 | 1020 | 1030 | 8.379256 | 1234 | 1254 | 7.776294 | 1337 | 1362 | 7.513052 |
| 14 | 34901995..34931562 | SPTSSA | 2.220927 | 6.3E-14 | 55 | 162 | 4.062901 | 57 | 197 | 4.982988 | 94 | 298 | 6.434397 | 108 | 342 | 11.14498 | 124 | 437 | 10.8553 | 146 | 482 | 10.65053 |
| 15 | 68483043..68498417 | CALML4 | 2.220595 | 2.97E-08 | 23 | 36 | 0.500751 | 34 | 53 | 0.743529 | 40 | 57 | 0.682598 | 47 | 67 | 1.210951 | 65 | 94 | 1.29505 | 67 | 100 | 1.225526 |
| 19 | 1259384..1274879 | CIRBP | 2.219214 | 8.31E-47 | 1943 | 1943 | 19.64042 | 1820 | 1820 | 18.5546 | 2010 | 2010 | 17.49219 | 2813 | 2813 | 36.94704 | 3855 | 3855 | 38.59591 | 4018 | 4018 | 35.78417 |
| 15 | 45694529..45713617 | SPATA5L1 | 2.219192 | 5.47E-25 | 129 | 129 | 2.637802 | 141 | 141 | 2.907863 | 153 | 153 | 2.693483 | 205 | 205 | 5.446762 | 284 | 284 | 5.75188 | 291 | 291 | 5.242623 |
| 15 | 78423840..78464291 | IDH3A | 2.218606 | 9.22E-32 | 200 | 256 | 2.609692 | 224 | 313 | 3.218073 | 273 | 376 | 3.299951 | 350 | 466 | 6.172587 | 464 | 612 | 6.179306 | 465 | 628 | 5.640428 |
| 12 | 88427623..88443937 | C12orf29 | 2.217615 | 5.6E-19 | 82 | 89 | 0.960413 | 92 | 99 | 1.077471 | 107 | 131 | 1.217054 | 135 | 155 | 2.173361 | 176 | 196 | 2.0949 | 207 | 240 | 2.281826 |
| 9 | 20341663..20622542 | MLLT3 | 2.216793 | 5.22E-35 | 258 | 258 | 2.210445 | 291 | 291 | 2.514521 | 326 | 326 | 2.404628 | 406 | 406 | 4.519788 | 557 | 557 | 4.726658 | 654 | 654 | 4.936747 |
| 11 | 62554887..62557877 | TMEM179B | 2.215864 | 4.39E-17 | 86 | 183 | 8.519549 | 122 | 232 | 10.89321 | 145 | 267 | 10.70156 | 156 | 259 | 15.66742 | 232 | 388 | 17.89107 | 263 | 473 | 19.40125 |
| 12 | 58131796..58143994 | TSPAN31 | 2.215824 | 1.07E-18 | 147 | 176 | 2.276272 | 171 | 195 | 2.543597 | 236 | 262 | 2.917313 | 250 | 288 | 4.839895 | 399 | 447 | 5.726087 | 367 | 404 | 4.603582 |
| 5 | 73923234..73937249 | ENC1 | 2.215605 | 4.05E-18 | 173 | 192 | 2.28387 | 206 | 232 | 2.783303 | 311 | 333 | 3.410239 | 352 | 386 | 5.966087 | 414 | 457 | 5.384253 | 488 | 528 | 5.533594 |
| 10 | 72164135..72188374 | EIF4EBP2 | 2.215274 | 3.86E-28 | 980 | 990 | 9.501129 | 1128 | 1136 | 10.99564 | 1598 | 1606 | 13.26954 | 1780 | 1791 | 22.33406 | 2335 | 2357 | 22.40467 | 2646 | 2670 | 22.57638 |
| 1 | 23410516..23504301 | LUZP1 | 2.214729 | 3.22E-70 | 774 | 1029 | 7.35865 | 797 | 1066 | 7.688512 | 919 | 1351 | 8.317799 | 1207 | 1695 | 15.75014 | 1597 | 2261 | 16.01483 | 1782 | 2466 | 15.53742 |
| 22 | 21356175..21364631 | THAP7-AS1 | 2.214464 | 3.39E-07 | 36 | 46 | 1.076882 | 32 | 36 | 0.849992 | 25 | 35 | 0.705421 | 42 | 69 | 2.098898 | 67 | 98 | 2.27235 | 63 | 87 | 1.794455 |
| 8 | 95891998..95908906 | CCNE2 | 2.212863 | 0.013626 | 15 | 18 | 0.284981 | 2 | 7 | 0.111775 | 9 | 15 | 0.204458 | 17 | 23 | 0.473155 | 16 | 19 | 0.297945 | 15 | 18 | 0.251084 |
| 10 | 102288829..102319755 | HIF1AN | 2.212135 | 1.98E-35 | 580 | 580 | 2.895682 | 737 | 738 | 3.71605 | 832 | 832 | 3.576157 | 1049 | 1049 | 6.805037 | 1349 | 1349 | 6.670738 | 1543 | 1543 | 6.787221 |
| 14 | 24908972..24912111 | SDR39U1 | 2.212131 | 3.92E-24 | 132 | 287 | 6.449966 | 138 | 298 | 6.754515 | 143 | 294 | 5.68844 | 205 | 391 | 11.41785 | 255 | 462 | 10.28387 | 300 | 535 | 10.59333 |
| 22 | 35695268..35743985 | TOM1 | 2.211742 | 1.55E-41 | 1000 | 1000 | 11.86678 | 909 | 909 | 10.87926 | 1005 | 1005 | 10.26761 | 1409 | 1409 | 21.72581 | 1885 | 1885 | 22.15559 | 2090 | 2090 | 21.85156 |
| 4 | 128982423..129144086 | LARP1B | 2.211693 | 1.16E-27 | 154 | 154 | 1.219917 | 155 | 155 | 1.23835 | 174 | 174 | 1.186667 | 244 | 244 | 2.511489 | 300 | 300 | 2.353801 | 343 | 344 | 2.400883 |
| 1 | 91966408..91991321 | CDC7 | 2.210933 | 7.85E-09 | 30 | 30 | 0.580546 | 30 | 30 | 0.585516 | 48 | 48 | 0.7997 | 57 | 57 | 1.433251 | 65 | 65 | 1.245855 | 76 | 76 | 1.295782 |
| 16 | 30709030..30710379 | RP11-146F11.1 | 2.209047 | 0.045474 | 12 | 36 | 2.187837 | 7 | 25 | 1.532339 | 3 | 15 | 0.784827 | 7 | 13 | 1.026568 | 14 | 27 | 1.625232 | 20 | 52 | 2.784319 |
| 1 | 212113741..212208884 | INTS7 | 2.206498 | 1.74E-18 | 104 | 104 | 1.418289 | 133 | 133 | 1.829301 | 186 | 186 | 2.183808 | 212 | 213 | 3.774357 | 254 | 255 | 3.444375 | 304 | 306 | 3.67668 |
| X | 153665266..153671814 | GDI1 | 2.204636 | 1.12E-56 | 1341 | 1341 | 17.79301 | 1301 | 1301 | 17.41006 | 1522 | 1522 | 17.38623 | 1978 | 1978 | 34.10193 | 2582 | 2582 | 33.93249 | 3102 | 3102 | 36.26315 |
| 16 | 765115..769655 | METRN | 2.20461 | 2.66E-26 | 665 | 665 | 12.54461 | 592 | 592 | 11.26314 | 615 | 615 | 9.988054 | 895 | 895 | 21.93767 | 1283 | 1283 | 23.97182 | 1275 | 1275 | 21.19087 |
| 15 | 34432875..34502297 | KATNBL1 | 2.203657 | 1.02E-18 | 107 | 119 | 1.410225 | 129 | 140 | 1.673292 | 177 | 189 | 1.928295 | 218 | 230 | 3.541615 | 266 | 287 | 3.3687 | 264 | 288 | 3.007025 |
| 4 | 88081255..88161466 | KLHL8 | 2.199862 | 4.24E-28 | 148 | 148 | 1.401636 | 162 | 162 | 1.547358 | 188 | 189 | 1.541011 | 241 | 241 | 2.965669 | 312 | 313 | 2.936005 | 357 | 357 | 2.978824 |
| 17 | 1421012..1466110 | PITPNA | 2.199032 | 1.61E-51 | 931 | 932 | 13.56819 | 979 | 994 | 14.59468 | 1050 | 1058 | 13.26056 | 1388 | 1402 | 26.52076 | 1917 | 1928 | 27.80046 | 2132 | 2140 | 27.44877 |
| 6 | 99872798..99879249 | RP11-98I9.4 | 2.19837 | 0.03161 | 5 | 8 | 0.340152 | 3 | 10 | 0.42883 | 11 | 15 | 0.549092 | 11 | 19 | 1.049709 | 9 | 12 | 0.505363 | 15 | 23 | 0.861617 |

| 11 | 128834955..129149219 | ARHGAP32 | 2.19833 | 6.11E-29 | 227 | 227 | 1.231187 | 195 | 195 | 1.066683 | 291 | 291 | 1.358819 | 360 | 360 | 2.537072 | 440 | 440 | 2.363687 | 495 | 495 | 2.365411 |
| --- | --- | --- | --- | --- | --- | --- | --- | --- | --- | --- | --- | --- | --- | --- | --- | --- | --- | --- | --- | --- | --- | --- |
| 22 | 20004537..20053449 | TANGO2 | 2.19706 | 2.3E-28 | 251 | 435 | 4.920591 | 242 | 452 | 5.156663 | 259 | 513 | 4.995922 | 340 | 629 | 9.24508 | 480 | 926 | 10.37476 | 563 | 1062 | 10.58414 |
| 22 | 42951229..42978044 | RRP7B | 2.19552 | 6.37E-09 | 33 | 87 | 1.189948 | 46 | 79 | 1.089778 | 39 | 82 | 0.96559 | 65 | 124 | 2.203751 | 74 | 172 | 2.330109 | 76 | 163 | 1.964262 |
| 18 | 21269407..21535030 | LAMA3 | 2.194988 | 2.71E-33 | 239 | 239 | 1.230989 | 220 | 220 | 1.142829 | 262 | 262 | 1.161791 | 352 | 352 | 2.355759 | 442 | 442 | 2.254849 | 522 | 522 | 2.368808 |
| 5 | 167975500..168006605 | PANK3 | 2.194827 | 5.58E-24 | 736 | 821 | 5.404489 | 933 | 1041 | 6.911376 | 1187 | 1357 | 7.690625 | 1480 | 1664 | 14.23301 | 1805 | 1996 | 13.01401 | 1841 | 2011 | 11.66344 |
| 11 | 77300436..77321400 | AQP11 | 2.194568 | 0.005018 | 8 | 81 | 2.354482 | 7 | 82 | 2.403956 | 15 | 84 | 2.102132 | 14 | 59 | 2.228406 | 19 | 97 | 2.792679 | 22 | 102 | 2.612243 |
| 16 | 67471917..67515140 | ATP6V0D1 | 2.19412 | 3.86E-53 | 1209 | 1209 | 10.25356 | 1118 | 1118 | 9.562959 | 1417 | 1417 | 10.34638 | 1766 | 1766 | 19.46126 | 2312 | 2312 | 19.42115 | 2765 | 2765 | 20.66077 |
| X | 103077252..103087158 | RAB9B | 2.193801 | 0.002072 | 13 | 13 | 0.241569 | 11 | 11 | 0.206154 | 12 | 12 | 0.191977 | 16 | 16 | 0.386322 | 26 | 26 | 0.478531 | 24 | 24 | 0.392927 |
| 5 | 95049226..95160087 | RHOBTB3 | 2.191962 | 1.38E-43 | 1053 | 3100 | 24.44278 | 1152 | 3469 | 27.58643 | 1518 | 4150 | 28.17133 | 1861 | 5014 | 51.36949 | 2277 | 6275 | 49.00514 | 2584 | 6801 | 47.24597 |
| 14 | 45605143..45670093 | FANCM | 2.191726 | 1.75E-08 | 32 | 32 | 0.263188 | 37 | 37 | 0.306917 | 43 | 43 | 0.304477 | 59 | 59 | 0.630522 | 58 | 58 | 0.47248 | 87 | 87 | 0.630433 |
| 2 | 148687968..148779147 | ORC4 | 2.190912 | 1.16E-18 | 116 | 117 | 0.903593 | 110 | 113 | 0.880172 | 177 | 183 | 1.21677 | 211 | 211 | 2.117393 | 235 | 240 | 1.83585 | 281 | 285 | 1.939255 |
| 19 | 41807492..41859816 | TGFB1 | 2.190221 | 3.59E-79 | 1158 | 2954 | 63.5376 | 1209 | 2738 | 59.39584 | 1403 | 2962 | 54.84988 | 1800 | 3875 | 108.2989 | 2351 | 5286 | 112.6125 | 2720 | 5956 | 112.8699 |
| 10 | 60144782..60158981 | TFAM | 2.188064 | 4.75E-24 | 158 | 159 | 1.975337 | 206 | 206 | 2.581152 | 228 | 230 | 2.46004 | 296 | 297 | 4.794381 | 388 | 388 | 4.774355 | 387 | 387 | 4.236021 |
| 2 | 203499901..203634480 | FAM117B | 2.187467 | 9.45E-12 | 52 | 52 | 0.604003 | 91 | 91 | 1.066054 | 80 | 80 | 0.800011 | 100 | 100 | 1.509272 | 144 | 145 | 1.668178 | 163 | 163 | 1.668116 |
| 1 | 27153201..27184093 | ZDHHC18 | 2.186491 | 3.49E-36 | 329 | 329 | 4.215155 | 329 | 329 | 4.251243 | 397 | 397 | 4.379036 | 469 | 469 | 7.80769 | 676 | 676 | 8.578342 | 781 | 781 | 8.816005 |
| 3 | 57994127..58157982 | FLNB | 2.185237 | 3.05E-44 | 2266 | 2292 | 11.43802 | 1987 | 1999 | 10.06123 | 2354 | 2389 | 10.26414 | 3178 | 3208 | 20.80188 | 4126 | 4170 | 20.61158 | 4742 | 4775 | 20.99484 |
| X | 114238538..114254540 | IL13RA2 | 2.184325 | 0.001022 | 6 | 6 | 0.256997 | 18 | 18 | 0.777591 | 15 | 15 | 0.553144 | 20 | 20 | 1.113111 | 27 | 27 | 1.145458 | 24 | 24 | 0.905714 |
| 15 | 65385338..65407535 | UBAP1L | 2.184092 | 4.89E-06 | 22 | 22 | 0.184471 | 25 | 25 | 0.211421 | 25 | 25 | 0.180474 | 33 | 33 | 0.359543 | 50 | 50 | 0.415254 | 48 | 48 | 0.354609 |
| 5 | 154266976..154317769 | GEMIN5 | 2.183392 | 1.24E-32 | 203 | 203 | 2.508102 | 205 | 205 | 2.554496 | 275 | 275 | 2.925177 | 333 | 333 | 5.345956 | 428 | 428 | 5.237594 | 474 | 474 | 5.159773 |
| 19 | 5993175..6199583 | RFX2 | 2.182857 | 1.12E-13 | 78 | 147 | 1.125796 | 66 | 141 | 1.08909 | 66 | 130 | 0.857148 | 100 | 164 | 1.631992 | 136 | 230 | 1.744653 | 146 | 270 | 1.821835 |
| 1 | 156163880..156182587 | SLC25A44 | 2.182754 | 9.48E-38 | 331 | 331 | 3.241406 | 307 | 307 | 3.032118 | 375 | 375 | 3.1616 | 472 | 472 | 6.005919 | 675 | 675 | 6.547088 | 692 | 692 | 5.970554 |
| 17 | 43971748..44105700 | MAPT | 2.182661 | 3.97E-05 | 27 | 27 | 0.149884 | 13 | 14 | 0.078383 | 22 | 23 | 0.109923 | 26 | 26 | 0.187541 | 41 | 43 | 0.236428 | 46 | 47 | 0.229876 |
| 14 | 70078313..70181859 | KIAA0247 | 2.181221 | 5.6E-42 | 379 | 379 | 4.527597 | 363 | 363 | 4.373585 | 466 | 466 | 4.792751 | 612 | 612 | 9.499747 | 762 | 762 | 9.016179 | 803 | 803 | 8.451762 |
| 16 | 238968..279462 | LUC7L | 2.17964 | 5.29E-42 | 450 | 450 | 5.074606 | 441 | 441 | 5.015691 | 504 | 504 | 4.893175 | 643 | 643 | 9.421778 | 927 | 927 | 10.35401 | 964 | 964 | 9.577893 |
| 10 | 112257596..112271302 | DUSP5 | 2.178738 | 5.68E-29 | 296 | 297 | 7.910098 | 349 | 350 | 9.401471 | 456 | 456 | 10.45588 | 518 | 518 | 17.92616 | 728 | 729 | 19.23056 | 736 | 737 | 17.29402 |
| 12 | 112597992..112819896 | HECTD4 | 2.176301 | 5.81E-57 | 924 | 924 | 3.031946 | 962 | 962 | 3.183661 | 1170 | 1170 | 3.30526 | 1453 | 1453 | 6.195083 | 1849 | 1849 | 6.00932 | 2226 | 2226 | 6.435432 |
| 10 | 13652047..13710299 | RP11-295P9.3 | 2.173848 | 0.012414 | 8 | 40 | 0.370853 | 8 | 35 | 0.327274 | 11 | 61 | 0.486902 | 16 | 46 | 0.554155 | 18 | 60 | 0.550975 | 15 | 59 | 0.481944 |
| 16 | 16043434..16236931 | ABCC1 | 2.173502 | 2.44E-68 | 3357 | 3357 | 30.86497 | 3223 | 3223 | 29.88664 | 3969 | 3969 | 31.41709 | 4822 | 4822 | 57.6068 | 6735 | 6735 | 61.33256 | 7570 | 7570 | 61.3216 |
| 2 | 224616403..224702744 | AP1S3 | 2.173227 | 0.000692 | 11 | 11 | 0.17883 | 9 | 9 | 0.147568 | 22 | 22 | 0.307922 | 17 | 17 | 0.359111 | 34 | 34 | 0.547477 | 25 | 25 | 0.358089 |
| 19 | 15490859..15529952 | AKAP8L | 2.169598 | 4.28E-32 | 455 | 561 | 7.689725 | 380 | 477 | 6.594299 | 464 | 553 | 6.525945 | 605 | 688 | 12.25373 | 809 | 975 | 13.23706 | 939 | 1092 | 13.18784 |
| 11 | 747329..765024 | TALDO1 | 2.169472 | 1.4E-64 | 1749 | 1749 | 40.53615 | 1602 | 1602 | 37.44704 | 2033 | 2033 | 40.56583 | 2574 | 2574 | 77.51634 | 3318 | 3318 | 76.16721 | 3813 | 3813 | 77.86147 |
| 9 | 116075502..116102578 | WDR31 | 2.169256 | 1.35E-13 | 60 | 60 | 0.847105 | 66 | 66 | 0.939793 | 75 | 75 | 0.911628 | 108 | 108 | 1.981262 | 124 | 124 | 1.73399 | 129 | 130 | 1.617084 |
| 19 | 53935227..53961515 | ZNF761 | 2.16921 | 3.49E-14 | 72 | 73 | 1.053714 | 91 | 95 | 1.383011 | 136 | 136 | 1.690087 | 156 | 159 | 2.982147 | 179 | 181 | 2.587721 | 198 | 199 | 2.530789 |
| 1 | 39325672..39385068 | RP5-864K19.4 | 2.168755 | 0.002191 | 12 | 22 | 1.569893 | 14 | 17 | 1.223485 | 38 | 44 | 2.703151 | 32 | 41 | 3.801572 | 27 | 35 | 2.473742 | 55 | 62 | 3.898003 |
| 1 | 93727743..93811582 | RP4-717I23.3 | 2.168167 | 1.48E-11 | 63 | 63 | 0.91678 | 66 | 66 | 0.968658 | 52 | 55 | 0.689061 | 90 | 90 | 1.701763 | 113 | 113 | 1.628703 | 124 | 124 | 1.589825 |
| 19 | 19868175..19887232 | LINC00663 | 2.167141 | 0.012935 | 14 | 15 | 0.555983 | 6 | 8 | 0.299063 | 7 | 7 | 0.223377 | 13 | 13 | 0.626103 | 19 | 19 | 0.69753 | 17 | 17 | 0.555165 |
| 2 | 175296966..175351822 | GPR155 | 2.166817 | 7.4E-12 | 46 | 46 | 0.451102 | 69 | 70 | 0.692336 | 83 | 84 | 0.709196 | 95 | 95 | 1.21052 | 136 | 136 | 1.320974 | 124 | 125 | 1.080015 |
| 3 | 52232102..52248343 | ALAS1 | 2.165903 | 1.84E-40 | 604 | 604 | 16.58765 | 529 | 529 | 14.6523 | 691 | 691 | 16.3379 | 833 | 833 | 29.72521 | 1151 | 1151 | 31.3085 | 1308 | 1308 | 31.64891 |
| 1 | 204391756..204463852 | PIK3C2B | 2.164561 | 3.04E-07 | 35 | 44 | 0.325518 | 27 | 36 | 0.268613 | 42 | 48 | 0.305728 | 38 | 54 | 0.519097 | 75 | 91 | 0.666812 | 75 | 93 | 0.60619 |
| 2 | 120124497..120130126 | DBI | 2.163662 | 6.11E-65 | 1565 | 1565 | 43.61594 | 1458 | 1458 | 40.98177 | 1742 | 1742 | 41.79741 | 2260 | 2260 | 81.84108 | 2981 | 2981 | 82.28712 | 3342 | 3342 | 82.06169 |
| 8 | 146198975..146228281 | ZNF252P | 2.163075 | 6.72E-26 | 176 | 189 | 1.438907 | 200 | 206 | 1.58176 | 266 | 270 | 1.769722 | 303 | 309 | 3.056761 | 382 | 388 | 2.92578 | 466 | 473 | 3.172745 |
| 19 | 37205285..37263727 | ZNF850 | 2.162353 | 0.005884 | 8 | 9 | 0.07992 | 8 | 8 | 0.071649 | 15 | 16 | 0.122322 | 13 | 13 | 0.15 | 22 | 22 | 0.193498 | 21 | 21 | 0.1643 |
| 9 | 139098179..139137687 | QSOX2 | 2.162185 | 3.54E-24 | 246 | 246 | 3.782109 | 309 | 309 | 4.79137 | 289 | 289 | 3.825314 | 418 | 419 | 8.370377 | 499 | 499 | 7.598685 | 602 | 602 | 8.154523 |
| 11 | 69467844..69490184 | ORAOV1 | 2.160975 | 5.88E-30 | 186 | 187 | 1.65424 | 191 | 194 | 1.730856 | 250 | 250 | 1.904001 | 312 | 314 | 3.609264 | 382 | 386 | 3.382075 | 427 | 431 | 3.359211 |
| 1 | 109472130..109506111 | CLCC1 | 2.160641 | 3.18E-22 | 135 | 351 | 4.893074 | 168 | 368 | 5.173981 | 199 | 420 | 5.04074 | 236 | 436 | 7.897566 | 294 | 561 | 7.745983 | 371 | 678 | 8.327363 |
| 12 | 53835525..53874946 | PCBP2 | 2.159984 | 1.07E-61 | 3807 | 5108 | 42.35149 | 4088 | 5474 | 45.77464 | 5218 | 6922 | 49.41056 | 6172 | 8261 | 88.99847 | 8066 | 10691 | 87.79609 | 9221 | 12335 | 90.10733 |
| 5 | 72921983..73237818 | ARHGEF28 | 2.159073 | 5.41E-35 | 328 | 328 | 1.462761 | 285 | 285 | 1.281878 | 355 | 355 | 1.363007 | 466 | 466 | 2.700334 | 592 | 592 | 2.614931 | 679 | 679 | 2.667918 |
| 17 | 74385532..74449288 | UBE2O | 2.158987 | 2.34E-31 | 528 | 528 | 5.681886 | 453 | 453 | 4.916535 | 528 | 528 | 4.891734 | 701 | 701 | 9.801865 | 994 | 994 | 10.59459 | 1023 | 1023 | 9.699233 |
| 3 | 48885005..48889414 | PRKAR2A-AS1 | 2.156922 | 0.001788 | 17 | 21 | 0.37339 | 6 | 11 | 0.19726 | 17 | 17 | 0.260233 | 20 | 22 | 0.508274 | 19 | 21 | 0.36983 | 33 | 37 | 0.579627 |

| 3 | 25760435..25831530 | NGLY1 | 2.155164 | 4.26E-23 | 157 | 171 | 1.430398 | 202 | 213 | 1.796978 | 250 | 259 | 1.865223 | 302 | 312 | 3.391153 | 376 | 398 | 3.297485 | 405 | 434 | 3.198553 |
| --- | --- | --- | --- | --- | --- | --- | --- | --- | --- | --- | --- | --- | --- | --- | --- | --- | --- | --- | --- | --- | --- | --- |
| 7 | 19060614..19157295 | TWIST1 | 2.154419 | 3.4E-22 | 432 | 432 | 14.79938 | 409 | 409 | 14.13141 | 383 | 383 | 11.29611 | 582 | 582 | 25.90686 | 758 | 758 | 25.71982 | 872 | 872 | 26.3196 |
| 12 | 57610578..57620232 | NXPH4 | 2.153619 | 0.008001 | 12 | 12 | 0.388723 | 4 | 4 | 0.130684 | 14 | 14 | 0.390442 | 15 | 15 | 0.631367 | 13 | 13 | 0.417101 | 26 | 26 | 0.742053 |
| 20 | 24943561..24973615 | APMAP | 2.153044 | 6.86E-69 | 1056 | 1056 | 29.96998 | 1130 | 1130 | 32.34472 | 1363 | 1363 | 33.30341 | 1677 | 1677 | 61.84259 | 2233 | 2233 | 62.76973 | 2427 | 2427 | 60.68697 |
| 17 | 79858841..79869340 | PCYT2 | 2.149851 | 3.86E-48 | 1714 | 1994 | 20.13548 | 1605 | 1856 | 18.90241 | 1821 | 2039 | 17.72656 | 2375 | 2828 | 37.10636 | 3289 | 3879 | 38.79678 | 3565 | 4191 | 37.28702 |
| 14 | 23516271..23526747 | CDH24 | 2.149206 | 5.16E-20 | 144 | 144 | 2.675839 | 169 | 169 | 3.167281 | 164 | 164 | 2.623685 | 233 | 233 | 5.625816 | 268 | 268 | 4.932548 | 353 | 353 | 5.779302 |
| 2 | 26987152..27004099 | SLC35F6 | 2.148833 | 8.18E-24 | 159 | 579 | 10.33448 | 169 | 624 | 11.23303 | 227 | 814 | 12.50848 | 263 | 813 | 18.85526 | 369 | 1146 | 20.25972 | 354 | 1278 | 20.09758 |
| 2 | 46808076..46844258 | PIGF | 2.148791 | 3.41E-12 | 53 | 81 | 1.133254 | 51 | 86 | 1.213509 | 78 | 141 | 1.698368 | 81 | 116 | 2.108785 | 111 | 178 | 2.466614 | 133 | 202 | 2.489985 |
| 1 | 94883933..94984222 | ABCD3 | 2.14822 | 5.7E-18 | 231 | 231 | 2.09783 | 309 | 309 | 2.830213 | 381 | 381 | 2.978885 | 458 | 458 | 5.404505 | 601 | 601 | 5.405948 | 564 | 564 | 4.512743 |
| 14 | 52897308..53019240 | TXNDC16 | 2.147899 | 2.31E-12 | 115 | 115 | 1.690084 | 104 | 104 | 1.541509 | 197 | 197 | 2.492568 | 214 | 214 | 4.086545 | 238 | 238 | 3.464387 | 278 | 278 | 3.599634 |
| 4 | 184365744..184369351 | CDKN2AIP | 2.147318 | 1.05E-23 | 179 | 179 | 3.904372 | 188 | 188 | 4.135789 | 199 | 199 | 3.736987 | 271 | 271 | 7.680678 | 380 | 380 | 8.209577 | 358 | 358 | 6.879935 |
| X | 1520662..1532921 | ASMTL-AS1 | 2.146358 | 6.32E-06 | 33 | 35 | 1.825929 | 28 | 33 | 1.736329 | 24 | 33 | 1.482177 | 35 | 40 | 2.711489 | 47 | 51 | 2.635269 | 71 | 80 | 3.67713 |
| X | 24001837..24045303 | KLHL15 | 2.144976 | 1.95E-12 | 56 | 56 | 0.621841 | 53 | 53 | 0.593566 | 95 | 95 | 0.908207 | 96 | 96 | 1.385142 | 128 | 128 | 1.407797 | 138 | 138 | 1.350123 |
| 1 | 114935399..115053781 | TRIM33 | 2.143794 | 1.9E-26 | 363 | 363 | 2.640647 | 454 | 454 | 3.330902 | 581 | 581 | 3.638733 | 675 | 675 | 6.380277 | 845 | 845 | 6.088347 | 950 | 950 | 6.088782 |
| 8 | 57349233..57359293 | PENK | 2.140755 | 6.1E-30 | 270 | 274 | 5.523313 | 236 | 241 | 4.899688 | 290 | 292 | 5.067599 | 373 | 378 | 9.900861 | 516 | 521 | 10.40221 | 527 | 536 | 9.519562 |
| 2 | 25600067..25896503 | DTNB | 2.140418 | 3.88E-10 | 79 | 79 | 0.768872 | 65 | 65 | 0.638032 | 64 | 64 | 0.536262 | 81 | 81 | 1.024339 | 134 | 134 | 1.291727 | 160 | 160 | 1.371987 |
| 15 | 72491370..72524164 | PKM | 2.140108 | 7.37E-79 | 29832 | 30014 | 243.859 | 27512 | 27670 | 226.7391 | 34113 | 34305 | 239.9621 | 42889 | 43150 | 455.5414 | 56504 | 56812 | 457.1872 | 63414 | 63686 | 455.8921 |
| 20 | 43104526..43123244 | TTPAL | 2.13991 | 6.62E-31 | 363 | 363 | 3.58909 | 428 | 430 | 4.287939 | 454 | 455 | 3.873107 | 610 | 611 | 7.849664 | 807 | 808 | 7.912763 | 788 | 789 | 6.873183 |
| 11 | 8633584..8693413 | TRIM66 | 2.138217 | 8.57E-19 | 170 | 170 | 1.09466 | 173 | 173 | 1.123515 | 187 | 187 | 1.036674 | 232 | 232 | 1.941112 | 302 | 302 | 1.926089 | 416 | 416 | 2.360081 |
| 9 | 101569981..101612363 | GALNT12 | 2.137205 | 3.59E-20 | 149 | 182 | 4.488527 | 158 | 196 | 4.875182 | 159 | 208 | 4.416377 | 243 | 329 | 10.54291 | 262 | 354 | 8.647184 | 321 | 403 | 8.756703 |
| 2 | 222282747..222438922 | EPHA4 | 2.137053 | 5.73E-27 | 174 | 175 | 1.61346 | 212 | 213 | 1.980624 | 257 | 259 | 2.055844 | 300 | 301 | 3.605942 | 401 | 401 | 3.661875 | 438 | 440 | 3.574176 |
| 8 | 145596790..145618457 | ADCK5 | 2.136109 | 2.73E-17 | 123 | 123 | 3.124171 | 124 | 124 | 3.176535 | 127 | 127 | 2.777178 | 176 | 176 | 5.808639 | 257 | 257 | 6.465495 | 231 | 231 | 5.169455 |
| 15 | 83098710..83108085 | GOLGA6L20 | 2.135989 | 0.00581 | 10 | 60 | 0.609772 | 12 | 55 | 0.563743 | 11 | 48 | 0.419979 | 13 | 99 | 1.307325 | 20 | 97 | 0.976399 | 26 | 123 | 1.101348 |
| 1 | 179809102..179846938 | TOR1AIP2 | 2.133391 | 2.12E-34 | 563 | 574 | 2.117869 | 656 | 668 | 2.485799 | 808 | 825 | 2.620665 | 1011 | 1027 | 4.923678 | 1238 | 1259 | 4.600996 | 1309 | 1336 | 4.343069 |
| 13 | 43787654..44361044 | ENOX1 | 2.132834 | 1.89E-10 | 46 | 46 | 0.910666 | 53 | 53 | 1.058229 | 52 | 52 | 0.886288 | 70 | 70 | 1.800659 | 94 | 94 | 1.843182 | 104 | 104 | 1.814002 |
| 3 | 49726932..49758962 | RNF123 | 2.130308 | 3.64E-43 | 492 | 545 | 5.089455 | 539 | 578 | 5.443834 | 609 | 658 | 5.290186 | 777 | 851 | 10.3261 | 1052 | 1117 | 10.33158 | 1068 | 1165 | 9.585258 |
| 1 | 28905050..28909495 | SNHG12 | 2.130138 | 3.84E-15 | 88 | 88 | 1.814883 | 76 | 76 | 1.580818 | 113 | 113 | 2.006388 | 127 | 127 | 3.403313 | 188 | 188 | 3.84028 | 174 | 174 | 3.161684 |
| 17 | 46618256..46623441 | HOXB2 | 2.129606 | 3.55E-28 | 218 | 237 | 4.77056 | 208 | 229 | 4.648992 | 226 | 244 | 4.22845 | 314 | 351 | 9.180371 | 405 | 452 | 9.011528 | 435 | 496 | 8.796417 |
| 11 | 45868669..45904798 | CRY2 | 2.129509 | 3.25E-24 | 324 | 324 | 3.64016 | 303 | 303 | 3.433369 | 312 | 312 | 3.017869 | 472 | 472 | 6.890481 | 537 | 537 | 5.9757 | 655 | 655 | 6.483655 |
| 13 | 73629114..73651676 | KLF5 | 2.1282 | 1.56E-18 | 98 | 98 | 1.755033 | 104 | 104 | 1.878429 | 125 | 125 | 1.927257 | 144 | 144 | 3.35084 | 206 | 206 | 3.653974 | 229 | 229 | 3.613248 |
| 20 | 42825136..42839431 | OSER1 | 2.127899 | 1.84E-33 | 355 | 355 | 14.44181 | 363 | 363 | 14.89369 | 490 | 490 | 17.16168 | 540 | 540 | 28.54429 | 726 | 726 | 29.2529 | 870 | 870 | 31.18285 |
| 9 | 131486724..131495473 | RP11-545E17.3 | 2.125573 | 0.018463 | 12 | 16 | 2.048416 | 6 | 10 | 1.291221 | 8 | 14 | 1.543109 | 20 | 21 | 3.49341 | 11 | 20 | 2.536105 | 15 | 20 | 2.25596 |
| 12 | 27091316..27119583 | FGFR1OP2 | 2.12343 | 3.08E-27 | 221 | 223 | 2.601087 | 238 | 238 | 2.799815 | 293 | 296 | 2.972433 | 364 | 367 | 5.56222 | 420 | 422 | 4.875302 | 540 | 541 | 5.559688 |
| 6 | 105725440..105850959 | PREP | 2.123209 | 8.83E-28 | 314 | 314 | 5.813103 | 360 | 360 | 6.721762 | 467 | 467 | 7.4433 | 493 | 493 | 11.85925 | 718 | 718 | 13.16563 | 803 | 803 | 13.09776 |
| 15 | 75661720..75748183 | SIN3A | 2.12265 | 5.46E-52 | 621 | 622 | 3.478672 | 611 | 611 | 3.446408 | 764 | 764 | 3.678636 | 909 | 910 | 6.612971 | 1235 | 1236 | 6.846689 | 1378 | 1382 | 6.809799 |
| 2 | 220094479..220101391 | ANKZF1 | 2.122301 | 2.73E-33 | 260 | 260 | 2.959307 | 288 | 288 | 3.306066 | 310 | 310 | 3.037727 | 392 | 392 | 5.797421 | 530 | 530 | 5.974912 | 594 | 594 | 5.956707 |
| 6 | 42018251..42055199 | TAF8 | 2.121751 | 2.54E-27 | 176 | 176 | 1.320022 | 185 | 186 | 1.406966 | 222 | 222 | 1.43348 | 260 | 260 | 2.533809 | 363 | 363 | 2.696585 | 406 | 406 | 2.682857 |
| 19 | 53206066..53238326 | ZNF611 | 2.120508 | 5.41E-12 | 53 | 59 | 0.682239 | 74 | 77 | 0.898002 | 80 | 83 | 0.82629 | 89 | 95 | 1.427381 | 141 | 149 | 1.706513 | 135 | 149 | 1.518007 |
| 20 | 20370196..20693131 | RALGAPA2 | 2.119069 | 2.14E-26 | 187 | 187 | 1.145859 | 222 | 222 | 1.371971 | 234 | 234 | 1.234456 | 315 | 315 | 2.508026 | 398 | 398 | 2.415525 | 416 | 416 | 2.245877 |
| 8 | 95825539..95893974 | INTS8 | 2.119024 | 1.51E-24 | 196 | 202 | 1.788523 | 201 | 214 | 1.910994 | 230 | 243 | 1.852336 | 326 | 332 | 3.81956 | 376 | 395 | 3.464011 | 395 | 411 | 3.206182 |
| 16 | 89985573..90002500 | TUBB3_1 | 2.118713 | 0.000895 | 20 | 124 | 1.228817 | 15 | 118 | 1.179369 | 13 | 86 | 0.733726 | 23 | 218 | 2.807074 | 24 | 345 | 3.386285 | 38 | 361 | 3.151924 |
| 15 | 75136071..75165706 | SCAMP2 | 2.118151 | 2.9E-30 | 946 | 946 | 13.17705 | 823 | 823 | 11.5619 | 941 | 941 | 11.28462 | 1212 | 1212 | 21.93622 | 1649 | 1649 | 22.75028 | 1953 | 1953 | 23.96804 |
| 1 | 226249552..226259702 | H3F3A | 2.117664 | 6.15E-35 | 513 | 2011 | 44.51952 | 472 | 1953 | 43.60567 | 561 | 2339 | 44.57989 | 756 | 3053 | 87.82078 | 981 | 4067 | 89.17674 | 973 | 4419 | 86.19172 |
| 17 | 17206649..17250977 | NT5M | 2.117437 | 0.000196 | 12 | 12 | 0.426188 | 25 | 25 | 0.895492 | 21 | 21 | 0.64211 | 34 | 34 | 1.569027 | 26 | 26 | 0.914601 | 42 | 42 | 1.314232 |
| 3 | 170606204..170626482 | EIF5A2 | 2.1174 | 5.4E-15 | 132 | 132 | 1.643714 | 167 | 168 | 2.10991 | 246 | 246 | 2.637289 | 249 | 250 | 4.045055 | 319 | 320 | 3.946765 | 384 | 390 | 4.278781 |
| 10 | 94447945..94455403 | HHEX | 2.117231 | 1.54E-20 | 135 | 135 | 1.970291 | 136 | 136 | 2.001879 | 146 | 146 | 1.834509 | 190 | 190 | 3.60315 | 243 | 243 | 3.512707 | 303 | 303 | 3.896211 |
| 5 | 98190908..98262240 | CHD1 | 2.115238 | 1.29E-42 | 383 | 383 | 3.030846 | 397 | 397 | 3.168531 | 442 | 442 | 3.011326 | 578 | 578 | 5.943264 | 752 | 752 | 5.89416 | 817 | 817 | 5.696266 |
| 11 | 44117099..44266979 | EXT2 | 2.113936 | 3.33E-52 | 1246 | 1246 | 16.41678 | 1352 | 1352 | 17.9659 | 1673 | 1673 | 18.97738 | 2071 | 2071 | 35.45538 | 2546 | 2546 | 33.22518 | 2835 | 2835 | 32.90987 |
| 20 | 25275379..25371619 | ABHD12 | 2.11373 | 7.93E-57 | 1271 | 1302 | 26.44482 | 1379 | 1397 | 28.61728 | 1575 | 1587 | 27.75089 | 1930 | 1946 | 51.35758 | 2669 | 2683 | 53.97458 | 2826 | 2849 | 50.98298 |

| 5 | 115779312..115910630 | SEMA6A | 2.113668 | 7.46E-06 | 25 | 30 | 0.190707 | 26 | 29 | 0.185928 | 27 | 30 | 0.164186 | 39 | 46 | 0.379957 | 54 | 59 | 0.371481 | 44 | 53 | 0.296841 |
| --- | --- | --- | --- | --- | --- | --- | --- | --- | --- | --- | --- | --- | --- | --- | --- | --- | --- | --- | --- | --- | --- | --- |
| 2 | 242576628..242613272 | ATG4B | 2.113392 | 7.55E-40 | 467 | 467 | 4.899782 | 523 | 523 | 5.534315 | 557 | 557 | 5.03136 | 749 | 749 | 10.21113 | 950 | 950 | 9.872394 | 1012 | 1012 | 9.354994 |
| 17 | 43471275..43511787 | ARHGAP27 | 2.11329 | 2.41E-21 | 152 | 152 | 1.371271 | 155 | 155 | 1.410308 | 163 | 163 | 1.266012 | 241 | 241 | 2.825068 | 275 | 275 | 2.457262 | 307 | 308 | 2.448125 |
| 4 | 128702976..128761888 | HSPA4L | 2.112878 | 1.69E-26 | 176 | 181 | 1.084756 | 197 | 200 | 1.208888 | 224 | 235 | 1.212528 | 287 | 291 | 2.266098 | 376 | 380 | 2.255673 | 382 | 390 | 2.059308 |
| 12 | 116997186..117014425 | MAP1LC3B2 | 2.112397 | 2.04E-07 | 31 | 71 | 5.943362 | 31 | 75 | 6.331949 | 65 | 120 | 8.648193 | 60 | 113 | 12.29092 | 85 | 153 | 12.6854 | 76 | 127 | 9.366571 |
| 2 | 179296141..179316239 | PRKRA | 2.111638 | 4.73E-31 | 257 | 320 | 5.655105 | 232 | 297 | 5.29358 | 310 | 420 | 6.390139 | 370 | 471 | 10.81543 | 505 | 607 | 10.62474 | 524 | 686 | 10.68115 |
| 1 | 247263264..247267674 | ZNF669 | 2.110667 | 3.36E-06 | 35 | 35 | 1.231119 | 34 | 34 | 1.206183 | 39 | 39 | 1.181046 | 70 | 70 | 3.199352 | 58 | 60 | 2.090365 | 59 | 61 | 1.890449 |
| 9 | 20658308..20995954 | FOCAD | 2.109646 | 2.43E-22 | 459 | 475 | 4.0398 | 600 | 634 | 5.438233 | 753 | 793 | 5.806438 | 870 | 907 | 10.02318 | 1078 | 1118 | 9.417748 | 1196 | 1238 | 9.276625 |
| 22 | 40766595..40806293 | SGSM3 | 2.107404 | 1.49E-44 | 595 | 595 | 8.687518 | 572 | 572 | 8.4232 | 663 | 663 | 8.334175 | 863 | 863 | 16.37275 | 1072 | 1072 | 15.50289 | 1273 | 1273 | 16.37609 |
| 5 | 177038254..177046755 | RP11-1277A3.1 | 2.107164 | 0.001396 | 17 | 25 | 0.994377 | 15 | 19 | 0.762196 | 20 | 30 | 1.027312 | 21 | 27 | 1.395426 | 21 | 27 | 1.063687 | 50 | 59 | 2.067598 |
| 1 | 109656301..109749401 | KIAA1324 | 2.106892 | 0.010738 | 5 | 5 | 0.037452 | 10 | 11 | 0.0831 | 14 | 14 | 0.090283 | 15 | 15 | 0.145993 | 16 | 16 | 0.118704 | 20 | 20 | 0.13199 |
| 12 | 498439..551811 | CCDC77 | 2.106201 | 4.84E-11 | 47 | 47 | 0.905747 | 57 | 57 | 1.107863 | 77 | 77 | 1.277527 | 75 | 75 | 1.878029 | 116 | 116 | 2.214145 | 126 | 126 | 2.139354 |
| 20 | 49126891..49201299 | PTPN1 | 2.104529 | 1.17E-45 | 612 | 613 | 12.09779 | 657 | 657 | 13.07715 | 732 | 734 | 12.4713 | 933 | 937 | 24.02797 | 1264 | 1264 | 24.70766 | 1299 | 1301 | 22.62173 |
| 15 | 30762982..30799826 | CTD-3092A11.1 | 2.102965 | 0.000101 | 19 | 36 | 1.075616 | 20 | 45 | 1.356031 | 22 | 47 | 1.208991 | 24 | 52 | 2.018786 | 43 | 95 | 2.811366 | 40 | 96 | 2.527139 |
| 17 | 7476144..7485342 | SNORA67_8 | 2.102705 | 0.000533 | 16 | 41 | 0.627029 | 12 | 47 | 0.724944 | 20 | 62 | 0.816331 | 26 | 122 | 2.424354 | 24 | 111 | 1.681381 | 34 | 150 | 2.02115 |
| 1 | 193065598..193075244 | GLRX2 | 2.102056 | 1.46E-12 | 88 | 88 | 4.718138 | 103 | 103 | 5.569645 | 93 | 93 | 4.292806 | 114 | 114 | 7.941909 | 197 | 197 | 10.46148 | 189 | 189 | 8.927974 |
| 19 | 10677138..10679735 | CDKN2D | 2.100357 | 3.12E-16 | 101 | 101 | 4.680147 | 85 | 85 | 3.972459 | 108 | 108 | 4.308561 | 146 | 146 | 8.790692 | 174 | 174 | 7.985946 | 192 | 192 | 7.838672 |
| 8 | 143808621..143818345 | THEM6 | 2.098715 | 8.2E-21 | 165 | 192 | 4.377107 | 149 | 160 | 3.678817 | 161 | 188 | 3.689896 | 235 | 265 | 7.849895 | 276 | 311 | 7.022396 | 317 | 360 | 7.230886 |
| 17 | 77806955..77813228 | CBX4 | 2.098193 | 3.56E-30 | 419 | 419 | 10.13255 | 370 | 370 | 9.0242 | 416 | 416 | 8.661005 | 545 | 545 | 17.1251 | 734 | 734 | 17.58084 | 833 | 833 | 17.74814 |
| 1 | 178694300..178889238 | RALGPS2 | 2.097988 | 1.28E-17 | 336 | 339 | 3.181089 | 454 | 456 | 4.315621 | 587 | 594 | 4.798803 | 662 | 670 | 8.169266 | 796 | 800 | 7.435414 | 914 | 920 | 7.606189 |
| 6 | 157710418..157744633 | TMEM242 | 2.097244 | 2.68E-21 | 153 | 153 | 2.294544 | 164 | 164 | 2.480568 | 188 | 188 | 2.427354 | 259 | 259 | 5.04704 | 279 | 279 | 4.144271 | 338 | 338 | 4.466062 |
| 12 | 113736564..113797298 | SLC8B1 | 2.096544 | 2.05E-22 | 440 | 440 | 4.527823 | 421 | 421 | 4.369394 | 401 | 402 | 3.561502 | 612 | 612 | 8.183145 | 755 | 755 | 7.69525 | 841 | 841 | 7.624931 |
| 14 | 101245747..101327368 | MEG3 | 2.094794 | 7.63E-37 | 2184 | 3256 | 14.38061 | 2391 | 3463 | 15.4258 | 2414 | 3486 | 13.25533 | 3222 | 4455 | 25.56659 | 4081 | 5675 | 24.82549 | 4943 | 6893 | 26.82282 |
| 14 | 74178494..74181128 | PNMA1 | 2.093309 | 3.83E-50 | 973 | 973 | 25.71754 | 1002 | 1002 | 26.71078 | 1087 | 1087 | 24.73525 | 1425 | 1425 | 48.93994 | 1827 | 1827 | 47.8293 | 2086 | 2086 | 48.57736 |
| 11 | 67351066..67354131 | GSTP1 | 2.092908 | 9.94E-43 | 2757 | 2757 | 99.74776 | 2683 | 2683 | 97.90151 | 3030 | 3030 | 94.37987 | 3731 | 3731 | 175.3976 | 5041 | 5041 | 180.6434 | 6085 | 6085 | 193.968 |
| 20 | 3907956..3996229 | RNF24 | 2.09272 | 1.05E-39 | 1143 | 1144 | 10.39061 | 1278 | 1278 | 11.70707 | 1657 | 1657 | 12.9571 | 1864 | 1864 | 21.9985 | 2437 | 2437 | 21.92348 | 2756 | 2756 | 22.05451 |
| 11 | 47738072..47788995 | FNBP4 | 2.091939 | 8.11E-24 | 639 | 639 | 5.861174 | 606 | 606 | 5.606072 | 593 | 593 | 4.682834 | 821 | 821 | 9.784958 | 1123 | 1123 | 10.2024 | 1287 | 1287 | 10.40077 |
| 1 | 35899091..36023551 | KIAA0319L | 2.090831 | 4.31E-47 | 735 | 740 | 5.352389 | 743 | 745 | 5.434687 | 944 | 949 | 5.909524 | 1076 | 1079 | 10.14074 | 1523 | 1528 | 10.94658 | 1606 | 1614 | 10.28543 |
| 3 | 185300284..185351339 | SENP2 | 2.089147 | 3.88E-26 | 278 | 278 | 2.700744 | 301 | 301 | 2.949221 | 343 | 343 | 2.868818 | 453 | 453 | 5.718325 | 584 | 584 | 5.619406 | 553 | 553 | 4.73333 |
| 1 | 145373054..145382434 | RP11-458D21.1 | 2.088703 | 0.039335 | 7 | 8 | 0.227045 | 6 | 8 | 0.228989 | 11 | 13 | 0.317641 | 7 | 8 | 0.295015 | 22 | 26 | 0.730861 | 13 | 16 | 0.400079 |
| 7 | 1509913..1545489 | INTS1 | 2.087251 | 6.96E-39 | 2796 | 2796 | 20.30983 | 2488 | 2488 | 18.22728 | 2854 | 2854 | 17.84816 | 3737 | 3737 | 35.27153 | 4933 | 4933 | 35.49108 | 5511 | 5511 | 35.26977 |
| 6 | 28399707..28411279 | ZSCAN23 | 2.085237 | 0.000174 | 17 | 17 | 0.360641 | 23 | 23 | 0.492103 | 22 | 22 | 0.401809 | 25 | 25 | 0.689125 | 33 | 33 | 0.693393 | 50 | 50 | 0.934543 |
| 5 | 94890778..94940768 | ARSK | 2.08514 | 2.01E-16 | 146 | 149 | 2.405488 | 147 | 147 | 2.393518 | 225 | 225 | 3.127302 | 260 | 261 | 5.475069 | 319 | 319 | 5.100898 | 306 | 306 | 4.352528 |
| 5 | 139536904..139552636 | CTB-131B5.5 | 2.084983 | 0.007043 | 12 | 12 | 0.136116 | 8 | 8 | 0.091521 | 14 | 14 | 0.136718 | 21 | 21 | 0.309514 | 19 | 19 | 0.213462 | 19 | 19 | 0.189883 |
| 11 | 68228186..68382802 | PPP6R3 | 2.084914 | 1.05E-33 | 464 | 580 | 4.847566 | 506 | 691 | 5.824734 | 637 | 851 | 6.123442 | 779 | 1000 | 10.85995 | 895 | 1187 | 9.826197 | 1093 | 1404 | 10.3387 |
| 17 | 79008948..79091232 | BAIAP2 | 2.084661 | 1.75E-33 | 311 | 311 | 2.110695 | 320 | 320 | 2.19037 | 341 | 341 | 1.992461 | 447 | 447 | 3.941892 | 596 | 596 | 4.006364 | 643 | 643 | 3.844848 |
| 18 | 12328943..12377313 | AFG3L2 | 2.083812 | 1.22E-38 | 489 | 628 | 6.602926 | 466 | 590 | 6.256496 | 612 | 782 | 7.078706 | 699 | 881 | 12.03607 | 993 | 1247 | 12.9862 | 1017 | 1276 | 11.82036 |
| 14 | 35870717..35873955 | NFKBIA | 2.083544 | 2.54E-24 | 281 | 281 | 8.247184 | 248 | 248 | 7.340969 | 278 | 278 | 7.024485 | 351 | 351 | 13.38562 | 512 | 512 | 14.88361 | 542 | 542 | 14.01528 |
| 2 | 191745553..191830278 | GLS | 2.083296 | 2.66E-17 | 823 | 1091 | 7.732162 | 1009 | 1335 | 9.542447 | 1365 | 1798 | 10.97075 | 1644 | 2142 | 19.72549 | 1867 | 2498 | 17.53507 | 1897 | 2548 | 15.91031 |
| 14 | 23776044..23794578 | BCL2L2-PABPN1 | 2.081114 | 0.007899 | 19 | 57 | 2.56449 | 30 | 89 | 4.038485 | 49 | 111 | 4.299515 | 28 | 74 | 4.326034 | 48 | 121 | 5.392008 | 97 | 227 | 8.99819 |
| 10 | 121485609..121588652 | INPP5F | 2.080645 | 3.83E-26 | 231 | 231 | 2.601595 | 258 | 258 | 2.930554 | 330 | 330 | 3.19972 | 381 | 381 | 5.575511 | 457 | 457 | 5.097801 | 574 | 574 | 5.695642 |
| 16 | 23474863..23533316 | GGA2 | 2.080234 | 8.54E-36 | 693 | 693 | 5.863781 | 678 | 678 | 5.785975 | 772 | 773 | 5.631114 | 1051 | 1051 | 11.55525 | 1314 | 1314 | 11.01232 | 1320 | 1320 | 9.8406 |
| 16 | 4421849..4433529 | VASN | 2.079207 | 3.86E-18 | 786 | 6143 | 152.472 | 671 | 5602 | 140.2345 | 679 | 6185 | 132.1659 | 1007 | 8499 | 274.1002 | 1363 | 11379 | 279.7387 | 1340 | 13134 | 287.2166 |
| 22 | 31884674..32014572 | SFI1 | 2.078209 | 3.13E-19 | 157 | 158 | 0.914113 | 132 | 135 | 0.787733 | 165 | 166 | 0.826839 | 216 | 221 | 1.661373 | 288 | 297 | 1.701916 | 278 | 281 | 1.43236 |
| 4 | 103552660..103682151 | MANBA | 2.077582 | 2.18E-24 | 432 | 432 | 3.572446 | 474 | 474 | 3.953325 | 676 | 676 | 4.812812 | 766 | 766 | 8.230813 | 908 | 908 | 7.437153 | 1022 | 1022 | 7.446221 |
| 12 | 57449426..57481846 | TMEM194A | 2.077499 | 2.02E-09 | 95 | 95 | 1.159142 | 119 | 119 | 1.464409 | 202 | 202 | 2.121949 | 202 | 202 | 3.202555 | 230 | 230 | 2.779585 | 273 | 273 | 2.934803 |
| 19 | 20718631..20748615 | ZNF737 | 2.077438 | 8.48E-06 | 18 | 22 | 0.432951 | 38 | 39 | 0.774076 | 40 | 40 | 0.677715 | 43 | 44 | 1.125126 | 49 | 49 | 0.955106 | 74 | 76 | 1.317751 |
| 15 | 68499330..68549549 | CLN6 | 2.077399 | 1.16E-12 | 78 | 246 | 4.055137 | 81 | 238 | 3.956851 | 89 | 288 | 4.087269 | 96 | 295 | 6.318653 | 153 | 410 | 6.694116 | 182 | 464 | 6.738939 |
| 10 | 12110971..12165224 | DHTKD1 | 2.076952 | 2.29E-26 | 227 | 229 | 3.020066 | 264 | 264 | 3.511456 | 321 | 322 | 3.656008 | 379 | 379 | 6.494597 | 510 | 510 | 6.661778 | 505 | 505 | 5.867802 |

| 3 | 9022275..9404737 | SRGAP3 | 2.076899 | 0.000826 | 27 | 27 | 0.099684 | 22 | 23 | 0.085643 | 9 | 9 | 0.028607 | 28 | 29 | 0.139121 | 33 | 34 | 0.124332 | 40 | 41 | 0.133368 |
| --- | --- | --- | --- | --- | --- | --- | --- | --- | --- | --- | --- | --- | --- | --- | --- | --- | --- | --- | --- | --- | --- | --- |
| 7 | 2443223..2474242 | CHST12 | 2.076596 | 2.01E-32 | 375 | 375 | 11.81244 | 319 | 319 | 10.13448 | 408 | 408 | 11.06468 | 502 | 502 | 20.5468 | 657 | 657 | 20.49806 | 744 | 744 | 20.64831 |
| 13 | 21302870..21348097 | N6AMT2 | 2.07622 | 1.62E-11 | 57 | 57 | 2.964773 | 67 | 67 | 3.514744 | 72 | 72 | 3.224181 | 85 | 85 | 5.744702 | 111 | 111 | 5.718453 | 143 | 143 | 6.553235 |
| 17 | 41447213..41466567 | LINC00910 | 2.075085 | 1.08E-05 | 41 | 41 | 0.41414 | 44 | 44 | 0.448247 | 25 | 25 | 0.217407 | 61 | 61 | 0.800617 | 62 | 62 | 0.620288 | 67 | 67 | 0.596267 |
| X | 46433219..46457843 | CHST7 | 2.075044 | 5.65E-22 | 180 | 180 | 5.476762 | 157 | 157 | 4.81785 | 213 | 213 | 5.579577 | 233 | 233 | 9.21169 | 347 | 347 | 10.45731 | 370 | 370 | 9.918733 |
| 3 | 52870235..52931612 | TMEM110 | 2.074666 | 4.19E-06 | 54 | 368 | 4.472912 | 58 | 341 | 4.180221 | 68 | 386 | 4.039245 | 82 | 489 | 7.722954 | 142 | 643 | 7.740918 | 84 | 647 | 6.92867 |
| 19 | 58089824..58105145 | ZIK1 | 2.074237 | 7.46E-09 | 45 | 45 | 0.596172 | 39 | 39 | 0.521106 | 55 | 55 | 0.627324 | 59 | 59 | 1.015648 | 81 | 81 | 1.062877 | 100 | 100 | 1.167246 |
| 6 | 122720691..122754264 | HSF2 | 2.073608 | 3.61E-15 | 76 | 76 | 1.958959 | 101 | 101 | 2.625642 | 124 | 125 | 2.773908 | 133 | 134 | 4.487957 | 181 | 185 | 4.72305 | 204 | 206 | 4.678236 |
| 3 | 40351175..40353915 | EIF1B | 2.07276 | 2.09E-26 | 247 | 247 | 8.997176 | 266 | 266 | 9.772219 | 366 | 366 | 11.47785 | 386 | 386 | 18.26958 | 545 | 545 | 19.66277 | 578 | 578 | 18.54984 |
| 11 | 65383244..65404910 | PCNXL3 | 2.072327 | 3.58E-55 | 1334 | 1334 | 11.65429 | 1314 | 1314 | 11.57784 | 1505 | 1505 | 11.31975 | 1876 | 1876 | 21.29584 | 2466 | 2466 | 21.3384 | 2831 | 2831 | 21.79078 |
| 17 | 54911460..54946036 | DGKE | 2.071839 | 4.16E-10 | 43 | 51 | 0.353745 | 68 | 73 | 0.510676 | 72 | 77 | 0.459813 | 92 | 97 | 0.874226 | 99 | 116 | 0.796924 | 123 | 142 | 0.867784 |
| 5 | 79703832..79775169 | ZFYVE16 | 2.071427 | 2.48E-17 | 315 | 315 | 1.914191 | 427 | 427 | 2.617007 | 545 | 546 | 2.856522 | 614 | 614 | 4.848139 | 738 | 738 | 4.441912 | 837 | 837 | 4.481291 |
| 7 | 64432154..64467062 | ZNF117 | 2.071124 | 1.9E-13 | 80 | 80 | 0.521304 | 115 | 116 | 0.762362 | 129 | 129 | 0.723704 | 162 | 163 | 1.380131 | 199 | 201 | 1.297286 | 192 | 193 | 1.108054 |
| 7 | 99143931..99156159 | FAM200A | 2.070274 | 8.1E-10 | 55 | 55 | 1.409841 | 41 | 41 | 1.05997 | 71 | 71 | 1.566882 | 85 | 85 | 2.831121 | 93 | 93 | 2.361182 | 108 | 108 | 2.439127 |
| X | 38128416..38186817 | RPGR | 2.070207 | 4.38E-09 | 50 | 83 | 0.809272 | 46 | 69 | 0.678528 | 50 | 93 | 0.780674 | 61 | 97 | 1.228911 | 88 | 134 | 1.294077 | 103 | 144 | 1.237035 |
| 16 | 67927175..67963581 | PSKH1 | 2.070012 | 3.02E-34 | 288 | 581 | 10.17461 | 291 | 615 | 10.86223 | 362 | 712 | 10.73475 | 418 | 830 | 18.88651 | 560 | 1107 | 19.20119 | 641 | 1231 | 18.9934 |
| 3 | 195590235..195638816 | TNK2 | 2.069955 | 3.59E-20 | 784 | 854 | 5.264921 | 635 | 691 | 4.296496 | 698 | 743 | 3.943603 | 968 | 1029 | 8.242927 | 1321 | 1422 | 8.683056 | 1376 | 1452 | 7.886853 |
| 7 | 143548468..143599291 | FAM115A | 2.069945 | 1E-81 | 1672 | 2335 | 25.77239 | 1725 | 2389 | 26.59416 | 2036 | 2879 | 27.35771 | 2546 | 3539 | 50.75518 | 3223 | 4453 | 48.681 | 3549 | 5010 | 48.72015 |
| 1 | 25568728..25664704 | C1orf63 | 2.068557 | 1.58E-45 | 634 | 648 | 6.632967 | 625 | 639 | 6.596841 | 736 | 744 | 6.556561 | 927 | 931 | 12.38268 | 1141 | 1149 | 11.64909 | 1361 | 1367 | 12.32834 |
| X | 220025..230886 | GTPBP6 | 2.06797 | 5.57E-21 | 522 | 522 | 15.38523 | 404 | 404 | 12.00928 | 495 | 495 | 12.56056 | 652 | 652 | 24.96969 | 817 | 817 | 23.85033 | 985 | 985 | 25.57836 |
| 15 | 98462784..98517068 | ARRDC4 | 2.06753 | 8.18E-34 | 364 | 364 | 6.156192 | 389 | 389 | 6.635333 | 422 | 422 | 6.144599 | 515 | 515 | 11.31749 | 740 | 740 | 12.396 | 769 | 769 | 11.45883 |
| 11 | 1295601..1330884 | TOLLIP | 2.067202 | 4.03E-45 | 1178 | 1204 | 14.01537 | 1129 | 1142 | 13.40746 | 1257 | 1272 | 12.74781 | 1672 | 1689 | 25.547 | 2117 | 2154 | 24.83492 | 2337 | 2359 | 24.19408 |
| 9 | 37800499..37867663 | DCAF10 | 2.067033 | 2.3E-11 | 55 | 470 | 3.85465 | 61 | 455 | 3.763577 | 80 | 560 | 3.95408 | 102 | 609 | 6.489878 | 106 | 773 | 6.279219 | 127 | 823 | 5.946893 |
| X | 53111549..53117722 | TSPYL2 | 2.066898 | 1.49E-27 | 346 | 346 | 4.870163 | 302 | 302 | 4.287229 | 368 | 368 | 4.459494 | 436 | 436 | 7.974179 | 606 | 606 | 8.448489 | 713 | 713 | 8.842195 |
| 11 | 129733531..129765485 | NFRKB | 2.066492 | 1.05E-33 | 338 | 338 | 3.715927 | 371 | 371 | 4.113644 | 388 | 388 | 3.672422 | 494 | 494 | 7.056828 | 647 | 647 | 7.045207 | 748 | 748 | 7.245281 |
| 14 | 75548822..75594047 | NEK9 | 2.066353 | 2.99E-43 | 1451 | 1451 | 12.599 | 1473 | 1473 | 12.89952 | 2007 | 2007 | 15.00328 | 2288 | 2288 | 25.81408 | 2921 | 2922 | 25.12973 | 3191 | 3192 | 24.41938 |
| 9 | 86354336..86444431 | GKAP1 | 2.065981 | 0.000104 | 21 | 21 | 0.432585 | 20 | 20 | 0.415513 | 23 | 23 | 0.407897 | 31 | 31 | 0.829747 | 41 | 41 | 0.836517 | 38 | 38 | 0.689666 |
| 19 | 38397868..38699012 | SIPA1L3 | 2.063876 | 5.02E-21 | 526 | 526 | 3.544642 | 450 | 450 | 3.058451 | 477 | 477 | 2.767422 | 636 | 636 | 5.568982 | 872 | 872 | 5.820257 | 1011 | 1011 | 6.002621 |
| 3 | 50357458..50365682 | TUSC2 | 2.063386 | 9.53E-25 | 185 | 185 | 5.35517 | 212 | 212 | 6.189274 | 223 | 223 | 5.557465 | 272 | 272 | 10.23063 | 383 | 383 | 10.98093 | 410 | 410 | 10.45655 |
| 8 | 74692332..74791145 | UBE2W | 2.063292 | 4.98E-07 | 27 | 120 | 0.919421 | 34 | 153 | 1.182298 | 52 | 217 | 1.431408 | 43 | 199 | 1.981155 | 72 | 295 | 2.238692 | 79 | 313 | 2.112909 |
| 8 | 62413116..62627155 | ASPH | 2.06079 | 1.1E-112 | 6160 | 6220 | 31.7781 | 6178 | 6300 | 32.46238 | 7614 | 7767 | 34.16341 | 9083 | 9264 | 61.49902 | 11914 | 12062 | 61.03738 | 13100 | 13317 | 59.94419 |
| 4 | 157997209..158093242 | GLRB | 2.060446 | 2.66E-11 | 76 | 76 | 1.530242 | 113 | 113 | 2.294707 | 115 | 115 | 1.993493 | 161 | 161 | 4.212157 | 177 | 177 | 3.529871 | 177 | 177 | 3.139952 |
| 17 | 3566196..3571976 | TAX1BP3 | 2.059085 | 1.13E-34 | 645 | 2021 | 102.2185 | 742 | 2238 | 114.1631 | 923 | 2703 | 117.7008 | 1005 | 3058 | 200.9707 | 1405 | 4143 | 207.5473 | 1537 | 4402 | 196.1627 |
| 10 | 105127724..105148822 | TAF5 | 2.058956 | 3.6E-07 | 32 | 32 | 0.68197 | 44 | 44 | 0.945736 | 56 | 56 | 1.02748 | 60 | 60 | 1.661493 | 63 | 63 | 1.329825 | 103 | 103 | 1.933995 |
| 17 | 62473902..62493154 | POLG2 | 2.058486 | 1.1E-10 | 57 | 57 | 1.171733 | 66 | 66 | 1.368359 | 64 | 64 | 1.132672 | 96 | 96 | 2.56423 | 111 | 111 | 2.260038 | 112 | 112 | 2.028499 |
| 12 | 30862486..30907885 | CAPRIN2 | 2.058183 | 1.21E-21 | 198 | 198 | 1.649514 | 203 | 203 | 1.705647 | 278 | 278 | 1.993912 | 324 | 324 | 3.50726 | 424 | 424 | 3.498611 | 403 | 403 | 2.958006 |
| 7 | 92190107..92219708 | FAM133B | 2.057356 | 1.57E-17 | 160 | 261 | 4.073878 | 132 | 234 | 3.683713 | 161 | 269 | 3.614849 | 192 | 343 | 6.956547 | 294 | 465 | 7.188851 | 291 | 464 | 6.380999 |
| 19 | 12460185..12476719 | ZNF442 | 2.056863 | 0.040451 | 6 | 6 | 0.132786 | 9 | 9 | 0.200884 | 10 | 10 | 0.190533 | 11 | 11 | 0.316319 | 19 | 20 | 0.438399 | 13 | 14 | 0.27298 |
| 2 | 11295324..11319000 | PQLC3 | 2.056691 | 9.46E-16 | 161 | 161 | 4.928805 | 240 | 240 | 7.410189 | 250 | 250 | 6.5891 | 313 | 313 | 12.45065 | 373 | 373 | 11.31002 | 420 | 420 | 11.32839 |
| 17 | 76670130..76778379 | CYTH1 | 2.054804 | 5.69E-25 | 299 | 299 | 3.780719 | 251 | 251 | 3.200953 | 323 | 323 | 3.51622 | 408 | 408 | 6.703404 | 540 | 540 | 6.762946 | 538 | 538 | 5.993612 |
| 19 | 36525887..36545664 | THAP8 | 2.053479 | 1.04E-13 | 96 | 195 | 7.441644 | 73 | 176 | 6.774063 | 98 | 216 | 7.096731 | 121 | 264 | 13.09092 | 152 | 354 | 13.38063 | 183 | 394 | 13.24749 |
| 7 | 33053742..33102409 | NT5C3A | 2.053411 | 6.63E-09 | 62 | 90 | 1.807947 | 61 | 99 | 2.005768 | 91 | 132 | 2.282903 | 119 | 161 | 4.202437 | 128 | 178 | 3.541623 | 112 | 174 | 3.07961 |
| 17 | 14204400..14252721 | HS3ST3B1 | 2.053244 | 5.87E-27 | 290 | 338 | 4.386137 | 262 | 290 | 3.795473 | 303 | 335 | 3.742663 | 368 | 419 | 7.064991 | 524 | 591 | 7.596123 | 573 | 662 | 7.568793 |
| 18 | 25530930..25757410 | CDH2 | 2.053197 | 6.82E-40 | 703 | 709 | 9.97558 | 801 | 812 | 11.52259 | 985 | 992 | 12.01639 | 1150 | 1160 | 21.20713 | 1452 | 1461 | 20.36016 | 1622 | 1634 | 20.25569 |
| 16 | 11762270..11773015 | SNN | 2.052783 | 1.08E-33 | 607 | 607 | 12.76426 | 592 | 592 | 12.55541 | 655 | 655 | 11.85819 | 832 | 832 | 22.73328 | 1175 | 1175 | 24.4728 | 1160 | 1160 | 21.49156 |
| 8 | 126442563..126450647 | TRIB1 | 2.052543 | 4.41E-24 | 184 | 184 | 3.096881 | 211 | 211 | 3.581718 | 254 | 254 | 3.680533 | 281 | 281 | 6.145327 | 408 | 408 | 6.801517 | 417 | 417 | 6.183663 |
| 9 | 96208776..96215874 | FAM120AOS | 2.052298 | 6.88E-37 | 365 | 384 | 7.195083 | 346 | 364 | 6.87873 | 412 | 426 | 6.872021 | 505 | 525 | 12.78192 | 658 | 673 | 12.48989 | 754 | 782 | 12.90965 |
| 3 | 184079506..184086384 | POLR2H | 2.051396 | 8.81E-08 | 52 | 175 | 3.87415 | 107 | 217 | 4.845075 | 109 | 213 | 4.059648 | 120 | 186 | 5.350365 | 161 | 261 | 5.722923 | 174 | 311 | 6.065993 |
| 8 | 145747761..145752416 | LRRC24 | 2.050896 | 0.019057 | 14 | 63 | 2.476133 | 9 | 50 | 1.98201 | 9 | 47 | 1.590383 | 13 | 53 | 2.706708 | 15 | 88 | 3.425745 | 27 | 86 | 2.978071 |

| 1 | 210501596..210849638 | HHAT | 2.049939 | 1.88E-05 | 20 | 20 | 0.324237 | 25 | 25 | 0.408766 | 43 | 43 | 0.600166 | 32 | 32 | 0.674085 | 61 | 61 | 0.979494 | 57 | 57 | 0.814162 |
| --- | --- | --- | --- | --- | --- | --- | --- | --- | --- | --- | --- | --- | --- | --- | --- | --- | --- | --- | --- | --- | --- | --- |
| 12 | 110890289..110907073 | GPN3 | 2.049072 | 3.61E-12 | 60 | 61 | 1.637154 | 91 | 91 | 2.463222 | 113 | 114 | 2.634116 | 118 | 118 | 4.115038 | 156 | 156 | 4.146898 | 174 | 174 | 4.114453 |
| 1 | 207925402..207968858 | CD46 | 2.047037 | 7.47E-22 | 1260 | 1270 | 10.1574 | 1594 | 1611 | 12.99501 | 2025 | 2034 | 14.00554 | 2335 | 2350 | 24.42185 | 2804 | 2823 | 22.36292 | 3041 | 3075 | 21.66841 |
| 15 | 65294845..65321977 | MTFMT | 2.046519 | 1.4E-19 | 135 | 137 | 3.915274 | 141 | 141 | 4.064087 | 146 | 146 | 3.592235 | 187 | 187 | 6.944089 | 252 | 254 | 7.189759 | 280 | 280 | 7.050221 |
| 12 | 49082247..49110681 | CCNT1 | 2.046394 | 2.14E-16 | 236 | 236 | 2.262421 | 306 | 306 | 2.958593 | 419 | 419 | 3.458166 | 441 | 441 | 5.493285 | 561 | 561 | 5.326763 | 614 | 614 | 5.186006 |
| X | 131157293..131209971 | MST4 | 2.046349 | 0.000295 | 17 | 17 | 0.353007 | 25 | 25 | 0.523572 | 36 | 36 | 0.643586 | 32 | 32 | 0.863408 | 62 | 62 | 1.27516 | 38 | 38 | 0.695218 |
| 8 | 99413631..99955055 | STK3 | 2.04597 | 1.37E-14 | 145 | 145 | 0.848772 | 200 | 200 | 1.180743 | 246 | 246 | 1.239734 | 264 | 264 | 2.007979 | 319 | 319 | 1.849494 | 419 | 419 | 2.160928 |
| 1 | 15817327..15853029 | CASP9 | 2.044261 | 2.26E-14 | 108 | 109 | 1.440773 | 99 | 100 | 1.333126 | 121 | 121 | 1.37697 | 157 | 159 | 2.730852 | 167 | 168 | 2.199466 | 233 | 235 | 2.73678 |
| 17 | 7128660..7137864 | DVL2 | 2.044025 | 4.73E-54 | 1197 | 1197 | 15.58251 | 1168 | 1168 | 15.33517 | 1438 | 1438 | 16.11657 | 1658 | 1658 | 28.04529 | 2270 | 2270 | 29.26902 | 2543 | 2543 | 29.16707 |
| 4 | 113152893..113191203 | AP1AR | 2.043416 | 1.25E-16 | 144 | 144 | 2.912034 | 168 | 168 | 3.426459 | 199 | 199 | 3.464634 | 232 | 232 | 6.096127 | 338 | 338 | 6.770016 | 293 | 293 | 5.220411 |
| 19 | 55851221..55859488 | SUV420H2 | 2.042445 | 3.44E-06 | 41 | 63 | 0.918892 | 20 | 36 | 0.529576 | 42 | 49 | 0.615305 | 46 | 59 | 1.11817 | 56 | 70 | 1.011255 | 73 | 93 | 1.195115 |
| X | 64708615..64727767 | ZC3H12B | 2.04049 | 0.000288 | 16 | 16 | 0.153575 | 15 | 15 | 0.145209 | 28 | 28 | 0.231381 | 29 | 29 | 0.361685 | 34 | 34 | 0.323235 | 37 | 37 | 0.312899 |
| 4 | 124386..157779 | ZNF718 | 2.039537 | 0.004302 | 11 | 14 | 0.2087 | 10 | 15 | 0.225521 | 19 | 30 | 0.385022 | 16 | 25 | 0.484246 | 28 | 46 | 0.67919 | 24 | 36 | 0.472824 |
| 8 | 87497059..87573726 | CPNE3 | 2.038948 | 1.02E-30 | 513 | 893 | 9.156951 | 549 | 1033 | 10.68322 | 751 | 1467 | 12.9509 | 827 | 1582 | 21.07842 | 1020 | 1947 | 19.77445 | 1205 | 2226 | 20.11073 |
| 8 | 145579091..145583036 | FBXL6 | 2.038837 | 3.78E-10 | 52 | 198 | 4.085908 | 48 | 206 | 4.287389 | 79 | 203 | 3.606531 | 83 | 218 | 5.845369 | 111 | 281 | 5.743395 | 108 | 314 | 5.708948 |
| 17 | 80709940..80900724 | TBCD | 2.037921 | 6.22E-37 | 1515 | 1530 | 10.17557 | 1340 | 1356 | 9.095561 | 1641 | 1651 | 9.453332 | 1985 | 2001 | 17.29206 | 2789 | 2805 | 18.47734 | 2852 | 2871 | 16.82301 |
| 22 | 38226862..38245334 | ANKRD54 | 2.034872 | 1.32E-23 | 182 | 184 | 3.436549 | 165 | 165 | 3.108072 | 209 | 209 | 3.360635 | 259 | 270 | 6.552403 | 324 | 326 | 6.030611 | 355 | 362 | 5.956847 |
| 19 | 18485541..18499986 | GDF15 | 2.034649 | 1.84E-52 | 911 | 911 | 30.40136 | 900 | 900 | 30.29141 | 1074 | 1074 | 30.85669 | 1302 | 1302 | 56.45699 | 1736 | 1736 | 57.38038 | 1833 | 1833 | 53.89398 |
| 13 | 27131840..27263085 | WASF3 | 2.032863 | 6E-34 | 342 | 342 | 4.614294 | 327 | 327 | 4.449684 | 435 | 435 | 5.052877 | 480 | 480 | 8.414967 | 648 | 648 | 8.659506 | 736 | 736 | 8.749033 |
| 19 | 53059075..53090427 | ZNF701 | 2.032614 | 6.55E-05 | 32 | 58 | 0.641798 | 16 | 60 | 0.669613 | 27 | 69 | 0.65734 | 32 | 83 | 1.193385 | 47 | 122 | 1.337116 | 48 | 128 | 1.247911 |
| 1 | 217600334..217804424 | GPATCH2 | 2.032596 | 2.84E-16 | 125 | 125 | 0.985596 | 145 | 145 | 1.153079 | 162 | 162 | 1.0997 | 204 | 204 | 2.090023 | 221 | 221 | 1.725918 | 304 | 304 | 2.111862 |
| 20 | 60963688..60982341 | CABLES2 | 2.032482 | 1.37E-11 | 86 | 86 | 1.582449 | 98 | 98 | 1.818694 | 119 | 119 | 1.885161 | 112 | 112 | 2.67782 | 176 | 176 | 3.20762 | 228 | 228 | 3.696317 |
| 11 | 118972908..118989252 | C2CD2L | 2.032481 | 3.05E-14 | 107 | 121 | 0.914607 | 97 | 105 | 0.800462 | 104 | 116 | 0.754879 | 137 | 144 | 1.414306 | 168 | 191 | 1.429951 | 217 | 237 | 1.578339 |
| 4 | 72053003..72437804 | SLC4A4 | 2.032393 | 3.32E-13 | 206 | 206 | 1.715956 | 289 | 289 | 2.427946 | 381 | 381 | 2.732337 | 373 | 373 | 4.037196 | 505 | 505 | 4.16648 | 594 | 594 | 4.359418 |
| 7 | 115850547..115898837 | TES | 2.03218 | 1.77E-17 | 138 | 228 | 3.710122 | 124 | 222 | 3.643415 | 186 | 304 | 4.258898 | 187 | 304 | 6.42775 | 257 | 481 | 7.752422 | 313 | 525 | 7.526894 |
| 7 | 99933727..99965454 | STAG3L5P-PVRIG | 2.031542 | 0.002587 | 17 | 50 | 0.912554 | 23 | 56 | 1.030811 | 11 | 41 | 0.644233 | 21 | 78 | 1.84976 | 24 | 75 | 1.355779 | 42 | 148 | 2.379872 |
| 7 | 23636998..23684327 | CCDC126 | 2.03153 | 5.68E-07 | 37 | 37 | 0.725889 | 29 | 29 | 0.573811 | 54 | 54 | 0.91208 | 64 | 64 | 1.631476 | 70 | 70 | 1.36021 | 67 | 67 | 1.158102 |
| 17 | 33558469..33569982 | RP11-799D4.4 | 2.030687 | 0.001984 | 19 | 19 | 0.470248 | 15 | 15 | 0.374427 | 15 | 15 | 0.319621 | 24 | 24 | 0.771821 | 24 | 24 | 0.588333 | 35 | 35 | 0.76321 |
| 3 | 183637722..183735803 | ABCC5 | 2.03067 | 1.9E-27 | 359 | 359 | 2.185383 | 427 | 427 | 2.621581 | 521 | 521 | 2.730494 | 615 | 615 | 4.864524 | 722 | 722 | 4.353207 | 854 | 854 | 4.580302 |
| 12 | 117581146..117628336 | FBXO21 | 2.028793 | 2.99E-27 | 472 | 472 | 5.874372 | 533 | 533 | 6.690352 | 706 | 706 | 7.564748 | 726 | 726 | 11.74054 | 1043 | 1043 | 12.85709 | 1107 | 1107 | 12.13864 |
| 22 | 51205929..51222091 | RABL2B | 2.02794 | 1.41E-07 | 84 | 233 | 2.76449 | 55 | 189 | 2.261638 | 65 | 228 | 2.328972 | 90 | 262 | 4.039172 | 103 | 353 | 4.148325 | 154 | 424 | 4.432288 |
| 11 | 129939732..130014699 | APLP2 | 2.027453 | 5.69E-79 | 11257 | 11516 | 107.7438 | 10873 | 11192 | 105.609 | 13797 | 14052 | 113.1877 | 16149 | 16380 | 199.13 | 21000 | 21362 | 197.9574 | 23215 | 23566 | 194.2584 |
| 2 | 32390933..32449448 | SLC30A6 | 2.026478 | 2.82E-19 | 147 | 147 | 1.900498 | 186 | 186 | 2.4253 | 185 | 185 | 2.05917 | 238 | 238 | 3.998151 | 313 | 314 | 4.020859 | 320 | 320 | 3.645048 |
| 20 | 35518632..35580246 | SAMHD1 | 2.025668 | 1.12E-22 | 284 | 723 | 9.657493 | 325 | 761 | 10.25211 | 402 | 908 | 10.44197 | 456 | 1003 | 17.40841 | 533 | 1281 | 16.94783 | 710 | 1545 | 18.18267 |
| 9 | 84198598..84304220 | TLE1 | 2.025353 | 6.34E-25 | 585 | 590 | 8.375709 | 561 | 578 | 8.275605 | 600 | 606 | 7.406492 | 712 | 720 | 13.2811 | 1056 | 1066 | 14.98876 | 1205 | 1221 | 15.27173 |
| 1 | 16174359..16266955 | SPEN | 2.023702 | 1.48E-51 | 1145 | 1161 | 6.082382 | 1091 | 1103 | 5.827997 | 1308 | 1316 | 5.935642 | 1568 | 1580 | 10.7555 | 2054 | 2074 | 10.76191 | 2347 | 2361 | 10.89784 |
| 10 | 120967101..121215131 | GRK5 | 2.022974 | 2.8E-29 | 592 | 592 | 13.98119 | 500 | 500 | 11.90953 | 614 | 614 | 12.48421 | 747 | 747 | 22.92319 | 990 | 990 | 23.15776 | 1142 | 1142 | 23.76247 |
| 16 | 3068446..3072384 | TNFRSF12A | 2.022969 | 6.79E-30 | 1417 | 1417 | 53.40292 | 1350 | 1350 | 51.31345 | 1393 | 1393 | 45.19773 | 1858 | 1858 | 90.98566 | 2489 | 2489 | 92.90927 | 2689 | 2689 | 89.28718 |
| 10 | 118430703..118502085 | HSPA12A | 2.022583 | 9.81E-27 | 293 | 348 | 3.58852 | 258 | 310 | 3.224038 | 367 | 462 | 4.101554 | 416 | 510 | 6.833423 | 514 | 654 | 6.679636 | 608 | 756 | 6.868486 |
| 1 | 53192126..53293014 | ZYG11B | 2.022492 | 2.46E-19 | 453 | 457 | 3.876299 | 586 | 587 | 5.021593 | 753 | 757 | 5.527991 | 795 | 799 | 8.806025 | 1071 | 1075 | 9.031264 | 1119 | 1122 | 8.384884 |
| 16 | 67757005..67840555 | RANBP10 | 2.01931 | 4.87E-19 | 273 | 273 | 2.97038 | 282 | 282 | 3.094573 | 420 | 420 | 3.934313 | 395 | 395 | 5.584425 | 582 | 582 | 6.272076 | 657 | 657 | 6.298219 |
| 3 | 172348039..172429008 | NCEH1 | 2.0189 | 1.7E-23 | 165 | 165 | 2.390103 | 183 | 183 | 2.673536 | 228 | 228 | 2.843399 | 259 | 259 | 4.874886 | 331 | 331 | 4.748973 | 374 | 374 | 4.773175 |
| 7 | 43966037..43995735 | UBE2D4 | 2.018716 | 2.15E-09 | 49 | 157 | 2.320061 | 42 | 171 | 2.548579 | 74 | 260 | 3.307831 | 74 | 194 | 3.725062 | 97 | 303 | 4.434874 | 105 | 339 | 4.413697 |
| 18 | 56806709..56826068 | SEC11C | 2.017904 | 1.63E-10 | 69 | 69 | 1.314438 | 71 | 71 | 1.364117 | 75 | 75 | 1.230049 | 93 | 93 | 2.302003 | 110 | 110 | 2.075499 | 159 | 159 | 2.668647 |
| 3 | 44379611..44450943 | TCAIM | 2.016718 | 1.29E-15 | 171 | 173 | 1.436602 | 242 | 245 | 2.051913 | 294 | 298 | 2.130478 | 324 | 331 | 3.571499 | 406 | 409 | 3.363975 | 445 | 454 | 3.321616 |
| 13 | 110406184..110438915 | IRS2 | 2.016072 | 2.18E-29 | 1714 | 1773 | 17.6429 | 1534 | 1616 | 16.21828 | 1689 | 1758 | 15.06088 | 2143 | 2214 | 28.62667 | 2896 | 3033 | 29.89321 | 3301 | 3431 | 30.08049 |
| 17 | 26691378..26728065 | SARM1 | 2.013875 | 5.68E-12 | 83 | 267 | 2.28671 | 64 | 256 | 2.211271 | 99 | 319 | 2.352127 | 120 | 372 | 4.139756 | 131 | 421 | 3.571255 | 159 | 522 | 3.938886 |
| 9 | 100666771..100684852 | C9orf156 | 2.012368 | 4.09E-11 | 86 | 86 | 1.595517 | 59 | 59 | 1.10397 | 113 | 113 | 1.804894 | 114 | 114 | 2.748146 | 144 | 144 | 2.646088 | 172 | 172 | 2.811476 |
| 19 | 3630181..3700477 | PIP5K1C | 2.011474 | 1.17E-37 | 2581 | 2581 | 26.85341 | 2431 | 2431 | 25.50931 | 2705 | 2705 | 24.22976 | 3315 | 3315 | 44.81537 | 4519 | 4519 | 46.56855 | 5163 | 5163 | 47.32784 |

| 2 | 99061317..99210853 | INPP4A | 2.010327 | 9.77E-35 | 392 | 392 | 2.067966 | 387 | 387 | 2.059068 | 501 | 501 | 2.27544 | 577 | 577 | 3.955171 | 708 | 708 | 3.699386 | 848 | 848 | 3.941453 |
| --- | --- | --- | --- | --- | --- | --- | --- | --- | --- | --- | --- | --- | --- | --- | --- | --- | --- | --- | --- | --- | --- | --- |
| 16 | 47111614..47177908 | NETO2 | 2.009983 | 6.18E-09 | 40 | 40 | 0.37239 | 58 | 58 | 0.544588 | 64 | 64 | 0.512965 | 74 | 74 | 0.895161 | 99 | 99 | 0.912876 | 97 | 97 | 0.795632 |
| 19 | 1905213..1926016 | SCAMP4 | 2.009058 | 1.7E-52 | 963 | 1198 | 16.08252 | 946 | 1194 | 16.16605 | 1139 | 1408 | 16.27309 | 1356 | 1648 | 28.7466 | 1802 | 2281 | 30.32923 | 1924 | 2472 | 29.23807 |
| 1 | 171810621..172387606 | DNM3 | 2.008923 | 9.02E-08 | 36 | 46 | 0.282366 | 47 | 54 | 0.334311 | 55 | 63 | 0.332939 | 54 | 74 | 0.590226 | 78 | 98 | 0.595826 | 99 | 134 | 0.724707 |
| 1 | 249200395..249214145 | PGBD2 | 2.008534 | 5.26E-06 | 29 | 29 | 0.535456 | 33 | 33 | 0.614528 | 45 | 45 | 0.715333 | 47 | 47 | 1.127601 | 76 | 76 | 1.389882 | 55 | 55 | 0.894728 |
| 12 | 15773092..16035263 | EPS8 | 2.008219 | 5.43E-39 | 688 | 688 | 7.728476 | 735 | 735 | 8.327125 | 902 | 902 | 8.72333 | 977 | 977 | 14.26041 | 1356 | 1356 | 15.08704 | 1554 | 1554 | 15.38011 |
| 6 | 101846664..102517958 | GRIK2 | 2.007752 | 8.69E-05 | 20 | 20 | 0.185921 | 23 | 23 | 0.21564 | 33 | 33 | 0.264109 | 45 | 45 | 0.543556 | 35 | 35 | 0.32226 | 46 | 46 | 0.376756 |
| 7 | 5085452..5109119 | RBAK | 2.00638 | 0.005386 | 12 | 172 | 1.721141 | 11 | 178 | 1.79643 | 20 | 234 | 2.015924 | 30 | 193 | 2.509443 | 20 | 249 | 2.467892 | 21 | 296 | 2.609653 |
| 18 | 32556892..32723434 | MAPRE2 | 2.005656 | 6.36E-42 | 614 | 614 | 6.919537 | 609 | 609 | 6.921947 | 749 | 749 | 7.267094 | 845 | 845 | 12.37364 | 1130 | 1130 | 12.61322 | 1317 | 1317 | 13.07668 |
| 9 | 131314866..131395941 | SPTAN1 | 2.004823 | 9.16E-51 | 12585 | 12585 | 79.63086 | 11691 | 11691 | 74.60744 | 13778 | 13778 | 75.05587 | 17033 | 17033 | 140.0398 | 21725 | 21725 | 136.1529 | 24738 | 24738 | 137.91 |
| 1 | 235613238..235667781 | B3GALNT2 | 2.004221 | 1.17E-19 | 174 | 174 | 2.124177 | 162 | 162 | 1.994614 | 191 | 191 | 2.007452 | 246 | 246 | 3.902192 | 279 | 279 | 3.373531 | 352 | 352 | 3.786058 |
| 12 | 48057070..48099844 | RPAP3 | 2.003964 | 3.42E-24 | 184 | 184 | 3.833351 | 199 | 199 | 4.181346 | 249 | 249 | 4.46612 | 283 | 283 | 7.66089 | 374 | 374 | 7.717406 | 392 | 392 | 7.195317 |
| 22 | 37406900..37415681 | TST | 2.002976 | 1.74E-20 | 213 | 213 | 7.746543 | 209 | 209 | 7.666144 | 275 | 275 | 8.61056 | 320 | 320 | 15.12204 | 433 | 433 | 15.59751 | 399 | 399 | 12.78511 |
| 7 | 938415..1015235 | COX19 | 2.002304 | 1.08E-16 | 137 | 137 | 1.721675 | 123 | 123 | 1.558971 | 160 | 160 | 1.731095 | 188 | 188 | 3.069874 | 220 | 220 | 2.738371 | 291 | 291 | 3.222009 |
| 1 | 8377886..8404227 | SLC45A1 | 2.000527 | 4.44E-11 | 92 | 92 | 2.218645 | 78 | 78 | 1.897129 | 77 | 77 | 1.598678 | 119 | 119 | 3.728885 | 133 | 133 | 3.176805 | 159 | 159 | 3.378315 |
| 19 | 40529291..40531409 | CTC-471F3.5 | 2.000343 | 0.011305 | 13 | 13 | 0.444041 | 7 | 7 | 0.241146 | 16 | 16 | 0.470511 | 18 | 18 | 0.798885 | 20 | 21 | 0.710458 | 22 | 22 | 0.662073 |

| Chromos ome | Region | Name | EDGE  test: NC vs JQ-1, tagwise dispersio ns - Fold  change | EDGE  test: NC vs JQ-1, tagwise dispersio ns - FDR p-value correctio  n | NC -  NC_Rep.1  -  Expressio  n values | NC -  NC_Rep.1  - Total exon  reads | NC -  NC_Rep.1  - RPKM | NC -  NC_Rep.2  -  Expressio  n values | NC -  NC_Rep.2  - Total exon  reads | NC -  NC_Rep.2  - RPKM | NC -  NC_Rep.3  -  Expressio  n values | NC -  NC_Rep.3  - Total exon  reads | NC -  NC_Rep.3  - RPKM | JQ-1 - JQ-  1_Rep.1 - Expressio  n values | JQ-1 - JQ-  1_Rep.1 - Total exon  reads | JQ-1 - JQ-  1_Rep.1 -  RPKM | JQ-1 - JQ-  1_Rep.2 - Expressio  n values | JQ-1 - JQ-  1_Rep.2 - Total exon  reads | JQ-1 - JQ-  1_Rep.2 -  RPKM | JQ-1 - JQ-  1_Rep.3 - Expressio  n values | JQ-1 - JQ-  1_Rep.3 - Total exon  reads | JQ-1 - JQ-  1_Rep.3 -  RPKM |
| --- | --- | --- | --- | --- | --- | --- | --- | --- | --- | --- | --- | --- | --- | --- | --- | --- | --- | --- | --- | --- | --- | --- |
| 7 | 30737601..30797218 | INMT | -678.691 | 8.72E-61 | 75 | 468 | 9.654739 | 95 | 418 | 8.697077 | 108 | 480 | 8.525233 | 0 | 1 | 0.026806 | 0 | 2 | 0.040866 | 0 | 0 | 0 |
| 9 | 95218487..95244788 | ASPN | -642.436 | 1.23E-51 | 65 | 92 | 2.576376 | 78 | 127 | 3.586967 | 122 | 170 | 4.098648 | 0 | 0 | 0 | 0 | 0 | 0 | 0 | 0 | 0 |
| 11 | 118032666..118047388 | SCN2B | -357.325 | 6.62E-35 | 50 | 50 | 0.597718 | 42 | 42 | 0.506382 | 54 | 54 | 0.555764 | 0 | 0 | 0 | 0 | 0 | 0 | 0 | 0 | 0 |
| 15 | 81071684..81244117 | KIAA1199 | -324.308 | 0 | 18358 | 31509 | 287.9518 | 18958 | 32618 | 300.6387 | 23242 | 39220 | 308.5767 | 50 | 76 | 0.902466 | 52 | 76 | 0.68792 | 52 | 75 | 0.603878 |
| 17 | 32612687..32615353 | CCL11 | -294.017 | 9.95E-29 | 39 | 39 | 2.517331 | 39 | 39 | 2.538883 | 42 | 42 | 2.33397 | 0 | 0 | 0 | 0 | 0 | 0 | 0 | 0 | 0 |
| 21 | 17442842..17999716 | LINC00478 | -281.382 | 2.05E-27 | 34 | 34 | 0.430383 | 35 | 35 | 0.446835 | 46 | 46 | 0.501308 | 0 | 0 | 0 | 0 | 0 | 0 | 0 | 0 | 0 |
| 10 | 4243333..4286104 | LINC00702 | -269.043 | 6.36E-26 | 35 | 35 | 0.359265 | 29 | 29 | 0.300226 | 46 | 46 | 0.406514 | 0 | 0 | 0 | 0 | 0 | 0 | 0 | 0 | 0 |
| 7 | 149597..155465 | AC093627.10 | -256.989 | 6.07E-25 | 28 | 28 | 0.378732 | 35 | 35 | 0.477468 | 42 | 42 | 0.489096 | 0 | 0 | 0 | 0 | 0 | 0 | 0 | 0 | 0 |
| 8 | 122624356..122653630 | HAS2 | -242.603 | 6.9E-158 | 515 | 560 | 9.308316 | 708 | 758 | 12.70734 | 954 | 1036 | 14.82563 | 4 | 4 | 0.086392 | 2 | 3 | 0.04939 | 1 | 1 | 0.014645 |
| 17 | 7608520..7614696 | EFNB3 | -239.043 | 5.69E-20 | 45 | 45 | 0.972712 | 22 | 22 | 0.479619 | 30 | 30 | 0.558294 | 0 | 0 | 0 | 0 | 0 | 0 | 0 | 0 | 0 |
| 18 | 43304092..43332485 | SLC14A1 | -232.003 | 9.2E-22 | 21 | 25 | 0.273079 | 30 | 34 | 0.374567 | 44 | 44 | 0.413782 | 0 | 0 | 0 | 0 | 0 | 0 | 0 | 0 | 0 |
| 15 | 77285700..77329673 | PSTPIP1 | -180.251 | 2.32E-16 | 31 | 31 | 0.483221 | 25 | 25 | 0.393031 | 17 | 17 | 0.228141 | 0 | 0 | 0 | 0 | 0 | 0 | 0 | 0 | 0 |
| 15 | 65345679..65369028 | RASL12 | -175.416 | 3.9E-224 | 675 | 675 | 16.8017 | 573 | 573 | 14.38488 | 725 | 725 | 15.53666 | 4 | 4 | 0.129372 | 4 | 4 | 0.098616 | 1 | 1 | 0.021931 |
| 17 | 4487294..4511614 | SMTNL2 | -170.24 | 7.45E-16 | 27 | 27 | 0.761314 | 26 | 26 | 0.739394 | 16 | 16 | 0.38841 | 0 | 0 | 0 | 0 | 0 | 0 | 0 | 0 | 0 |
| 16 | 29823177..29827201 | PRRT2 | -149.972 | 2.81E-14 | 21 | 218 | 4.575908 | 20 | 196 | 4.149341 | 20 | 195 | 3.523917 | 0 | 13 | 0.354565 | 0 | 34 | 0.706869 | 0 | 35 | 0.64728 |
| 2 | 177494317..177502659 | LINC01116 | -144.871 | 1.84E-13 | 20 | 21 | 0.820286 | 15 | 16 | 0.63033 | 24 | 26 | 0.874358 | 0 | 0 | 0 | 0 | 0 | 0 | 0 | 0 | 0 |
| 2 | 231972944..231989832 | HTR2B | -144.533 | 2.59E-13 | 13 | 83 | 2.573745 | 17 | 90 | 2.814701 | 29 | 122 | 3.256998 | 0 | 3 | 0.120876 | 0 | 0 | 0 | 0 | 0 | 0 |
| 19 | 54976210..54984411 | CDC42EP5 | -139.858 | 7.5E-170 | 558 | 558 | 43.03716 | 506 | 506 | 39.36065 | 494 | 494 | 32.80248 | 2 | 2 | 0.200434 | 3 | 3 | 0.229176 | 4 | 4 | 0.271814 |
| 8 | 124864227..125132302 | FER1L6 | -137.672 | 6.11E-13 | 16 | 18 | 0.206938 | 20 | 23 | 0.266685 | 20 | 24 | 0.237547 | 0 | 0 | 0 | 0 | 0 | 0 | 0 | 0 | 0 |
| 3 | 30767692..30936257 | GADL1 | -133.359 | 4.49E-43 | 48 | 48 | 0.456073 | 75 | 75 | 0.718715 | 93 | 93 | 0.760758 | 0 | 0 | 0 | 1 | 1 | 0.009411 | 0 | 0 | 0 |
| 1 | 46713360..46744145 | RAD54L | -122.947 | 2.54E-11 | 17 | 21 | 0.455345 | 13 | 19 | 0.415506 | 20 | 23 | 0.429358 | 0 | 0 | 0 | 0 | 0 | 0 | 0 | 0 | 0 |
| 8 | 134203282..134242587 | WISP1 | -119.615 | 1.25E-71 | 93 | 99 | 1.793696 | 117 | 136 | 2.485164 | 127 | 134 | 2.090205 | 1 | 1 | 0.023542 | 0 | 1 | 0.017945 | 1 | 1 | 0.015963 |
| 22 | 50919985..50924869 | ADM2 | -116.593 | 3.04E-42 | 65 | 65 | 1.0587 | 49 | 49 | 0.804929 | 74 | 74 | 1.037675 | 0 | 0 | 0 | 1 | 1 | 0.016132 | 0 | 0 | 0 |
| 1 | 171154347..171181822 | FMO2 | -110.762 | 5.6E-142 | 214 | 433 | 4.833593 | 221 | 462 | 5.201474 | 278 | 583 | 5.603005 | 1 | 2 | 0.02901 | 1 | 2 | 0.022113 | 3 | 8 | 0.078682 |
| 9 | 117546915..117568406 | TNFSF15 | -110.6 | 4.24E-11 | 7 | 7 | 0.061798 | 18 | 18 | 0.160269 | 20 | 20 | 0.152011 | 0 | 0 | 0 | 0 | 0 | 0 | 0 | 0 | 0 |
| 20 | 34021145..34042568 | GDF5 | -107.196 | 3.5E-130 | 295 | 576 | 15.16107 | 234 | 547 | 14.52101 | 287 | 609 | 13.8005 | 2 | 2 | 0.068402 | 2 | 5 | 0.130352 | 2 | 3 | 0.069572 |
| 4 | 100226121..100242558 | ADH1B | -103.914 | 4.4E-127 | 1632 | 1747 | 18.76783 | 1771 | 1875 | 20.31537 | 2039 | 2119 | 19.59848 | 17 | 17 | 0.237302 | 20 | 22 | 0.23409 | 6 | 7 | 0.066256 |
| 7 | 102123791..102184211 | RP11-514P8.8 | -103.734 | 1.27E-10 | 15 | 33 | 0.643968 | 17 | 54 | 1.062788 | 10 | 41 | 0.688818 | 0 | 1 | 0.025356 | 0 | 0 | 0 | 0 | 0 | 0 |
| 6 | 136552162..136571473 | MTFR2 | -103.293 | 1.18E-10 | 9 | 9 | 0.255843 | 13 | 13 | 0.372715 | 20 | 20 | 0.489476 | 0 | 0 | 0 | 0 | 0 | 0 | 0 | 0 | 0 |
| 1 | 111729796..111747157 | DENND2D | -102.382 | 7.13E-38 | 47 | 48 | 0.606168 | 54 | 54 | 0.687777 | 64 | 65 | 0.7067 | 0 | 0 | 0 | 1 | 1 | 0.012508 | 0 | 0 | 0 |
| 6 | 118869461..118881893 | PLN | -101.04 | 2.24E-10 | 9 | 54 | 1.879506 | 17 | 82 | 2.8785 | 15 | 87 | 2.606992 | 0 | 1 | 0.045225 | 0 | 1 | 0.034474 | 0 | 1 | 0.030666 |
| 5 | 35048861..35230794 | PRLR | -98.3155 | 4.73E-10 | 8 | 8 | 0.042184 | 11 | 11 | 0.0585 | 21 | 21 | 0.095334 | 0 | 0 | 0 | 0 | 0 | 0 | 0 | 0 | 0 |
| 1 | 20354672..20417683 | PLA2G5 | -98.1617 | 2.87E-36 | 49 | 49 | 1.309038 | 54 | 54 | 1.454964 | 55 | 55 | 1.264996 | 1 | 1 | 0.034713 | 0 | 0 | 0 | 0 | 0 | 0 |
| 2 | 99797542..99814089 | MRPL30_2 | -94.8284 | 7.87E-05 | 1 | 13 | 0.347429 | 33 | 116 | 3.126677 | 3 | 4 | 0.092035 | 0 | 0 | 0 | 0 | 0 | 0 | 0 | 0 | 0 |
| 11 | 111783460..111797595 | HSPB2-C11orf52 | -93.9 | 1.74E-09 | 10 | 94 | 3.181117 | 18 | 86 | 2.9353 | 10 | 74 | 2.156025 | 0 | 0 | 0 | 0 | 1 | 0.033519 | 0 | 3 | 0.089449 |
| 3 | 177534653..177617012 | RP11-91K9.1 | -93.6827 | 1.43E-09 | 9 | 9 | 0.208591 | 14 | 14 | 0.327253 | 15 | 15 | 0.299305 | 0 | 0 | 0 | 0 | 0 | 0 | 0 | 0 | 0 |
| 8 | 27667137..27695612 | PBK | -91.4221 | 2.53E-27 | 38 | 42 | 1.351103 | 36 | 45 | 1.460004 | 75 | 84 | 2.326424 | 1 | 1 | 0.0418 | 0 | 0 | 0 | 0 | 1 | 0.028343 |
| X | 16141679..16171144 | GRPR | -91.2697 | 2.63E-09 | 11 | 11 | 0.397153 | 12 | 12 | 0.436967 | 14 | 14 | 0.435174 | 0 | 0 | 0 | 0 | 0 | 0 | 0 | 0 | 0 |
| 1 | 23832922..23857712 | E2F2 | -91.1517 | 3.17E-09 | 14 | 14 | 0.178678 | 6 | 6 | 0.077232 | 17 | 17 | 0.186794 | 0 | 0 | 0 | 0 | 0 | 0 | 0 | 0 | 0 |
| 9 | 86890372..86955672 | SLC28A3 | -90.9718 | 3.46E-09 | 6 | 6 | 0.081346 | 11 | 11 | 0.150412 | 20 | 20 | 0.233447 | 0 | 0 | 0 | 0 | 0 | 0 | 0 | 0 | 0 |

| X | 111017543..111326004 | TRPC5 | -89.7956 | 1.13E-08 | 19 | 19 | 0.226627 | 12 | 12 | 0.144358 | 5 | 5 | 0.051345 | 0 | 0 | 0 | 0 | 0 | 0 | 0 | 0 | 0 |
| --- | --- | --- | --- | --- | --- | --- | --- | --- | --- | --- | --- | --- | --- | --- | --- | --- | --- | --- | --- | --- | --- | --- |
| 7 | 73149368..73150384 | LINC00035 | -86.5015 | 5.25E-09 | 13 | 13 | 1.622581 | 12 | 12 | 1.51059 | 10 | 10 | 1.074566 | 0 | 0 | 0 | 0 | 0 | 0 | 0 | 0 | 0 |
| 1 | 101185298..101204601 | VCAM1 | -86.3969 | 9.62E-09 | 10 | 10 | 0.224593 | 12 | 12 | 0.271818 | 13 | 13 | 0.251367 | 0 | 0 | 0 | 0 | 0 | 0 | 0 | 0 | 0 |
| 15 | 65369154..65372276 | KBTBD13 | -86.3717 | 1.04E-08 | 14 | 14 | 0.312215 | 7 | 7 | 0.157444 | 14 | 14 | 0.268796 | 0 | 0 | 0 | 0 | 0 | 0 | 0 | 0 | 0 |
| 5 | 131409483..131411859 | CSF2 | -81.6965 | 2.45E-08 | 17 | 17 | 1.512113 | 7 | 7 | 0.627965 | 9 | 9 | 0.689205 | 0 | 0 | 0 | 0 | 0 | 0 | 0 | 0 | 0 |
| 10 | 48425815..48438976 | GDF10 | -80.5305 | 0 | 3464 | 3464 | 98.15064 | 3109 | 3109 | 88.84609 | 3406 | 3406 | 83.08645 | 33 | 33 | 1.214958 | 26 | 26 | 0.729672 | 44 | 44 | 1.098427 |
| 7 | 1727755..1787590 | ELFN1 | -79.6745 | 5.69E-29 | 38 | 38 | 0.68831 | 48 | 48 | 0.876888 | 42 | 42 | 0.654968 | 0 | 0 | 0 | 0 | 0 | 0 | 1 | 1 | 0.015959 |
| 17 | 56378592..56406152 | BZRAP1 | -79.2059 | 1.96E-64 | 116 | 116 | 0.92553 | 96 | 96 | 0.772514 | 105 | 105 | 0.721261 | 0 | 0 | 0 | 1 | 1 | 0.007903 | 2 | 2 | 0.014059 |
| 6 | 31976391..31980249 | TNXA | -78.9817 | 6.91E-08 | 10 | 21 | 0.717649 | 7 | 11 | 0.37913 | 15 | 28 | 0.823799 | 0 | 0 | 0 | 0 | 0 | 0 | 0 | 0 | 0 |
| 19 | 54597933..54606000 | OSCAR | -78.9785 | 7.09E-08 | 11 | 11 | 0.370279 | 6 | 6 | 0.2037 | 15 | 15 | 0.434709 | 0 | 0 | 0 | 0 | 0 | 0 | 0 | 0 | 0 |
| 1 | 86889769..86922241 | CLCA2 | -78.8039 | 9.18E-29 | 35 | 35 | 0.542174 | 39 | 39 | 0.609309 | 53 | 53 | 0.706833 | 0 | 0 | 0 | 0 | 0 | 0 | 1 | 1 | 0.013648 |
| 15 | 65673802..65715410 | IGDCC4 | -77.4037 | 1.23E-66 | 102 | 102 | 0.91498 | 99 | 99 | 0.895672 | 110 | 110 | 0.849522 | 3 | 3 | 0.034968 | 0 | 0 | 0 | 0 | 0 | 0 |
| 1 | 17300997..17307330 | MFAP2 | -75.2062 | 6.6E-146 | 454 | 589 | 14.07258 | 459 | 611 | 14.7232 | 470 | 659 | 13.55546 | 4 | 5 | 0.155225 | 5 | 7 | 0.165652 | 6 | 8 | 0.168404 |
| 2 | 166095912..166248818 | SCN2A | -74.6115 | 6.25E-61 | 88 | 91 | 0.513681 | 132 | 136 | 0.774272 | 173 | 177 | 0.860193 | 1 | 1 | 0.007335 | 1 | 1 | 0.005591 | 2 | 2 | 0.009947 |
| 6 | 151977826..152450754 | ESR1 | -74.542 | 3.14E-07 | 5 | 8 | 0.040881 | 18 | 22 | 0.113386 | 7 | 9 | 0.039596 | 0 | 0 | 0 | 0 | 0 | 0 | 0 | 1 | 0.004502 |
| 14 | 102018558..102026768 | DIO3OS | -74.2294 | 1.28E-07 | 9 | 9 | 0.12924 | 11 | 11 | 0.159313 | 10 | 10 | 0.123631 | 0 | 0 | 0 | 0 | 0 | 0 | 0 | 0 | 0 |
| 8 | 15965387..16424999 | MSR1 | -74.2289 | 1.3E-07 | 8 | 8 | 0.071322 | 12 | 12 | 0.107899 | 10 | 10 | 0.076755 | 0 | 0 | 0 | 0 | 0 | 0 | 0 | 0 | 0 |
| 11 | 133902167..133916744 | RP11-713P17.3 | -74.1661 | 1.33E-07 | 6 | 6 | 0.10364 | 12 | 12 | 0.209055 | 12 | 12 | 0.178455 | 0 | 0 | 0 | 0 | 0 | 0 | 0 | 0 | 0 |
| 5 | 35852797..35879705 | IL7R | -73.5548 | 1.9E-157 | 368 | 368 | 4.229337 | 498 | 498 | 5.772397 | 593 | 593 | 5.867452 | 7 | 7 | 0.104533 | 4 | 4 | 0.045533 | 5 | 5 | 0.050629 |
| 1 | 160085549..160113381 | ATP1A2 | -71.933 | 2.69E-07 | 13 | 13 | 0.14376 | 10 | 10 | 0.111531 | 6 | 6 | 0.057124 | 0 | 0 | 0 | 0 | 0 | 0 | 0 | 0 | 0 |
| 16 | 29228491..29231352 | RP11-426C22.4 | -70.1374 | 2.18E-25 | 32 | 70 | 2.322644 | 33 | 61 | 2.041347 | 48 | 73 | 2.085345 | 0 | 1 | 0.043114 | 0 | 1 | 0.032864 | 1 | 1 | 0.029234 |
| 15 | 85783703..85790410 | GOLGA6L3 | -69.642 | 6.32E-07 | 9 | 50 | 2.062978 | 15 | 52 | 2.163866 | 4 | 15 | 0.532827 | 0 | 0 | 0 | 0 | 0 | 0 | 0 | 0 | 0 |
| 20 | 44441215..44445596 | UBE2C | -69.1366 | 1.37E-41 | 48 | 48 | 2.037182 | 65 | 65 | 2.782302 | 82 | 82 | 2.996213 | 0 | 0 | 0 | 1 | 1 | 0.042037 | 1 | 1 | 0.037393 |
| 17 | 43002077..43025082 | KIF18B | -66.234 | 1.62E-36 | 68 | 68 | 1.016732 | 66 | 67 | 1.010357 | 51 | 51 | 0.656505 | 1 | 1 | 0.019428 | 1 | 1 | 0.014809 | 0 | 0 | 0 |
| 11 | 120382468..120859613 | GRIK4 | -63.8971 | 4.62E-52 | 64 | 64 | 0.600641 | 84 | 86 | 0.814021 | 110 | 110 | 0.888787 | 2 | 2 | 0.024389 | 1 | 1 | 0.009296 | 0 | 0 | 0 |
| 16 | 84328252..84363450 | WFDC1 | -63.3426 | 6.4E-137 | 271 | 271 | 3.918229 | 245 | 245 | 3.572637 | 271 | 271 | 3.37334 | 5 | 5 | 0.093934 | 3 | 3 | 0.042962 | 2 | 2 | 0.025477 |
| 15 | 65337708..65345734 | SLC51B | -62.0356 | 5.44E-22 | 24 | 24 | 1.7782 | 31 | 31 | 2.316505 | 45 | 45 | 2.870464 | 0 | 0 | 0 | 0 | 0 | 0 | 1 | 1 | 0.065279 |
| 1 | 9242263..9252148 | RP3-510D11.2 | -61.927 | 3.26E-06 | 6 | 26 | 1.838376 | 7 | 24 | 1.71149 | 12 | 35 | 2.130587 | 0 | 0 | 0 | 0 | 0 | 0 | 0 | 0 | 0 |
| 8 | 21971928..21990897 | HR | -61.2814 | 5.1E-283 | 1735 | 1735 | 13.75638 | 1442 | 1442 | 11.53114 | 1683 | 1683 | 11.48839 | 14 | 14 | 0.144233 | 25 | 25 | 0.196329 | 27 | 27 | 0.188613 |
| 8 | 122651533..122656933 | HAS2-AS1 | -60.9118 | 8.14E-38 | 53 | 61 | 2.365487 | 61 | 68 | 2.659512 | 57 | 68 | 2.270231 | 0 | 0 | 0 | 1 | 1 | 0.038409 | 1 | 1 | 0.034166 |
| X | 15363713..15402498 | FIGF | -60.4034 | 1.03E-24 | 33 | 33 | 1.067498 | 77 | 77 | 2.512153 | 59 | 59 | 1.643143 | 0 | 0 | 0 | 0 | 0 | 0 | 2 | 2 | 0.057001 |
| 1 | 31838472..31849697 | FABP3 | -59.7838 | 1.19E-94 | 1728 | 1728 | 117.2988 | 1822 | 1822 | 124.7385 | 2163 | 2163 | 126.4086 | 17 | 17 | 1.499446 | 33 | 33 | 2.218721 | 29 | 29 | 1.734406 |
| 11 | 68474908..68519032 | MTL5 | -59.5605 | 6.24E-06 | 10 | 10 | 0.1194 | 5 | 5 | 0.060211 | 9 | 9 | 0.092516 | 0 | 0 | 0 | 0 | 0 | 0 | 0 | 0 | 0 |
| 3 | 132316081..132337811 | ACKR4 | -59.4456 | 6.36E-06 | 6 | 104 | 3.186626 | 5 | 103 | 3.183004 | 13 | 139 | 3.666763 | 0 | 2 | 0.079627 | 0 | 3 | 0.091045 | 0 | 1 | 0.026996 |
| 21 | 33664124..33687095 | MRAP | -59.4381 | 6.42E-06 | 4 | 6 | 0.310458 | 7 | 9 | 0.469674 | 13 | 16 | 0.712758 | 0 | 0 | 0 | 0 | 1 | 0.05125 | 0 | 0 | 0 |
| 15 | 55647446..55790558 | DYX1C1-CCPG1 | -59.238 | 8E-05 | 13 | 32 | 0.485656 | 0 | 1 | 0.015307 | 11 | 54 | 0.705575 | 0 | 0 | 0 | 0 | 0 | 0 | 0 | 0 | 0 |
| 11 | 26210829..26684835 | ANO3 | -59.2327 | 7.78E-06 | 5 | 5 | 0.044939 | 3 | 3 | 0.027194 | 16 | 16 | 0.123806 | 0 | 0 | 0 | 0 | 0 | 0 | 0 | 0 | 0 |
| 1 | 3689352..3692546 | SMIM1 | -57.2149 | 6.44E-06 | 7 | 7 | 0.51103 | 11 | 11 | 0.809923 | 5 | 5 | 0.31426 | 0 | 0 | 0 | 0 | 0 | 0 | 0 | 0 | 0 |
| 10 | 112836790..112840658 | ADRA2A | -57.0709 | 1.23E-05 | 3 | 3 | 0.054003 | 10 | 10 | 0.181552 | 10 | 10 | 0.154978 | 0 | 0 | 0 | 0 | 0 | 0 | 0 | 0 | 0 |
| 3 | 58490863..58523046 | ACOX2 | -55.7101 | 2.7E-130 | 210 | 210 | 3.790021 | 205 | 205 | 3.731458 | 280 | 280 | 4.350616 | 1 | 1 | 0.023451 | 5 | 5 | 0.089378 | 4 | 4 | 0.063604 |
| 20 | 49202645..49308065 | FAM65C | -54.6625 | 8.2E-123 | 342 | 342 | 3.963885 | 293 | 293 | 3.425034 | 304 | 304 | 3.033464 | 7 | 7 | 0.10542 | 1 | 1 | 0.01148 | 6 | 6 | 0.06127 |
| X | 43808022..43832750 | NDP | -54.6309 | 2.26E-05 | 4 | 5 | 0.189979 | 8 | 10 | 0.38321 | 10 | 13 | 0.425254 | 0 | 0 | 0 | 0 | 0 | 0 | 0 | 1 | 0.033476 |
| 11 | 10594638..10715535 | MRVI1 | -54.2294 | 6.4E-252 | 1492 | 2512 | 22.71503 | 1365 | 2488 | 22.69062 | 1612 | 3081 | 23.98588 | 27 | 51 | 0.599233 | 18 | 37 | 0.331386 | 23 | 55 | 0.438187 |
| 11 | 71825915..71850936 | FOLR3 | -52.3038 | 2.26E-05 | 8 | 8 | 0.399691 | 8 | 8 | 0.403113 | 5 | 5 | 0.215067 | 0 | 0 | 0 | 0 | 0 | 0 | 0 | 0 | 0 |
| 9 | 116413236..116445135 | RP11-18B16.2 | -52.2776 | 2.24E-05 | 7 | 7 | 0.398629 | 8 | 8 | 0.459476 | 6 | 6 | 0.294166 | 0 | 0 | 0 | 0 | 0 | 0 | 0 | 0 | 0 |
| X | 22050559..22269427 | PHEX | -51.7325 | 2.52E-39 | 56 | 56 | 0.546857 | 60 | 60 | 0.590935 | 93 | 93 | 0.781878 | 3 | 3 | 0.038066 | 0 | 0 | 0 | 0 | 0 | 0 |
| 9 | 95146249..95166978 | OGN | -50.9974 | 4.43E-18 | 27 | 39 | 0.817886 | 21 | 35 | 0.740284 | 34 | 56 | 1.011083 | 0 | 2 | 0.054499 | 0 | 0 | 0 | 1 | 1 | 0.018477 |
| 5 | 152869175..153193429 | GRIA1 | -50.909 | 6.8E-113 | 168 | 168 | 1.532288 | 185 | 185 | 1.701787 | 220 | 220 | 1.727525 | 3 | 3 | 0.035554 | 2 | 2 | 0.018068 | 4 | 4 | 0.032144 |
| 6 | 78171948..78173490 | HTR1B | -49.9786 | 4.78E-05 | 7 | 7 | 0.315958 | 11 | 11 | 0.500756 | 2 | 2 | 0.07772 | 0 | 0 | 0 | 0 | 0 | 0 | 0 | 0 | 0 |

| 2 | 162929766..162931679 | AC008063.2 | -49.9188 | 4.52E-05 | 7 | 8 | 0.870577 | 10 | 15 | 1.646307 | 3 | 4 | 0.374755 | 0 | 0 | 0 | 0 | 0 | 0 | 0 | 0 | 0 |
| --- | --- | --- | --- | --- | --- | --- | --- | --- | --- | --- | --- | --- | --- | --- | --- | --- | --- | --- | --- | --- | --- | --- |
| 19 | 8645126..8675620 | ADAMTS10 | -49.8409 | 8.8E-100 | 162 | 162 | 1.965966 | 160 | 160 | 1.958318 | 178 | 178 | 1.859736 | 3 | 3 | 0.047306 | 4 | 4 | 0.048079 | 1 | 1 | 0.010692 |
| 11 | 74407474..74442430 | CHRDL2 | -49.834 | 4.33E-05 | 9 | 9 | 0.203975 | 5 | 5 | 0.11429 | 6 | 6 | 0.117073 | 0 | 0 | 0 | 0 | 0 | 0 | 0 | 0 | 0 |
| 16 | 30215637..30220392 | RP11-347C12.3 | -49.7659 | 8.18E-05 | 7 | 75 | 1.929613 | 4 | 56 | 1.453112 | 9 | 82 | 1.816323 | 0 | 4 | 0.133721 | 0 | 3 | 0.076449 | 0 | 3 | 0.068004 |
| 4 | 71494461..71552533 | ENAM | -49.7659 | 8.18E-05 | 7 | 7 | 0.074751 | 4 | 4 | 0.04308 | 9 | 9 | 0.082743 | 0 | 0 | 0 | 0 | 0 | 0 | 0 | 0 | 0 |
| 15 | 66839517..66858317 | LCTL | -49.7643 | 8.13E-05 | 5 | 8 | 0.158377 | 6 | 8 | 0.159733 | 9 | 13 | 0.221572 | 0 | 0 | 0 | 0 | 2 | 0.039217 | 0 | 0 | 0 |
| 5 | 149599054..149669854 | CAMK2A | -49.2708 | 1.71E-17 | 29 | 68 | 0.770071 | 26 | 74 | 0.845193 | 24 | 87 | 0.848226 | 0 | 4 | 0.058859 | 1 | 1 | 0.011217 | 0 | 1 | 0.009978 |
| 17 | 29599031..29624557 | OMG | -47.9716 | 3.15E-28 | 39 | 141 | 3.483543 | 41 | 147 | 3.662872 | 55 | 209 | 4.44548 | 0 | 5 | 0.160511 | 2 | 3 | 0.073411 | 0 | 3 | 0.065302 |
| 19 | 49141199..49149569 | CA11 | -47.6623 | 1.58E-30 | 36 | 81 | 2.718717 | 46 | 111 | 3.757546 | 52 | 94 | 2.716297 | 0 | 1 | 0.043613 | 0 | 0 | 0 | 2 | 3 | 0.088716 |
| 4 | 100197524..100212185 | ADH1A | -47.4764 | 8.84E-05 | 5 | 14 | 0.431818 | 11 | 16 | 0.497732 | 3 | 13 | 0.345213 | 0 | 0 | 0 | 0 | 2 | 0.0611 | 0 | 0 | 0 |
| 19 | 47123725..47128375 | PTGIR | -47.4563 | 3.5E-181 | 342 | 342 | 9.573547 | 328 | 328 | 9.260254 | 376 | 376 | 9.061601 | 3 | 3 | 0.109119 | 9 | 9 | 0.249533 | 6 | 6 | 0.147979 |
| 18 | 3496030..4455335 | DLGAP1 | -47.3624 | 8.21E-05 | 8 | 8 | 0.046013 | 4 | 4 | 0.023203 | 7 | 7 | 0.034662 | 0 | 0 | 0 | 0 | 1 | 0.005697 | 0 | 1 | 0.005067 |
| 19 | 46800303..46846690 | HIF3A | -47.3407 | 8.29E-05 | 8 | 10 | 0.083199 | 3 | 3 | 0.025173 | 8 | 8 | 0.057303 | 0 | 0 | 0 | 0 | 0 | 0 | 0 | 0 | 0 |
| 1 | 20512578..20522541 | UBXN10 | -47.3398 | 8.13E-05 | 6 | 6 | 0.075009 | 5 | 5 | 0.063043 | 8 | 8 | 0.086104 | 0 | 0 | 0 | 0 | 0 | 0 | 0 | 0 | 0 |
| 9 | 80037995..80263223 | GNA14 | -47.3336 | 0.000158 | 3 | 3 | 0.076787 | 8 | 8 | 0.206519 | 8 | 8 | 0.17629 | 0 | 0 | 0 | 0 | 0 | 0 | 0 | 0 | 0 |
| 17 | 56402811..56493127 | BZRAP1-AS1 | -47.3121 | 0.000157 | 3 | 17 | 0.328793 | 7 | 24 | 0.468153 | 9 | 25 | 0.416279 | 0 | 0 | 0 | 0 | 2 | 0.038313 | 0 | 2 | 0.034081 |
| 2 | 165752696..165812035 | SLC38A11 | -47.2939 | 0.000157 | 5 | 5 | 0.062722 | 4 | 4 | 0.050607 | 10 | 10 | 0.107999 | 0 | 0 | 0 | 0 | 0 | 0 | 0 | 0 | 0 |
| 7 | 142498725..142500432 | TRBC2 | -47.2811 | 0.000161 | 2 | 2 | 0.183763 | 7 | 7 | 0.648677 | 10 | 10 | 0.79104 | 0 | 0 | 0 | 0 | 0 | 0 | 0 | 0 | 0 |
| 1 | 211836114..211848960 | NEK2 | -47.1246 | 7.12E-24 | 35 | 35 | 0.805291 | 58 | 58 | 1.345907 | 39 | 40 | 0.792346 | 2 | 2 | 0.059793 | 0 | 0 | 0 | 0 | 0 | 0 |
| 19 | 851014..856242 | ELANE | -46.1194 | 3.46E-16 | 20 | 20 | 1.361606 | 29 | 29 | 1.991232 | 25 | 25 | 1.465318 | 0 | 0 | 0 | 1 | 1 | 0.067431 | 0 | 0 | 0 |
| 11 | 111782966..111789574 | HSPB2 | -46.0985 | 4.55E-16 | 23 | 230 | 10.62242 | 24 | 216 | 10.06125 | 27 | 251 | 9.980214 | 0 | 0 | 0 | 0 | 4 | 0.182976 | 1 | 5 | 0.203455 |
| X | 9754496..9917483 | SHROOM2 | -45.6855 | 3.25E-27 | 41 | 41 | 0.345994 | 49 | 49 | 0.417046 | 38 | 38 | 0.276083 | 1 | 1 | 0.010965 | 0 | 0 | 0 | 1 | 1 | 0.007435 |
| 17 | 7452416..7464918 | TNFSF12-TNFSF1 | -45.1767 | 0.000181 | 8 | 20 | 0.767028 | 10 | 40 | 1.54719 | 0 | 0 | 0 | 0 | 3 | 0.149498 | 0 | 0 | 0 | 0 | 0 | 0 |
| 1 | 9095166..9148537 | SLC2A5 | -44.9152 | 0.000158 | 8 | 8 | 0.081291 | 3 | 3 | 0.030745 | 7 | 7 | 0.061238 | 0 | 0 | 0 | 0 | 0 | 0 | 0 | 0 | 0 |
| 17 | 66970629..67057205 | ABCA9 | -44.8744 | 3.52E-53 | 111 | 111 | 0.845905 | 77 | 79 | 0.607195 | 99 | 99 | 0.649537 | 0 | 0 | 0 | 2 | 2 | 0.015096 | 3 | 3 | 0.020143 |
| 11 | 19245610..19263167 | E2F8 | -44.867 | 0.0003 | 3 | 11 | 0.18505 | 6 | 13 | 0.220568 | 9 | 18 | 0.260699 | 0 | 0 | 0 | 0 | 0 | 0 | 0 | 0 | 0 |
| 15 | 83776159..83813606 | TM6SF1 | -44.8428 | 0.000302 | 3 | 8 | 0.208365 | 5 | 18 | 0.472836 | 10 | 26 | 0.583015 | 0 | 3 | 0.101529 | 0 | 7 | 0.180581 | 0 | 7 | 0.160634 |
| 20 | 54987168..55034396 | CASS4 | -44.2598 | 1.4E-167 | 719 | 719 | 12.44114 | 678 | 678 | 11.83214 | 807 | 807 | 12.02196 | 12 | 12 | 0.269802 | 21 | 21 | 0.359906 | 8 | 8 | 0.121962 |
| 13 | 24463028..24471402 | C1QTNF9B-AS1 | -43.9419 | 1.65E-35 | 39 | 162 | 8.672311 | 62 | 204 | 11.01418 | 76 | 223 | 10.27768 | 0 | 0 | 0 | 1 | 3 | 0.159067 | 2 | 7 | 0.330157 |
| 17 | 37219556..37310647 | PLXDC1 | -43.4446 | 1.34E-26 | 40 | 64 | 0.480474 | 39 | 69 | 0.522445 | 43 | 60 | 0.387803 | 0 | 1 | 0.009755 | 2 | 2 | 0.014872 | 0 | 0 | 0 |
| 3 | 8792094..8811314 | OXTR | -43.0839 | 1.27E-14 | 30 | 105 | 1.620037 | 17 | 93 | 1.447174 | 22 | 112 | 1.487729 | 0 | 5 | 0.100239 | 0 | 5 | 0.076409 | 1 | 8 | 0.10875 |
| 17 | 62461569..62464760 | MILR1 | -43.0529 | 6.28E-15 | 23 | 24 | 1.816856 | 25 | 25 | 1.908761 | 21 | 21 | 1.368671 | 0 | 0 | 0 | 1 | 1 | 0.07498 | 0 | 0 | 0 |
| 16 | 27413483..27462115 | IL21R | -43.0215 | 6.04E-15 | 20 | 53 | 0.87491 | 26 | 69 | 1.148786 | 23 | 55 | 0.781665 | 0 | 1 | 0.02145 | 1 | 3 | 0.049051 | 0 | 1 | 0.014544 |
| 16 | 616996..619495 | NHLRC4 | -42.7284 | 0.000386 | 12 | 53 | 1.753561 | 3 | 47 | 1.568358 | 2 | 47 | 1.338792 | 0 | 4 | 0.171964 | 0 | 6 | 0.196623 | 0 | 2 | 0.058301 |
| 6 | 55618443..55740362 | BMP5 | -42.644 | 0.000326 | 6 | 6 | 0.105738 | 10 | 10 | 0.177739 | 1 | 1 | 0.015172 | 0 | 0 | 0 | 0 | 0 | 0 | 0 | 0 | 0 |
| 14 | 24787555..24804299 | ADCY4 | -42.5051 | 0.000298 | 7 | 7 | 0.062216 | 5 | 10 | 0.089641 | 5 | 8 | 0.061216 | 0 | 1 | 0.011549 | 0 | 0 | 0 | 0 | 1 | 0.007831 |
| 11 | 10906432..10920869 | CTD-2003C8.2 | -42.5028 | 0.0003 | 4 | 4 | 0.294176 | 8 | 10 | 0.741736 | 5 | 5 | 0.316583 | 0 | 0 | 0 | 0 | 0 | 0 | 0 | 0 | 0 |
| 18 | 36786888..37380282 | LINC00669 | -42.4386 | 0.000303 | 2 | 2 | 0.050069 | 7 | 7 | 0.176742 | 8 | 8 | 0.172425 | 0 | 0 | 0 | 0 | 0 | 0 | 0 | 0 | 0 |
| 16 | 28616903..28634946 | SULT1A1 | -42.4074 | 1.1E-25 | 41 | 41 | 0.335034 | 39 | 42 | 0.346144 | 39 | 42 | 0.295477 | 1 | 1 | 0.010618 | 0 | 0 | 0 | 1 | 1 | 0.0072 |
| 21 | 43916118..44001550 | SLC37A1 | -42.0364 | 1.49E-25 | 40 | 40 | 0.408842 | 36 | 36 | 0.371108 | 42 | 42 | 0.369585 | 0 | 0 | 0 | 0 | 0 | 0 | 2 | 2 | 0.018011 |
| 1 | 53552855..53608289 | SLC1A7 | -41.8276 | 2.51E-61 | 117 | 117 | 1.9232 | 86 | 86 | 1.425737 | 116 | 116 | 1.641599 | 3 | 3 | 0.064075 | 1 | 1 | 0.016281 | 2 | 2 | 0.028965 |
| 13 | 46916139..47012325 | KIAA0226L | -41.2098 | 8.4E-25 | 29 | 68 | 0.776256 | 39 | 81 | 0.932574 | 48 | 99 | 0.972975 | 1 | 1 | 0.014833 | 1 | 2 | 0.022613 | 0 | 5 | 0.050289 |
| 20 | 48120411..48184683 | PTGIS | -40.6864 | 3.5E-63 | 904 | 913 | 11.39755 | 994 | 1007 | 12.67864 | 1157 | 1162 | 12.4887 | 15 | 15 | 0.243312 | 20 | 20 | 0.247292 | 27 | 27 | 0.296967 |
| 1 | 156669398..156675608 | CRABP2 | -40.6702 | 1.7E-227 | 985 | 985 | 62.36496 | 818 | 818 | 52.23482 | 1001 | 1001 | 54.56433 | 17 | 17 | 1.398574 | 21 | 21 | 1.31693 | 19 | 19 | 1.059891 |
| 3 | 69156023..69172183 | LMOD3 | -40.1539 | 5.35E-23 | 37 | 37 | 0.602644 | 29 | 29 | 0.476387 | 47 | 47 | 0.659064 | 1 | 1 | 0.021164 | 1 | 1 | 0.016132 | 0 | 0 | 0 |
| 9 | 133884469..133969860 | LAMC3 | -40.0416 | 0.00058 | 8 | 8 | 0.07337 | 2 | 2 | 0.018499 | 6 | 6 | 0.047375 | 0 | 0 | 0 | 0 | 0 | 0 | 0 | 0 | 0 |
| 20 | 62184373..62188061 | C20orf195 | -40.0385 | 0.000567 | 6 | 6 | 0.347941 | 4 | 4 | 0.233946 | 6 | 6 | 0.299554 | 0 | 0 | 0 | 0 | 0 | 0 | 0 | 0 | 0 |
| 10 | 99344080..99372559 | HOGA1 | -40.0373 | 0.000566 | 5 | 24 | 0.402967 | 5 | 15 | 0.254011 | 6 | 23 | 0.332473 | 0 | 1 | 0.021817 | 0 | 3 | 0.049891 | 0 | 2 | 0.029586 |
| 14 | 24805227..24809251 | RIPK3 | -40.0373 | 0.000566 | 5 | 10 | 0.213901 | 5 | 7 | 0.151013 | 6 | 9 | 0.165739 | 0 | 0 | 0 | 0 | 0 | 0 | 0 | 0 | 0 |

| 2 | 165944032..166060577 | SCN3A | -39.8866 | 1.06E-13 | 19 | 28 | 0.198847 | 21 | 28 | 0.200549 | 24 | 37 | 0.226221 | 0 | 0 | 0 | 1 | 1 | 0.007034 | 0 | 0 | 0 |
| --- | --- | --- | --- | --- | --- | --- | --- | --- | --- | --- | --- | --- | --- | --- | --- | --- | --- | --- | --- | --- | --- | --- |
| 2 | 239047363..239061588 | KLHL30 | -39.8448 | 1.23E-13 | 20 | 20 | 0.373839 | 16 | 16 | 0.301631 | 28 | 28 | 0.450591 | 0 | 0 | 0 | 0 | 0 | 0 | 1 | 1 | 0.016469 |
| 2 | 30569525..30575297 | AC109642.1 | -39.7807 | 3.5E-132 | 262 | 262 | 6.181332 | 254 | 254 | 6.043894 | 264 | 264 | 5.362349 | 4 | 4 | 0.122623 | 9 | 9 | 0.210311 | 3 | 3 | 0.06236 |
| 5 | 53751445..53752207 | HSPB3 | -38.4901 | 5.45E-38 | 67 | 67 | 6.115717 | 74 | 74 | 6.812502 | 59 | 59 | 4.63655 | 2 | 2 | 0.237211 | 2 | 2 | 0.180818 | 0 | 0 | 0 |
| 12 | 10310902..10324737 | OLR1 | -38.4688 | 8.89E-18 | 37 | 37 | 0.843505 | 18 | 18 | 0.413867 | 54 | 54 | 1.059864 | 0 | 0 | 0 | 0 | 0 | 0 | 2 | 2 | 0.040172 |
| 4 | 186506598..186877806 | SORBS2 | -37.7352 | 0.001257 | 2 | 2 | 0.008326 | 11 | 11 | 0.046184 | 2 | 2 | 0.007168 | 0 | 0 | 0 | 0 | 0 | 0 | 0 | 0 | 0 |
| 22 | 36585172..36600886 | APOL4 | -37.646 | 0.00109 | 6 | 6 | 0.095515 | 6 | 8 | 0.128443 | 3 | 3 | 0.041116 | 0 | 0 | 0 | 0 | 0 | 0 | 0 | 0 | 0 |
| 11 | 66188475..66194178 | NPAS4 | -37.6457 | 0.001092 | 5 | 5 | 0.101703 | 7 | 7 | 0.143603 | 3 | 3 | 0.052536 | 0 | 0 | 0 | 0 | 0 | 0 | 0 | 0 | 0 |
| 19 | 2977444..2995177 | TLE6 | -37.6094 | 0.001082 | 6 | 6 | 0.114581 | 4 | 4 | 0.077041 | 5 | 5 | 0.082206 | 0 | 0 | 0 | 0 | 0 | 0 | 0 | 0 | 0 |
| 16 | 3115298..3131908 | IL32 | -37.5992 | 3.96E-46 | 69 | 85 | 2.024597 | 63 | 76 | 1.825726 | 111 | 146 | 2.993939 | 1 | 1 | 0.030949 | 2 | 2 | 0.047183 | 2 | 3 | 0.062957 |
| 22 | 27617310..27620688 | RP5-1172A22.1 | -37.5892 | 0.001085 | 3 | 3 | 0.214296 | 6 | 6 | 0.432261 | 6 | 6 | 0.36899 | 0 | 0 | 0 | 0 | 0 | 0 | 0 | 0 | 0 |
| 22 | 31530795..31536593 | PLA2G3 | -37.4099 | 6.93E-13 | 17 | 17 | 0.439001 | 22 | 22 | 0.572982 | 21 | 21 | 0.466881 | 1 | 1 | 0.033554 | 0 | 0 | 0 | 0 | 0 | 0 |
| 1 | 212859760..212873327 | BATF3 | -37.402 | 7.13E-13 | 22 | 22 | 0.564768 | 16 | 16 | 0.414257 | 22 | 22 | 0.486228 | 1 | 1 | 0.033356 | 0 | 0 | 0 | 0 | 0 | 0 |
| 11 | 111779289..111794446 | CRYAB | -37.3274 | 5E-183 | 678 | 680 | 15.60955 | 806 | 807 | 18.68346 | 1019 | 1019 | 20.13845 | 16 | 16 | 0.477236 | 18 | 19 | 0.43199 | 21 | 21 | 0.424721 |
| 17 | 67074843..67138029 | ABCA6 | -37.3221 | 1.4E-149 | 244 | 244 | 1.200881 | 259 | 259 | 1.285618 | 322 | 322 | 1.364383 | 4 | 4 | 0.02558 | 4 | 4 | 0.019499 | 10 | 10 | 0.043362 |
| 1 | 245318287..245872733 | KIF26B | -36.9054 | 3.2E-227 | 1441 | 1441 | 6.968 | 1340 | 1340 | 6.535086 | 1490 | 1490 | 6.202986 | 29 | 29 | 0.182211 | 33 | 33 | 0.158051 | 34 | 34 | 0.144853 |
| 15 | 81451916..81605104 | IL16 | -36.4698 | 6.9E-139 | 249 | 292 | 1.870039 | 230 | 282 | 1.821459 | 283 | 332 | 1.830528 | 6 | 6 | 0.049929 | 9 | 9 | 0.057089 | 2 | 2 | 0.011285 |
| 9 | 94903580..94922396 | LINC00475 | -36.2079 | 2.43E-12 | 22 | 22 | 0.397153 | 17 | 17 | 0.309518 | 19 | 19 | 0.295297 | 0 | 0 | 0 | 1 | 1 | 0.01788 | 0 | 1 | 0.015905 |
| X | 46937775..46952712 | RGN | -35.6064 | 5.91E-88 | 128 | 128 | 3.196381 | 138 | 138 | 3.475602 | 178 | 178 | 3.826828 | 2 | 2 | 0.064895 | 5 | 5 | 0.123668 | 3 | 3 | 0.066004 |
| 18 | 22208146..22242162 | RP11-449D8.1 | -35.5793 | 4.44E-12 | 16 | 16 | 0.450967 | 22 | 22 | 0.625388 | 19 | 19 | 0.46105 | 0 | 0 | 0 | 1 | 1 | 0.027917 | 0 | 0 | 0 |
| 1 | 860260..879955 | SAMD11 | -35.2728 | 3.59E-36 | 72 | 77 | 1.673246 | 56 | 64 | 1.402657 | 55 | 59 | 1.103803 | 1 | 1 | 0.028236 | 1 | 1 | 0.021523 | 2 | 2 | 0.038291 |
| 16 | 70613798..70694585 | IL34 | -35.2588 | 9.25E-21 | 25 | 25 | 0.779737 | 36 | 36 | 1.132435 | 38 | 38 | 1.020381 | 0 | 0 | 0 | 0 | 0 | 0 | 2 | 2 | 0.054959 |
| 4 | 111286889..111486441 | ENPEP | -35.2165 | 0.002139 | 9 | 9 | 0.08034 | 2 | 2 | 0.018006 | 3 | 3 | 0.023056 | 0 | 0 | 0 | 0 | 0 | 0 | 0 | 0 | 0 |
| 11 | 130274820..130298888 | ADAMTS8 | -35.1872 | 3.2E-211 | 1392 | 1392 | 21.43432 | 1192 | 1192 | 18.51182 | 1277 | 1277 | 16.92902 | 17 | 17 | 0.340135 | 35 | 35 | 0.533799 | 40 | 40 | 0.542667 |
| 19 | 56052023..56056909 | SBK3 | -35.1823 | 0.002071 | 7 | 7 | 0.32095 | 3 | 3 | 0.138728 | 4 | 4 | 0.157895 | 0 | 0 | 0 | 0 | 0 | 0 | 0 | 0 | 0 |
| 1 | 38076951..38100595 | RSPO1 | -35.178 | 0.002054 | 5 | 5 | 0.1102 | 5 | 5 | 0.111143 | 4 | 4 | 0.0759 | 0 | 0 | 0 | 0 | 0 | 0 | 0 | 0 | 0 |
| 22 | 38914954..38966291 | DMC1 | -35.1773 | 0.002057 | 4 | 4 | 0.092094 | 6 | 6 | 0.139324 | 4 | 4 | 0.079287 | 0 | 0 | 0 | 0 | 0 | 0 | 0 | 0 | 0 |
| 1 | 176826438..177134109 | ASTN1 | -35.1652 | 0.002077 | 7 | 7 | 0.052848 | 2 | 2 | 0.015229 | 5 | 5 | 0.032499 | 0 | 0 | 0 | 0 | 0 | 0 | 0 | 0 | 0 |
| 19 | 19051131..19057640 | AC005932.1 | -35.1611 | 0.002051 | 4 | 4 | 0.291102 | 5 | 6 | 0.440391 | 5 | 6 | 0.37593 | 0 | 0 | 0 | 0 | 0 | 0 | 0 | 0 | 0 |
| 2 | 175612320..175629200 | CHRNA1 | -35.1464 | 0.002055 | 5 | 6 | 0.14887 | 3 | 4 | 0.100096 | 6 | 7 | 0.149528 | 0 | 0 | 0 | 0 | 0 | 0 | 0 | 2 | 0.043721 |
| Y | 15815447..15817904 | TMSB4Y | -35.1456 | 0.002051 | 4 | 4 | 0.166917 | 4 | 4 | 0.168346 | 6 | 6 | 0.215557 | 0 | 0 | 0 | 0 | 0 | 0 | 0 | 0 | 0 |
| 14 | 63670832..63759937 | RHOJ | -35.1031 | 9.3E-143 | 325 | 325 | 5.967572 | 332 | 332 | 6.148295 | 459 | 459 | 7.256001 | 2 | 2 | 0.047717 | 12 | 12 | 0.21824 | 12 | 12 | 0.194133 |
| 4 | 26483022..26492084 | CCKAR | -35.0836 | 0.002095 | 3 | 3 | 0.121476 | 2 | 2 | 0.081677 | 9 | 9 | 0.313748 | 0 | 0 | 0 | 0 | 0 | 0 | 0 | 0 | 0 |
| 7 | 99302660..99332819 | CYP3A7 | -35.0807 | 0.002109 | 4 | 4 | 0.078897 | 1 | 1 | 0.019893 | 9 | 9 | 0.152831 | 0 | 0 | 0 | 0 | 0 | 0 | 0 | 0 | 0 |
| 17 | 79890260..79900288 | PYCR1 | -34.8715 | 1.5E-189 | 537 | 699 | 16.86856 | 509 | 652 | 15.86904 | 560 | 730 | 15.1668 | 12 | 17 | 0.533067 | 13 | 19 | 0.454144 | 13 | 17 | 0.361454 |
| 20 | 36531499..36573752 | VSTM2L | -34.8632 | 5.86E-27 | 51 | 51 | 1.806691 | 38 | 38 | 1.357687 | 51 | 51 | 1.555443 | 3 | 3 | 0.138091 | 0 | 0 | 0 | 0 | 0 | 0 |
| 12 | 70910630..71031220 | PTPRB | -33.2874 | 2.96E-45 | 65 | 69 | 0.354342 | 64 | 75 | 0.388452 | 85 | 97 | 0.42886 | 2 | 2 | 0.013346 | 0 | 0 | 0 | 3 | 3 | 0.013574 |
| X | 48316920..48328644 | SLC38A5 | -32.7888 | 2.6E-168 | 329 | 329 | 5.705574 | 298 | 298 | 5.212211 | 374 | 374 | 5.583999 | 9 | 9 | 0.202805 | 6 | 6 | 0.103061 | 10 | 10 | 0.152794 |
| 10 | 92671853..92681033 | ANKRD1 | -32.78 | 0.004004 | 8 | 8 | 0.281541 | 3 | 3 | 0.106482 | 2 | 2 | 0.060597 | 0 | 0 | 0 | 0 | 0 | 0 | 0 | 0 | 0 |
| 3 | 46243200..46249887 | CCR1 | -32.7722 | 0.003963 | 7 | 45 | 1.147593 | 4 | 34 | 0.874494 | 2 | 41 | 0.900181 | 0 | 0 | 0 | 0 | 0 | 0 | 0 | 0 | 0 |
| 1 | 1138888..1142071 | TNFRSF18 | -32.7318 | 0.003908 | 5 | 5 | 0.254183 | 4 | 4 | 0.205087 | 4 | 4 | 0.175068 | 0 | 0 | 0 | 0 | 0 | 0 | 0 | 0 | 0 |
| 1 | 201159953..201198080 | IGFN1 | -32.7308 | 0.003908 | 4 | 4 | 0.022993 | 5 | 5 | 0.028987 | 4 | 4 | 0.019796 | 0 | 0 | 0 | 0 | 0 | 0 | 0 | 0 | 0 |
| 20 | 61733483..61735738 | HAR1A | -32.7178 | 0.003932 | 6 | 6 | 0.222039 | 2 | 2 | 0.074647 | 5 | 5 | 0.159301 | 0 | 0 | 0 | 0 | 0 | 0 | 0 | 0 | 0 |
| 14 | 21152746..21168735 | AL163636.6 | -32.7159 | 0.003904 | 4 | 74 | 3.440464 | 4 | 86 | 4.032609 | 5 | 90 | 3.602452 | 0 | 21 | 1.268635 | 0 | 7 | 0.322346 | 0 | 10 | 0.409627 |
| 1 | 95104017..95285837 | LINC01057 | -32.7118 | 0.003976 | 1 | 1 | 0.029549 | 7 | 7 | 0.208611 | 5 | 5 | 0.127197 | 0 | 0 | 0 | 0 | 0 | 0 | 0 | 0 | 0 |
| 17 | 32646055..32648421 | CCL8 | -32.7008 | 0.003909 | 4 | 4 | 0.220924 | 3 | 3 | 0.167111 | 6 | 6 | 0.285301 | 0 | 0 | 0 | 0 | 0 | 0 | 0 | 0 | 0 |
| 2 | 233924677..234116549 | INPP5D | -32.6998 | 0.003909 | 3 | 3 | 0.029857 | 4 | 4 | 0.04015 | 6 | 6 | 0.05141 | 0 | 0 | 0 | 0 | 0 | 0 | 0 | 0 | 0 |
| 10 | 67330096..67526299 | RP11-222A11.1 | -32.6979 | 0.003924 | 2 | 2 | 0.017152 | 5 | 5 | 0.043247 | 6 | 6 | 0.044301 | 0 | 0 | 0 | 0 | 0 | 0 | 0 | 0 | 0 |
| 7 | 87905744..87936206 | STEAP4 | -32.6573 | 0.003974 | 1 | 8 | 0.097612 | 4 | 11 | 0.135366 | 8 | 22 | 0.231103 | 0 | 2 | 0.031708 | 0 | 4 | 0.048341 | 0 | 1 | 0.01075 |

| 11 | 76368568..76381791 | LRRC32 | -32.2259 | 2.2E-93 | 149 | 1491 | 23.28827 | 185 | 1459 | 22.98356 | 183 | 1712 | 23.02151 | 5 | 21 | 0.426198 | 3 | 34 | 0.52599 | 5 | 39 | 0.536695 |
| --- | --- | --- | --- | --- | --- | --- | --- | --- | --- | --- | --- | --- | --- | --- | --- | --- | --- | --- | --- | --- | --- | --- |
| 17 | 47653220..47661189 | NXPH3 | -32.1742 | 3.85E-26 | 43 | 44 | 1.054518 | 42 | 42 | 1.015204 | 44 | 44 | 0.907872 | 2 | 2 | 0.062282 | 0 | 0 | 0 | 1 | 1 | 0.021116 |
| 10 | 129894923..129924649 | MKI67 | -32.0154 | 1.8E-224 | 1244 | 1244 | 6.765036 | 1138 | 1138 | 6.241577 | 1270 | 1271 | 5.950666 | 25 | 25 | 0.176653 | 23 | 23 | 0.123884 | 47 | 47 | 0.225191 |
| 15 | 91426925..91439006 | FES | -32.0051 | 6.3E-109 | 304 | 304 | 4.99232 | 225 | 225 | 3.726608 | 291 | 291 | 4.114264 | 5 | 5 | 0.106692 | 10 | 10 | 0.162655 | 6 | 6 | 0.086813 |
| 19 | 10397643..10399198 | ICAM4 | -31.8134 | 1.4E-11 | 16 | 56 | 2.733136 | 13 | 51 | 2.510416 | 22 | 55 | 2.311033 | 0 | 0 | 0 | 0 | 0 | 0 | 1 | 5 | 0.215004 |
| 20 | 62328021..62330037 | TNFRSF6B | -31.7957 | 1.55E-11 | 11 | 131 | 8.117123 | 17 | 126 | 7.87415 | 23 | 169 | 9.015459 | 0 | 0 | 0 | 0 | 0 | 0 | 1 | 16 | 0.873482 |
| 4 | 159091904..159124029 | RP11-597D13.9 | -31.7532 | 2.05E-10 | 10 | 57 | 0.703996 | 16 | 67 | 0.834588 | 25 | 61 | 0.648627 | 0 | 0 | 0 | 1 | 3 | 0.036699 | 0 | 1 | 0.010882 |
| 7 | 5862791..5894066 | ZNF815P | -31.7282 | 3.01E-25 | 43 | 62 | 1.298665 | 45 | 56 | 1.18303 | 39 | 55 | 0.991833 | 1 | 1 | 0.027217 | 2 | 2 | 0.041493 | 0 | 0 | 0 |
| 11 | 69924408..70035634 | ANO1 | -31.4168 | 3.76E-26 | 35 | 46 | 0.531033 | 44 | 52 | 0.605438 | 47 | 55 | 0.546634 | 0 | 0 | 0 | 2 | 2 | 0.022868 | 1 | 1 | 0.010171 |
| 16 | 2039661..2044276 | SYNGR3 | -31.0517 | 9.36E-69 | 143 | 146 | 2.973198 | 116 | 122 | 2.505724 | 126 | 129 | 2.26168 | 4 | 4 | 0.105843 | 3 | 3 | 0.060511 | 3 | 3 | 0.053826 |
| 1 | 87595448..87634881 | LINC01140 | -31.0289 | 1.38E-24 | 28 | 83 | 0.860597 | 40 | 134 | 1.401293 | 57 | 159 | 1.419349 | 1 | 3 | 0.040418 | 1 | 3 | 0.030809 | 1 | 1 | 0.009135 |
| 17 | 43298811..43324687 | FMNL1 | -30.8546 | 6.5E-175 | 411 | 489 | 4.503103 | 403 | 489 | 4.541656 | 461 | 577 | 4.574558 | 11 | 11 | 0.131622 | 11 | 12 | 0.109452 | 12 | 13 | 0.105475 |
| 6 | 47845764..48036425 | PTCHD4 | -30.5991 | 5.03E-10 | 17 | 17 | 0.228701 | 15 | 15 | 0.203523 | 17 | 17 | 0.196897 | 1 | 1 | 0.01748 | 0 | 0 | 0 | 0 | 0 | 0 |
| 3 | 46556913..46621589 | LRRC2 | -30.5871 | 4.66E-11 | 13 | 13 | 0.161046 | 16 | 16 | 0.199907 | 20 | 20 | 0.213308 | 0 | 0 | 0 | 0 | 0 | 0 | 1 | 1 | 0.010915 |
| 5 | 80625824..80689998 | ACOT12 | -30.3248 | 0.007547 | 7 | 7 | 0.199478 | 3 | 3 | 0.086222 | 2 | 2 | 0.049068 | 0 | 0 | 0 | 0 | 0 | 0 | 0 | 0 | 0 |
| X | 13053737..13062801 | FAM9C | -30.3074 | 0.007544 | 7 | 7 | 0.083223 | 2 | 2 | 0.023982 | 3 | 4 | 0.040943 | 0 | 0 | 0 | 0 | 0 | 0 | 0 | 0 | 0 |
| 13 | 114586640..114626485 | LINC00452 | -30.3 | 0.007459 | 4 | 4 | 0.067898 | 5 | 5 | 0.085599 | 3 | 3 | 0.043842 | 0 | 0 | 0 | 0 | 0 | 0 | 0 | 0 | 0 |
| 17 | 7338762..7340998 | TMEM102 | -30.2863 | 0.007457 | 5 | 31 | 1.014106 | 3 | 23 | 0.758842 | 4 | 36 | 1.013898 | 0 | 0 | 0 | 0 | 2 | 0.064802 | 0 | 1 | 0.028822 |
| 8 | 37262957..37264242 | RP11-527N22.2 | -30.2688 | 0.007467 | 2 | 2 | 0.24099 | 5 | 5 | 0.607633 | 5 | 5 | 0.518692 | 0 | 0 | 0 | 0 | 0 | 0 | 0 | 0 | 0 |
| 18 | 57488272..57492493 | RP11-824M15.3 | -30.2688 | 0.007467 | 2 | 2 | 0.125038 | 5 | 5 | 0.315271 | 5 | 5 | 0.269124 | 0 | 0 | 0 | 0 | 0 | 0 | 0 | 0 | 0 |
| 16 | 88941266..89043612 | CBFA2T3 | -30.2558 | 0.007467 | 4 | 4 | 0.046648 | 2 | 2 | 0.023524 | 6 | 6 | 0.060242 | 0 | 0 | 0 | 0 | 0 | 0 | 0 | 0 | 0 |
| 19 | 782755..785080 | AC006273.5 | -30.2554 | 0.007459 | 3 | 3 | 0.240159 | 3 | 3 | 0.242215 | 6 | 6 | 0.413523 | 0 | 0 | 0 | 0 | 0 | 0 | 0 | 0 | 0 |
| 17 | 7491496..7493488 | SOX15 | -30.2539 | 0.007467 | 2 | 30 | 1.355863 | 4 | 37 | 1.686547 | 6 | 29 | 1.128399 | 0 | 5 | 0.293627 | 0 | 7 | 0.313351 | 0 | 5 | 0.199098 |
| 1 | 210406144..210419976 | SERTAD4 | -30.2539 | 0.007467 | 2 | 2 | 0.025479 | 4 | 4 | 0.051394 | 6 | 6 | 0.065807 | 0 | 0 | 0 | 0 | 0 | 0 | 0 | 0 | 0 |
| 8 | 6666038..6693166 | XKR5 | -30.2371 | 0.007491 | 2 | 2 | 0.027681 | 3 | 3 | 0.041877 | 7 | 7 | 0.083411 | 0 | 0 | 0 | 0 | 0 | 0 | 0 | 0 | 0 |
| 13 | 31506840..31549639 | TEX26 | -30.2332 | 0.007593 | 5 | 6 | 0.251733 | 0 | 1 | 0.042315 | 7 | 9 | 0.325089 | 0 | 0 | 0 | 0 | 0 | 0 | 0 | 0 | 0 |
| 2 | 238165734..238166319 | AC112715.2 | -30.2153 | 0.007551 | 2 | 2 | 0.397978 | 2 | 2 | 0.401385 | 8 | 8 | 1.370533 | 0 | 0 | 0 | 0 | 0 | 0 | 0 | 0 | 0 |
| 3 | 156977531..157251408 | VEPH1 | -29.8743 | 7.58E-24 | 32 | 40 | 0.42506 | 39 | 49 | 0.525157 | 49 | 66 | 0.603816 | 1 | 1 | 0.013808 | 2 | 2 | 0.02105 | 0 | 1 | 0.009363 |
| 4 | 100257649..100274184 | ADH1C | -29.3565 | 9.23E-17 | 30 | 33 | 1.235658 | 31 | 32 | 1.208472 | 21 | 24 | 0.773688 | 0 | 0 | 0 | 2 | 2 | 0.074174 | 0 | 0 | 0 |
| 10 | 15555948..15762124 | ITGA8 | -29.2555 | 4.73E-17 | 25 | 25 | 0.23129 | 29 | 29 | 0.270594 | 28 | 28 | 0.223021 | 0 | 0 | 0 | 1 | 1 | 0.009163 | 1 | 1 | 0.008151 |
| 10 | 71812552..71872036 | H2AFY2 | -29.1756 | 2.4E-114 | 233 | 279 | 9.813776 | 214 | 282 | 10.00422 | 230 | 298 | 9.024404 | 4 | 5 | 0.228525 | 11 | 13 | 0.452912 | 4 | 5 | 0.154955 |
| 19 | 44080952..44088116 | PINLYP | -28.9006 | 2.59E-16 | 34 | 49 | 0.955928 | 19 | 48 | 0.944436 | 28 | 54 | 0.90697 | 1 | 7 | 0.177443 | 0 | 1 | 0.019323 | 1 | 2 | 0.034377 |
| X | 155233883..155255299 | AJ271736.10 | -28.7881 | 0.040279 | 0 | 0 | 0 | 11 | 16 | 0.527395 | 0 | 0 | 0 | 0 | 0 | 0 | 0 | 0 | 0 | 0 | 0 | 0 |
| 1 | 100111499..100160097 | PALMD | -28.4666 | 4.74E-46 | 68 | 68 | 0.773214 | 65 | 65 | 0.74543 | 84 | 84 | 0.82232 | 0 | 0 | 0 | 2 | 2 | 0.022525 | 4 | 4 | 0.040073 |
| 2 | 127413509..127454246 | GYPC | -28.2564 | 2.4E-196 | 1292 | 1292 | 27.79822 | 1086 | 1086 | 23.56604 | 1182 | 1182 | 21.89486 | 31 | 31 | 0.866659 | 29 | 29 | 0.618004 | 45 | 45 | 0.853041 |
| 12 | 102789645..102874423 | IGF1 | -28.1719 | 7.92E-29 | 52 | 52 | 0.44783 | 40 | 40 | 0.347434 | 55 | 55 | 0.407796 | 2 | 2 | 0.022381 | 2 | 2 | 0.01706 | 0 | 0 | 0 |
| 2 | 169690642..169769881 | SPC25 | -28.1499 | 2.98E-15 | 29 | 29 | 1.097088 | 20 | 20 | 0.76309 | 30 | 30 | 0.977091 | 1 | 2 | 0.098312 | 1 | 1 | 0.03747 | 0 | 0 | 0 |
| 11 | 3659733..3663546 | ART5 | -28.1017 | 6.34E-10 | 9 | 9 | 0.370677 | 17 | 17 | 0.706163 | 19 | 19 | 0.673717 | 0 | 0 | 0 | 0 | 0 | 0 | 1 | 1 | 0.036287 |
| 7 | 149941005..150020814 | ACTR3C | -27.8532 | 0.014137 | 3 | 3 | 0.032404 | 5 | 7 | 0.076256 | 3 | 5 | 0.046496 | 0 | 0 | 0 | 0 | 0 | 0 | 0 | 0 | 0 |
| 17 | 37894180..37903544 | GRB7 | -27.8402 | 0.01411 | 4 | 4 | 0.077449 | 3 | 3 | 0.058584 | 4 | 4 | 0.066679 | 0 | 0 | 0 | 0 | 0 | 0 | 0 | 0 | 0 |
| 11 | 74165886..74178774 | KCNE3 | -27.8393 | 0.01411 | 3 | 14 | 0.265174 | 4 | 16 | 0.305651 | 4 | 18 | 0.293526 | 0 | 1 | 0.024611 | 0 | 0 | 0 | 0 | 0 | 0 |
| 1 | 65532310..65533420 | RP4-535B20.1 | -27.8363 | 0.014422 | 0 | 0 | 0 | 7 | 7 | 1.586119 | 4 | 4 | 0.773688 | 0 | 0 | 0 | 0 | 0 | 0 | 0 | 0 | 0 |
| 10 | 115999018..116051272 | VWA2 | -27.8112 | 0.014152 | 3 | 3 | 0.062036 | 2 | 2 | 0.041712 | 6 | 6 | 0.106819 | 0 | 0 | 0 | 0 | 0 | 0 | 0 | 0 | 0 |
| 16 | 29819966..29823306 | AC009133.14 | -27.8112 | 0.014152 | 3 | 49 | 1.252353 | 2 | 55 | 1.417737 | 6 | 53 | 1.16621 | 0 | 15 | 0.498143 | 0 | 6 | 0.151887 | 0 | 18 | 0.405328 |
| 2 | 219687106..219696809 | PRKAG3 | -27.8103 | 0.014152 | 2 | 2 | 0.041779 | 3 | 3 | 0.063206 | 6 | 6 | 0.107908 | 0 | 0 | 0 | 0 | 0 | 0 | 0 | 0 | 0 |
| 14 | 103566481..103576896 | EXOC3L4 | -27.8103 | 0.014152 | 2 | 2 | 0.040027 | 3 | 3 | 0.060554 | 6 | 6 | 0.103381 | 0 | 0 | 0 | 0 | 0 | 0 | 0 | 0 | 0 |
| 1 | 234663637..234667525 | RP5-855F14.1 | -27.8078 | 0.014192 | 1 | 1 | 0.024267 | 4 | 4 | 0.097899 | 6 | 6 | 0.125354 | 0 | 0 | 0 | 0 | 0 | 0 | 0 | 0 | 0 |
| 2 | 215674953..215827998 | AC072062.1 | -27.8078 | 0.014192 | 1 | 12 | 0.396468 | 4 | 14 | 0.466506 | 6 | 15 | 0.426666 | 0 | 0 | 0 | 0 | 4 | 0.130896 | 0 | 4 | 0.116437 |
| 1 | 16345370..16360545 | CLCNKA | -27.7923 | 0.014245 | 3 | 3 | 0.060109 | 1 | 1 | 0.020208 | 7 | 7 | 0.12075 | 0 | 0 | 0 | 0 | 0 | 0 | 0 | 0 | 0 |

| 5 | 137514408..137523404 | KIF20A | -27.5626 | 5.8E-158 | 289 | 289 | 5.08533 | 288 | 288 | 5.111121 | 329 | 329 | 4.984109 | 7 | 7 | 0.160048 | 6 | 6 | 0.104571 | 14 | 14 | 0.217046 |
| --- | --- | --- | --- | --- | --- | --- | --- | --- | --- | --- | --- | --- | --- | --- | --- | --- | --- | --- | --- | --- | --- | --- |
| 17 | 29644578..29648902 | EVI2A | -27.0464 | 6.72E-15 | 14 | 167 | 5.616083 | 30 | 208 | 7.054767 | 32 | 262 | 7.585578 | 0 | 0 | 0 | 2 | 8 | 0.266469 | 0 | 6 | 0.177775 |
| 19 | 4324040..4342783 | STAP2 | -26.8674 | 3.04E-41 | 69 | 70 | 1.762556 | 72 | 73 | 1.853831 | 63 | 63 | 1.365702 | 2 | 2 | 0.065435 | 0 | 0 | 0 | 4 | 4 | 0.088738 |
| X | 150863596..150874396 | PRRG3 | -26.7638 | 1.64E-15 | 25 | 26 | 0.284538 | 25 | 26 | 0.286974 | 25 | 30 | 0.282656 | 1 | 5 | 0.0711 | 0 | 0 | 0 | 1 | 1 | 0.009642 |
| 6 | 31982539..32003195 | C4B | -26.5356 | 1.65E-57 | 200 | 365 | 3.57235 | 226 | 403 | 3.978035 | 155 | 327 | 2.755366 | 8 | 19 | 0.241628 | 6 | 13 | 0.126021 | 4 | 10 | 0.086231 |
| 1 | 79085607..79111830 | IFI44L | -26.3366 | 2.27E-09 | 16 | 16 | 0.108822 | 16 | 16 | 0.109754 | 10 | 10 | 0.058555 | 0 | 0 | 0 | 0 | 0 | 0 | 1 | 1 | 0.005992 |
| 16 | 50280048..50352046 | ADCY7 | -26.27 | 2.6E-119 | 208 | 267 | 2.154753 | 195 | 268 | 2.18134 | 240 | 349 | 2.424834 | 4 | 6 | 0.062917 | 8 | 11 | 0.087926 | 8 | 11 | 0.078214 |
| 16 | 67311413..67323402 | PLEKHG4 | -26.0896 | 1.2E-173 | 341 | 341 | 3.240903 | 313 | 313 | 3.000256 | 394 | 394 | 3.223875 | 10 | 10 | 0.123493 | 11 | 11 | 0.103548 | 12 | 12 | 0.100484 |
| 8 | 131792547..132054672 | ADCY8 | -25.9537 | 1.02E-30 | 61 | 61 | 0.712702 | 40 | 40 | 0.471347 | 66 | 66 | 0.663884 | 3 | 3 | 0.045544 | 2 | 2 | 0.023144 | 0 | 0 | 0 |
| 16 | 318300..325980 | RGS11 | -25.7738 | 8.69E-27 | 42 | 102 | 1.480598 | 49 | 127 | 1.859272 | 43 | 98 | 1.22471 | 0 | 3 | 0.056584 | 1 | 11 | 0.15815 | 3 | 15 | 0.191837 |
| 19 | 5823813..5828335 | NRTN | -25.6741 | 4.07E-09 | 10 | 10 | 0.628009 | 18 | 18 | 1.140093 | 13 | 13 | 0.702877 | 0 | 0 | 0 | 0 | 0 | 0 | 1 | 1 | 0.055331 |
| 20 | 61584052..61599949 | SLC17A9 | -25.5416 | 1.8E-101 | 193 | 193 | 3.000381 | 166 | 166 | 2.602732 | 204 | 204 | 2.730358 | 3 | 3 | 0.0606 | 9 | 9 | 0.13858 | 6 | 6 | 0.082181 |
| 19 | 49055332..49102682 | SULT2B1 | -25.4705 | 0.014471 | 7 | 7 | 0.172758 | 3 | 3 | 0.074673 | 0 | 0 | 0 | 0 | 0 | 0 | 0 | 0 | 0 | 0 | 0 | 0 |
| 19 | 2458933..2462183 | AC005624.2 | -25.4384 | 0.026895 | 4 | 4 | 0.750902 | 5 | 5 | 0.946663 | 1 | 1 | 0.161619 | 0 | 0 | 0 | 0 | 0 | 0 | 0 | 0 | 0 |
| 19 | 50243010..50266587 | TSKS | -25.4235 | 0.026825 | 5 | 5 | 0.164648 | 3 | 3 | 0.099635 | 2 | 2 | 0.056701 | 0 | 0 | 0 | 0 | 0 | 0 | 0 | 0 | 0 |
| 1 | 177140633..177251558 | BRINP2 | -25.4125 | 0.026974 | 6 | 6 | 0.105711 | 1 | 1 | 0.017769 | 3 | 3 | 0.045505 | 0 | 0 | 0 | 0 | 0 | 0 | 0 | 0 | 0 |
| 16 | 1535887..1538982 | PTX4 | -25.4099 | 0.026818 | 5 | 5 | 0.206298 | 2 | 2 | 0.083226 | 3 | 3 | 0.106565 | 0 | 0 | 0 | 0 | 0 | 0 | 0 | 0 | 0 |
| 11 | 115624966..115631345 | LINC00900 | -25.4084 | 0.026762 | 4 | 15 | 0.246681 | 3 | 20 | 0.331723 | 3 | 21 | 0.297326 | 0 | 1 | 0.021369 | 0 | 0 | 0 | 0 | 0 | 0 |
| 12 | 113344582..113369990 | OAS1 | -25.3965 | 0.026876 | 5 | 7 | 0.124686 | 1 | 2 | 0.03593 | 4 | 7 | 0.107347 | 0 | 0 | 0 | 0 | 0 | 0 | 0 | 0 | 0 |
| 22 | 44220389..44258398 | SULT4A1 | -25.395 | 0.026747 | 3 | 3 | 0.072953 | 3 | 3 | 0.073578 | 4 | 4 | 0.083744 | 0 | 0 | 0 | 0 | 0 | 0 | 0 | 0 | 0 |
| 2 | 232387871..232395206 | NMUR1 | -25.395 | 0.026747 | 3 | 3 | 0.063353 | 3 | 3 | 0.063895 | 4 | 4 | 0.072724 | 0 | 0 | 0 | 0 | 0 | 0 | 0 | 0 | 0 |
| 11 | 75470557..75512579 | DGAT2 | -25.3941 | 0.026767 | 2 | 2 | 0.017623 | 4 | 4 | 0.035548 | 4 | 4 | 0.030345 | 0 | 0 | 0 | 0 | 0 | 0 | 0 | 0 | 0 |
| 12 | 52281744..52285448 | ANKRD33 | -25.3941 | 0.026767 | 2 | 2 | 0.037596 | 4 | 4 | 0.075835 | 4 | 4 | 0.064735 | 0 | 0 | 0 | 0 | 0 | 0 | 0 | 0 | 0 |
| 7 | 30791753..30931696 | INMT-FAM188B | -25.3941 | 0.026767 | 2 | 2 | 0.048365 | 4 | 8 | 0.195118 | 4 | 6 | 0.124918 | 0 | 0 | 0 | 0 | 0 | 0 | 0 | 0 | 0 |
| 15 | 35080297..35088340 | ACTC1 | -25.3941 | 0.026767 | 2 | 3 | 0.04504 | 4 | 4 | 0.060567 | 4 | 5 | 0.064627 | 0 | 0 | 0 | 0 | 0 | 0 | 0 | 0 | 0 |
| 8 | 24241798..24263526 | ADAMDEC1 | -25.3812 | 0.026773 | 2 | 2 | 0.057134 | 3 | 6 | 0.172869 | 5 | 6 | 0.147566 | 0 | 0 | 0 | 0 | 0 | 0 | 0 | 0 | 0 |
| 22 | 39378352..39388809 | APOBEC3B | -25.3806 | 8.74E-35 | 46 | 57 | 2.093793 | 53 | 63 | 2.334004 | 64 | 74 | 2.340242 | 1 | 2 | 0.09546 | 2 | 3 | 0.109149 | 2 | 2 | 0.064728 |
| 7 | 47834889..47859445 | C7orf69 | -25.3758 | 0.026998 | 0 | 1 | 0.086196 | 5 | 5 | 0.434668 | 5 | 6 | 0.445254 | 0 | 0 | 0 | 0 | 0 | 0 | 0 | 0 | 0 |
| 1 | 178818840..178840187 | ANGPTL1 | -25.3646 | 0.026883 | 1 | 8 | 0.163729 | 3 | 13 | 0.268337 | 6 | 22 | 0.38764 | 0 | 0 | 0 | 0 | 2 | 0.040542 | 0 | 1 | 0.018032 |
| 12 | 65996649..66006777 | RP11-221N13.3 | -25.3469 | 0.027003 | 2 | 3 | 0.233451 | 1 | 7 | 0.549382 | 7 | 10 | 0.669953 | 0 | 1 | 0.101113 | 0 | 0 | 0 | 0 | 0 | 0 |
| 3 | 182895831..183146566 | MCF2L2 | -25.3445 | 0.027098 | 3 | 3 | 0.010158 | 0 | 0 | 0 | 7 | 9 | 0.026237 | 0 | 0 | 0 | 0 | 0 | 0 | 0 | 0 | 0 |
| 3 | 16216156..16273499 | GALNT15 | -25.0693 | 3.2E-176 | 389 | 407 | 4.994007 | 407 | 426 | 5.271894 | 417 | 445 | 4.700944 | 11 | 11 | 0.17538 | 11 | 11 | 0.133686 | 18 | 19 | 0.205405 |
| 2 | 169643049..169722024 | NOSTRIN | -24.9918 | 6.2E-08 | 9 | 10 | 0.13271 | 14 | 16 | 0.214154 | 17 | 18 | 0.205658 | 1 | 1 | 0.017244 | 0 | 0 | 0 | 0 | 0 | 0 |
| 11 | 405716..417455 | SIGIRR | -24.7741 | 1.31E-77 | 160 | 160 | 3.187467 | 149 | 149 | 2.993741 | 145 | 145 | 2.486933 | 2 | 2 | 0.051771 | 4 | 4 | 0.078927 | 9 | 9 | 0.157969 |
| 18 | 2571510..2616634 | NDC80 | -24.5821 | 5.27E-30 | 53 | 53 | 1.025346 | 95 | 95 | 1.853619 | 68 | 68 | 1.132593 | 3 | 3 | 0.075413 | 1 | 1 | 0.019162 | 3 | 3 | 0.051135 |
| 17 | 42081914..42086431 | NAGS | -24.5763 | 1.29E-24 | 46 | 46 | 1.135267 | 41 | 41 | 1.020531 | 41 | 41 | 0.871153 | 3 | 3 | 0.096204 | 1 | 1 | 0.024444 | 0 | 0 | 0 |
| 1 | 145524891..145543868 | ITGA10 | -24.572 | 1.18E-76 | 128 | 128 | 1.410555 | 181 | 181 | 2.011689 | 173 | 173 | 1.641332 | 3 | 3 | 0.042957 | 5 | 5 | 0.054574 | 8 | 8 | 0.077674 |
| 18 | 3466248..3478976 | RP11-838N2.4 | -24.411 | 1.22E-08 | 13 | 13 | 0.861465 | 12 | 12 | 0.802007 | 14 | 14 | 0.798717 | 0 | 0 | 0 | 1 | 1 | 0.065635 | 0 | 0 | 0 |
| 18 | 14728271..14852737 | ANKRD30B | -23.9384 | 3.59E-13 | 29 | 32 | 0.372564 | 16 | 24 | 0.281815 | 22 | 23 | 0.230541 | 1 | 1 | 0.015128 | 0 | 0 | 0 | 1 | 3 | 0.030773 |
| 9 | 95256365..95298937 | ECM2 | -23.869 | 3.97E-13 | 17 | 52 | 0.832552 | 19 | 48 | 0.775089 | 31 | 62 | 0.854614 | 0 | 2 | 0.041607 | 0 | 2 | 0.031716 | 2 | 2 | 0.028212 |
| 15 | 65488337..65503826 | CILP | -23.8338 | 2.51E-08 | 12 | 12 | 0.187641 | 16 | 16 | 0.25233 | 10 | 10 | 0.134622 | 0 | 0 | 0 | 0 | 0 | 0 | 1 | 1 | 0.013777 |
| 15 | 33057747..33486897 | FMN1 | -23.8176 | 4E-198 | 538 | 538 | 1.869182 | 584 | 584 | 2.046372 | 762 | 763 | 2.282256 | 20 | 20 | 0.090288 | 20 | 20 | 0.068824 | 25 | 25 | 0.076527 |
| 7 | 116916685..116963343 | WNT2 | -23.6448 | 4.73E-94 | 150 | 184 | 4.264523 | 170 | 196 | 4.581535 | 233 | 259 | 5.168003 | 5 | 7 | 0.210806 | 6 | 7 | 0.16069 | 8 | 8 | 0.16336 |
| 11 | 57228022..57245007 | RTN4RL2 | -23.5465 | 4.08E-22 | 26 | 64 | 1.867346 | 45 | 74 | 2.177603 | 52 | 86 | 2.160297 | 1 | 2 | 0.075824 | 0 | 2 | 0.057798 | 3 | 3 | 0.07712 |
| 5 | 155297354..156194799 | SGCD | -23.3221 | 1.3E-194 | 768 | 768 | 5.052734 | 915 | 915 | 6.071397 | 1167 | 1167 | 6.610076 | 36 | 36 | 0.307751 | 28 | 28 | 0.182458 | 36 | 36 | 0.208675 |
| X | 55934556..56041606 | RP13-188A5.1 | -23.1655 | 4.2E-07 | 17 | 17 | 1.175754 | 7 | 7 | 0.488279 | 13 | 13 | 0.774072 | 1 | 1 | 0.089867 | 0 | 0 | 0 | 0 | 0 | 0 |
| 1 | 203444956..203460480 | PRELP | -23.1133 | 0 | 3147 | 3147 | 38.13754 | 3105 | 3107 | 37.97515 | 3421 | 3421 | 35.69269 | 102 | 102 | 1.606158 | 128 | 128 | 1.536402 | 117 | 117 | 1.249237 |
| 15 | 62359176..62363116 | C2CD4A | -23.0551 | 0.028331 | 8 | 8 | 0.161733 | 1 | 1 | 0.02039 | 0 | 0 | 0 | 0 | 0 | 0 | 0 | 0 | 0 | 0 | 0 | 0 |
| 20 | 24986868..25039616 | ACSS1 | -23.0419 | 3.61E-33 | 47 | 47 | 0.324224 | 57 | 57 | 0.396575 | 72 | 72 | 0.427613 | 3 | 3 | 0.026891 | 1 | 1 | 0.006833 | 2 | 2 | 0.012156 |

| 21 | 30449792..30548210 | MAP3K7CL | -23.0255 | 6.79E-48 | 647 | 647 | 10.02025 | 678 | 678 | 10.59025 | 819 | 819 | 10.92015 | 15 | 15 | 0.301854 | 31 | 31 | 0.475527 | 31 | 31 | 0.422999 |
| --- | --- | --- | --- | --- | --- | --- | --- | --- | --- | --- | --- | --- | --- | --- | --- | --- | --- | --- | --- | --- | --- | --- |
| 18 | 9885763..9889272 | TXNDC2 | -22.9988 | 0.02742 | 1 | 1 | 0.020777 | 7 | 7 | 0.146688 | 1 | 1 | 0.017888 | 0 | 0 | 0 | 0 | 0 | 0 | 0 | 0 | 0 |
| 10 | 43689983..43762367 | RASGEF1A | -22.9617 | 2.33E-31 | 44 | 44 | 0.504599 | 52 | 52 | 0.60145 | 80 | 80 | 0.789867 | 3 | 3 | 0.044704 | 1 | 1 | 0.011359 | 2 | 2 | 0.020208 |
| 1 | 171604557..171621823 | MYOC | -22.727 | 2.29E-78 | 165 | 165 | 5.485258 | 124 | 124 | 4.157546 | 185 | 185 | 5.294868 | 3 | 3 | 0.129588 | 3 | 3 | 0.098781 | 11 | 11 | 0.322188 |
| 2 | 26987157..27023935 | CENPA | -22.7007 | 4.13E-17 | 23 | 23 | 0.807797 | 33 | 33 | 1.168936 | 35 | 35 | 1.05831 | 1 | 1 | 0.045636 | 1 | 1 | 0.034787 | 1 | 1 | 0.030944 |
| 8 | 22941868..22974950 | TNFRSF10C | -22.5601 | 8.61E-08 | 8 | 8 | 0.212255 | 16 | 16 | 0.428144 | 12 | 12 | 0.274107 | 0 | 0 | 0 | 1 | 1 | 0.026279 | 0 | 1 | 0.023376 |
| 10 | 61005890..61122939 | FAM13C | -22.4541 | 7.26E-56 | 95 | 109 | 1.124656 | 84 | 99 | 1.030222 | 100 | 138 | 1.225865 | 2 | 3 | 0.04022 | 4 | 5 | 0.051098 | 4 | 4 | 0.036363 |
| 2 | 189839046..189877472 | COL3A1 | -22.1265 | 0 | 53834 | 53834 | 550.0779 | 49982 | 49982 | 515.0905 | 57143 | 57143 | 502.6908 | 1786 | 1786 | 23.7127 | 2231 | 2231 | 22.57907 | 1964 | 1964 | 17.68122 |
| 1 | 111743393..111786062 | CHI3L2 | -21.934 | 3.51E-17 | 29 | 29 | 0.612971 | 21 | 21 | 0.447676 | 38 | 38 | 0.691506 | 1 | 1 | 0.027465 | 0 | 0 | 0 | 2 | 2 | 0.037246 |
| 11 | 7980971..7986973 | NLRP10 | -21.88 | 1.6E-07 | 7 | 7 | 0.192621 | 10 | 10 | 0.277528 | 18 | 18 | 0.42643 | 0 | 0 | 0 | 1 | 1 | 0.027255 | 0 | 0 | 0 |
| X | 3226606..3264682 | MXRA5 | -21.8027 | 7.68E-66 | 1486 | 1584 | 11.26514 | 1447 | 1529 | 10.96708 | 1726 | 1842 | 11.27824 | 33 | 34 | 0.31419 | 69 | 73 | 0.514213 | 76 | 80 | 0.501273 |
| 8 | 67039131..67087720 | TRIM55 | -21.7911 | 9.35E-35 | 50 | 50 | 1.130987 | 56 | 56 | 1.27755 | 87 | 87 | 1.694248 | 1 | 1 | 0.029391 | 1 | 1 | 0.022404 | 5 | 5 | 0.099646 |
| 11 | 114128509..114184007 | NNMT | -21.7371 | 8.3E-186 | 663 | 1633 | 38.96272 | 745 | 1638 | 39.41661 | 864 | 1959 | 40.24091 | 33 | 64 | 1.984153 | 27 | 60 | 1.417925 | 26 | 56 | 1.177211 |
| 10 | 114133776..114188138 | ACSL5 | -21.4448 | 8.39E-17 | 23 | 23 | 0.370973 | 26 | 26 | 0.422951 | 37 | 37 | 0.513791 | 0 | 0 | 0 | 2 | 2 | 0.031951 | 1 | 1 | 0.014211 |
| 1 | 208057594..208084747 | CD34 | -21.2648 | 2.96E-07 | 8 | 8 | 0.141091 | 8 | 8 | 0.142299 | 18 | 18 | 0.273308 | 0 | 0 | 0 | 0 | 0 | 0 | 1 | 1 | 0.015539 |
| 1 | 23707554..23751233 | TCEA3 | -21.2047 | 3.5E-146 | 565 | 565 | 11.1949 | 478 | 478 | 9.552169 | 506 | 506 | 8.631627 | 13 | 13 | 0.334693 | 20 | 20 | 0.392501 | 28 | 28 | 0.488802 |
| 6 | 55921388..56258892 | COL21A1 | -21.1949 | 7.73E-44 | 74 | 74 | 0.727837 | 82 | 82 | 0.813427 | 82 | 82 | 0.694363 | 4 | 4 | 0.05112 | 4 | 4 | 0.038967 | 1 | 1 | 0.008666 |
| 1 | 116654376..116677861 | MAB21L3 | -21.063 | 3.13E-12 | 12 | 12 | 0.256681 | 23 | 23 | 0.496184 | 24 | 24 | 0.441972 | 0 | 0 | 0 | 0 | 0 | 0 | 2 | 2 | 0.037692 |
| 7 | 99756867..99766373 | GAL3ST4 | -21.0111 | 3.3E-145 | 256 | 256 | 5.248577 | 265 | 265 | 5.479612 | 322 | 322 | 5.683656 | 6 | 6 | 0.15984 | 9 | 9 | 0.182761 | 18 | 18 | 0.325145 |
| 19 | 281040..291393 | PPAP2C | -20.9861 | 4.5E-142 | 257 | 257 | 7.761952 | 271 | 271 | 8.254855 | 340 | 340 | 8.840709 | 3 | 3 | 0.117731 | 20 | 20 | 0.598283 | 11 | 11 | 0.292707 |
| 9 | 36169389..36171329 | CCIN | -20.717 | 2.82E-07 | 14 | 14 | 0.502342 | 9 | 9 | 0.325699 | 10 | 10 | 0.308917 | 0 | 0 | 0 | 0 | 0 | 0 | 1 | 1 | 0.031614 |
| 13 | 47405685..47471169 | HTR2A | -20.6978 | 2.36E-06 | 7 | 7 | 0.090416 | 16 | 16 | 0.208434 | 10 | 10 | 0.111203 | 1 | 1 | 0.016783 | 0 | 0 | 0 | 0 | 0 | 0 |
| 22 | 46692638..46726707 | GTSE1 | -20.6266 | 2.59E-76 | 138 | 138 | 2.265716 | 125 | 125 | 2.06985 | 142 | 142 | 2.007175 | 5 | 5 | 0.106667 | 4 | 4 | 0.065047 | 7 | 7 | 0.101258 |
| 9 | 132094579..132121817 | RP11-65J3.1 | -20.6015 | 8.05E-35 | 50 | 50 | 2.184635 | 60 | 60 | 2.644006 | 72 | 72 | 2.708393 | 2 | 2 | 0.113546 | 3 | 3 | 0.129828 | 2 | 2 | 0.076991 |
| 4 | 88394487..88452213 | SPARCL1 | -20.4865 | 5.37E-16 | 31 | 31 | 0.620946 | 22 | 22 | 0.444444 | 29 | 29 | 0.500105 | 1 | 1 | 0.026027 | 1 | 1 | 0.01984 | 1 | 1 | 0.017648 |
| 10 | 106113522..106214848 | CCDC147 | -20.3651 | 3.97E-12 | 18 | 18 | 0.353334 | 17 | 17 | 0.336562 | 22 | 22 | 0.371798 | 0 | 0 | 0 | 0 | 0 | 0 | 2 | 2 | 0.03459 |
| 11 | 68771863..68780877 | MRGPRF | -20.329 | 0 | 2666 | 3471 | 88.03416 | 2479 | 3208 | 82.06033 | 2783 | 3691 | 80.59553 | 100 | 131 | 4.317178 | 113 | 149 | 3.743017 | 110 | 160 | 3.575359 |
| 2 | 202655184..202760273 | CDK15 | -20.2061 | 1.06E-62 | 93 | 93 | 1.054729 | 125 | 125 | 1.429784 | 157 | 157 | 1.53295 | 4 | 4 | 0.058945 | 8 | 8 | 0.089864 | 3 | 3 | 0.029977 |
| 10 | 77360998..78319925 | C10orf11 | -20.1255 | 5.52E-07 | 14 | 14 | 0.15857 | 11 | 11 | 0.125657 | 7 | 8 | 0.07801 | 0 | 0 | 0 | 0 | 0 | 0 | 1 | 1 | 0.009979 |
| 1 | 163236366..163325554 | NUF2 | -20.0684 | 1.99E-32 | 64 | 64 | 1.325804 | 52 | 52 | 1.086438 | 61 | 61 | 1.087927 | 4 | 4 | 0.107669 | 1 | 1 | 0.020518 | 2 | 2 | 0.036503 |
| 3 | 122296449..122357894 | PARP15 | -20.0427 | 1.07E-06 | 4 | 4 | 0.050587 | 13 | 13 | 0.165816 | 15 | 16 | 0.17421 | 0 | 1 | 0.016433 | 0 | 0 | 0 | 1 | 1 | 0.011143 |
| 18 | 57363691..57364644 | RP11-2N1.2 | -19.9973 | 1.36E-19 | 41 | 52 | 9.480628 | 25 | 34 | 6.251943 | 38 | 45 | 7.063446 | 0 | 0 | 0 | 1 | 1 | 0.180581 | 3 | 4 | 0.642535 |
| 20 | 42295754..42345136 | MYBL2 | -19.8476 | 1.75E-49 | 78 | 78 | 2.025503 | 74 | 74 | 1.938083 | 95 | 95 | 2.123891 | 3 | 3 | 0.101226 | 3 | 3 | 0.077161 | 4 | 4 | 0.091517 |
| 8 | 54427731..54436491 | RP11-400K9.4 | -19.7735 | 9.37E-19 | 39 | 49 | 1.429686 | 26 | 38 | 1.118229 | 38 | 57 | 1.431825 | 2 | 3 | 0.113736 | 0 | 0 | 0 | 2 | 4 | 0.102827 |
| 18 | 61420169..61472604 | SERPINB7 | -19.6794 | 1.96E-14 | 23 | 23 | 0.61705 | 22 | 22 | 0.595275 | 34 | 34 | 0.785311 | 3 | 3 | 0.104579 | 0 | 0 | 0 | 0 | 0 | 0 |
| 12 | 48128455..48164823 | RAPGEF3 | -19.4707 | 4.65E-18 | 37 | 47 | 0.272894 | 37 | 45 | 0.263519 | 27 | 35 | 0.174959 | 2 | 6 | 0.045267 | 0 | 6 | 0.034505 | 2 | 7 | 0.035809 |
| 17 | 21279509..21323179 | KCNJ12 | -19.4412 | 9.12E-07 | 9 | 10 | 0.124102 | 9 | 9 | 0.112648 | 13 | 13 | 0.138897 | 0 | 0 | 0 | 1 | 1 | 0.012292 | 0 | 0 | 0 |
| 17 | 8108056..8113918 | AURKB | -19.3587 | 9.63E-32 | 41 | 41 | 1.277054 | 63 | 63 | 1.979102 | 67 | 67 | 1.796679 | 2 | 2 | 0.080945 | 2 | 2 | 0.061701 | 3 | 3 | 0.082328 |
| 9 | 101705461..101833069 | COL15A1 | -19.353 | 9.48E-60 | 144 | 144 | 1.511081 | 138 | 138 | 1.460517 | 119 | 119 | 1.075085 | 5 | 5 | 0.068175 | 9 | 9 | 0.093542 | 3 | 3 | 0.027736 |
| 5 | 176513887..176525145 | FGFR4 | -19.2325 | 1.3E-190 | 987 | 987 | 14.23499 | 906 | 906 | 13.17864 | 938 | 938 | 11.64697 | 31 | 31 | 0.580943 | 39 | 39 | 0.557113 | 53 | 53 | 0.673471 |
| 11 | 60704556..60720002 | SLC15A3 | -19.0305 | 8.7E-118 | 233 | 233 | 2.652428 | 210 | 210 | 2.411067 | 250 | 250 | 2.45018 | 4 | 4 | 0.059167 | 11 | 11 | 0.124028 | 15 | 15 | 0.150446 |
| 11 | 124753587..124768396 | ROBO4 | -18.9455 | 3.64E-10 | 18 | 31 | 0.306986 | 17 | 27 | 0.269664 | 18 | 31 | 0.264295 | 1 | 1 | 0.012867 | 1 | 1 | 0.009808 | 0 | 0 | 0 |
| 1 | 16083102..16113089 | FBLIM1 | -18.908 | 0 | 2187 | 2200 | 32.48972 | 2024 | 2034 | 30.29539 | 2369 | 2378 | 30.23469 | 64 | 64 | 1.228105 | 98 | 98 | 1.433469 | 129 | 130 | 1.691491 |
| 18 | 22305745..22509040 | RP11-449D8.5 | -18.8378 | 1.68E-06 | 9 | 9 | 0.690325 | 10 | 10 | 0.773595 | 11 | 11 | 0.726397 | 0 | 0 | 0 | 0 | 0 | 0 | 1 | 1 | 0.067579 |
| 8 | 144063155..144099854 | RP11-273G15.2 | -18.8069 | 3.22E-06 | 7 | 14 | 0.253062 | 8 | 12 | 0.218767 | 15 | 17 | 0.264556 | 0 | 0 | 0 | 0 | 0 | 0 | 1 | 1 | 0.015926 |
| 4 | 75669969..75719896 | BTC | -18.6058 | 1.14E-10 | 22 | 22 | 0.544111 | 11 | 11 | 0.274384 | 19 | 19 | 0.404565 | 0 | 0 | 0 | 0 | 0 | 0 | 2 | 2 | 0.043581 |
| 16 | 9852376..10276611 | GRIN2A | -18.569 | 3.94E-48 | 65 | 65 | 0.42579 | 82 | 82 | 0.541749 | 107 | 107 | 0.603443 | 2 | 2 | 0.017023 | 5 | 5 | 0.032441 | 4 | 4 | 0.023086 |
| 9 | 22646199..22824212 | RP11-399D6.2 | -18.4498 | 3.42E-13 | 18 | 18 | 0.488174 | 24 | 24 | 0.656471 | 32 | 32 | 0.747175 | 2 | 2 | 0.07048 | 0 | 0 | 0 | 1 | 1 | 0.023895 |
| 1 | 200520628..200589862 | KIF14 | -18.1626 | 6.84E-53 | 79 | 79 | 0.756399 | 84 | 84 | 0.811158 | 107 | 107 | 0.882019 | 3 | 3 | 0.037323 | 6 | 6 | 0.0569 | 3 | 3 | 0.025307 |

| 3 | 12837971..12913415 | CAND2 | -18.0983 | 4.6E-109 | 242 | 249 | 3.165734 | 200 | 202 | 2.590173 | 260 | 262 | 2.867786 | 2 | 2 | 0.03304 | 16 | 16 | 0.201481 | 14 | 14 | 0.156822 |
| --- | --- | --- | --- | --- | --- | --- | --- | --- | --- | --- | --- | --- | --- | --- | --- | --- | --- | --- | --- | --- | --- | --- |
| 9 | 72658497..72841886 | MAMDC2 | -18.0951 | 1.46E-44 | 78 | 107 | 1.933611 | 82 | 108 | 1.968392 | 133 | 154 | 2.395943 | 6 | 8 | 0.187848 | 2 | 3 | 0.053696 | 5 | 10 | 0.159217 |
| 12 | 49717019..49725514 | TROAP | -18.0633 | 4.3E-17 | 33 | 43 | 0.757406 | 28 | 34 | 0.604007 | 33 | 44 | 0.667242 | 1 | 1 | 0.022887 | 2 | 2 | 0.034892 | 1 | 4 | 0.062076 |
| 16 | 57546090..57570511 | CCDC102A | -18.0583 | 3.5E-85 | 292 | 292 | 7.876327 | 233 | 233 | 6.338684 | 236 | 236 | 5.480538 | 10 | 10 | 0.350488 | 10 | 10 | 0.267165 | 15 | 15 | 0.35648 |
| 5 | 141971743..142077617 | FGF1 | -18.0405 | 3.96E-17 | 27 | 108 | 1.489167 | 29 | 122 | 1.69661 | 38 | 138 | 1.638209 | 1 | 7 | 0.125415 | 1 | 6 | 0.081943 | 2 | 10 | 0.121485 |
| 9 | 117782806..117880536 | TNC | -18.0335 | 0 | 17496 | 17496 | 140.2704 | 16567 | 16567 | 133.9595 | 19149 | 19149 | 132.1733 | 656 | 656 | 6.833815 | 820 | 820 | 6.511487 | 983 | 983 | 6.943588 |
| 4 | 159045626..159094470 | FAM198B | -17.9953 | 2.4E-109 | 405 | 732 | 6.469668 | 540 | 819 | 7.300576 | 749 | 1071 | 8.149495 | 22 | 33 | 0.378981 | 19 | 33 | 0.288884 | 36 | 50 | 0.389353 |
| 5 | 169291268..169407744 | FAM196B | -17.8191 | 2.3E-16 | 30 | 164 | 3.808593 | 22 | 153 | 3.583558 | 41 | 210 | 4.198656 | 2 | 8 | 0.241403 | 0 | 7 | 0.161012 | 2 | 2 | 0.040922 |
| 8 | 104383743..104395225 | CTHRC1 | -17.6925 | 2.45E-59 | 1531 | 1531 | 60.03843 | 1483 | 1483 | 58.654 | 1658 | 1658 | 55.97692 | 65 | 65 | 3.312071 | 79 | 79 | 3.068458 | 75 | 75 | 2.591305 |
| 9 | 118916083..119164601 | PAPPA | -17.6482 | 9.4E-146 | 441 | 545 | 3.279802 | 454 | 536 | 3.253256 | 535 | 646 | 3.346987 | 14 | 18 | 0.140752 | 27 | 30 | 0.178818 | 26 | 32 | 0.16967 |
| 16 | 67515217..67521153 | RP11-297D21.4 | -17.6314 | 6.19E-06 | 9 | 9 | 0.553235 | 13 | 13 | 0.805959 | 6 | 6 | 0.317533 | 0 | 0 | 0 | 1 | 1 | 0.060884 | 0 | 0 | 0 |
| 17 | 43268298..43299589 | CTD-2020K17.1 | -17.6206 | 6.06E-06 | 13 | 27 | 0.505632 | 7 | 27 | 0.509961 | 8 | 29 | 0.467562 | 0 | 1 | 0.024333 | 0 | 0 | 0 | 1 | 1 | 0.0165 |
| 17 | 72666717..72743474 | RAB37 | -17.6129 | 0.001508 | 2 | 2 | 0.027452 | 19 | 19 | 0.263028 | 7 | 7 | 0.082721 | 1 | 1 | 0.017835 | 0 | 0 | 0 | 0 | 0 | 0 |
| 12 | 673462..772945 | NINJ2 | -17.6025 | 3.81E-05 | 11 | 12 | 0.408083 | 9 | 9 | 0.308683 | 8 | 9 | 0.2635 | 1 | 1 | 0.044187 | 0 | 0 | 0 | 0 | 0 | 0 |
| 7 | 150488373..150498448 | TMEM176B | -17.5529 | 3.87E-28 | 47 | 48 | 1.689245 | 46 | 47 | 1.668213 | 62 | 63 | 1.908808 | 2 | 2 | 0.091456 | 3 | 3 | 0.104571 | 2 | 2 | 0.062013 |
| 1 | 177897923..178007142 | RP4-798P15.3 | -17.5386 | 5.14E-10 | 14 | 29 | 0.257587 | 18 | 51 | 0.456876 | 17 | 36 | 0.275295 | 0 | 0 | 0 | 0 | 0 | 0 | 2 | 3 | 0.023477 |
| 3 | 187086120..187089864 | RTP4 | -17.5016 | 5.71E-21 | 32 | 32 | 1.434155 | 43 | 43 | 1.943645 | 37 | 37 | 1.427638 | 1 | 1 | 0.058234 | 1 | 1 | 0.04439 | 3 | 3 | 0.11846 |
| 17 | 66863433..66951533 | ABCA8 | -17.499 | 6.7E-147 | 331 | 331 | 2.751597 | 362 | 362 | 3.035063 | 485 | 486 | 3.478271 | 24 | 24 | 0.259239 | 14 | 14 | 0.115272 | 17 | 17 | 0.124511 |
| 17 | 66531254..66597530 | FAM20A | -17.4771 | 6.22E-62 | 120 | 370 | 4.154292 | 115 | 346 | 3.918084 | 198 | 454 | 4.388555 | 7 | 16 | 0.233425 | 8 | 24 | 0.266898 | 5 | 22 | 0.217631 |
| 20 | 23026270..23030378 | THBD | -17.4654 | 7.02E-36 | 67 | 67 | 1.135627 | 60 | 60 | 1.025686 | 69 | 69 | 1.006886 | 4 | 4 | 0.088095 | 0 | 0 | 0 | 5 | 5 | 0.074668 |
| 12 | 52300692..52317145 | ACVRL1 | -17.3827 | 2E-147 | 507 | 507 | 7.006071 | 453 | 453 | 6.313455 | 506 | 506 | 6.019875 | 20 | 20 | 0.359111 | 19 | 19 | 0.260051 | 31 | 31 | 0.377426 |
| 7 | 144052381..144077725 | ARHGEF5 | -17.3288 | 1.44E-64 | 126 | 369 | 4.417228 | 114 | 366 | 4.418825 | 120 | 353 | 3.638048 | 4 | 14 | 0.217763 | 2 | 5 | 0.059283 | 11 | 31 | 0.326955 |
| 10 | 62538089..62554610 | CDK1 | -17.3253 | 2.49E-28 | 39 | 39 | 0.694858 | 61 | 61 | 1.096134 | 74 | 74 | 1.135098 | 0 | 0 | 0 | 4 | 4 | 0.070588 | 4 | 4 | 0.062791 |
| 3 | 49924435..49941299 | MST1R | -17.3133 | 7.43E-13 | 24 | 36 | 0.478029 | 27 | 38 | 0.508906 | 18 | 25 | 0.2858 | 0 | 0 | 0 | 1 | 4 | 0.052608 | 2 | 2 | 0.023398 |
| 11 | 119209652..119217383 | C1QTNF5 | -17.3053 | 6.32E-71 | 202 | 1263 | 22.45675 | 178 | 1215 | 21.78824 | 166 | 1181 | 18.07856 | 10 | 71 | 1.64034 | 10 | 88 | 1.549763 | 6 | 67 | 1.049594 |
| 1 | 209959036..209979465 | IRF6 | -17.2632 | 2.09E-22 | 30 | 36 | 0.523218 | 41 | 49 | 0.718255 | 61 | 65 | 0.813325 | 1 | 2 | 0.03777 | 2 | 2 | 0.028791 | 3 | 3 | 0.038415 |
| 1 | 203136939..203144941 | MYBPH | -17.1962 | 2.45E-27 | 74 | 74 | 2.855299 | 66 | 66 | 2.568421 | 51 | 51 | 1.694183 | 2 | 2 | 0.100273 | 3 | 3 | 0.114652 | 4 | 4 | 0.135983 |
| X | 71130938..71363424 | NHSL2 | -17.0102 | 2.9E-108 | 235 | 238 | 3.314494 | 209 | 210 | 2.949592 | 236 | 238 | 2.853564 | 5 | 5 | 0.090478 | 17 | 18 | 0.248286 | 11 | 11 | 0.13497 |
| 8 | 119935796..119964439 | TNFRSF11B | -16.8566 | 0 | 3932 | 3932 | 96.869 | 3964 | 3964 | 98.49344 | 4969 | 4969 | 105.3927 | 159 | 159 | 5.089798 | 229 | 229 | 5.587864 | 245 | 245 | 5.317904 |
| 1 | 43824626..43828874 | CDC20 | -16.7942 | 4.7E-109 | 205 | 210 | 7.176493 | 186 | 191 | 6.583073 | 243 | 248 | 7.296506 | 9 | 9 | 0.399639 | 7 | 7 | 0.236935 | 15 | 15 | 0.451635 |
| 17 | 48241575..48253292 | SGCA | -16.6501 | 1.63E-22 | 33 | 35 | 0.994133 | 40 | 41 | 1.174527 | 54 | 55 | 1.344961 | 1 | 1 | 0.036907 | 3 | 3 | 0.084399 | 2 | 3 | 0.075076 |
| 1 | 177975271..178007085 | RP11-568K15.1 | -16.5718 | 1.85E-24 | 40 | 117 | 1.464522 | 38 | 126 | 1.59068 | 69 | 203 | 2.187643 | 3 | 12 | 0.195175 | 1 | 9 | 0.111581 | 3 | 15 | 0.165426 |
| 6 | 169558187..169563019 | RP11-417E7.1 | -16.5476 | 6.29E-35 | 61 | 61 | 4.030755 | 65 | 65 | 4.331838 | 80 | 80 | 4.551105 | 3 | 3 | 0.257579 | 6 | 6 | 0.392687 | 1 | 1 | 0.058218 |
| 14 | 101003486..101053750 | BEGAIN | -16.5219 | 2.63E-12 | 21 | 21 | 0.206782 | 24 | 24 | 0.238346 | 21 | 23 | 0.194981 | 0 | 0 | 0 | 3 | 3 | 0.029259 | 0 | 0 | 0 |
| 5 | 166711804..167691162 | TENM2 | -16.5146 | 2.52E-12 | 23 | 26 | 0.163503 | 22 | 23 | 0.145876 | 21 | 21 | 0.113695 | 1 | 1 | 0.008171 | 2 | 2 | 0.012457 | 0 | 0 | 0 |
| 10 | 5976233..5987863 | RP11-536K7.3 | -16.459 | 1.18E-08 | 15 | 31 | 0.551899 | 15 | 25 | 0.448891 | 16 | 31 | 0.47515 | 1 | 6 | 0.138797 | 1 | 7 | 0.123434 | 0 | 7 | 0.109799 |
| 5 | 82933624..83017432 | HAPLN1 | -16.4464 | 3.17E-09 | 11 | 11 | 0.110136 | 15 | 15 | 0.151472 | 20 | 20 | 0.1724 | 0 | 0 | 0 | 1 | 1 | 0.009917 | 1 | 1 | 0.008821 |
| 4 | 186990306..187009223 | TLR3 | -16.4464 | 1.98E-22 | 31 | 31 | 0.321093 | 46 | 46 | 0.48054 | 69 | 69 | 0.615303 | 2 | 2 | 0.026917 | 0 | 0 | 0 | 5 | 5 | 0.045629 |
| 17 | 25956824..25976586 | LGALS9 | -16.4173 | 3.76E-36 | 98 | 110 | 1.340755 | 59 | 65 | 0.799047 | 107 | 108 | 1.133316 | 2 | 2 | 0.031675 | 8 | 9 | 0.108652 | 3 | 3 | 0.032217 |
| 4 | 86936276..87515284 | MAPK10 | -16.4089 | 1.02E-45 | 63 | 64 | 0.454091 | 83 | 83 | 0.593941 | 98 | 98 | 0.598631 | 3 | 3 | 0.027658 | 5 | 5 | 0.035138 | 4 | 4 | 0.025005 |
| 11 | 68779751..68785915 | RP11-554A11.6 | -16.3775 | 0.000128 | 13 | 18 | 0.586631 | 7 | 8 | 0.262957 | 6 | 7 | 0.196409 | 1 | 2 | 0.084694 | 0 | 0 | 0 | 0 | 0 | 0 |
| 1 | 201328136..201346890 | TNNT2 | -16.3589 | 0.00012 | 11 | 11 | 0.10522 | 7 | 7 | 0.067532 | 8 | 8 | 0.065882 | 1 | 1 | 0.012429 | 0 | 0 | 0 | 0 | 0 | 0 |
| 17 | 74466973..74497872 | RHBDF2 | -16.355 | 1.13E-43 | 72 | 72 | 0.72391 | 64 | 64 | 0.648984 | 87 | 87 | 0.753081 | 1 | 1 | 0.013064 | 4 | 4 | 0.039834 | 6 | 6 | 0.05315 |
| 21 | 45879814..45882078 | LRRC3DN | -16.3518 | 1.99E-05 | 5 | 5 | 0.153744 | 11 | 11 | 0.341133 | 10 | 10 | 0.264728 | 0 | 0 | 0 | 1 | 1 | 0.030456 | 0 | 0 | 0 |
| 7 | 150642049..150675403 | KCNH2 | -16.345 | 1.98E-05 | 5 | 5 | 0.049627 | 10 | 10 | 0.100103 | 11 | 11 | 0.093996 | 0 | 0 | 0 | 1 | 1 | 0.009831 | 0 | 0 | 0 |
| 14 | 24834879..24848810 | NFATC4 | -16.3381 | 6.9E-227 | 1426 | 1426 | 11.77141 | 1415 | 1415 | 11.78061 | 1468 | 1468 | 10.43291 | 57 | 57 | 0.611387 | 77 | 77 | 0.629562 | 86 | 86 | 0.625476 |
| 1 | 16384264..16400127 | FAM131C | -16.2881 | 2.64E-11 | 27 | 28 | 1.146439 | 21 | 22 | 0.908485 | 17 | 19 | 0.669756 | 2 | 2 | 0.106403 | 1 | 1 | 0.040554 | 0 | 0 | 0 |
| 6 | 139561198..139613276 | TXLNB | -16.2547 | 6.43E-33 | 52 | 115 | 1.622303 | 55 | 136 | 1.934974 | 76 | 163 | 1.979666 | 4 | 5 | 0.091651 | 3 | 6 | 0.083835 | 2 | 8 | 0.099432 |
| 14 | 24867992..24888494 | NYNRIN | -16.2339 | 5.43E-52 | 1064 | 1064 | 9.315337 | 1078 | 1078 | 9.518709 | 1184 | 1184 | 8.924399 | 51 | 51 | 0.580175 | 53 | 53 | 0.459591 | 66 | 66 | 0.509101 |

| 1 | 38022520..38032458 | DNALI1 | -16.2258 | 4.55E-89 | 164 | 164 | 2.563278 | 151 | 151 | 2.380297 | 179 | 179 | 2.408659 | 5 | 5 | 0.101544 | 7 | 7 | 0.108365 | 13 | 13 | 0.179019 |
| --- | --- | --- | --- | --- | --- | --- | --- | --- | --- | --- | --- | --- | --- | --- | --- | --- | --- | --- | --- | --- | --- | --- |
| 17 | 7163222..7167302 | CLDN7 | -16.1454 | 3.42E-15 | 32 | 38 | 1.06202 | 19 | 32 | 0.901989 | 33 | 43 | 1.034637 | 0 | 0 | 0 | 2 | 2 | 0.055363 | 2 | 2 | 0.049247 |
| 5 | 138855119..138862520 | TMEM173 | -16.1452 | 1.82E-48 | 826 | 826 | 14.94227 | 894 | 894 | 16.31084 | 987 | 987 | 15.37177 | 39 | 39 | 0.916712 | 45 | 45 | 0.806284 | 55 | 55 | 0.876601 |
| 19 | 35629712..35634013 | FXYD1 | -16.0733 | 2.18E-49 | 88 | 105 | 4.060436 | 83 | 102 | 3.978194 | 86 | 101 | 3.362599 | 1 | 2 | 0.100495 | 5 | 5 | 0.19151 | 7 | 9 | 0.30664 |
| 17 | 76210267..76221717 | BIRC5 | -16.0475 | 9.37E-43 | 97 | 232 | 4.235362 | 71 | 189 | 3.4799 | 89 | 229 | 3.59922 | 4 | 16 | 0.379537 | 4 | 12 | 0.216982 | 5 | 15 | 0.241266 |
| 1 | 40766159..40783488 | COL9A2 | -16.0024 | 2.05E-22 | 52 | 52 | 0.872464 | 51 | 51 | 0.863012 | 37 | 37 | 0.534462 | 1 | 1 | 0.021801 | 4 | 4 | 0.066473 | 2 | 2 | 0.029565 |
| 1 | 203059782..203136533 | ADORA1 | -15.8746 | 1.32E-78 | 152 | 156 | 2.592412 | 139 | 144 | 2.413483 | 154 | 158 | 2.260512 | 5 | 5 | 0.107965 | 12 | 12 | 0.197515 | 6 | 6 | 0.087848 |
| 19 | 4903092..4962165 | UHRF1 | -15.8162 | 3.05E-96 | 243 | 370 | 5.009541 | 187 | 303 | 4.13753 | 241 | 378 | 4.40614 | 9 | 19 | 0.334258 | 10 | 18 | 0.241384 | 16 | 29 | 0.345937 |
| 7 | 73442119..73484237 | ELN | -15.7702 | 5.01E-88 | 1983 | 1999 | 21.28136 | 1840 | 1860 | 19.97109 | 2040 | 2055 | 18.83514 | 80 | 80 | 1.106646 | 110 | 110 | 1.159894 | 120 | 122 | 1.144325 |
| 1 | 161475220..161493803 | FCGR2A | -15.7509 | 3.93E-05 | 13 | 25 | 0.327654 | 4 | 18 | 0.237931 | 8 | 27 | 0.304656 | 0 | 2 | 0.034059 | 1 | 1 | 0.012981 | 0 | 1 | 0.011547 |
| 16 | 30996519..31000473 | HSD3B7 | -15.7308 | 1.2E-122 | 589 | 623 | 17.3281 | 567 | 603 | 16.91541 | 664 | 693 | 16.59458 | 20 | 23 | 0.831233 | 37 | 40 | 1.10195 | 39 | 41 | 1.004731 |
| 1 | 28918712..28921955 | RAB42 | -15.7095 | 3.72E-05 | 8 | 68 | 2.172449 | 4 | 66 | 2.126605 | 13 | 79 | 2.172892 | 0 | 3 | 0.124536 | 1 | 5 | 0.158216 | 0 | 4 | 0.112591 |
| 1 | 95285898..95360802 | SLC44A3 | -15.6838 | 2.86E-16 | 30 | 30 | 0.728262 | 24 | 24 | 0.587598 | 47 | 47 | 0.982279 | 3 | 3 | 0.094628 | 2 | 2 | 0.048088 | 0 | 0 | 0 |
| 20 | 3648612..3662893 | ADAM33 | -15.6357 | 1.46E-85 | 1630 | 1630 | 21.07747 | 1680 | 1680 | 21.91 | 1750 | 1750 | 19.48225 | 70 | 70 | 1.176145 | 88 | 88 | 1.127074 | 112 | 112 | 1.276004 |
| 10 | 7601232..7708961 | ITIH5 | -15.501 | 3.6E-100 | 195 | 195 | 0.928361 | 169 | 169 | 0.811468 | 221 | 221 | 0.905827 | 8 | 8 | 0.049489 | 12 | 12 | 0.056585 | 11 | 13 | 0.054529 |
| 5 | 148303202..148442726 | SH3TC2 | -15.4808 | 1.44E-10 | 20 | 20 | 0.092571 | 16 | 16 | 0.074691 | 26 | 26 | 0.103607 | 2 | 2 | 0.012028 | 1 | 1 | 0.004584 | 0 | 0 | 0 |
| 22 | 27042392..27072438 | MIAT | -15.4713 | 2.82E-24 | 50 | 271 | 1.628482 | 44 | 259 | 1.569697 | 42 | 228 | 1.179557 | 1 | 12 | 0.093697 | 4 | 32 | 0.19046 | 2 | 23 | 0.121771 |
| 12 | 52562780..52585784 | KRT80 | -15.3999 | 1.87E-08 | 20 | 20 | 0.320212 | 6 | 6 | 0.096886 | 17 | 17 | 0.23433 | 0 | 0 | 0 | 1 | 1 | 0.015858 | 1 | 1 | 0.014106 |
| 14 | 55614830..55658396 | DLGAP5 | -15.3872 | 6.26E-79 | 127 | 127 | 2.41207 | 136 | 136 | 2.605118 | 170 | 170 | 2.779748 | 6 | 6 | 0.148071 | 11 | 11 | 0.206927 | 6 | 6 | 0.100402 |
| 14 | 75408537..75422487 | PGF | -15.2658 | 9.37E-36 | 68 | 68 | 0.794354 | 75 | 75 | 0.883627 | 64 | 64 | 0.643658 | 1 | 1 | 0.015179 | 3 | 3 | 0.034711 | 7 | 7 | 0.072045 |
| 17 | 7452208..7464925 | TNFSF12 | -15.2344 | 1.9E-122 | 345 | 708 | 15.65877 | 285 | 592 | 13.20531 | 341 | 782 | 14.89024 | 9 | 18 | 0.517284 | 16 | 53 | 1.161019 | 28 | 60 | 1.169173 |
| 10 | 127700950..128077024 | ADAM12 | -15.2252 | 3.94E-63 | 1264 | 1264 | 8.928269 | 1244 | 1244 | 8.862228 | 1507 | 1507 | 9.164395 | 52 | 52 | 0.477261 | 75 | 75 | 0.524711 | 92 | 92 | 0.572547 |
| 11 | 7506619..7532608 | OLFML1 | -15.2235 | 4.44E-72 | 116 | 583 | 11.81714 | 150 | 642 | 13.12446 | 162 | 762 | 13.29748 | 8 | 51 | 1.343217 | 3 | 36 | 0.722746 | 12 | 64 | 1.14295 |
| 1 | 170429594..170501788 | RP11-576I22.2 | -15.1278 | 0.000387 | 6 | 8 | 0.174935 | 12 | 14 | 0.308758 | 6 | 6 | 0.112956 | 1 | 1 | 0.028413 | 0 | 1 | 0.021658 | 0 | 1 | 0.019266 |
| 9 | 127539437..127577164 | OLFML2A | -15.1248 | 0 | 2143 | 2147 | 22.16577 | 2152 | 2152 | 22.4076 | 2504 | 2506 | 22.2742 | 103 | 103 | 1.38172 | 127 | 127 | 1.298654 | 143 | 143 | 1.300738 |
| 1 | 193148175..193155784 | B3GALT2 | -15.1201 | 6.47E-05 | 8 | 52 | 1.10617 | 7 | 66 | 1.416005 | 9 | 80 | 1.465139 | 0 | 4 | 0.110563 | 0 | 1 | 0.02107 | 1 | 8 | 0.149938 |
| 1 | 32256023..32281652 | SPOCD1 | -15.0796 | 5.2E-188 | 1013 | 1323 | 13.0052 | 1015 | 1300 | 12.88852 | 1059 | 1359 | 11.5013 | 50 | 65 | 0.830238 | 63 | 72 | 0.701017 | 57 | 84 | 0.727511 |
| 15 | 59397277..59417244 | CCNB2 | -15.0696 | 6.81E-46 | 69 | 74 | 2.824008 | 76 | 87 | 3.348543 | 116 | 129 | 4.238325 | 2 | 2 | 0.099174 | 6 | 6 | 0.22679 | 6 | 7 | 0.235361 |
| 2 | 128395956..128439360 | LIMS2 | -15.0339 | 6.5E-183 | 372 | 372 | 3.052712 | 380 | 380 | 3.145059 | 447 | 447 | 3.158063 | 12 | 12 | 0.127955 | 26 | 26 | 0.211327 | 28 | 28 | 0.202444 |
| 2 | 74119441..74146992 | ACTG2 | -14.9888 | 2E-148 | 421 | 421 | 7.693789 | 445 | 445 | 8.202014 | 607 | 607 | 9.550304 | 19 | 19 | 0.451174 | 25 | 25 | 0.452519 | 37 | 37 | 0.595749 |
| 7 | 22765503..22771621 | IL6 | -14.9188 | 2.39E-41 | 76 | 81 | 2.080907 | 67 | 70 | 1.813711 | 97 | 114 | 2.521406 | 5 | 5 | 0.166905 | 6 | 6 | 0.152671 | 2 | 2 | 0.045269 |
| 5 | 149675906..149718870 | ARSI | -14.9005 | 1.1E-108 | 242 | 242 | 5.155818 | 249 | 249 | 5.350371 | 251 | 251 | 4.603904 | 19 | 19 | 0.525978 | 11 | 11 | 0.232121 | 11 | 11 | 0.20648 |
| 5 | 156512843..156569880 | HAVCR2 | -14.8369 | 1.26E-19 | 37 | 43 | 0.787272 | 33 | 39 | 0.720151 | 43 | 46 | 0.725078 | 3 | 3 | 0.071369 | 0 | 0 | 0 | 3 | 4 | 0.064524 |
| 20 | 44034697..44039250 | DBNDD2 | -14.8065 | 2.1E-65 | 122 | 364 | 9.171925 | 102 | 336 | 8.538876 | 139 | 404 | 8.76417 | 8 | 30 | 0.982228 | 5 | 24 | 0.598976 | 7 | 34 | 0.754816 |
| 9 | 129849611..129885162 | ANGPTL2 | -14.7955 | 0 | 2396 | 9655 | 172.9066 | 2212 | 8827 | 159.4317 | 2493 | 9982 | 153.903 | 97 | 383 | 8.912305 | 144 | 495 | 8.780179 | 160 | 619 | 9.766815 |
| 2 | 202047604..202094129 | CASP10 | -14.7923 | 3.43E-46 | 76 | 77 | 0.705811 | 75 | 75 | 0.693364 | 86 | 86 | 0.678682 | 1 | 1 | 0.01191 | 6 | 6 | 0.054474 | 6 | 6 | 0.048457 |
| 15 | 40453224..40513337 | BUB1B | -14.7035 | 2.43E-50 | 95 | 99 | 1.540431 | 80 | 84 | 1.318222 | 96 | 108 | 1.446775 | 4 | 4 | 0.080872 | 5 | 5 | 0.077058 | 6 | 7 | 0.095964 |
| 8 | 80523049..80578410 | STMN2 | -14.696 | 3.31E-08 | 12 | 12 | 0.353833 | 15 | 15 | 0.446078 | 14 | 14 | 0.355399 | 0 | 0 | 0 | 1 | 1 | 0.029205 | 1 | 1 | 0.025979 |
| 19 | 11242196..11266484 | SPC24 | -14.6889 | 2.18E-59 | 111 | 111 | 2.723044 | 104 | 104 | 2.573164 | 108 | 109 | 2.302123 | 3 | 3 | 0.095628 | 7 | 7 | 0.170086 | 8 | 8 | 0.172912 |
| 17 | 39679869..39684560 | KRT19 | -14.6853 | 8.7E-113 | 269 | 270 | 8.049855 | 303 | 304 | 9.141137 | 279 | 282 | 7.238419 | 14 | 14 | 0.542356 | 18 | 18 | 0.53154 | 16 | 16 | 0.420288 |
| 2 | 238232646..238323018 | COL6A3 | -14.6562 | 0 | 122278 | 122279 | 433.9718 | 114786 | 114787 | 410.8702 | 128724 | 128726 | 393.3202 | 5761 | 5763 | 26.57604 | 7272 | 7295 | 25.6433 | 7687 | 7688 | 24.03954 |
| 14 | 103589779..103603776 | TNFAIP2 | -14.6228 | 9E-196 | 1168 | 1168 | 16.17552 | 1108 | 1108 | 15.47596 | 1191 | 1191 | 14.2003 | 58 | 58 | 1.0437 | 69 | 69 | 0.946463 | 70 | 70 | 0.854116 |
| 4 | 77356253..77704406 | SHROOM3 | -14.6165 | 4.3E-232 | 1504 | 1784 | 9.442111 | 1295 | 1600 | 8.540761 | 1523 | 1935 | 8.817095 | 75 | 91 | 0.625817 | 85 | 105 | 0.550431 | 85 | 100 | 0.466313 |
| 11 | 64494383..64512928 | RASGRP2 | -14.6035 | 1.06E-13 | 27 | 27 | 0.309081 | 19 | 19 | 0.219363 | 30 | 30 | 0.295665 | 1 | 1 | 0.014874 | 2 | 2 | 0.022677 | 1 | 1 | 0.010086 |
| 16 | 74705753..74734858 | MLKL | -14.6009 | 2.84E-61 | 118 | 118 | 1.443824 | 96 | 96 | 1.184693 | 126 | 126 | 1.327312 | 6 | 6 | 0.095393 | 9 | 9 | 0.109072 | 4 | 4 | 0.043122 |
| 2 | 234742062..234763212 | HJURP | -14.578 | 2.91E-56 | 99 | 99 | 1.805438 | 86 | 86 | 1.581788 | 119 | 119 | 1.868378 | 2 | 2 | 0.047392 | 5 | 5 | 0.090314 | 10 | 10 | 0.160676 |
| X | 103028647..103047548 | PLP1 | -14.5171 | 0.000127 | 12 | 12 | 0.137505 | 4 | 4 | 0.046227 | 7 | 7 | 0.069057 | 0 | 0 | 0 | 0 | 0 | 0 | 1 | 1 | 0.010096 |
| 17 | 74523668..74549660 | PRCD | -14.4934 | 0.000122 | 4 | 43 | 0.564521 | 10 | 36 | 0.476669 | 9 | 43 | 0.486016 | 0 | 2 | 0.034117 | 1 | 1 | 0.013003 | 0 | 0 | 0 |
| X | 109602044..109699562 | RGAG1 | -14.4802 | 0.000652 | 5 | 5 | 0.062983 | 8 | 8 | 0.101635 | 10 | 10 | 0.108448 | 1 | 1 | 0.016368 | 0 | 0 | 0 | 0 | 0 | 0 |

| 1 | 170631869..170708560 | PRRX1 | -14.4316 | 0 | 2975 | 2975 | 25.12701 | 3284 | 3284 | 27.9743 | 3724 | 3724 | 27.07907 | 154 | 154 | 1.690077 | 197 | 197 | 1.648007 | 223 | 223 | 1.659441 |
| --- | --- | --- | --- | --- | --- | --- | --- | --- | --- | --- | --- | --- | --- | --- | --- | --- | --- | --- | --- | --- | --- | --- |
| 12 | 57853918..57866045 | GLI1 | -14.4163 | 1.85E-13 | 23 | 23 | 0.381033 | 20 | 20 | 0.334169 | 32 | 32 | 0.45641 | 0 | 0 | 0 | 0 | 0 | 0 | 4 | 4 | 0.058384 |
| 8 | 37278859..37411701 | RP11-150O12.1 | -14.4017 | 1.33E-15 | 33 | 33 | 1.510068 | 34 | 34 | 1.569147 | 25 | 25 | 0.984902 | 2 | 2 | 0.118917 | 3 | 3 | 0.13597 | 0 | 0 | 0 |
| 22 | 51007290..51017899 | CPT1B | -14.3572 | 6.35E-08 | 13 | 24 | 0.372439 | 16 | 28 | 0.438233 | 11 | 27 | 0.360727 | 0 | 0 | 0 | 1 | 2 | 0.030741 | 1 | 2 | 0.027345 |
| X | 132434131..132549518 | GPC4 | -14.3516 | 1.31E-27 | 57 | 57 | 0.785017 | 48 | 48 | 0.666727 | 56 | 56 | 0.663992 | 3 | 3 | 0.053686 | 4 | 4 | 0.054564 | 2 | 2 | 0.024268 |
| 2 | 131594489..131804836 | ARHGEF4 | -14.3379 | 5.9E-08 | 13 | 13 | 0.090513 | 12 | 12 | 0.084266 | 15 | 15 | 0.089914 | 0 | 0 | 0 | 0 | 0 | 0 | 2 | 2 | 0.012269 |
| 5 | 55147207..55218678 | IL31RA | -14.2312 | 4.9E-10 | 13 | 13 | 0.205773 | 17 | 17 | 0.271391 | 27 | 27 | 0.367941 | 1 | 1 | 0.020567 | 1 | 1 | 0.015678 | 1 | 1 | 0.013946 |
| 11 | 5710919..5758319 | TRIM22 | -14.0867 | 2.8E-174 | 446 | 962 | 11.1295 | 443 | 963 | 11.23645 | 541 | 1246 | 12.41049 | 19 | 40 | 0.601302 | 30 | 57 | 0.653152 | 35 | 80 | 0.815443 |
| X | 102754678..102774417 | RAB40A | -14.0781 | 8.17E-08 | 8 | 20 | 0.409924 | 30 | 45 | 0.930226 | 18 | 30 | 0.529377 | 1 | 2 | 0.053264 | 0 | 0 | 0 | 2 | 4 | 0.072233 |
| 12 | 53662083..53687427 | ESPL1 | -14.0764 | 3.77E-33 | 67 | 67 | 0.524892 | 66 | 66 | 0.521485 | 76 | 76 | 0.512601 | 4 | 4 | 0.040718 | 8 | 8 | 0.062076 | 0 | 0 | 0 |
| 1 | 190066792..190446759 | BRINP3 | -13.9055 | 5.88E-28 | 51 | 52 | 1.053097 | 52 | 53 | 1.082538 | 88 | 89 | 1.551763 | 4 | 4 | 0.105258 | 6 | 6 | 0.120353 | 1 | 1 | 0.017843 |
| 1 | 172109461..172113934 | DNM3OS | -13.8949 | 0.00022 | 6 | 9 | 1.103548 | 10 | 12 | 1.483995 | 6 | 10 | 1.055648 | 0 | 0 | 0 | 0 | 0 | 0 | 1 | 1 | 0.108032 |
| 17 | 48348767..48358844 | TMEM92 | -13.885 | 0.000217 | 8 | 8 | 0.17979 | 7 | 7 | 0.158663 | 7 | 7 | 0.135439 | 0 | 0 | 0 | 1 | 1 | 0.022259 | 0 | 0 | 0 |
| 4 | 137717877..138133953 | RP11-138I17.1 | -13.8479 | 0.000228 | 4 | 4 | 0.143971 | 5 | 5 | 0.181505 | 13 | 13 | 0.402837 | 0 | 0 | 0 | 0 | 0 | 0 | 1 | 1 | 0.031712 |
| 9 | 5510545..5571282 | PDCD1LG2 | -13.8292 | 3.44E-49 | 72 | 72 | 2.073831 | 104 | 104 | 3.021179 | 113 | 113 | 2.802139 | 5 | 5 | 0.18713 | 5 | 5 | 0.142643 | 7 | 7 | 0.177641 |
| 3 | 150803484..151154860 | MED12L | -13.707 | 9.39E-09 | 15 | 17 | 0.093826 | 12 | 16 | 0.089062 | 28 | 38 | 0.180562 | 2 | 2 | 0.014343 | 1 | 1 | 0.005467 | 0 | 0 | 0 |
| 20 | 43343485..43357150 | WISP2 | -13.6836 | 4.24E-73 | 169 | 351 | 4.90781 | 140 | 280 | 3.94858 | 155 | 299 | 3.599334 | 5 | 13 | 0.236187 | 10 | 18 | 0.249283 | 13 | 16 | 0.197108 |
| 1 | 145549230..145568526 | ANKRD35 | -13.6704 | 1.2E-110 | 318 | 318 | 6.627013 | 308 | 308 | 6.473568 | 294 | 294 | 5.274829 | 13 | 13 | 0.352019 | 23 | 23 | 0.474742 | 20 | 20 | 0.367218 |
| 5 | 75699074..76003957 | IQGAP2 | -13.6606 | 1.94E-63 | 107 | 138 | 1.215988 | 118 | 154 | 1.36859 | 126 | 182 | 1.380676 | 8 | 14 | 0.160291 | 9 | 9 | 0.078547 | 4 | 5 | 0.038817 |
| 1 | 153519805..153521848 | S100A3 | -13.5655 | 1.18E-13 | 18 | 43 | 3.1359 | 38 | 58 | 4.266032 | 31 | 53 | 3.327668 | 3 | 5 | 0.473801 | 1 | 4 | 0.28893 | 1 | 2 | 0.128507 |
| 20 | 62605466..62611361 | SAMD10 | -13.5408 | 1.32E-09 | 19 | 61 | 1.731926 | 18 | 63 | 1.804025 | 17 | 57 | 1.3933 | 0 | 0 | 0 | 1 | 4 | 0.112486 | 2 | 5 | 0.125076 |
| 16 | 3018025..3030540 | PKMYT1 | -13.4377 | 1E-49 | 87 | 101 | 1.39735 | 79 | 88 | 1.227917 | 98 | 106 | 1.262584 | 4 | 7 | 0.125839 | 4 | 6 | 0.082219 | 8 | 10 | 0.121895 |
| 1 | 156863490..156886226 | PEAR1 | -13.436 | 7.3E-173 | 400 | 400 | 5.037696 | 445 | 445 | 5.652419 | 535 | 535 | 5.80091 | 14 | 14 | 0.229104 | 41 | 41 | 0.51144 | 30 | 30 | 0.332887 |
| 11 | 61664773..61687741 | RAB3IL1 | -13.4241 | 2.1E-213 | 1561 | 1561 | 36.16688 | 1398 | 1398 | 32.66763 | 1511 | 1511 | 30.13998 | 64 | 64 | 1.926727 | 106 | 106 | 2.432501 | 109 | 109 | 2.22504 |
| 20 | 46285092..46415360 | SULF2 | -13.4 | 4.7E-170 | 456 | 458 | 4.791639 | 429 | 432 | 4.558318 | 469 | 474 | 4.269404 | 20 | 20 | 0.271882 | 27 | 27 | 0.279783 | 37 | 37 | 0.341054 |
| 1 | 177893091..177953438 | SEC16B | -13.3512 | 8.52E-19 | 38 | 93 | 0.878012 | 30 | 83 | 0.790311 | 50 | 112 | 0.910344 | 3 | 10 | 0.122673 | 4 | 14 | 0.130913 | 0 | 3 | 0.024954 |
| 14 | 105992940..105996539 | TMEM121 | -13.3071 | 4.85E-21 | 40 | 40 | 1.463154 | 52 | 52 | 1.918385 | 41 | 41 | 1.291173 | 3 | 3 | 0.142588 | 2 | 2 | 0.07246 | 3 | 3 | 0.096684 |
| 1 | 20915441..20945401 | CDA | -13.2881 | 3E-12 | 20 | 20 | 1.446441 | 26 | 26 | 1.896472 | 23 | 23 | 1.432086 | 1 | 1 | 0.093973 | 0 | 0 | 0 | 3 | 3 | 0.191159 |
| 15 | 78268384..78285399 | ADAMTS7P3 | -13.2834 | 1.38E-06 | 17 | 33 | 0.611581 | 11 | 21 | 0.39252 | 9 | 20 | 0.31911 | 2 | 3 | 0.072243 | 0 | 2 | 0.036712 | 0 | 1 | 0.016328 |
| 14 | 67853700..67878917 | PLEK2 | -13.2751 | 2.16E-06 | 10 | 10 | 0.434474 | 16 | 16 | 0.70111 | 11 | 11 | 0.411459 | 1 | 1 | 0.056454 | 1 | 1 | 0.043033 | 0 | 0 | 0 |
| 6 | 27325604..27339304 | ZNF204P | -13.2679 | 0.00115 | 8 | 8 | 0.139084 | 8 | 8 | 0.140274 | 5 | 5 | 0.074839 | 1 | 1 | 0.02259 | 0 | 0 | 0 | 0 | 0 | 0 |
| 7 | 44183872..44237769 | GCK | -13.2666 | 4E-09 | 9 | 9 | 0.15214 | 23 | 23 | 0.39213 | 21 | 21 | 0.305625 | 0 | 0 | 0 | 2 | 2 | 0.033486 | 1 | 1 | 0.014894 |
| 7 | 150497491..150502208 | TMEM176A | -13.2474 | 1.4E-17 | 23 | 26 | 0.520494 | 47 | 51 | 1.029711 | 47 | 49 | 0.844518 | 2 | 2 | 0.052024 | 2 | 2 | 0.039656 | 3 | 3 | 0.052914 |
| 13 | 31480328..31499709 | MEDAG | -13.2192 | 2.14E-50 | 75 | 258 | 7.568958 | 93 | 317 | 9.379464 | 108 | 385 | 9.724057 | 4 | 15 | 0.571794 | 6 | 15 | 0.43586 | 7 | 21 | 0.542799 |
| 1 | 226819391..226927024 | ITPKB | -13.0975 | 6E-179 | 1077 | 1077 | 10.66073 | 1128 | 1128 | 11.26115 | 1144 | 1144 | 9.74917 | 46 | 46 | 0.591645 | 81 | 81 | 0.794137 | 87 | 87 | 0.758741 |
| 7 | 119913722..120390385 | KCND2 | -13.0923 | 9.82E-48 | 86 | 99 | 1.241219 | 97 | 127 | 1.605902 | 106 | 135 | 1.457193 | 7 | 7 | 0.114036 | 4 | 6 | 0.074508 | 7 | 8 | 0.08837 |
| 18 | 32946661..32957301 | ZNF396 | -13.0756 | 1.42E-13 | 18 | 18 | 0.263534 | 27 | 27 | 0.398685 | 39 | 39 | 0.491585 | 2 | 2 | 0.038047 | 0 | 0 | 0 | 3 | 3 | 0.038698 |
| 2 | 138721590..138773930 | HNMT | -13.0241 | 3.8E-116 | 274 | 274 | 4.015792 | 343 | 343 | 5.070107 | 442 | 442 | 5.577163 | 13 | 13 | 0.247569 | 25 | 25 | 0.362911 | 29 | 29 | 0.374474 |
| 12 | 6058040..6233936 | VWF | -13.0185 | 1.54E-24 | 48 | 48 | 0.336828 | 42 | 42 | 0.297248 | 56 | 60 | 0.362483 | 0 | 0 | 0 | 5 | 5 | 0.034752 | 4 | 4 | 0.02473 |
| 16 | 88493879..88507165 | ZNF469 | -13.0185 | 6.1E-147 | 1300 | 1300 | 6.814179 | 1140 | 1140 | 6.026669 | 1136 | 1136 | 5.126475 | 58 | 58 | 0.39503 | 72 | 72 | 0.373802 | 101 | 101 | 0.466439 |
| 1 | 57460451..59012406 | DAB1 | -13.0179 | 2.52E-24 | 41 | 49 | 0.434956 | 53 | 76 | 0.680401 | 52 | 70 | 0.534955 | 3 | 5 | 0.05767 | 1 | 2 | 0.017584 | 5 | 5 | 0.039104 |
| 19 | 49316274..49339935 | HSD17B14 | -12.9918 | 1.3E-124 | 345 | 345 | 18.75716 | 283 | 283 | 15.51804 | 344 | 344 | 16.10189 | 15 | 15 | 1.059672 | 24 | 24 | 1.292404 | 23 | 23 | 1.10174 |
| 17 | 79910388..79919716 | NOTUM | -12.9162 | 3.6E-06 | 10 | 10 | 0.231075 | 14 | 14 | 0.326275 | 12 | 12 | 0.238729 | 1 | 1 | 0.030025 | 0 | 0 | 0 | 1 | 1 | 0.020359 |
| 10 | 88718375..88723017 | SNCG | -12.896 | 1.15E-44 | 91 | 112 | 6.255308 | 89 | 114 | 6.42152 | 88 | 113 | 5.433497 | 2 | 2 | 0.145142 | 9 | 10 | 0.553184 | 6 | 6 | 0.295247 |
| 5 | 176784838..176799602 | RGS14 | -12.8435 | 1.23E-43 | 80 | 80 | 1.467393 | 80 | 80 | 1.479956 | 76 | 76 | 1.200164 | 2 | 2 | 0.047667 | 6 | 6 | 0.109005 | 7 | 7 | 0.113125 |
| 3 | 177159709..177470093 | LINC00578 | -12.7599 | 5.91E-95 | 244 | 244 | 13.7712 | 201 | 201 | 11.44143 | 234 | 234 | 11.3702 | 14 | 14 | 1.026696 | 10 | 10 | 0.559012 | 20 | 20 | 0.994524 |
| 19 | 38741877..38747231 | PPP1R14A | -12.6759 | 2.8E-127 | 364 | 588 | 27.2831 | 321 | 530 | 24.80245 | 354 | 540 | 21.57151 | 17 | 25 | 1.507261 | 30 | 45 | 2.068083 | 21 | 30 | 1.226424 |
| 2 | 130959885..130970201 | AC018804.6 | -12.6451 | 0.000395 | 7 | 12 | 1.352352 | 6 | 10 | 1.136609 | 7 | 11 | 1.067264 | 0 | 0 | 0 | 0 | 0 | 0 | 1 | 1 | 0.099291 |
| 12 | 57628686..57634498 | NDUFA4L2 | -12.6335 | 1.72E-46 | 78 | 78 | 1.935994 | 82 | 82 | 2.052701 | 88 | 88 | 1.880453 | 4 | 4 | 0.129004 | 4 | 4 | 0.098335 | 8 | 8 | 0.174945 |

| 22 | 41956767..41973745 | CSDC2 | -12.5876 | 1.4E-228 | 3068 | 3074 | 65.87455 | 2737 | 2744 | 59.30621 | 2943 | 2946 | 54.35216 | 156 | 157 | 4.371651 | 193 | 195 | 4.138923 | 232 | 232 | 4.38031 |
| --- | --- | --- | --- | --- | --- | --- | --- | --- | --- | --- | --- | --- | --- | --- | --- | --- | --- | --- | --- | --- | --- | --- |
| 6 | 126661320..126670021 | CENPW | -12.5679 | 4.32E-23 | 51 | 51 | 4.467866 | 38 | 38 | 3.357499 | 52 | 52 | 3.921965 | 2 | 2 | 0.227663 | 5 | 5 | 0.433849 | 2 | 2 | 0.15437 |
| 5 | 137620954..137674044 | CDC25C | -12.5479 | 1.63E-07 | 24 | 24 | 0.549477 | 5 | 5 | 0.115454 | 21 | 21 | 0.413931 | 0 | 0 | 0 | 1 | 1 | 0.022677 | 2 | 2 | 0.040343 |
| 1 | 155158300..155162707 | MUC1 | -12.5162 | 1.5E-123 | 249 | 262 | 7.599872 | 246 | 267 | 7.811214 | 277 | 301 | 7.516952 | 12 | 14 | 0.527673 | 16 | 16 | 0.459689 | 23 | 24 | 0.613365 |
| 18 | 56148479..56296189 | ALPK2 | -12.5096 | 2.99E-81 | 190 | 345 | 2.806672 | 148 | 285 | 2.338405 | 194 | 337 | 2.360331 | 11 | 19 | 0.200844 | 11 | 19 | 0.153096 | 13 | 20 | 0.143353 |
| 16 | 29674600..29710020 | QPRT | -12.4825 | 1.4E-244 | 1613 | 1618 | 46.75829 | 1433 | 1438 | 41.91228 | 1626 | 1631 | 40.57928 | 80 | 80 | 3.004015 | 116 | 117 | 3.348921 | 116 | 116 | 2.953529 |
| 1 | 150702672..150738433 | CTSS | -12.3623 | 3.33E-17 | 29 | 29 | 0.477705 | 41 | 41 | 0.681159 | 39 | 39 | 0.553092 | 3 | 3 | 0.064212 | 4 | 4 | 0.065262 | 0 | 0 | 0 |
| 1 | 156495197..156542396 | IQGAP3 | -12.3426 | 1.1E-105 | 268 | 268 | 2.768491 | 236 | 236 | 2.458797 | 256 | 256 | 2.276767 | 14 | 14 | 0.187918 | 19 | 19 | 0.194402 | 18 | 18 | 0.163826 |
| 11 | 64812290..64826021 | NAALADL1 | -12.2965 | 1.02E-65 | 131 | 131 | 2.256094 | 107 | 107 | 1.858541 | 168 | 168 | 2.490953 | 8 | 8 | 0.179023 | 8 | 8 | 0.136463 | 11 | 11 | 0.16691 |
| 6 | 33689444..33714762 | IP6K3 | -12.2931 | 2.77E-19 | 34 | 34 | 0.83911 | 48 | 48 | 1.194768 | 41 | 41 | 0.871153 | 3 | 3 | 0.096204 | 2 | 2 | 0.048889 | 3 | 3 | 0.065233 |
| 11 | 66624118..66627946 | LRFN4 | -12.2763 | 2.81E-33 | 69 | 594 | 14.62865 | 75 | 599 | 14.87808 | 67 | 584 | 12.38229 | 3 | 48 | 1.535999 | 6 | 52 | 1.268411 | 5 | 75 | 1.627354 |
| 22 | 19466982..19508135 | CDC45 | -12.2403 | 2.24E-17 | 39 | 39 | 0.954392 | 26 | 26 | 0.641709 | 43 | 43 | 0.905943 | 3 | 3 | 0.095393 | 2 | 2 | 0.048476 | 2 | 2 | 0.043122 |
| 21 | 44778027..44782229 | AP001046.5 | -12.2073 | 2.05E-06 | 12 | 12 | 0.298697 | 10 | 10 | 0.251045 | 12 | 12 | 0.257159 | 0 | 0 | 0 | 2 | 2 | 0.049308 | 0 | 0 | 0 |
| 19 | 3585551..3593539 | GIPC3 | -12.207 | 7.12E-13 | 26 | 26 | 0.417716 | 29 | 29 | 0.469903 | 23 | 23 | 0.318131 | 2 | 2 | 0.041751 | 1 | 1 | 0.015913 | 2 | 2 | 0.02831 |
| 4 | 9772777..10056560 | SLC2A9 | -12.1865 | 2.1E-13 | 24 | 24 | 0.252723 | 21 | 21 | 0.223026 | 33 | 33 | 0.299169 | 0 | 0 | 0 | 0 | 0 | 0 | 5 | 5 | 0.046388 |
| 4 | 52917497..52963458 | SPATA18 | -12.1374 | 2.1E-164 | 347 | 347 | 4.891159 | 347 | 347 | 4.933034 | 408 | 408 | 4.951226 | 23 | 23 | 0.421252 | 27 | 27 | 0.376951 | 25 | 25 | 0.310474 |
| 18 | 43405477..43424045 | SIGLEC15 | -12.1185 | 4.45E-14 | 36 | 36 | 0.696849 | 31 | 31 | 0.605201 | 25 | 25 | 0.416626 | 4 | 4 | 0.100607 | 2 | 2 | 0.038345 | 0 | 0 | 0 |
| 20 | 4201329..4229721 | ADRA1D | -12.1163 | 1.69E-26 | 59 | 59 | 1.534973 | 67 | 67 | 1.758028 | 53 | 53 | 1.187121 | 5 | 5 | 0.169025 | 1 | 1 | 0.025768 | 6 | 6 | 0.137532 |
| 16 | 90071273..90086536 | DBNDD1 | -12.0975 | 7E-68 | 156 | 157 | 3.104613 | 144 | 145 | 2.891866 | 172 | 172 | 2.928239 | 16 | 16 | 0.411112 | 7 | 7 | 0.137102 | 9 | 9 | 0.156803 |
| 5 | 177540444..177553088 | N4BP3 | -12.087 | 1.73E-16 | 43 | 43 | 0.492563 | 35 | 35 | 0.404356 | 28 | 28 | 0.276135 | 3 | 3 | 0.044653 | 2 | 2 | 0.022691 | 2 | 2 | 0.020185 |
| 1 | 21046225..21059330 | SH2D5 | -12.0597 | 2E-103 | 205 | 205 | 3.228004 | 213 | 213 | 3.382689 | 224 | 224 | 3.036677 | 10 | 10 | 0.204603 | 16 | 16 | 0.249539 | 18 | 18 | 0.249721 |
| 12 | 49740700..49751309 | DNAJC22 | -12.0596 | 2.04E-37 | 131 | 132 | 2.64403 | 81 | 81 | 1.636363 | 159 | 159 | 2.741952 | 8 | 8 | 0.208216 | 9 | 9 | 0.178556 | 8 | 8 | 0.141184 |
| 1 | 241587592..241596792 | RP11-527D7.1 | -12.0426 | 0.000737 | 9 | 9 | 0.938346 | 6 | 6 | 0.63092 | 4 | 4 | 0.359047 | 0 | 0 | 0 | 0 | 0 | 0 | 1 | 1 | 0.091859 |
| 5 | 114914339..114961876 | TICAM2 | -12.0324 | 3.38E-13 | 26 | 166 | 2.749408 | 20 | 146 | 2.438857 | 31 | 249 | 3.550592 | 0 | 0 | 0 | 2 | 62 | 1.017096 | 3 | 33 | 0.481558 |
| 9 | 93881344..93945044 | RP11-305L7.6 | -12.019 | 0.001309 | 7 | 8 | 0.566229 | 4 | 4 | 0.285538 | 8 | 8 | 0.487486 | 0 | 0 | 0 | 0 | 0 | 0 | 1 | 1 | 0.06236 |
| 2 | 207602487..207630271 | MDH1B | -12.0091 | 0.005918 | 6 | 6 | 0.134366 | 5 | 5 | 0.11293 | 8 | 8 | 0.15424 | 1 | 1 | 0.029098 | 0 | 0 | 0 | 0 | 0 | 0 |
| 14 | 51771134..51795104 | LINC00519 | -12.0086 | 0.005996 | 8 | 8 | 0.816964 | 3 | 3 | 0.308984 | 8 | 8 | 0.703353 | 1 | 1 | 0.132692 | 0 | 0 | 0 | 0 | 0 | 0 |
| 22 | 21319396..21335649 | AIFM3 | -12.0042 | 0.001319 | 5 | 5 | 0.06531 | 4 | 6 | 0.079042 | 10 | 14 | 0.157436 | 0 | 0 | 0 | 1 | 2 | 0.025875 | 0 | 0 | 0 |
| 11 | 132284871..133402414 | OPCML | -11.9669 | 0.001459 | 5 | 5 | 0.045953 | 1 | 1 | 0.009269 | 13 | 13 | 0.102862 | 0 | 0 | 0 | 1 | 1 | 0.009103 | 0 | 0 | 0 |
| 12 | 52473480..52502045 | OR7E47P | -11.9482 | 7.71E-48 | 85 | 125 | 5.827155 | 90 | 139 | 6.535272 | 88 | 127 | 5.09707 | 4 | 4 | 0.242292 | 8 | 11 | 0.5079 | 6 | 14 | 0.575013 |
| 1 | 55505221..55530525 | PCSK9 | -11.9434 | 2.87E-29 | 62 | 62 | 0.836347 | 51 | 51 | 0.693853 | 64 | 64 | 0.743268 | 2 | 2 | 0.035056 | 6 | 6 | 0.080165 | 4 | 4 | 0.04754 |
| 1 | 163038565..163046592 | RGS4 | -11.9313 | 1.3E-181 | 852 | 852 | 12.27017 | 871 | 871 | 12.65119 | 1265 | 1265 | 15.68454 | 53 | 53 | 0.991788 | 77 | 77 | 1.098349 | 76 | 76 | 0.964334 |
| 3 | 190023490..190040264 | CLDN1 | -11.9217 | 8.14E-31 | 53 | 53 | 1.007711 | 83 | 83 | 1.591625 | 99 | 99 | 1.620562 | 3 | 3 | 0.074116 | 6 | 6 | 0.112993 | 7 | 7 | 0.117263 |
| 2 | 239008798..239041928 | ESPNL | -11.9064 | 1.37E-23 | 49 | 49 | 0.636453 | 45 | 45 | 0.589502 | 54 | 54 | 0.603857 | 5 | 5 | 0.084386 | 1 | 1 | 0.012865 | 4 | 4 | 0.045776 |
| X | 69509879..69640682 | KIF4A | -11.8954 | 1.58E-76 | 132 | 138 | 2.034971 | 163 | 171 | 2.543183 | 168 | 170 | 2.158234 | 10 | 10 | 0.191607 | 10 | 10 | 0.146056 | 12 | 12 | 0.155906 |
| 22 | 21364097..21383119 | P2RX6 | -11.8778 | 1.08E-28 | 60 | 60 | 0.883461 | 55 | 55 | 0.816772 | 61 | 61 | 0.773279 | 3 | 3 | 0.057397 | 5 | 5 | 0.07292 | 4 | 4 | 0.051892 |
| 7 | 44066550..44081491 | RASA4CP | -11.8654 | 2.17E-06 | 10 | 14 | 0.240337 | 14 | 21 | 0.363592 | 9 | 12 | 0.177355 | 0 | 1 | 0.022306 | 2 | 2 | 0.034006 | 0 | 0 | 0 |
| 5 | 40909354..40983041 | C7 | -11.834 | 6.03E-22 | 35 | 35 | 0.466708 | 42 | 42 | 0.564844 | 71 | 71 | 0.81509 | 1 | 1 | 0.017326 | 7 | 7 | 0.092452 | 2 | 2 | 0.023497 |
| 2 | 167260083..167350757 | SCN7A | -11.8232 | 1.8E-166 | 650 | 650 | 5.526798 | 775 | 775 | 6.64606 | 1020 | 1020 | 7.466734 | 54 | 54 | 0.596604 | 62 | 62 | 0.522145 | 53 | 53 | 0.397045 |
| 11 | 694438..727727 | EPS8L2 | -11.8134 | 2E-136 | 908 | 1082 | 13.23681 | 806 | 981 | 12.10395 | 874 | 1018 | 10.72196 | 65 | 76 | 1.208096 | 67 | 72 | 0.872424 | 48 | 63 | 0.679047 |
| 11 | 62453874..62457371 | LRRN4CL | -11.8081 | 3E-211 | 1869 | 1874 | 50.49009 | 1698 | 1705 | 46.33011 | 1867 | 1873 | 43.44549 | 94 | 94 | 3.290762 | 137 | 138 | 3.682601 | 154 | 155 | 3.679353 |
| 13 | 43460524..43566407 | EPSTI1 | -11.7976 | 5.69E-50 | 87 | 87 | 1.230547 | 91 | 91 | 1.298144 | 96 | 96 | 1.169017 | 4 | 4 | 0.073514 | 6 | 6 | 0.084056 | 9 | 9 | 0.112157 |
| 22 | 17660194..17702879 | CECR1 | -11.773 | 1.22E-30 | 67 | 67 | 0.908546 | 85 | 85 | 1.162501 | 141 | 141 | 1.64612 | 7 | 7 | 0.12334 | 8 | 8 | 0.107449 | 5 | 5 | 0.059737 |
| 17 | 73584139..73622929 | MYO15B | -11.752 | 1.14E-32 | 75 | 75 | 0.406116 | 53 | 53 | 0.289446 | 74 | 74 | 0.344977 | 1 | 1 | 0.007036 | 4 | 4 | 0.021453 | 9 | 9 | 0.042937 |
| 7 | 143969538..143991256 | ARHGEF34P | -11.6174 | 6.68E-21 | 47 | 326 | 4.436234 | 43 | 335 | 4.597735 | 40 | 355 | 4.159063 | 2 | 18 | 0.318274 | 5 | 36 | 0.48522 | 2 | 20 | 0.239789 |
| 17 | 6658766..6678966 | XAF1 | -11.6053 | 1.3E-113 | 329 | 329 | 3.43635 | 282 | 282 | 2.97066 | 312 | 312 | 2.805605 | 17 | 17 | 0.230719 | 27 | 27 | 0.279321 | 22 | 22 | 0.202454 |
| 2 | 85788685..85809154 | VAMP8 | -11.5791 | 6.63E-32 | 53 | 53 | 3.728531 | 63 | 63 | 4.469972 | 84 | 84 | 5.087584 | 3 | 3 | 0.27423 | 4 | 4 | 0.278715 | 7 | 7 | 0.433873 |
| 2 | 158114110..158170723 | GALNT5 | -11.5753 | 0 | 2594 | 2594 | 26.49782 | 2538 | 2538 | 26.14773 | 3272 | 3272 | 28.77556 | 156 | 156 | 2.070603 | 200 | 200 | 2.023528 | 246 | 246 | 2.214004 |
| 21 | 44949072..45079374 | HSF2BP | -11.5481 | 7.04E-08 | 18 | 18 | 0.657039 | 15 | 15 | 0.55222 | 13 | 13 | 0.408538 | 1 | 1 | 0.04743 | 1 | 1 | 0.036154 | 1 | 1 | 0.03216 |

| 9 | 103204553..103339918 | MSANTD3-TMEF | -11.5149 | 1.15E-07 | 15 | 35 | 1.178161 | 12 | 26 | 0.882698 | 19 | 44 | 1.275145 | 2 | 3 | 0.131217 | 1 | 1 | 0.033341 | 0 | 2 | 0.059316 |
| --- | --- | --- | --- | --- | --- | --- | --- | --- | --- | --- | --- | --- | --- | --- | --- | --- | --- | --- | --- | --- | --- | --- |
| 21 | 39751949..40033704 | ERG | -11.5005 | 3.72E-06 | 12 | 12 | 0.104469 | 8 | 8 | 0.070242 | 12 | 12 | 0.089941 | 0 | 0 | 0 | 0 | 0 | 0 | 2 | 2 | 0.015341 |
| 1 | 216676588..217311097 | ESRRG | -11.495 | 1.94E-05 | 8 | 9 | 0.057612 | 13 | 13 | 0.083929 | 11 | 11 | 0.060622 | 1 | 1 | 0.008318 | 0 | 0 | 0 | 1 | 1 | 0.00564 |
| 5 | 150040436..150058927 | MYOZ3 | -11.4808 | 6.78E-06 | 10 | 11 | 0.141636 | 7 | 8 | 0.10389 | 15 | 18 | 0.199537 | 0 | 0 | 0 | 2 | 2 | 0.025506 | 0 | 0 | 0 |
| 10 | 100007447..100028007 | LOXL4 | -11.4742 | 4.03E-45 | 970 | 981 | 18.70322 | 917 | 930 | 17.88269 | 1084 | 1098 | 18.02271 | 56 | 56 | 1.387291 | 77 | 78 | 1.472926 | 82 | 82 | 1.377414 |
| 21 | 44473301..44497053 | CBS | -11.4557 | 1.3E-113 | 351 | 351 | 3.577609 | 378 | 378 | 3.885795 | 341 | 341 | 2.992336 | 18 | 18 | 0.238391 | 27 | 27 | 0.272577 | 33 | 33 | 0.296349 |
| 16 | 81134480..81253975 | PKD1L2 | -11.4441 | 4.17E-71 | 145 | 145 | 0.541863 | 141 | 141 | 0.531426 | 145 | 145 | 0.466508 | 11 | 11 | 0.053413 | 10 | 10 | 0.037013 | 10 | 10 | 0.032925 |
| 1 | 173578700..173639001 | ANKRD45 | -11.404 | 0.001336 | 3 | 5 | 0.119626 | 9 | 9 | 0.21717 | 6 | 9 | 0.185382 | 0 | 0 | 0 | 1 | 1 | 0.023697 | 0 | 0 | 0 |
| 3 | 53528683..53847760 | CACNA1D | -11.4032 | 0.005947 | 7 | 7 | 0.043459 | 6 | 6 | 0.037569 | 5 | 5 | 0.026725 | 1 | 1 | 0.008067 | 0 | 0 | 0 | 0 | 0 | 0 |
| 9 | 27109139..27230173 | TEK | -11.4013 | 3.1E-53 | 92 | 92 | 1.343844 | 87 | 87 | 1.281688 | 114 | 114 | 1.433627 | 6 | 6 | 0.113879 | 7 | 7 | 0.101274 | 8 | 8 | 0.102957 |
| 19 | 36393382..36395279 | HCST | -11.3978 | 0.00131 | 6 | 6 | 0.681692 | 4 | 4 | 0.458352 | 8 | 8 | 0.782523 | 0 | 0 | 0 | 0 | 0 | 0 | 1 | 1 | 0.100101 |
| X | 70521584..70525221 | ITGB1BP2 | -11.3924 | 0.005947 | 4 | 4 | 0.126572 | 7 | 7 | 0.223397 | 7 | 7 | 0.190698 | 1 | 1 | 0.041116 | 0 | 0 | 0 | 0 | 0 | 0 |
| 22 | 39063590..39077825 | RP3-508I15.9 | -11.3881 | 0.005932 | 5 | 9 | 0.186663 | 5 | 21 | 0.439277 | 8 | 19 | 0.339266 | 1 | 7 | 0.188646 | 0 | 3 | 0.061628 | 0 | 12 | 0.219281 |
| 5 | 44303646..44389808 | FGF10 | -11.3486 | 1.25E-82 | 163 | 222 | 5.134987 | 145 | 195 | 4.549077 | 217 | 287 | 5.715294 | 8 | 11 | 0.330606 | 14 | 17 | 0.38947 | 16 | 19 | 0.387207 |
| 11 | 61282785..61348620 | SYT7 | -11.3442 | 5.74E-81 | 210 | 210 | 2.456861 | 202 | 202 | 2.383499 | 190 | 190 | 1.91375 | 12 | 12 | 0.182421 | 18 | 18 | 0.20858 | 14 | 14 | 0.144309 |
| 11 | 124735282..124751366 | ROBO3 | -11.3181 | 7.38E-51 | 245 | 245 | 2.428595 | 191 | 191 | 1.909522 | 195 | 195 | 1.664156 | 7 | 7 | 0.090161 | 12 | 12 | 0.117817 | 28 | 28 | 0.24454 |
| 8 | 59717977..60031767 | TOX | -11.3173 | 8.37E-45 | 95 | 95 | 1.601642 | 87 | 87 | 1.479325 | 109 | 111 | 1.611147 | 10 | 10 | 0.219066 | 3 | 3 | 0.050096 | 8 | 8 | 0.118832 |
| 1 | 78354198..78409580 | NEXN | -11.2875 | 0 | 3774 | 3840 | 57.83764 | 3440 | 3490 | 53.01601 | 3742 | 3785 | 49.08124 | 226 | 231 | 4.520884 | 283 | 287 | 4.281542 | 299 | 305 | 4.047457 |
| 17 | 58160927..58169246 | CTD-2319I12.1 | -11.2822 | 2.48E-13 | 18 | 19 | 1.204074 | 33 | 35 | 2.23702 | 35 | 45 | 2.455174 | 3 | 3 | 0.247032 | 2 | 4 | 0.251072 | 1 | 2 | 0.111669 |
| 1 | 38158090..38175391 | CDCA8 | -11.278 | 2.51E-44 | 82 | 82 | 2.313076 | 95 | 95 | 2.702726 | 99 | 99 | 2.404261 | 7 | 7 | 0.25657 | 7 | 7 | 0.195575 | 6 | 6 | 0.149118 |
| 20 | 42740335..42816218 | JPH2 | -11.2642 | 5.13E-37 | 112 | 112 | 1.312531 | 112 | 112 | 1.323768 | 90 | 90 | 0.908038 | 7 | 7 | 0.106591 | 10 | 10 | 0.116073 | 6 | 6 | 0.061951 |
| 1 | 16340523..16346089 | HSPB7 | -11.2087 | 5.6E-141 | 650 | 650 | 11.578 | 647 | 647 | 11.62323 | 687 | 689 | 10.56598 | 41 | 41 | 0.948935 | 56 | 56 | 0.987978 | 50 | 50 | 0.784682 |
| 17 | 54671060..54672951 | NOG | -11.2012 | 1.01E-09 | 19 | 19 | 0.699406 | 24 | 24 | 0.891024 | 15 | 15 | 0.475376 | 1 | 1 | 0.047831 | 1 | 1 | 0.03646 | 2 | 2 | 0.064865 |
| 22 | 36536372..36562225 | APOL3 | -11.1968 | 5.7E-143 | 302 | 302 | 3.511375 | 285 | 285 | 3.342085 | 361 | 361 | 3.613665 | 16 | 16 | 0.241725 | 24 | 24 | 0.276389 | 30 | 30 | 0.307323 |
| X | 106765680..106848481 | FRMPD3 | -11.1659 | 8.87E-06 | 6 | 6 | 0.04563 | 17 | 17 | 0.130391 | 8 | 8 | 0.052379 | 0 | 0 | 0 | 2 | 2 | 0.015065 | 0 | 0 | 0 |
| 22 | 21311380..21318967 | XXbac-B135H6.15 | -11.1657 | 1.22E-09 | 18 | 18 | 1.832793 | 17 | 17 | 1.745791 | 23 | 23 | 2.016226 | 1 | 1 | 0.132304 | 1 | 1 | 0.100851 | 2 | 2 | 0.179421 |
| 21 | 39529128..39679279 | KCNJ15 | -11.1285 | 3.3E-05 | 9 | 9 | 0.06472 | 9 | 9 | 0.065274 | 13 | 13 | 0.080484 | 1 | 1 | 0.009344 | 1 | 1 | 0.007123 | 0 | 0 | 0 |
| 18 | 47901365..47920543 | SKA1 | -11.1096 | 3.32E-15 | 22 | 23 | 0.543004 | 34 | 34 | 0.809574 | 42 | 43 | 0.874005 | 2 | 2 | 0.061353 | 0 | 0 | 0 | 5 | 5 | 0.104004 |
| 11 | 27015628..27018630 | FIBIN | -11.0783 | 6.7E-193 | 463 | 463 | 10.73798 | 477 | 477 | 11.15739 | 540 | 540 | 10.78216 | 21 | 21 | 0.632839 | 43 | 43 | 0.987755 | 47 | 47 | 0.960379 |
| 6 | 42068856..42110357 | C6orf132 | -11.0763 | 2.06E-83 | 319 | 319 | 3.242429 | 232 | 232 | 2.378319 | 290 | 290 | 2.537746 | 15 | 15 | 0.198108 | 29 | 29 | 0.291956 | 19 | 19 | 0.170152 |
| 1 | 29445940..29450447 | TMEM200B | -11.0425 | 5.6E-149 | 370 | 422 | 11.13705 | 348 | 395 | 10.51374 | 389 | 458 | 10.40623 | 26 | 29 | 0.994461 | 28 | 33 | 0.862602 | 29 | 30 | 0.697561 |
| 5 | 162887209..162918947 | HMMR | -11.036 | 4.82E-19 | 40 | 45 | 0.797069 | 35 | 42 | 0.7503 | 49 | 54 | 0.82347 | 4 | 4 | 0.092061 | 4 | 4 | 0.070175 | 1 | 1 | 0.015606 |
| 1 | 20008706..20126438 | TMCO4 | -11.0184 | 3.7E-110 | 348 | 348 | 5.978505 | 327 | 327 | 5.665829 | 338 | 338 | 4.999199 | 13 | 13 | 0.290194 | 22 | 22 | 0.374348 | 42 | 42 | 0.63572 |
| 16 | 66955582..66959547 | RRAD | -11.0115 | 1.2E-141 | 574 | 574 | 23.39198 | 469 | 469 | 19.27659 | 552 | 552 | 19.36709 | 39 | 39 | 2.065151 | 38 | 38 | 1.533832 | 43 | 43 | 1.543927 |
| 6 | 80713604..80752244 | TTK | -10.9829 | 3.84E-22 | 40 | 40 | 0.608396 | 50 | 50 | 0.767006 | 60 | 60 | 0.785684 | 6 | 6 | 0.11858 | 0 | 0 | 0 | 5 | 5 | 0.067004 |
| 4 | 102332443..102995969 | BANK1 | -10.9199 | 1.22E-13 | 21 | 28 | 0.317398 | 29 | 38 | 0.434442 | 33 | 39 | 0.380611 | 0 | 0 | 0 | 3 | 5 | 0.056138 | 3 | 3 | 0.029962 |
| 2 | 10262455..10271545 | RRM2 | -10.9165 | 1.2E-107 | 205 | 207 | 2.910124 | 209 | 211 | 2.991754 | 276 | 279 | 3.37688 | 15 | 15 | 0.274009 | 20 | 20 | 0.27849 | 17 | 17 | 0.210568 |
| 19 | 1000418..1009731 | GRIN3B | -10.9038 | 3.15E-23 | 42 | 46 | 0.976447 | 42 | 44 | 0.941989 | 65 | 67 | 1.224436 | 4 | 4 | 0.110327 | 2 | 2 | 0.042049 | 5 | 5 | 0.093511 |
| 4 | 675618..683230 | MFSD7 | -10.8746 | 1.11E-30 | 72 | 72 | 1.896567 | 60 | 61 | 1.62057 | 68 | 68 | 1.542108 | 3 | 4 | 0.136908 | 3 | 4 | 0.10436 | 9 | 9 | 0.208873 |
| 18 | 77155856..77289325 | NFATC1 | -10.8648 | 8.5E-105 | 204 | 204 | 2.027371 | 241 | 241 | 2.415585 | 253 | 253 | 2.164681 | 16 | 16 | 0.206612 | 21 | 21 | 0.20671 | 16 | 16 | 0.140096 |
| 19 | 34286838..34306668 | KCTD15 | -10.8634 | 1.3E-18 | 52 | 52 | 0.566938 | 47 | 47 | 0.516812 | 35 | 35 | 0.328527 | 3 | 3 | 0.0425 | 4 | 4 | 0.043195 | 3 | 3 | 0.028818 |
| 11 | 61382508..61406921 | RPLP0P2 | -10.8471 | 7.67E-33 | 73 | 73 | 1.300632 | 92 | 94 | 1.689124 | 73 | 73 | 1.119759 | 4 | 4 | 0.092603 | 8 | 10 | 0.17647 | 6 | 6 | 0.094186 |
| 11 | 93551398..93583697 | VSTM5 | -10.7912 | 1.24E-05 | 6 | 6 | 0.108568 | 13 | 13 | 0.237244 | 11 | 11 | 0.171361 | 0 | 0 | 0 | 0 | 0 | 0 | 2 | 2 | 0.031885 |
| 1 | 87458692..87634884 | RP5-1052I5.2 | -10.7852 | 0.002434 | 9 | 22 | 0.762296 | 2 | 4 | 0.139786 | 6 | 14 | 0.417637 | 0 | 0 | 0 | 1 | 2 | 0.068639 | 0 | 7 | 0.213699 |
| 12 | 6802958..6809966 | PIANP | -10.7844 | 2.5E-22 | 39 | 39 | 0.83166 | 54 | 54 | 1.161387 | 54 | 54 | 0.991391 | 4 | 4 | 0.110834 | 3 | 3 | 0.063364 | 4 | 4 | 0.075153 |
| 9 | 72808913..72873782 | SMC5-AS1 | -10.7789 | 0.002375 | 7 | 8 | 0.306474 | 3 | 3 | 0.115912 | 7 | 7 | 0.230872 | 0 | 0 | 0 | 1 | 1 | 0.037944 | 0 | 0 | 0 |
| 14 | 76424442..76449334 | TGFB3 | -10.7737 | 1.79E-24 | 52 | 145 | 2.055086 | 46 | 156 | 2.229918 | 62 | 171 | 2.086548 | 5 | 16 | 0.294655 | 4 | 17 | 0.238644 | 3 | 17 | 0.212282 |
| 18 | 74690783..74845639 | MBP | -10.7673 | 3.04E-66 | 122 | 126 | 0.471416 | 120 | 124 | 0.467905 | 138 | 138 | 0.444512 | 9 | 10 | 0.048615 | 7 | 8 | 0.029646 | 13 | 15 | 0.049446 |
| 16 | 31212806..31214771 | PYCARD | -10.7445 | 2.7E-112 | 280 | 412 | 17.27526 | 283 | 394 | 16.66196 | 278 | 417 | 15.05338 | 17 | 28 | 1.525519 | 23 | 35 | 1.453565 | 25 | 36 | 1.329943 |

| 1 | 100549119..100598511 | SASS6 | -10.7195 | 5.3E-10 | 10 | 12 | 0.210411 | 24 | 26 | 0.459794 | 35 | 36 | 0.543451 | 0 | 0 | 0 | 3 | 3 | 0.052101 | 2 | 2 | 0.030897 |
| --- | --- | --- | --- | --- | --- | --- | --- | --- | --- | --- | --- | --- | --- | --- | --- | --- | --- | --- | --- | --- | --- | --- |
| 17 | 4851387..4860426 | ENO3 | -10.6767 | 6.23E-15 | 29 | 32 | 0.519263 | 30 | 40 | 0.654636 | 35 | 38 | 0.530874 | 2 | 3 | 0.063254 | 1 | 2 | 0.032144 | 4 | 4 | 0.057187 |
| 19 | 14260750..14316999 | LPHN1 | -10.641 | 7.21E-30 | 70 | 139 | 1.538591 | 55 | 114 | 1.272669 | 71 | 132 | 1.257919 | 4 | 33 | 0.474629 | 2 | 34 | 0.372757 | 9 | 47 | 0.458363 |
| 12 | 22216707..22589975 | ST8SIA1 | -10.5932 | 3.78E-09 | 19 | 19 | 0.091368 | 15 | 15 | 0.07275 | 21 | 21 | 0.086942 | 1 | 1 | 0.006248 | 2 | 2 | 0.009526 | 1 | 1 | 0.004237 |
| 13 | 38136720..38172981 | POSTN | -10.5749 | 0 | 4147 | 4147 | 52.85919 | 4536 | 4536 | 58.31252 | 6157 | 6157 | 67.56564 | 312 | 312 | 5.167412 | 406 | 406 | 5.12568 | 437 | 437 | 4.907621 |
| 7 | 76026835..76071388 | ZP3 | -10.5665 | 7.07E-07 | 18 | 28 | 0.718002 | 14 | 20 | 0.517249 | 10 | 14 | 0.309076 | 1 | 2 | 0.066639 | 0 | 0 | 0 | 2 | 2 | 0.045186 |
| 11 | 9779839..9832866 | SBF2-AS1 | -10.5375 | 5.98E-07 | 14 | 80 | 1.400979 | 12 | 103 | 1.819203 | 16 | 93 | 1.402151 | 0 | 8 | 0.182039 | 3 | 19 | 0.32956 | 0 | 17 | 0.262297 |
| 4 | 177134824..177198722 | ASB5 | -10.5298 | 1.41E-12 | 24 | 24 | 0.411296 | 27 | 27 | 0.46667 | 29 | 29 | 0.42787 | 1 | 1 | 0.022268 | 3 | 3 | 0.050922 | 2 | 2 | 0.030198 |
| 11 | 83166055..85338966 | DLG2 | -10.525 | 1.7E-12 | 21 | 21 | 0.090905 | 30 | 30 | 0.130976 | 29 | 30 | 0.111805 | 2 | 2 | 0.011249 | 2 | 2 | 0.008575 | 2 | 2 | 0.007628 |
| 12 | 15094951..15114662 | ARHGDIB | -10.4976 | 5.82E-27 | 70 | 70 | 2.31933 | 49 | 49 | 1.63743 | 75 | 75 | 2.13942 | 5 | 5 | 0.215262 | 8 | 8 | 0.262539 | 2 | 2 | 0.058384 |
| 6 | 25081548..25166793 | CMAHP | -10.483 | 3.51E-16 | 39 | 39 | 0.627588 | 25 | 25 | 0.405744 | 41 | 41 | 0.568021 | 2 | 2 | 0.041819 | 4 | 4 | 0.063754 | 2 | 2 | 0.028356 |
| 5 | 148786252..148808241 | MIR143HG | -10.445 | 2.5E-60 | 200 | 200 | 1.571084 | 198 | 198 | 1.568689 | 177 | 177 | 1.197052 | 10 | 10 | 0.102071 | 10 | 10 | 0.077805 | 26 | 26 | 0.179948 |
| 10 | 72238577..72328205 | PALD1 | -10.4313 | 1.02E-08 | 24 | 24 | 0.366961 | 16 | 16 | 0.246735 | 14 | 14 | 0.184292 | 2 | 2 | 0.039735 | 0 | 0 | 0 | 2 | 2 | 0.026943 |
| 6 | 32158543..32163300 | GPSM3 | -10.4204 | 1.56E-31 | 73 | 73 | 2.74227 | 61 | 61 | 2.311104 | 70 | 70 | 2.263892 | 1 | 1 | 0.048811 | 6 | 6 | 0.223243 | 9 | 9 | 0.297874 |
| 19 | 45417504..45422606 | APOC1 | -10.3937 | 3.26E-12 | 30 | 30 | 1.697307 | 21 | 21 | 1.198287 | 28 | 31 | 1.50998 | 2 | 2 | 0.147028 | 4 | 4 | 0.22415 | 0 | 0 | 0 |
| 18 | 33767482..33852120 | MOCOS | -10.3847 | 2.13E-74 | 139 | 139 | 1.541286 | 135 | 135 | 1.509748 | 194 | 194 | 1.851998 | 10 | 10 | 0.144079 | 9 | 9 | 0.098844 | 18 | 18 | 0.175851 |
| 10 | 80008505..80434724 | LINC00856 | -10.3815 | 1.73E-23 | 47 | 47 | 0.858927 | 49 | 49 | 0.903143 | 58 | 58 | 0.91255 | 4 | 4 | 0.094984 | 3 | 3 | 0.054302 | 5 | 5 | 0.080507 |
| 19 | 11685475..11689823 | ACP5 | -10.3452 | 1.39E-15 | 26 | 61 | 1.509742 | 26 | 72 | 1.797247 | 52 | 96 | 2.045571 | 0 | 2 | 0.064318 | 4 | 13 | 0.31868 | 4 | 8 | 0.174448 |
| 13 | 21727734..21750741 | SKA3 | -10.2666 | 1.63E-23 | 53 | 53 | 1.211039 | 40 | 40 | 0.921817 | 72 | 72 | 1.416397 | 3 | 3 | 0.089071 | 3 | 3 | 0.067896 | 7 | 7 | 0.140923 |
| 8 | 108261721..108510283 | ANGPT1 | -10.2588 | 1.1E-137 | 295 | 295 | 2.886836 | 337 | 337 | 3.326078 | 415 | 415 | 3.49638 | 27 | 27 | 0.343318 | 30 | 30 | 0.290777 | 27 | 27 | 0.232791 |
| 9 | 139889087..139891255 | CLIC3 | -10.2433 | 9.83E-23 | 52 | 52 | 3.076975 | 41 | 41 | 2.446847 | 59 | 59 | 3.005682 | 4 | 4 | 0.307548 | 3 | 3 | 0.175825 | 5 | 5 | 0.260672 |
| 11 | 58874658..58894883 | FAM111B | -10.1901 | 1.69E-23 | 53 | 53 | 0.957025 | 39 | 39 | 0.710255 | 59 | 59 | 0.917212 | 2 | 2 | 0.046926 | 2 | 2 | 0.03577 | 8 | 8 | 0.127274 |
| 7 | 100218039..100240402 | TFR2 | -10.1878 | 0.004336 | 7 | 7 | 0.096253 | 7 | 7 | 0.097077 | 2 | 2 | 0.023677 | 0 | 0 | 0 | 0 | 0 | 0 | 1 | 1 | 0.012115 |
| 3 | 52009066..52023213 | ACY1 | -10.1763 | 1.63E-83 | 171 | 258 | 4.768765 | 149 | 246 | 4.58589 | 211 | 330 | 5.251344 | 8 | 18 | 0.432306 | 15 | 28 | 0.512605 | 20 | 29 | 0.472267 |
| 14 | 32798479..33300567 | AKAP6 | -10.1726 | 5.74E-25 | 41 | 41 | 0.212652 | 67 | 67 | 0.35048 | 80 | 80 | 0.357229 | 1 | 1 | 0.006739 | 9 | 9 | 0.046235 | 5 | 5 | 0.022849 |
| 19 | 17513748..17516457 | BST2 | -10.1657 | 0.004267 | 7 | 7 | 0.435677 | 3 | 3 | 0.188317 | 6 | 6 | 0.321506 | 0 | 0 | 0 | 0 | 0 | 0 | 1 | 1 | 0.054837 |
| 20 | 44451853..44462384 | TNNC2 | -10.1645 | 0.004265 | 3 | 3 | 0.238514 | 7 | 7 | 0.561298 | 6 | 6 | 0.41069 | 0 | 0 | 0 | 0 | 0 | 0 | 1 | 1 | 0.070048 |
| 6 | 32008931..32083111 | TNXB | -10.1619 | 2.3E-200 | 2491 | 2679 | 12.30265 | 2327 | 2523 | 11.68546 | 2324 | 2533 | 10.01455 | 145 | 159 | 0.948758 | 223 | 237 | 1.077987 | 222 | 246 | 0.995324 |
| 3 | 177401415..177409038 | RP11-114M1.1 | -10.1566 | 0.017431 | 7 | 14 | 1.661067 | 3 | 4 | 0.478654 | 6 | 11 | 1.123627 | 1 | 1 | 0.154167 | 0 | 0 | 0 | 0 | 0 | 0 |
| 14 | 70320848..70499083 | SMOC1 | -10.1563 | 0.017618 | 8 | 8 | 0.127528 | 2 | 2 | 0.032155 | 6 | 6 | 0.082345 | 1 | 1 | 0.020713 | 0 | 0 | 0 | 0 | 0 | 0 |
| 8 | 22842109..22876848 | RP11-875O11.1 | -10.1526 | 0.004294 | 6 | 32 | 0.982662 | 2 | 41 | 1.269814 | 8 | 67 | 1.771329 | 0 | 7 | 0.279309 | 1 | 12 | 0.364984 | 0 | 2 | 0.054111 |
| 14 | 69725994..69821183 | GALNT16 | -10.1237 | 6.1E-116 | 295 | 325 | 2.748634 | 265 | 292 | 2.490684 | 304 | 322 | 2.344551 | 12 | 13 | 0.142859 | 24 | 27 | 0.226171 | 35 | 35 | 0.260798 |
| 22 | 45064593..45133561 | PRR5 | -10.0871 | 1.17E-35 | 69 | 204 | 2.894828 | 71 | 192 | 2.74787 | 82 | 202 | 2.467825 | 2 | 7 | 0.129069 | 3 | 15 | 0.210825 | 13 | 25 | 0.312562 |
| 14 | 92980118..93155339 | RIN3 | -10.0803 | 1.4E-169 | 1355 | 1355 | 10.86843 | 1146 | 1146 | 9.270737 | 1275 | 1275 | 8.804564 | 84 | 84 | 0.875465 | 101 | 101 | 0.802394 | 128 | 128 | 0.904566 |
| 19 | 10400657..10407454 | ICAM5 | -10.0734 | 1.02E-90 | 225 | 225 | 5.037089 | 185 | 185 | 4.177064 | 223 | 223 | 4.298058 | 14 | 14 | 0.407246 | 16 | 16 | 0.354778 | 22 | 22 | 0.433933 |
| 11 | 1874200..1913497 | LSP1_1 | -10.0714 | 0.000172 | 10 | 10 | 0.128998 | 7 | 7 | 0.091072 | 11 | 11 | 0.122165 | 1 | 1 | 0.016762 | 0 | 0 | 0 | 1 | 1 | 0.011365 |
| 8 | 12039605..12051642 | FAM86B1 | -10.0695 | 3.77E-05 | 7 | 16 | 0.263312 | 9 | 33 | 0.547732 | 12 | 26 | 0.368379 | 0 | 3 | 0.064151 | 2 | 13 | 0.211901 | 0 | 6 | 0.086997 |
| 17 | 38785049..38821393 | KRT222_1 | -10.0684 | 3.81E-05 | 9 | 11 | 0.295338 | 6 | 7 | 0.189552 | 13 | 20 | 0.462304 | 0 | 0 | 0 | 1 | 1 | 0.026593 | 1 | 2 | 0.047311 |
| 5 | 32689176..32791819 | NPR3 | -10.0605 | 4.48E-97 | 179 | 251 | 1.773839 | 197 | 265 | 1.888812 | 233 | 327 | 1.989567 | 8 | 14 | 0.128558 | 19 | 23 | 0.160993 | 23 | 32 | 0.199248 |
| 6 | 125440195..125585553 | TPD52L1 | -9.9923 | 7.53E-26 | 85 | 117 | 1.411746 | 68 | 87 | 1.058747 | 67 | 102 | 1.059598 | 10 | 12 | 0.188141 | 1 | 3 | 0.035853 | 7 | 11 | 0.116941 |
| 20 | 4760669..4804291 | RASSF2 | -9.99204 | 3.5E-99 | 188 | 188 | 2.273568 | 217 | 217 | 2.646745 | 273 | 273 | 2.842386 | 10 | 10 | 0.157138 | 19 | 19 | 0.227584 | 27 | 27 | 0.287685 |
| 8 | 145462709..145485885 | CTD-3232M19.2 | -9.96705 | 0.001262 | 2 | 9 | 0.162093 | 42 | 105 | 1.907281 | 51 | 129 | 2.000244 | 4 | 9 | 0.210619 | 3 | 7 | 0.124871 | 0 | 0 | 0 |
| 19 | 17516531..17544533 | MVB12A | -9.93795 | 3.6E-153 | 395 | 471 | 8.107597 | 392 | 458 | 7.951317 | 421 | 484 | 7.172771 | 23 | 29 | 0.648636 | 41 | 51 | 0.869522 | 37 | 46 | 0.697641 |
| 2 | 130896860..130902707 | CCDC74B | -9.91888 | 1.94E-25 | 58 | 87 | 1.350393 | 51 | 84 | 1.314991 | 62 | 85 | 1.135874 | 4 | 10 | 0.201685 | 8 | 12 | 0.184485 | 2 | 4 | 0.054702 |
| X | 153200716..153210232 | RENBP | -9.91619 | 2.78E-23 | 110 | 110 | 3.569933 | 60 | 60 | 1.963907 | 83 | 83 | 2.319081 | 6 | 6 | 0.253018 | 7 | 7 | 0.225011 | 8 | 8 | 0.22875 |
| 1 | 171283347..171311223 | FMO4 | -9.87896 | 2.89E-13 | 24 | 24 | 0.664087 | 30 | 30 | 0.837216 | 33 | 33 | 0.786137 | 3 | 3 | 0.107862 | 0 | 0 | 0 | 4 | 4 | 0.097516 |
| 17 | 61509665..61523739 | CYB561 | -9.87635 | 1.2E-166 | 483 | 484 | 6.336229 | 480 | 481 | 6.350865 | 591 | 592 | 6.67233 | 41 | 41 | 0.697431 | 42 | 42 | 0.544595 | 47 | 47 | 0.542109 |
| 1 | 1353800..1357149 | ANKRD65 | -9.867 | 8.88E-14 | 42 | 43 | 1.132672 | 31 | 31 | 0.823568 | 25 | 26 | 0.58963 | 2 | 2 | 0.068454 | 2 | 2 | 0.05218 | 4 | 4 | 0.092832 |
| 18 | 77724561..77730822 | HSBP1L1 | -9.85313 | 9.48E-83 | 172 | 172 | 7.220698 | 158 | 158 | 6.689754 | 183 | 183 | 6.614121 | 9 | 9 | 0.490936 | 18 | 18 | 0.748449 | 16 | 16 | 0.591798 |

| 14 | 80663873..80854100 | DIO2 | -9.85196 | 2.71E-34 | 75 | 79 | 0.733606 | 67 | 70 | 0.655596 | 87 | 89 | 0.711535 | 4 | 4 | 0.048265 | 4 | 4 | 0.03679 | 11 | 11 | 0.089998 |
| --- | --- | --- | --- | --- | --- | --- | --- | --- | --- | --- | --- | --- | --- | --- | --- | --- | --- | --- | --- | --- | --- | --- |
| 15 | 74200424..74220589 | LOXL1-AS1 | -9.83268 | 1.05E-37 | 70 | 72 | 1.228749 | 89 | 89 | 1.531873 | 118 | 118 | 1.733736 | 6 | 6 | 0.13305 | 6 | 6 | 0.101419 | 11 | 12 | 0.180433 |
| 17 | 32582304..32584222 | CCL2 | -9.83097 | 1.6E-104 | 206 | 206 | 12.7757 | 251 | 251 | 15.69977 | 293 | 293 | 15.64427 | 15 | 15 | 1.208762 | 18 | 18 | 1.105679 | 30 | 30 | 1.639237 |
| 13 | 24040710..24061603 | LINC00327 | -9.82355 | 8.43E-10 | 22 | 22 | 0.469141 | 11 | 11 | 0.236579 | 30 | 30 | 0.550773 | 1 | 1 | 0.027708 | 3 | 3 | 0.063364 | 1 | 2 | 0.037576 |
| 7 | 150382785..150390729 | GIMAP2 | -9.80065 | 6.8E-07 | 10 | 10 | 0.332123 | 16 | 16 | 0.535946 | 13 | 13 | 0.371717 | 0 | 0 | 0 | 2 | 2 | 0.065791 | 1 | 1 | 0.029262 |
| 7 | 30893010..30965131 | AQP1_2 | -9.73171 | 1.95E-50 | 94 | 149 | 3.270494 | 110 | 173 | 3.829795 | 141 | 210 | 3.968411 | 10 | 12 | 0.342248 | 12 | 18 | 0.391326 | 7 | 10 | 0.193388 |
| 1 | 55007930..55104865 | ACOT11 | -9.7129 | 1.4E-25 | 51 | 70 | 0.499102 | 64 | 80 | 0.575286 | 64 | 90 | 0.552464 | 4 | 5 | 0.046323 | 5 | 5 | 0.03531 | 6 | 6 | 0.037692 |
| 8 | 22435792..22455538 | PDLIM2 | -9.71016 | 1.27E-44 | 1069 | 2164 | 19.64728 | 1044 | 2173 | 19.8979 | 1212 | 2420 | 18.91607 | 68 | 151 | 1.78137 | 101 | 205 | 1.843478 | 116 | 288 | 2.303779 |
| X | 129305623..129318844 | RAB33A | -9.6439 | 2.9E-36 | 81 | 81 | 4.484371 | 70 | 70 | 3.908561 | 85 | 85 | 4.051406 | 8 | 8 | 0.575491 | 5 | 5 | 0.274174 | 7 | 7 | 0.341443 |
| 7 | 87031013..87109751 | ABCB4 | -9.64218 | 1.21E-08 | 14 | 14 | 0.13011 | 16 | 16 | 0.14997 | 20 | 20 | 0.160024 | 0 | 0 | 0 | 1 | 1 | 0.009205 | 3 | 3 | 0.024564 |
| 12 | 9220260..9268825 | A2M | -9.64019 | 0 | 4488 | 4510 | 49.20178 | 4902 | 4923 | 54.1672 | 5992 | 6021 | 56.55138 | 334 | 335 | 4.74877 | 476 | 481 | 5.197426 | 514 | 514 | 4.940495 |
| 12 | 110220890..110271212 | TRPV4 | -9.63521 | 3.06E-20 | 50 | 50 | 0.924916 | 44 | 44 | 0.820894 | 49 | 49 | 0.780366 | 7 | 7 | 0.168253 | 4 | 4 | 0.073288 | 1 | 1 | 0.016298 |
| 3 | 130279178..130396999 | COL6A6 | -9.6075 | 8.7E-194 | 458 | 458 | 3.277298 | 476 | 476 | 3.435261 | 560 | 560 | 3.449918 | 30 | 30 | 0.278935 | 41 | 41 | 0.290585 | 58 | 58 | 0.365663 |
| 7 | 79998891..80308593 | CD36 | -9.57132 | 1.56E-17 | 33 | 33 | 0.230108 | 39 | 39 | 0.274275 | 47 | 48 | 0.288158 | 4 | 4 | 0.036242 | 3 | 3 | 0.020719 | 3 | 3 | 0.018431 |
| 12 | 80799774..81072802 | PTPRQ | -9.55637 | 4.04E-20 | 34 | 34 | 0.227733 | 45 | 46 | 0.310747 | 51 | 51 | 0.294095 | 0 | 0 | 0 | 3 | 3 | 0.019902 | 8 | 8 | 0.047211 |
| 15 | 33009471..33011208 | RP11-758N13.1 | -9.55511 | 0.029732 | 7 | 28 | 3.397373 | 6 | 31 | 3.79358 | 2 | 21 | 2.193688 | 1 | 5 | 0.788292 | 0 | 1 | 0.120178 | 0 | 5 | 0.534513 |
| 5 | 95187936..95195837 | C5orf27 | -9.54797 | 0.007645 | 3 | 4 | 0.135762 | 7 | 7 | 0.239618 | 5 | 5 | 0.146103 | 0 | 1 | 0.044101 | 0 | 1 | 0.033617 | 1 | 1 | 0.029904 |
| X | 47842756..47931025 | ZNF630 | -9.53284 | 0.007751 | 1 | 2 | 0.038068 | 6 | 17 | 0.326352 | 8 | 21 | 0.344131 | 0 | 1 | 0.024732 | 0 | 2 | 0.037705 | 1 | 1 | 0.01677 |
| 11 | 60618413..60623444 | PTGDR2 | -9.52899 | 1.77E-12 | 20 | 20 | 0.481148 | 31 | 31 | 0.752164 | 33 | 33 | 0.683491 | 3 | 3 | 0.093778 | 3 | 3 | 0.071484 | 1 | 1 | 0.021196 |
| 7 | 98444111..98468394 | TMEM130 | -9.50839 | 1.7E-112 | 245 | 249 | 3.719042 | 229 | 230 | 3.46467 | 274 | 275 | 3.536183 | 18 | 18 | 0.34933 | 26 | 26 | 0.384631 | 21 | 21 | 0.276347 |
| 1 | 161154098..161168846 | ADAMTS4 | -9.49637 | 1.69E-14 | 29 | 46 | 0.310018 | 32 | 55 | 0.373847 | 34 | 47 | 0.272707 | 2 | 2 | 0.017514 | 4 | 5 | 0.033376 | 2 | 5 | 0.029689 |
| 2 | 74759541..74782817 | LOXL3 | -9.49067 | 7.8E-100 | 209 | 247 | 3.942837 | 214 | 254 | 4.08929 | 230 | 273 | 3.751845 | 13 | 16 | 0.331867 | 16 | 18 | 0.284592 | 28 | 29 | 0.407862 |
| 10 | 44787706..44789157 | RP11-20J15.3 | -9.47977 | 4.58E-07 | 22 | 22 | 1.674552 | 17 | 17 | 1.30505 | 10 | 10 | 0.655309 | 3 | 3 | 0.296708 | 0 | 0 | 0 | 1 | 1 | 0.067062 |
| 22 | 42470255..42475445 | FAM109B | -9.45537 | 3.9E-125 | 470 | 470 | 13.35524 | 428 | 428 | 12.26591 | 438 | 438 | 10.71515 | 27 | 27 | 0.996896 | 48 | 48 | 1.350934 | 43 | 43 | 1.076528 |
| 8 | 70378859..70573150 | SULF1 | -9.45434 | 0 | 8047 | 8047 | 59.59619 | 8771 | 8771 | 65.51428 | 10694 | 10694 | 68.18597 | 632 | 632 | 6.081821 | 817 | 817 | 5.993018 | 965 | 965 | 6.296728 |
| 19 | 33463115..33469128 | C19orf40 | -9.43979 | 7.79E-16 | 30 | 30 | 0.881597 | 31 | 31 | 0.918783 | 45 | 45 | 1.138496 | 3 | 3 | 0.114552 | 2 | 2 | 0.058213 | 4 | 4 | 0.103565 |
| 17 | 67410839..67539472 | MAP2K6 | -9.40965 | 4.97E-17 | 31 | 31 | 0.352495 | 38 | 38 | 0.43579 | 48 | 48 | 0.469897 | 3 | 3 | 0.044325 | 4 | 4 | 0.04505 | 3 | 3 | 0.030055 |
| 5 | 170846660..170884627 | FGF18 | -9.40453 | 2.02E-31 | 86 | 86 | 3.015896 | 87 | 87 | 3.077085 | 79 | 79 | 2.385148 | 10 | 10 | 0.455669 | 1 | 1 | 0.034734 | 11 | 11 | 0.339871 |
| 2 | 42994229..43019733 | HAAO | -9.40109 | 6.3E-25 | 52 | 52 | 1.32854 | 47 | 47 | 1.211076 | 63 | 63 | 1.385741 | 3 | 3 | 0.099592 | 3 | 3 | 0.075916 | 8 | 8 | 0.18008 |
| 3 | 130745694..131069309 | NEK11 | -9.38743 | 4.3E-43 | 86 | 98 | 1.27815 | 86 | 104 | 1.368017 | 103 | 126 | 1.414806 | 8 | 11 | 0.186415 | 6 | 7 | 0.090426 | 10 | 11 | 0.126401 |
| 19 | 1782074..1812275 | ATP8B3 | -9.38733 | 3.06E-20 | 44 | 44 | 0.437089 | 50 | 50 | 0.500944 | 45 | 45 | 0.384858 | 4 | 4 | 0.051631 | 5 | 8 | 0.078713 | 3 | 3 | 0.026257 |
| 20 | 54944445..54967393 | AURKA | -9.38343 | 5.97E-91 | 183 | 191 | 4.543175 | 176 | 182 | 4.366161 | 246 | 253 | 5.18104 | 16 | 16 | 0.494513 | 21 | 23 | 0.541867 | 16 | 16 | 0.335312 |
| 8 | 41510739..41754280 | ANK1 | -9.3633 | 0.000512 | 10 | 10 | 0.064493 | 6 | 6 | 0.039027 | 10 | 10 | 0.055524 | 1 | 1 | 0.00838 | 0 | 0 | 0 | 1 | 1 | 0.005682 |
| 8 | 68334360..68658620 | CPA6 | -9.35847 | 0.000122 | 8 | 8 | 0.228817 | 5 | 5 | 0.144235 | 13 | 13 | 0.320119 | 0 | 0 | 0 | 0 | 0 | 0 | 2 | 2 | 0.0504 |
| 1 | 68939835..68962904 | DEPDC1 | -9.34164 | 2.44E-20 | 34 | 44 | 0.519043 | 54 | 61 | 0.725743 | 62 | 67 | 0.68045 | 2 | 2 | 0.030656 | 7 | 7 | 0.081788 | 4 | 5 | 0.051967 |
| 11 | 66824289..66839484 | RHOD | -9.33782 | 4E-101 | 221 | 221 | 12.16743 | 201 | 201 | 11.16105 | 246 | 246 | 11.66036 | 21 | 21 | 1.502304 | 18 | 18 | 0.981563 | 20 | 20 | 0.970152 |
| 12 | 58165275..58176324 | METTL21B | -9.32164 | 3.74E-10 | 13 | 61 | 1.339349 | 26 | 77 | 1.705128 | 32 | 112 | 2.117153 | 2 | 9 | 0.256767 | 1 | 8 | 0.173977 | 3 | 18 | 0.348209 |
| 17 | 18012020..18083116 | MYO15A | -9.31742 | 1.62E-18 | 41 | 47 | 0.203226 | 37 | 38 | 0.165718 | 49 | 54 | 0.201023 | 4 | 4 | 0.022474 | 3 | 3 | 0.012848 | 4 | 4 | 0.015239 |
| 12 | 108983622..108992096 | TMEM119 | -9.31289 | 0 | 7720 | 7720 | 168.6009 | 6885 | 6885 | 151.6523 | 8324 | 8325 | 156.5299 | 573 | 573 | 16.26033 | 707 | 707 | 15.29329 | 761 | 762 | 14.66225 |
| 19 | 4639530..4655580 | TNFAIP8L1 | -9.30716 | 5.73E-06 | 14 | 128 | 2.252895 | 14 | 119 | 2.11242 | 9 | 118 | 1.788065 | 2 | 18 | 0.411657 | 0 | 24 | 0.41839 | 1 | 24 | 0.372173 |
| 3 | 51976361..51982883 | PARP3 | -9.29254 | 2.9E-151 | 438 | 438 | 10.41838 | 399 | 399 | 9.571969 | 448 | 448 | 9.174331 | 28 | 28 | 0.865399 | 41 | 41 | 0.965937 | 46 | 46 | 0.964022 |
| 19 | 8271620..8327305 | CERS4 | -9.24831 | 1.73E-07 | 14 | 14 | 0.240218 | 13 | 13 | 0.22497 | 21 | 21 | 0.310219 | 1 | 1 | 0.022295 | 1 | 1 | 0.016995 | 2 | 2 | 0.030235 |
| 4 | 154265801..154336270 | MND1 | -9.24009 | 3.3E-09 | 19 | 19 | 0.874605 | 18 | 18 | 0.835667 | 22 | 22 | 0.871869 | 0 | 0 | 0 | 2 | 2 | 0.091186 | 3 | 3 | 0.12167 |
| 16 | 46614466..46655538 | SHCBP1 | -9.20877 | 1.6E-54 | 109 | 109 | 1.702496 | 118 | 118 | 1.858848 | 166 | 166 | 2.232226 | 7 | 7 | 0.142066 | 17 | 17 | 0.262995 | 11 | 11 | 0.151375 |
| 15 | 50150435..50475014 | ATP8B4 | -9.20547 | 1.34E-18 | 46 | 46 | 0.294975 | 38 | 39 | 0.252229 | 41 | 41 | 0.226351 | 1 | 1 | 0.008332 | 4 | 4 | 0.025405 | 6 | 6 | 0.033899 |
| 16 | 11343476..11445619 | RMI2 | -9.18963 | 4.44E-19 | 51 | 51 | 1.315051 | 43 | 43 | 1.118261 | 42 | 42 | 0.932378 | 6 | 6 | 0.201028 | 1 | 1 | 0.025539 | 5 | 5 | 0.113591 |
| 12 | 4647950..4669214 | RAD51AP1 | -9.17984 | 4.27E-17 | 35 | 35 | 0.947751 | 34 | 34 | 0.928555 | 45 | 45 | 1.049081 | 2 | 2 | 0.07037 | 4 | 4 | 0.107282 | 4 | 4 | 0.095431 |
| 11 | 6642556..6677085 | DCHS1 | -9.17927 | 2.1E-38 | 904 | 1107 | 7.163271 | 900 | 1104 | 7.20502 | 1020 | 1251 | 6.969336 | 74 | 87 | 0.731501 | 93 | 121 | 0.775511 | 88 | 108 | 0.61573 |
| 6 | 36095586..36107842 | MAPK13 | -9.14875 | 5.16E-47 | 87 | 87 | 2.213008 | 96 | 96 | 2.462846 | 118 | 118 | 2.58414 | 6 | 6 | 0.198311 | 7 | 7 | 0.17636 | 14 | 14 | 0.313758 |

| 11 | 47236493..47260767 | DDB2 | -9.13471 | 2.2E-172 | 495 | 495 | 18.67543 | 448 | 448 | 17.04691 | 542 | 542 | 17.60496 | 35 | 35 | 1.715796 | 40 | 40 | 1.494736 | 60 | 60 | 1.994435 |
| --- | --- | --- | --- | --- | --- | --- | --- | --- | --- | --- | --- | --- | --- | --- | --- | --- | --- | --- | --- | --- | --- | --- |
| 3 | 121150278..121264853 | POLQ | -9.09129 | 1.4E-16 | 25 | 25 | 0.191357 | 46 | 46 | 0.355111 | 53 | 53 | 0.349261 | 1 | 1 | 0.009946 | 5 | 5 | 0.037906 | 5 | 5 | 0.033719 |
| 19 | 20451078..20607775 | ZNF826P | -9.06584 | 1.41E-11 | 19 | 19 | 0.191059 | 25 | 25 | 0.253546 | 36 | 36 | 0.311665 | 3 | 3 | 0.039198 | 2 | 2 | 0.01992 | 2 | 2 | 0.017719 |
| 19 | 41931264..41934635 | B3GNT8 | -9.06083 | 6.8E-22 | 45 | 74 | 2.750168 | 50 | 91 | 3.410918 | 50 | 80 | 2.559693 | 1 | 3 | 0.144871 | 10 | 12 | 0.441721 | 2 | 7 | 0.229207 |
| 2 | 170366212..170382772 | KLHL41 | -9.03766 | 1.24E-06 | 14 | 65 | 1.727863 | 11 | 61 | 1.635415 | 22 | 84 | 1.922408 | 3 | 5 | 0.172702 | 1 | 5 | 0.131645 | 0 | 1 | 0.023421 |
| 1 | 197053258..197115824 | ASPM | -9.00982 | 5.1E-127 | 280 | 280 | 1.791212 | 322 | 322 | 2.077529 | 400 | 400 | 2.203024 | 18 | 18 | 0.149621 | 34 | 34 | 0.21543 | 40 | 40 | 0.225451 |
| 9 | 113431051..113563859 | MUSK | -9.00866 | 0.000865 | 9 | 9 | 0.150713 | 7 | 7 | 0.118225 | 9 | 9 | 0.129754 | 1 | 1 | 0.021759 | 1 | 1 | 0.016586 | 0 | 0 | 0 |
| 3 | 45123770..45187914 | CDCP1 | -8.99782 | 6.1E-168 | 555 | 555 | 5.940313 | 521 | 521 | 5.624143 | 653 | 653 | 6.017275 | 43 | 43 | 0.598022 | 63 | 63 | 0.667876 | 53 | 53 | 0.499799 |
| 10 | 27961804..28034989 | MKX | -8.98376 | 1.48E-36 | 75 | 77 | 1.306077 | 69 | 73 | 1.24883 | 98 | 100 | 1.460322 | 8 | 8 | 0.176319 | 7 | 7 | 0.117602 | 7 | 7 | 0.104611 |
| 1 | 9242066..9262678 | RP3-510D11.1 | -8.94196 | 0.014022 | 9 | 11 | 1.702462 | 2 | 2 | 0.312189 | 3 | 3 | 0.399739 | 0 | 0 | 0 | 0 | 0 | 0 | 1 | 1 | 0.13636 |
| 14 | 23352374..23356895 | REM2 | -8.93134 | 0.013668 | 3 | 3 | 0.090646 | 7 | 7 | 0.213318 | 4 | 4 | 0.104053 | 0 | 0 | 0 | 0 | 0 | 0 | 1 | 1 | 0.026621 |
| 5 | 38461029..38468441 | CTD-2263F21.1 | -8.92983 | 0.013668 | 7 | 7 | 0.673374 | 3 | 3 | 0.29106 | 4 | 4 | 0.331275 | 0 | 0 | 0 | 1 | 1 | 0.095279 | 0 | 0 | 0 |
| 22 | 46937392..46944093 | RP3-439F8.1 | -8.92983 | 0.013668 | 7 | 7 | 0.165318 | 3 | 3 | 0.071457 | 4 | 4 | 0.08133 | 0 | 0 | 0 | 1 | 1 | 0.023392 | 0 | 0 | 0 |
| 2 | 102927989..103015218 | IL18R1 | -8.92407 | 0.013696 | 2 | 2 | 0.032125 | 7 | 7 | 0.113399 | 5 | 5 | 0.069143 | 0 | 0 | 0 | 1 | 1 | 0.015909 | 0 | 0 | 0 |
| 2 | 182818968..182996125 | PPP1R1C | -8.92271 | 0.013589 | 3 | 3 | 0.042372 | 5 | 5 | 0.071225 | 6 | 6 | 0.07296 | 0 | 0 | 0 | 0 | 0 | 0 | 1 | 1 | 0.012444 |
| 19 | 708953..748329 | PALM | -8.92171 | 5.42E-50 | 189 | 189 | 2.524089 | 156 | 156 | 2.101211 | 149 | 149 | 1.713166 | 14 | 14 | 0.242942 | 16 | 16 | 0.211642 | 16 | 16 | 0.188263 |
| 13 | 84451344..84456528 | SLITRK1 | -8.91251 | 0.013777 | 1 | 1 | 0.013432 | 5 | 5 | 0.067736 | 8 | 8 | 0.092514 | 0 | 0 | 0 | 0 | 0 | 0 | 1 | 1 | 0.011835 |
| 8 | 95390605..95449180 | FSBP | -8.91251 | 0.013777 | 1 | 7 | 0.153213 | 5 | 12 | 0.264899 | 8 | 26 | 0.489937 | 0 | 3 | 0.08532 | 0 | 0 | 0 | 1 | 2 | 0.038568 |
| 3 | 157261035..157395538 | C3orf55 | -8.8715 | 2.11E-26 | 62 | 62 | 1.357881 | 58 | 58 | 1.281151 | 65 | 65 | 1.225614 | 7 | 7 | 0.199205 | 6 | 6 | 0.130155 | 4 | 4 | 0.077185 |
| 19 | 11649532..11661138 | CNN1 | -8.83494 | 1E-144 | 349 | 349 | 8.270332 | 353 | 353 | 8.436738 | 385 | 385 | 7.854682 | 27 | 27 | 0.831368 | 40 | 40 | 0.938851 | 35 | 35 | 0.73075 |
| 17 | 74523438..74547257 | CYGB | -8.82781 | 4.8E-158 | 573 | 1490 | 35.18914 | 562 | 1293 | 30.79805 | 615 | 1397 | 28.40463 | 42 | 84 | 2.577708 | 52 | 119 | 2.783609 | 71 | 140 | 2.913087 |
| 15 | 85113880..85123406 | LINC00933 | -8.81531 | 1.04E-06 | 10 | 10 | 0.232154 | 9 | 10 | 0.234141 | 27 | 27 | 0.539647 | 1 | 1 | 0.030165 | 1 | 1 | 0.022994 | 2 | 2 | 0.040908 |
| 1 | 159931008..159948851 | LINC01133 | -8.80322 | 9.34E-20 | 53 | 53 | 2.915676 | 35 | 35 | 1.941931 | 53 | 53 | 2.510208 | 4 | 4 | 0.285927 | 1 | 1 | 0.054488 | 8 | 8 | 0.387754 |
| 1 | 13909960..13944452 | PDPN | -8.79314 | 7.61E-13 | 23 | 23 | 0.432118 | 32 | 32 | 0.606355 | 33 | 33 | 0.533776 | 3 | 3 | 0.073237 | 2 | 2 | 0.037217 | 3 | 3 | 0.049659 |
| X | 74588262..74743337 | ZDHHC15 | -8.79152 | 3.65E-05 | 5 | 5 | 0.05106 | 18 | 18 | 0.185391 | 12 | 12 | 0.105503 | 2 | 2 | 0.026538 | 0 | 0 | 0 | 1 | 1 | 0.008997 |
| 15 | 56713742..56757335 | MNS1 | -8.76498 | 1.78E-29 | 67 | 78 | 2.169489 | 69 | 87 | 2.440531 | 67 | 87 | 2.083303 | 2 | 4 | 0.144562 | 6 | 9 | 0.247939 | 11 | 14 | 0.343079 |
| 19 | 14583278..14586174 | PTGER1 | -8.74762 | 9.76E-29 | 71 | 71 | 3.479857 | 66 | 66 | 3.262491 | 66 | 66 | 2.784949 | 5 | 5 | 0.318424 | 9 | 9 | 0.436903 | 5 | 5 | 0.215912 |
| 19 | 50392911..50432796 | IL4I1 | -8.72123 | 7.84E-14 | 35 | 35 | 0.951079 | 21 | 21 | 0.575533 | 42 | 42 | 0.982581 | 3 | 3 | 0.105926 | 4 | 4 | 0.107658 | 2 | 2 | 0.047883 |
| 1 | 53068044..53074723 | GPX7 | -8.68899 | 3.14E-67 | 130 | 130 | 5.354228 | 119 | 119 | 4.943139 | 163 | 163 | 5.779782 | 10 | 10 | 0.535162 | 15 | 15 | 0.611905 | 14 | 14 | 0.508025 |
| 6 | 35265595..35289548 | DEF6 | -8.68616 | 4.97E-07 | 13 | 13 | 0.338467 | 16 | 16 | 0.420142 | 16 | 16 | 0.358644 | 1 | 1 | 0.03383 | 1 | 1 | 0.025788 | 2 | 2 | 0.045878 |
| 15 | 42640301..42704515 | RP11-164J13.1 | -8.66273 | 0.001528 | 8 | 34 | 0.50706 | 11 | 20 | 0.300824 | 5 | 17 | 0.218273 | 2 | 5 | 0.096891 | 0 | 5 | 0.073857 | 0 | 8 | 0.105117 |
| 15 | 93586636..93632433 | RGMA | -8.65853 | 1.19E-21 | 84 | 84 | 1.022955 | 70 | 70 | 0.85976 | 56 | 56 | 0.587132 | 7 | 7 | 0.110766 | 7 | 7 | 0.084433 | 6 | 6 | 0.064377 |
| 2 | 219246752..219261617 | SLC11A1 | -8.65845 | 0.000373 | 9 | 9 | 0.072247 | 5 | 5 | 0.040481 | 10 | 10 | 0.069111 | 0 | 0 | 0 | 0 | 0 | 0 | 2 | 2 | 0.014145 |
| 6 | 33244917..33252609 | B3GALT4 | -8.65619 | 6.01E-84 | 192 | 192 | 5.695086 | 187 | 188 | 5.62418 | 195 | 196 | 5.005246 | 13 | 13 | 0.501042 | 15 | 16 | 0.470065 | 27 | 28 | 0.731746 |
| 10 | 128933694..128994422 | FAM196A | -8.65278 | 0.001519 | 11 | 59 | 0.933255 | 4 | 50 | 0.797665 | 9 | 69 | 0.939654 | 1 | 5 | 0.102766 | 1 | 10 | 0.156671 | 0 | 11 | 0.153301 |
| 1 | 230838269..230850043 | AGT | -8.65137 | 1.96E-39 | 91 | 91 | 2.76639 | 78 | 78 | 2.391492 | 116 | 117 | 3.062163 | 7 | 7 | 0.276504 | 8 | 8 | 0.24088 | 12 | 12 | 0.321408 |
| 6 | 32811863..32814272 | TAPSAR1 | -8.6495 | 0.000389 | 10 | 27 | 0.963837 | 3 | 14 | 0.504046 | 11 | 22 | 0.676134 | 0 | 6 | 0.278306 | 2 | 2 | 0.070715 | 0 | 7 | 0.220161 |
| 3 | 151143172..151176497 | IGSF10 | -8.63563 | 3E-183 | 1266 | 1340 | 7.958203 | 1430 | 1529 | 9.158409 | 1850 | 1972 | 10.08295 | 113 | 117 | 0.902876 | 129 | 137 | 0.805879 | 194 | 211 | 1.104068 |
| 6 | 31949801..31970458 | C4A | -8.62658 | 4.45E-76 | 322 | 589 | 5.698234 | 217 | 438 | 4.273674 | 344 | 703 | 5.85532 | 18 | 34 | 0.427401 | 29 | 70 | 0.670752 | 38 | 66 | 0.562564 |
| 14 | 24895738..24900160 | CBLN3 | -8.60153 | 1.29E-31 | 81 | 88 | 2.392218 | 70 | 72 | 1.974026 | 80 | 85 | 1.989332 | 7 | 8 | 0.282579 | 10 | 13 | 0.350026 | 5 | 5 | 0.119754 |
| 22 | 50964181..50968485 | TYMP | -8.59865 | 2.33E-30 | 357 | 432 | 9.062391 | 238 | 298 | 6.304892 | 254 | 296 | 5.345903 | 34 | 43 | 1.172086 | 22 | 27 | 0.560999 | 25 | 30 | 0.554477 |
| 14 | 23825611..23834961 | EFS | -8.54263 | 1.9E-133 | 374 | 415 | 8.928994 | 345 | 386 | 8.376143 | 381 | 423 | 7.835471 | 29 | 32 | 0.894616 | 33 | 35 | 0.745867 | 45 | 48 | 0.909911 |
| 16 | 28548606..28550495 | NUPR1 | -8.53268 | 3.6E-119 | 4600 | 4600 | 292.044 | 3564 | 3564 | 228.2078 | 3338 | 3338 | 182.4514 | 286 | 286 | 23.5933 | 418 | 418 | 26.28487 | 437 | 437 | 24.44416 |
| 20 | 36838890..36889174 | KIAA1755 | -8.53193 | 1.03E-85 | 224 | 239 | 2.094555 | 185 | 195 | 1.723578 | 220 | 230 | 1.73537 | 19 | 20 | 0.227749 | 18 | 19 | 0.164925 | 24 | 24 | 0.185314 |
| 22 | 37886400..37915549 | CARD10 | -8.53188 | 6.84E-29 | 63 | 63 | 0.776311 | 61 | 61 | 0.758101 | 96 | 96 | 1.018443 | 6 | 6 | 0.096068 | 11 | 11 | 0.134254 | 4 | 4 | 0.043427 |
| 9 | 136028340..136039332 | GBGT1 | -8.52228 | 2.55E-07 | 20 | 96 | 1.803137 | 13 | 84 | 1.591252 | 11 | 81 | 1.309823 | 0 | 7 | 0.170839 | 2 | 16 | 0.297657 | 2 | 12 | 0.198583 |
| 12 | 104382762..104457961 | GLT8D2 | -8.50408 | 2E-145 | 346 | 346 | 7.367034 | 393 | 393 | 8.439398 | 479 | 479 | 8.780564 | 39 | 39 | 1.07898 | 36 | 36 | 0.759203 | 43 | 43 | 0.806656 |
| 21 | 33245628..33416946 | HUNK | -8.49171 | 8.67E-07 | 16 | 16 | 0.134355 | 11 | 11 | 0.09316 | 17 | 17 | 0.1229 | 1 | 1 | 0.010911 | 1 | 1 | 0.008317 | 2 | 2 | 0.014797 |
| 5 | 52776239..52782964 | FST | -8.48789 | 0 | 2871 | 2871 | 67.34729 | 3179 | 3179 | 75.21073 | 3563 | 3563 | 71.95701 | 261 | 261 | 7.955354 | 334 | 334 | 7.760191 | 343 | 343 | 7.088987 |

| 3 | 49842640..49851379 | UBA7 | -8.48079 | 7.7E-145 | 806 | 806 | 12.35089 | 793 | 793 | 12.25572 | 847 | 847 | 11.17421 | 67 | 67 | 1.334044 | 78 | 78 | 1.18385 | 95 | 95 | 1.282596 |
| --- | --- | --- | --- | --- | --- | --- | --- | --- | --- | --- | --- | --- | --- | --- | --- | --- | --- | --- | --- | --- | --- | --- |
| 6 | 14117872..14137149 | CD83 | -8.48041 | 6.25E-32 | 64 | 64 | 1.803866 | 75 | 75 | 2.132004 | 89 | 89 | 2.159657 | 4 | 4 | 0.146493 | 12 | 12 | 0.335 | 6 | 6 | 0.148997 |
| 22 | 38480896..38506677 | BAIAP2L2 | -8.44687 | 2.37E-16 | 58 | 58 | 1.841147 | 39 | 39 | 1.248612 | 37 | 37 | 1.01119 | 2 | 2 | 0.082494 | 6 | 6 | 0.188647 | 5 | 5 | 0.139841 |
| 9 | 38392661..38398658 | ALDH1B1 | -8.41512 | 9.7E-173 | 629 | 629 | 14.28814 | 612 | 612 | 14.02099 | 700 | 700 | 13.68968 | 42 | 42 | 1.239671 | 74 | 74 | 1.664929 | 76 | 76 | 1.521044 |
| 17 | 6347735..6354789 | FAM64A | -8.39808 | 2.13E-39 | 115 | 115 | 2.837162 | 100 | 101 | 2.513101 | 112 | 112 | 2.378891 | 12 | 12 | 0.38468 | 15 | 15 | 0.366536 | 5 | 5 | 0.108682 |
| 11 | 289135..296107 | ATHL1 | -8.38566 | 3.51E-82 | 204 | 204 | 2.701106 | 223 | 223 | 2.977958 | 208 | 208 | 2.371074 | 12 | 12 | 0.206455 | 28 | 28 | 0.367205 | 23 | 23 | 0.268313 |
| 1 | 224622362..224928251 | CNIH3 | -8.37022 | 1.07E-59 | 128 | 132 | 1.439601 | 132 | 138 | 1.517923 | 157 | 168 | 1.577422 | 14 | 21 | 0.297591 | 13 | 23 | 0.248448 | 14 | 25 | 0.240221 |
| 1 | 7844380..7905237 | PER3 | -8.32942 | 3.6E-151 | 370 | 451 | 4.421511 | 392 | 493 | 4.87465 | 519 | 664 | 5.604445 | 33 | 39 | 0.496811 | 40 | 48 | 0.466095 | 54 | 63 | 0.544174 |
| 17 | 76356534..76369992 | RP11-806H10.4 | -8.32108 | 0.02452 | 3 | 3 | 0.175874 | 8 | 8 | 0.473013 | 2 | 2 | 0.100944 | 0 | 0 | 0 | 0 | 0 | 0 | 1 | 1 | 0.051652 |
| 5 | 176829141..176836577 | F12 | -8.31753 | 0.02449 | 7 | 7 | 0.176065 | 5 | 6 | 0.152205 | 1 | 3 | 0.064963 | 1 | 1 | 0.032682 | 0 | 1 | 0.024912 | 0 | 0 | 0 |
| 21 | 46409779..46414001 | LINC00163 | -8.31694 | 0.024324 | 4 | 4 | 0.129274 | 7 | 7 | 0.228166 | 2 | 2 | 0.055648 | 0 | 0 | 0 | 1 | 1 | 0.03201 | 0 | 0 | 0 |
| 19 | 46171502..46186982 | GIPR | -8.31686 | 0.024436 | 6 | 6 | 0.088234 | 6 | 6 | 0.08899 | 1 | 1 | 0.012661 | 1 | 1 | 0.019108 | 0 | 0 | 0 | 0 | 0 | 0 |
| 5 | 79287134..79379110 | THBS4 | -8.31419 | 0.024146 | 4 | 4 | 0.060496 | 6 | 6 | 0.091521 | 3 | 3 | 0.039062 | 0 | 0 | 0 | 0 | 0 | 0 | 1 | 1 | 0.013325 |
| 11 | 69061605..69182494 | MYEOV | -8.31372 | 0.000669 | 11 | 11 | 0.203752 | 6 | 6 | 0.112089 | 6 | 6 | 0.095682 | 0 | 0 | 0 | 2 | 2 | 0.036693 | 0 | 0 | 0 |
| 19 | 35531410..35557475 | HPN | -8.31013 | 0.024057 | 5 | 6 | 0.123632 | 4 | 4 | 0.083127 | 4 | 4 | 0.07096 | 0 | 0 | 0 | 0 | 0 | 0 | 1 | 1 | 0.018154 |
| 3 | 119355304..119384171 | POPDC2 | -8.309 | 0.0243 | 7 | 8 | 0.227881 | 2 | 3 | 0.086187 | 4 | 4 | 0.098095 | 0 | 1 | 0.037013 | 1 | 2 | 0.056427 | 0 | 0 | 0 |
| 3 | 59735036..61237133 | FHIT | -8.3072 | 3.41E-07 | 13 | 13 | 0.166464 | 14 | 14 | 0.180804 | 16 | 16 | 0.176388 | 0 | 0 | 0 | 1 | 1 | 0.012683 | 3 | 3 | 0.033846 |
| 10 | 134621896..134756327 | TTC40 | -8.30615 | 0.000674 | 11 | 11 | 0.072541 | 4 | 4 | 0.026604 | 8 | 8 | 0.045421 | 0 | 0 | 0 | 2 | 2 | 0.013064 | 0 | 0 | 0 |
| 12 | 113416200..113449528 | OAS2 | -8.30543 | 0.002538 | 5 | 14 | 0.155659 | 11 | 26 | 0.291555 | 7 | 22 | 0.21059 | 1 | 3 | 0.043341 | 0 | 0 | 0 | 1 | 3 | 0.029388 |
| X | 44007128..44202918 | EFHC2 | -8.30331 | 0.02417 | 2 | 2 | 0.041968 | 6 | 6 | 0.126982 | 5 | 5 | 0.09033 | 0 | 0 | 0 | 1 | 1 | 0.020784 | 0 | 0 | 0 |
| 20 | 43374421..43379675 | KCNK15 | -8.30234 | 0.02413 | 3 | 3 | 0.158287 | 6 | 6 | 0.319284 | 4 | 4 | 0.181699 | 1 | 1 | 0.068558 | 0 | 0 | 0 | 0 | 0 | 0 |
| 19 | 859453..863453 | CFD | -8.30185 | 4.5E-121 | 735 | 735 | 41.44933 | 682 | 682 | 38.78974 | 643 | 643 | 31.21846 | 48 | 48 | 3.517252 | 73 | 73 | 4.077482 | 88 | 88 | 4.372361 |
| 9 | 116381508..116384914 | RP11-168K11.3 | -8.2942 | 0.000655 | 7 | 7 | 0.160211 | 5 | 5 | 0.115416 | 11 | 11 | 0.21675 | 0 | 0 | 0 | 2 | 2 | 0.045338 | 0 | 0 | 0 |
| 8 | 69242957..69731257 | C8orf34 | -8.27662 | 8.43E-05 | 6 | 7 | 0.046435 | 9 | 10 | 0.066904 | 18 | 19 | 0.108511 | 1 | 1 | 0.008619 | 1 | 1 | 0.00657 | 1 | 1 | 0.005845 |
| 6 | 31512239..31516204 | ATP6V1G2 | -8.24587 | 1.85E-11 | 31 | 58 | 1.881452 | 31 | 53 | 1.733977 | 20 | 59 | 1.647735 | 2 | 7 | 0.29505 | 2 | 7 | 0.224907 | 4 | 7 | 0.200063 |
| 5 | 68462837..68474072 | CCNB1 | -8.15068 | 4.51E-97 | 207 | 207 | 5.635947 | 226 | 226 | 6.205937 | 246 | 246 | 5.766364 | 13 | 13 | 0.459909 | 33 | 33 | 0.889917 | 23 | 23 | 0.551731 |
| 19 | 43370616..43383974 | PSG1 | -8.14978 | 4.22E-70 | 133 | 159 | 2.232158 | 133 | 163 | 2.307904 | 169 | 205 | 2.477719 | 10 | 12 | 0.218898 | 14 | 16 | 0.222478 | 20 | 22 | 0.272116 |
| 1 | 176432307..176814735 | PAPPA2 | -8.10897 | 2.49E-06 | 14 | 14 | 0.089257 | 11 | 11 | 0.070731 | 17 | 17 | 0.093311 | 0 | 0 | 0 | 3 | 3 | 0.018944 | 1 | 1 | 0.005617 |
| 4 | 113739265..114304896 | ANK2 | -8.09265 | 5.02E-61 | 728 | 728 | 2.78401 | 801 | 801 | 3.089401 | 936 | 936 | 3.081667 | 72 | 72 | 0.35777 | 87 | 87 | 0.329532 | 93 | 93 | 0.313347 |
| 19 | 29456038..29461781 | LINC00906 | -8.07386 | 6.11E-06 | 8 | 8 | 0.133198 | 10 | 10 | 0.167924 | 24 | 24 | 0.344026 | 1 | 1 | 0.021634 | 0 | 0 | 0 | 3 | 3 | 0.044008 |
| 18 | 56529832..56653712 | ZNF532 | -8.05651 | 3.63E-40 | 997 | 1096 | 6.387096 | 1025 | 1154 | 6.782675 | 1213 | 1348 | 6.763214 | 77 | 83 | 0.628497 | 119 | 129 | 0.744598 | 138 | 142 | 0.729095 |
| X | 154505500..154563966 | CLIC2 | -8.04375 | 2.57E-22 | 56 | 56 | 1.373304 | 49 | 49 | 1.211929 | 63 | 63 | 1.330116 | 8 | 8 | 0.254918 | 7 | 7 | 0.170026 | 2 | 2 | 0.043213 |
| 10 | 13203554..13253104 | MCM10 | -8.00666 | 6.28E-15 | 31 | 31 | 0.395862 | 39 | 39 | 0.502284 | 39 | 39 | 0.428763 | 4 | 4 | 0.06637 | 3 | 3 | 0.037944 | 4 | 4 | 0.045003 |
| 11 | 2909010..2924970 | SLC22A18AS | -8.00467 | 4.46E-08 | 21 | 21 | 0.820746 | 11 | 11 | 0.433595 | 19 | 19 | 0.639313 | 0 | 0 | 0 | 0 | 0 | 0 | 5 | 5 | 0.172172 |
| 2 | 27301435..27309271 | EMILIN1 | -7.98671 | 0 | 16928 | 16928 | 298.2469 | 14594 | 14594 | 259.3265 | 14685 | 14685 | 222.7484 | 1372 | 1372 | 31.40917 | 1735 | 1735 | 30.27672 | 1712 | 1712 | 26.57524 |
| 2 | 162848751..162931052 | DPP4 | -7.98048 | 0 | 2855 | 3037 | 42.22706 | 3154 | 3296 | 46.2206 | 3933 | 4118 | 49.29499 | 282 | 296 | 5.347735 | 333 | 342 | 4.709895 | 415 | 433 | 5.30441 |
| 7 | 20367922..20371370 | CTA-293F17.1 | -7.94998 | 0.002778 | 4 | 4 | 0.31092 | 13 | 13 | 1.019142 | 5 | 5 | 0.334603 | 2 | 2 | 0.202 | 0 | 0 | 0 | 0 | 0 | 0 |
| 10 | 105206543..105212660 | CALHM2 | -7.93227 | 5.7E-166 | 1153 | 1203 | 23.14484 | 1022 | 1089 | 21.13094 | 1125 | 1192 | 19.744 | 88 | 92 | 2.299897 | 116 | 128 | 2.439144 | 144 | 151 | 2.55958 |
| 1 | 934342..935552 | HES4 | -7.91836 | 7.44E-11 | 34 | 34 | 2.11804 | 23 | 23 | 1.445059 | 22 | 22 | 1.179909 | 4 | 4 | 0.323778 | 2 | 2 | 0.123403 | 2 | 2 | 0.109771 |
| 7 | 100657601..100660889 | RP11-395B7.4 | -7.91644 | 8.49E-09 | 22 | 26 | 4.44914 | 17 | 19 | 3.27913 | 21 | 27 | 3.977744 | 1 | 1 | 0.222349 | 1 | 2 | 0.338978 | 4 | 4 | 0.603067 |
| 11 | 76493295..76509198 | TSKU | -7.89506 | 1.8E-105 | 253 | 253 | 4.265426 | 225 | 225 | 3.82584 | 275 | 275 | 3.991581 | 19 | 19 | 0.416224 | 29 | 29 | 0.48426 | 31 | 31 | 0.460476 |
| 8 | 120428546..120436593 | NOV | -7.86253 | 1.7E-187 | 513 | 708 | 18.44724 | 522 | 792 | 20.81257 | 595 | 977 | 21.91609 | 49 | 72 | 2.437602 | 49 | 87 | 2.245207 | 74 | 138 | 3.167965 |
| 19 | 49977464..49989488 | FLT3LG | -7.80734 | 4.53E-27 | 75 | 127 | 3.047919 | 76 | 114 | 2.759351 | 67 | 118 | 2.438103 | 4 | 9 | 0.280656 | 10 | 19 | 0.45164 | 9 | 16 | 0.338316 |
| 7 | 102553438..102585396 | LRRC17 | -7.77005 | 1.07E-97 | 221 | 912 | 23.75366 | 254 | 992 | 26.05852 | 338 | 1197 | 26.84109 | 24 | 67 | 2.267475 | 35 | 71 | 1.83161 | 27 | 66 | 1.514547 |
| 1 | 53361656..53392884 | ECHDC2 | -7.75971 | 1.1E-121 | 563 | 563 | 5.0001 | 545 | 545 | 4.881678 | 560 | 560 | 4.281822 | 36 | 36 | 0.415437 | 56 | 57 | 0.5014 | 89 | 89 | 0.696407 |
| 9 | 131683174..131704320 | PHYHD1 | -7.72028 | 2.69E-69 | 174 | 206 | 4.921821 | 167 | 208 | 5.012152 | 192 | 249 | 5.121866 | 20 | 23 | 0.714033 | 14 | 18 | 0.425961 | 23 | 27 | 0.568363 |
| 13 | 60239717..60738121 | DIAPH3 | -7.70842 | 3.87E-81 | 165 | 167 | 2.072507 | 162 | 162 | 2.027668 | 205 | 205 | 2.1903 | 11 | 11 | 0.17738 | 25 | 25 | 0.307297 | 21 | 26 | 0.284286 |
| 11 | 66774249..66818334 | SYT12 | -7.70799 | 0.024663 | 7 | 7 | 0.045016 | 5 | 5 | 0.03243 | 0 | 0 | 0 | 0 | 0 | 0 | 1 | 1 | 0.00637 | 0 | 0 | 0 |
| 16 | 87526161..87549241 | RP11-482M8.1 | -7.70787 | 0.044322 | 9 | 9 | 0.462253 | 1 | 1 | 0.051801 | 2 | 2 | 0.088438 | 0 | 0 | 0 | 0 | 0 | 0 | 1 | 1 | 0.045252 |

| 22 | 45809572..45828376 | RIBC2 | -7.6974 | 0.043405 | 8 | 8 | 0.30698 | 1 | 1 | 0.038701 | 3 | 3 | 0.099109 | 0 | 0 | 0 | 0 | 0 | 0 | 1 | 1 | 0.033808 |
| --- | --- | --- | --- | --- | --- | --- | --- | --- | --- | --- | --- | --- | --- | --- | --- | --- | --- | --- | --- | --- | --- | --- |
| 19 | 29374337..29444152 | AC011524.1 | -7.69496 | 0.042696 | 4 | 4 | 0.51878 | 6 | 6 | 0.784831 | 2 | 2 | 0.223318 | 0 | 0 | 0 | 1 | 1 | 0.128458 | 0 | 0 | 0 |
| 21 | 29811667..30047170 | AF131217.1 | -7.69489 | 3.55E-12 | 20 | 20 | 0.213246 | 28 | 28 | 0.3011 | 48 | 48 | 0.440618 | 2 | 2 | 0.027708 | 4 | 4 | 0.042243 | 4 | 4 | 0.037576 |
| 19 | 49977843..49990894 | CTD-3148I10.15 | -7.69293 | 0.042624 | 3 | 4 | 0.196048 | 6 | 8 | 0.395453 | 3 | 4 | 0.168785 | 0 | 0 | 0 | 0 | 0 | 0 | 1 | 2 | 0.086365 |
| 19 | 4542600..4559820 | SEMA6B | -7.68893 | 0.042643 | 2 | 2 | 0.031493 | 6 | 6 | 0.095287 | 4 | 4 | 0.054226 | 0 | 0 | 0 | 0 | 0 | 0 | 1 | 1 | 0.013873 |
| 2 | 113493930..113522254 | CKAP2L | -7.68831 | 6.27E-22 | 42 | 67 | 0.852602 | 53 | 71 | 0.911239 | 75 | 97 | 1.062708 | 5 | 5 | 0.082675 | 3 | 6 | 0.075624 | 10 | 12 | 0.134541 |
| 16 | 3981218..3996306 | RP11-462G12.2 | -7.68487 | 0.042783 | 1 | 1 | 0.089982 | 6 | 6 | 0.544515 | 5 | 5 | 0.387344 | 0 | 0 | 0 | 0 | 0 | 0 | 1 | 1 | 0.079279 |
| 20 | 43720951..43729753 | KCNS1 | -7.67959 | 0.042568 | 4 | 4 | 0.061389 | 2 | 2 | 0.030957 | 6 | 6 | 0.079278 | 0 | 0 | 0 | 1 | 1 | 0.015201 | 0 | 0 | 0 |
| X | 92929012..92967273 | FAM133A | -7.66974 | 0.0429 | 2 | 2 | 0.040776 | 2 | 2 | 0.041126 | 8 | 8 | 0.140423 | 0 | 0 | 0 | 1 | 1 | 0.020194 | 0 | 0 | 0 |
| 19 | 38045684..38085673 | ZNF571 | -7.66881 | 0.042792 | 1 | 12 | 0.140747 | 4 | 28 | 0.331221 | 7 | 37 | 0.373619 | 1 | 17 | 0.259082 | 0 | 13 | 0.151022 | 0 | 20 | 0.206676 |
| 5 | 72740654..72744352 | FOXD1 | -7.66484 | 0.043408 | 1 | 197 | 5.234755 | 2 | 125 | 3.349982 | 9 | 84 | 1.921674 | 0 | 121 | 4.177799 | 0 | 0 | 0 | 1 | 90 | 2.107054 |
| 19 | 10527449..10580305 | PDE4A | -7.65134 | 2.8E-126 | 492 | 492 | 5.157421 | 460 | 460 | 4.863262 | 489 | 489 | 4.41313 | 54 | 54 | 0.735518 | 43 | 43 | 0.446452 | 59 | 59 | 0.544907 |
| 17 | 16318856..16340317 | TRPV2 | -7.62988 | 1.74E-43 | 1239 | 1330 | 27.13222 | 1263 | 1346 | 27.6937 | 1541 | 1638 | 28.76854 | 126 | 132 | 3.498965 | 158 | 170 | 3.434959 | 154 | 160 | 2.875787 |
| 1 | 852245..856396 | RP11-54O7.3 | -7.60871 | 0.001166 | 10 | 10 | 0.384149 | 6 | 6 | 0.232462 | 5 | 5 | 0.165364 | 0 | 0 | 0 | 0 | 0 | 0 | 2 | 2 | 0.067691 |
| 6 | 36708552..36807778 | CPNE5 | -7.60115 | 0.001138 | 8 | 8 | 0.136998 | 7 | 7 | 0.120899 | 6 | 6 | 0.08846 | 0 | 0 | 0 | 1 | 1 | 0.016961 | 1 | 1 | 0.015088 |
| 8 | 21881636..21894408 | NPM2 | -7.58752 | 0.006969 | 6 | 6 | 0.202558 | 6 | 6 | 0.204292 | 9 | 9 | 0.261584 | 1 | 1 | 0.043866 | 0 | 0 | 0 | 1 | 1 | 0.029744 |
| 1 | 33145507..33169197 | SYNC | -7.58744 | 8.76E-90 | 851 | 1192 | 21.06527 | 736 | 1128 | 20.10491 | 807 | 1300 | 19.779 | 95 | 170 | 3.903657 | 81 | 206 | 3.605761 | 83 | 210 | 3.269739 |
| 19 | 18501954..18508427 | LRRC25 | -7.56959 | 5.98E-05 | 13 | 13 | 0.374907 | 9 | 9 | 0.261773 | 8 | 8 | 0.198628 | 0 | 0 | 0 | 2 | 2 | 0.057128 | 1 | 1 | 0.025409 |
| 13 | 23755091..23899304 | SGCG | -7.56237 | 5.81E-05 | 8 | 8 | 0.308852 | 11 | 11 | 0.428307 | 11 | 11 | 0.365615 | 0 | 0 | 0 | 0 | 0 | 0 | 3 | 3 | 0.102043 |
| 22 | 19701987..19712295 | SEPT5 | -7.5491 | 5E-150 | 383 | 519 | 6.111997 | 367 | 472 | 5.606091 | 424 | 536 | 5.434392 | 34 | 41 | 0.627382 | 45 | 50 | 0.58321 | 50 | 63 | 0.653671 |
| 1 | 36560837..36590821 | COL8A2 | -7.53638 | 6.4E-167 | 735 | 735 | 10.96144 | 715 | 715 | 10.75446 | 728 | 728 | 9.347209 | 63 | 63 | 1.220823 | 91 | 91 | 1.34419 | 87 | 87 | 1.143148 |
| 2 | 10182976..10194963 | KLF11 | -7.53539 | 6.58E-59 | 132 | 138 | 2.094393 | 168 | 171 | 2.617445 | 214 | 226 | 2.952962 | 17 | 21 | 0.414124 | 19 | 19 | 0.285609 | 20 | 23 | 0.307546 |
| 9 | 136528682..136605077 | SARDH | -7.51899 | 2.28E-08 | 17 | 17 | 0.219622 | 20 | 20 | 0.260591 | 20 | 20 | 0.222448 | 1 | 1 | 0.016786 | 3 | 3 | 0.038387 | 2 | 2 | 0.022765 |
| 15 | 91260558..91358859 | BLM | -7.51187 | 8.24E-08 | 16 | 16 | 0.18526 | 20 | 20 | 0.233557 | 21 | 21 | 0.209339 | 2 | 2 | 0.03009 | 3 | 3 | 0.034405 | 1 | 1 | 0.010202 |
| 10 | 91589267..91600618 | LINC00865 | -7.51065 | 3.82E-08 | 18 | 40 | 0.652118 | 16 | 24 | 0.39462 | 23 | 49 | 0.687753 | 2 | 2 | 0.042367 | 1 | 3 | 0.048442 | 3 | 3 | 0.043091 |
| 10 | 16865963..17171830 | CUBN | -7.50112 | 4.36E-08 | 15 | 15 | 0.079336 | 15 | 15 | 0.080015 | 27 | 27 | 0.122945 | 1 | 1 | 0.006872 | 3 | 3 | 0.015716 | 2 | 2 | 0.00932 |
| 3 | 169511216..169530774 | LRRC34 | -7.49572 | 9.86E-07 | 15 | 17 | 0.267325 | 8 | 12 | 0.190316 | 25 | 30 | 0.406147 | 1 | 1 | 0.020433 | 3 | 5 | 0.077875 | 1 | 3 | 0.041564 |
| 2 | 230899698..230933715 | SLC16A14 | -7.49254 | 3.3E-18 | 39 | 39 | 0.550061 | 49 | 49 | 0.697019 | 50 | 50 | 0.607137 | 3 | 3 | 0.054979 | 7 | 7 | 0.097787 | 5 | 5 | 0.062133 |
[truncated: 384,581 more chars]
